# Supplementary material for: Horizontal seismic wave at ground surface from transfer function based on ambient noise
Source: Frontiers journal article supplement (doi:10.3389/feart.2023.1047667), 2023-03-16

# Supplementary Material

**Supplementary Figure 1.** Ambient noise was calculated power spectral density (PSD)

(a) HAMB station : ground surface sensor (0 m) : EW - NS - UD

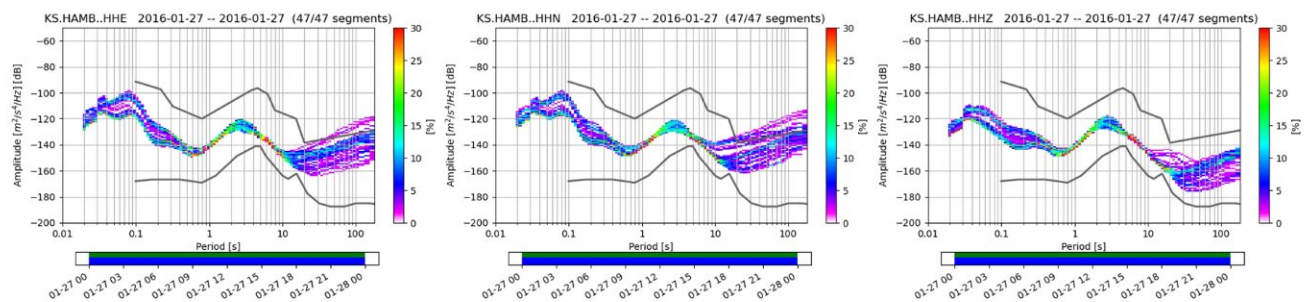

(b) HAMB station : borehole sensor (20 m) : EW - NS - UD

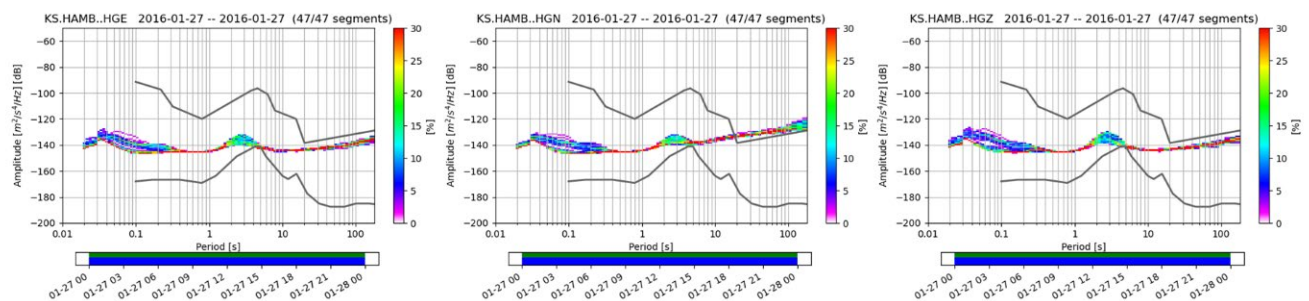

(c) IMWB station : ground surface sensor (0 m) : EW - NS - UD

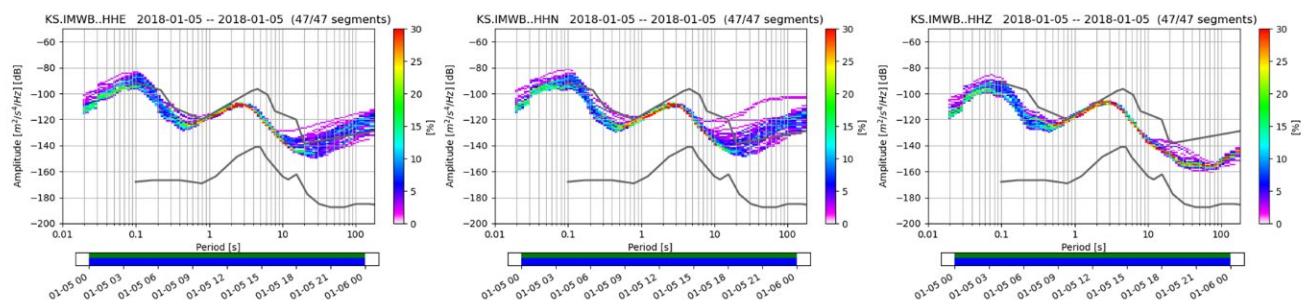

(d) IMWB station : borehole sensor (20 m) : EW - NS - UD

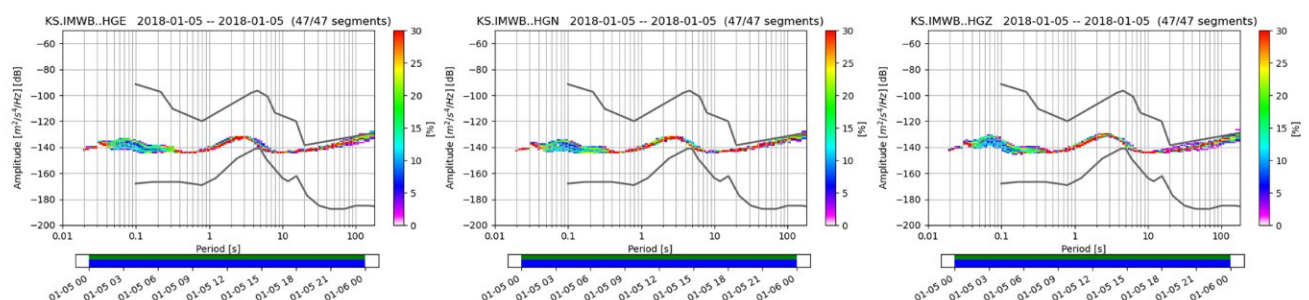

(e) YOCB station : ground surface sensor (0 m) / EW - NS - UD

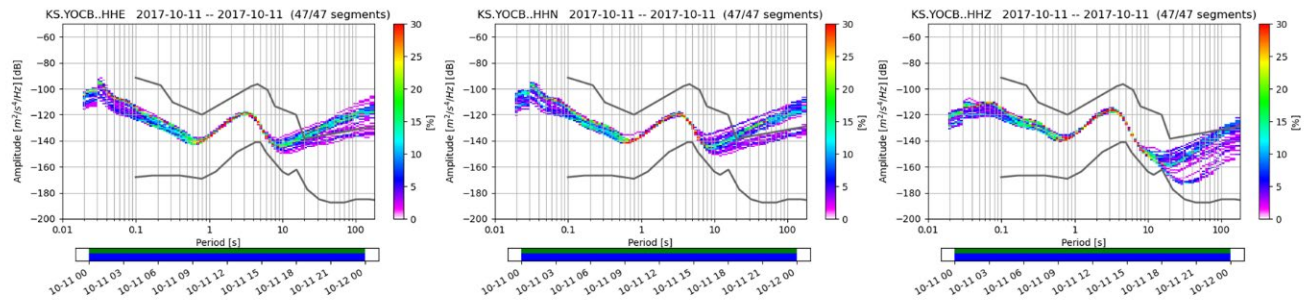

(f) YOCB station : borehole sensor (20 m) / EW - NS - UD

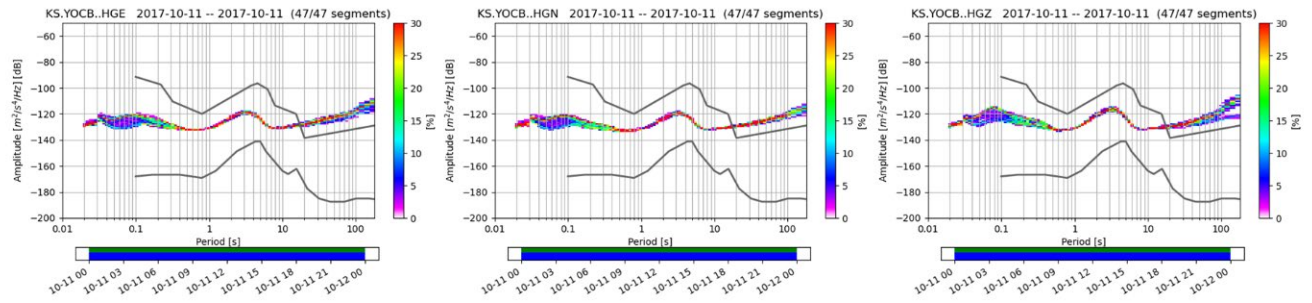

**Supplementary Figure 2.** Surface-to-within motion ratio (SWMR); left and center panel based on ambient noise; right panel based on HVSR.

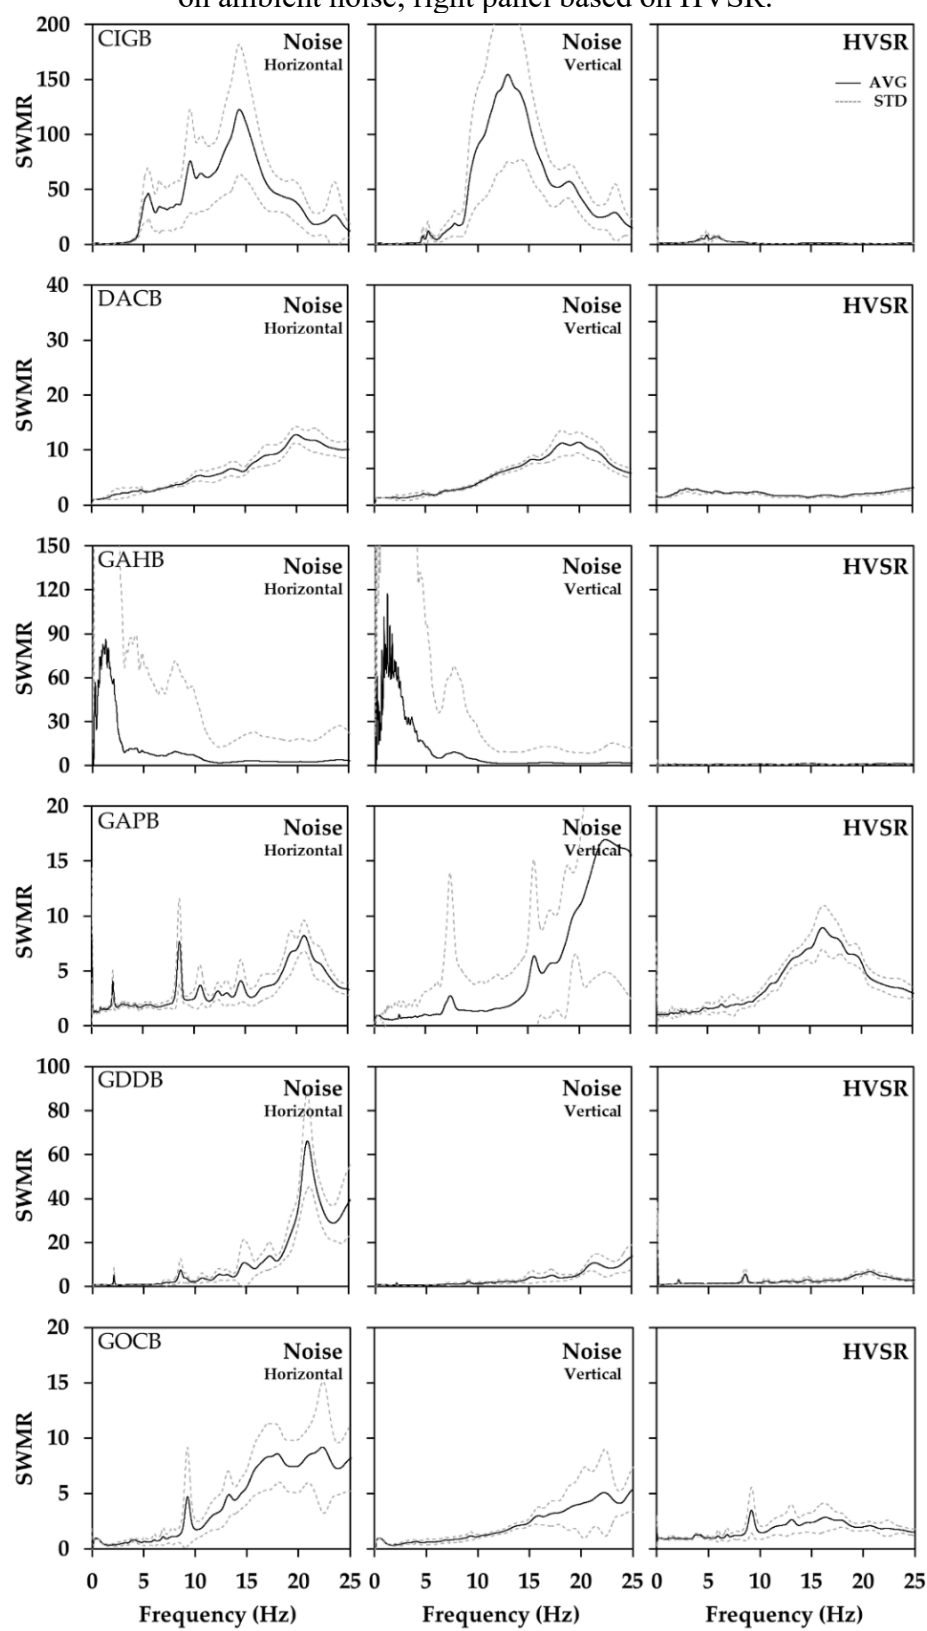

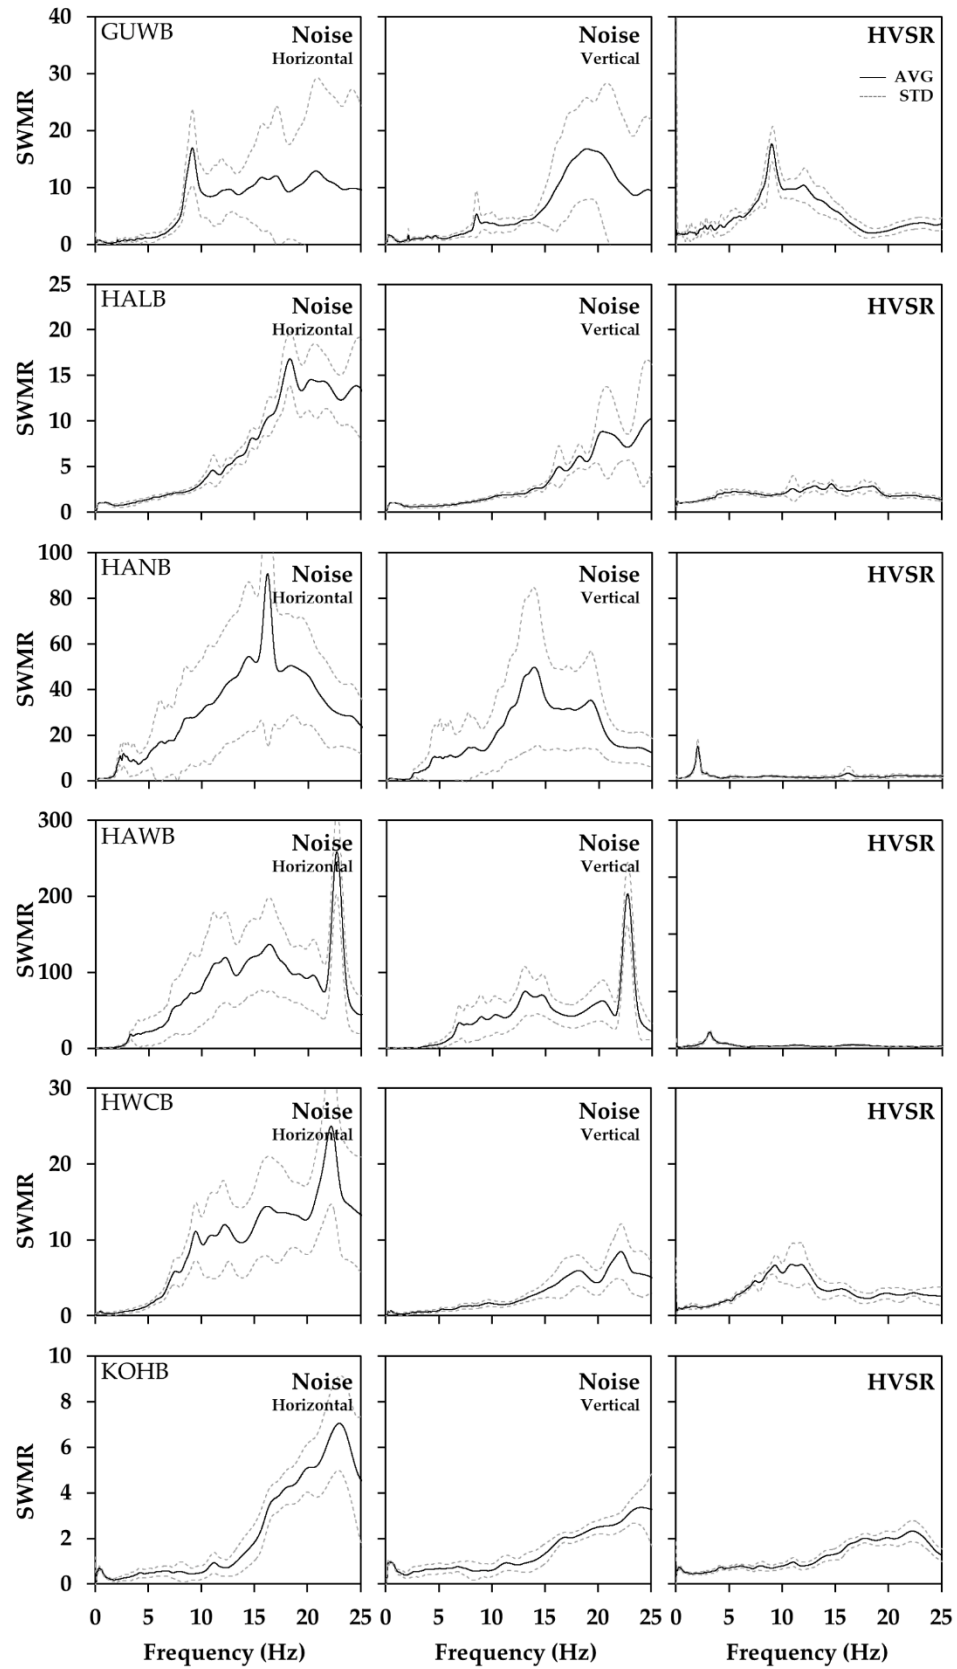

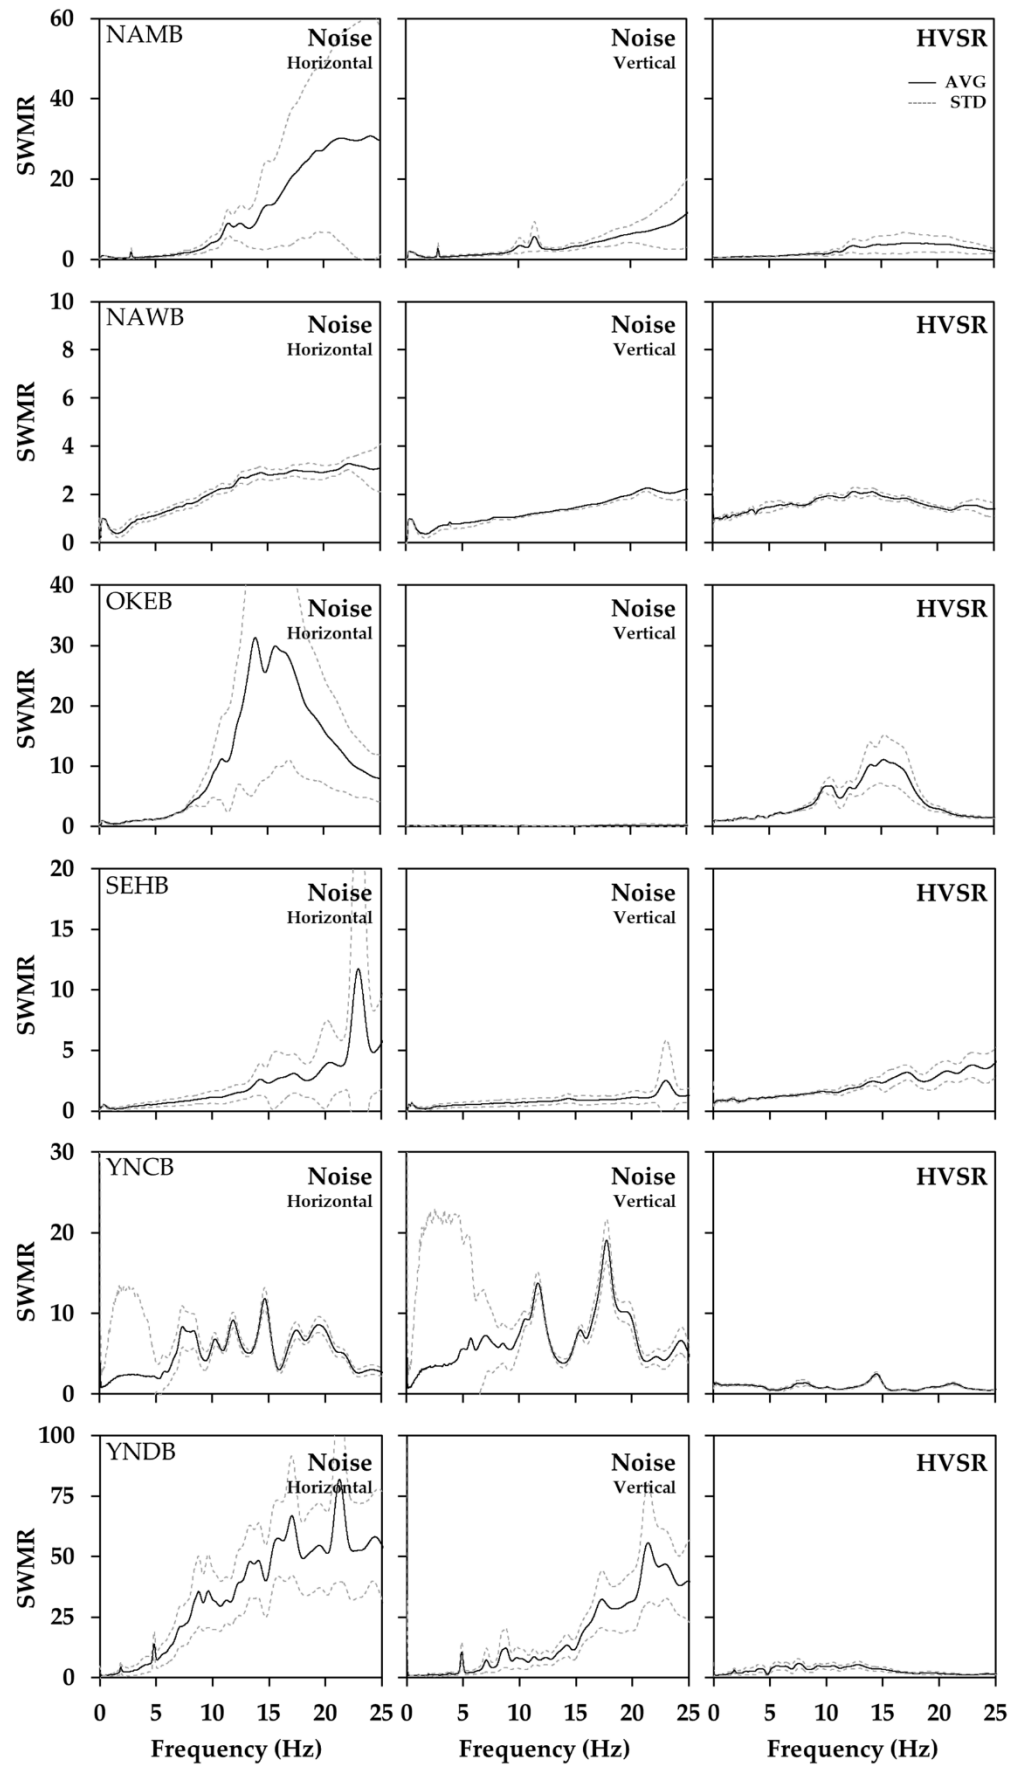

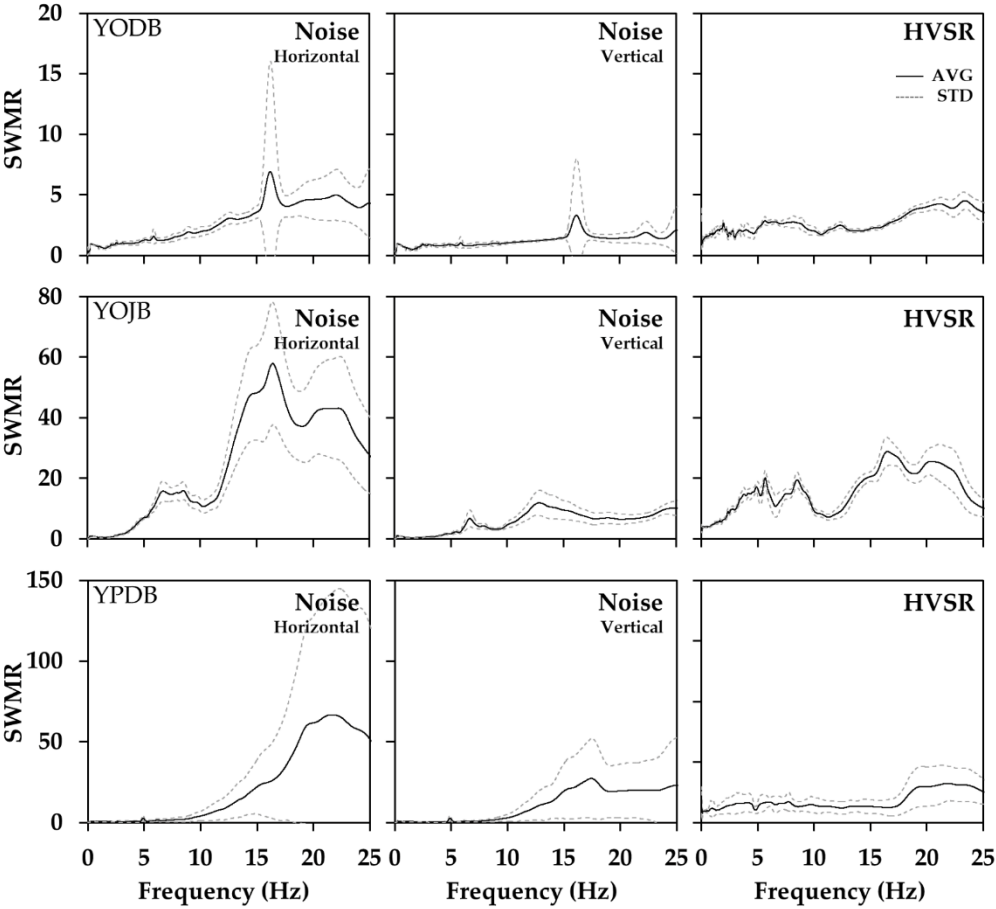

**Supplementary Figure 3. Transfer functions**

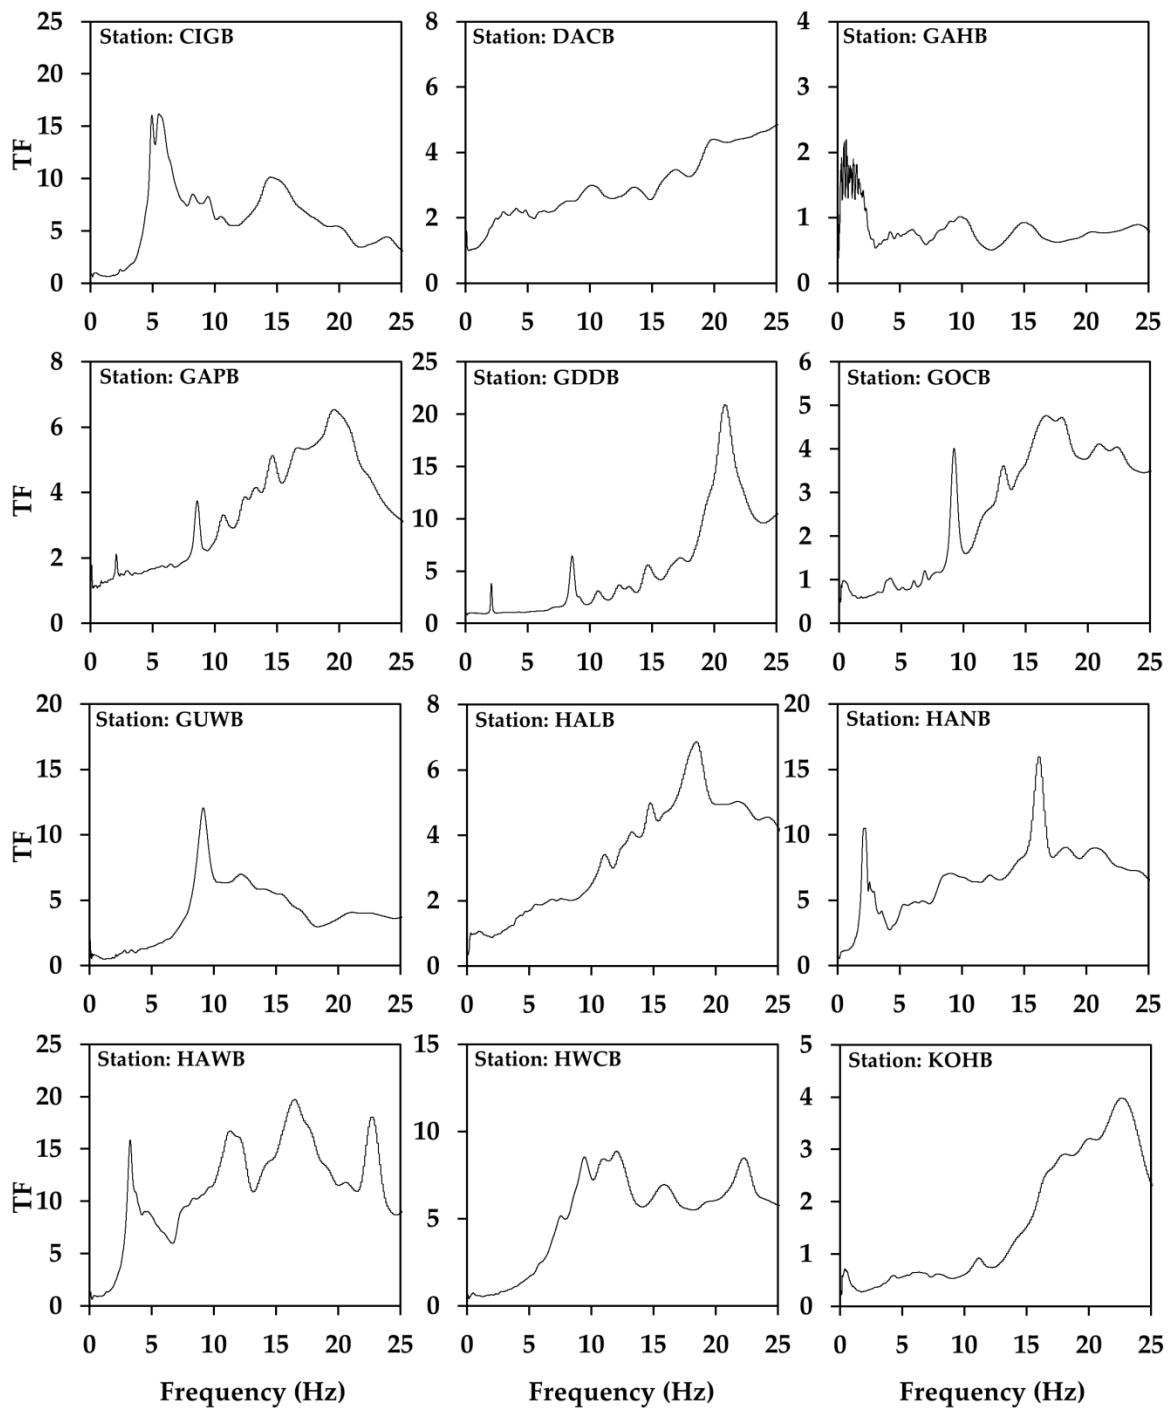

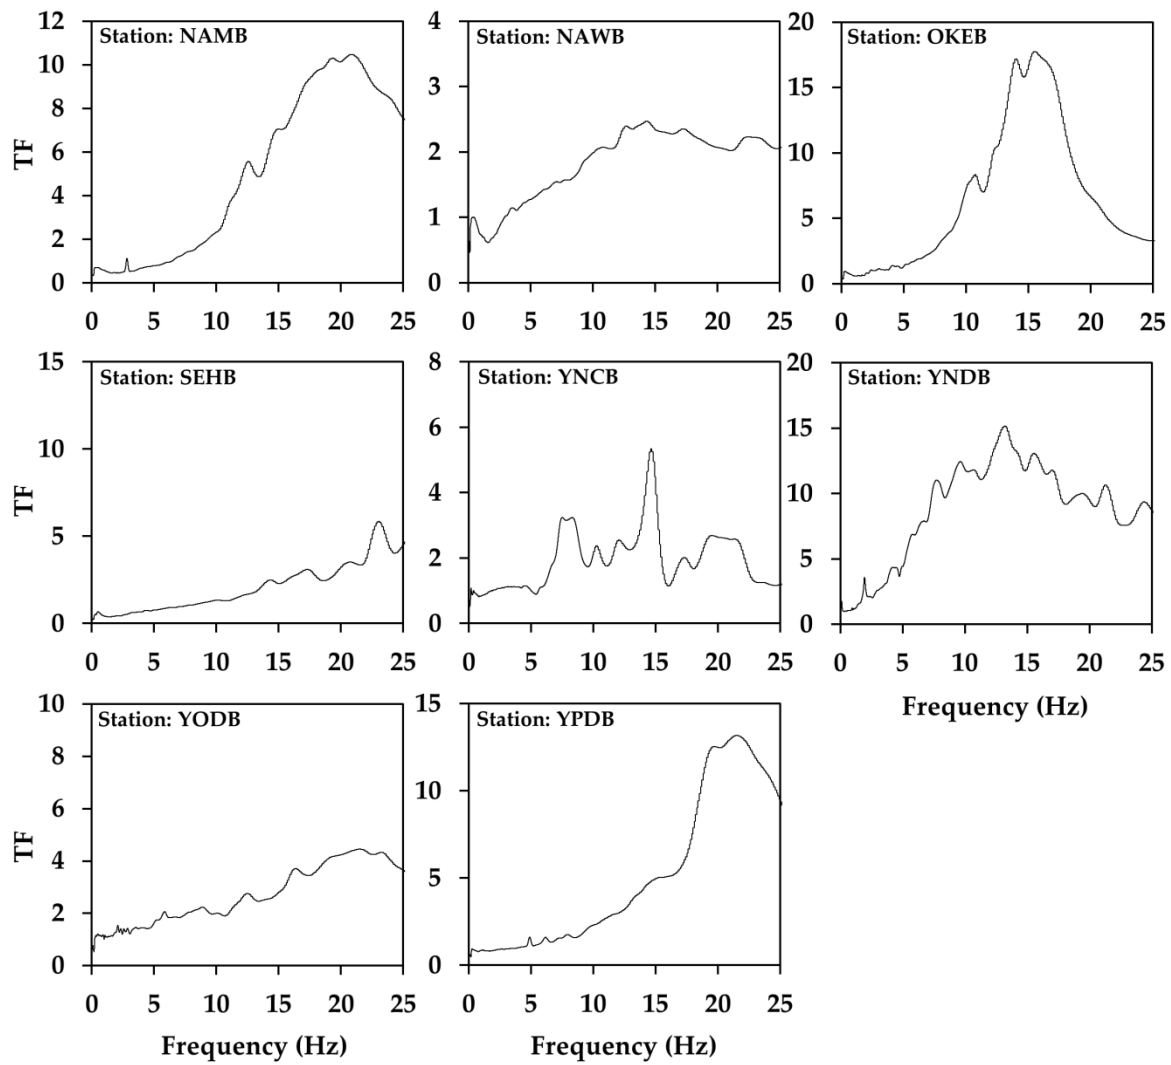

Supplement: Data_Sheet_1.pdf [file Data_Sheet_1.pdf]
