# Supplementary material for: Horizontal seismic wave at ground surface from transfer function based on ambient noise
Source: Frontiers journal article supplement (doi:10.3389/feart.2023.1047667), 2023-03-16
Supplement: Data_Sheet_2.xlsx [file Data_Sheet_2.xlsx]

## Sheet: Sheet1
Freq	CIGB	DACB	GAHB	GAPB	GDDB	GOCB	HALB	HANB	HAWB	HWCB	KOHB	NAMB	NAWB	OKEB	SEHB	GUWB	YNCB	YNDB	YODB	YOJB	YPDB	HAMB	IMWB	YOCB
0.00638892	0.842218	1.5927	0.385376	1.77482	0.933017	0.509144	0.411622	0.667687	1.28772	0.643058	0.298001	0.349462	0.637633	0.358273	0.275801	0.927755	0.51737	1.78684	0.740361	0.355933	0.610355	1.21816	0.976889	3.15383
0.0130556	0.842218	1.5927	0.385376	1.77482	0.933017	0.509144	0.411622	0.667687	1.28772	0.643058	0.298001	0.349462	0.637633	0.358273	0.275801	0.927755	0.51737	1.78684	0.740361	0.355933	0.610355	1.21816	0.976889	3.15383
0.0197223	0.842218	1.5927	0.385376	1.77482	0.933017	0.509144	0.411622	0.667687	1.28772	0.643058	0.298001	0.349462	0.637633	0.358273	0.275801	0.927755	0.51737	1.78684	0.740361	0.355933	0.610355	1.21816	0.976889	3.15383
0.026389	0.842218	1.5927	0.385376	1.77482	0.933017	0.509144	0.411622	0.667687	1.28772	0.643058	0.298001	0.349462	0.637633	0.358273	0.275801	0.927755	0.51737	1.78684	0.740361	0.355933	0.610355	1.21816	0.976889	3.15383
0.0330557	0.842218	1.5927	0.385376	1.77482	0.933017	0.509144	0.411622	0.667687	1.28772	0.643058	0.298001	0.349462	0.637633	0.358273	0.275801	0.927755	0.51737	1.78684	0.740361	0.355933	0.610355	1.21816	0.976889	3.15383
0.0397224	0.842218	1.5927	0.385376	1.77482	0.933017	0.509144	0.411622	0.667687	1.28772	0.643058	0.298001	0.349462	0.637633	0.358273	0.275801	0.927755	0.51737	1.78684	0.740361	0.355933	0.610355	1.21816	0.976889	3.15383
0.0463891	0.842218	1.5927	0.385376	1.77482	0.933017	0.509144	0.411622	0.667687	1.28772	0.643058	0.298001	0.349462	0.637633	0.358273	0.275801	0.927755	0.51737	1.78684	0.740361	0.355933	0.610355	1.21816	0.976889	3.15383
0.0530558	0.842218	1.5927	0.385376	1.77482	0.933017	0.509144	0.411622	0.667687	1.28772	0.643058	0.298001	0.349462	0.637633	0.358273	0.275801	0.927755	0.51737	1.78684	0.740361	0.355933	0.610355	1.21816	0.976889	3.15383
0.0597226	0.842218	1.5927	0.385376	1.77482	0.933017	0.509144	0.411622	0.667687	1.28772	0.643058	0.298001	0.349462	0.637633	0.358273	0.275801	0.927755	0.51737	1.78684	0.740361	0.355933	0.610355	1.21816	0.976889	3.15383
0.0663893	0.842218	1.5927	0.385376	1.77482	0.933017	0.509144	0.411622	0.667687	1.28772	0.643058	0.298001	0.349462	0.637633	0.358273	0.275801	0.927755	0.51737	1.78684	0.740361	0.355933	0.610355	1.21816	0.976889	3.15383
0.073056	0.842218	1.5927	0.385376	1.77482	0.933017	0.509144	0.411622	0.667687	1.28772	0.643058	0.298001	0.349462	0.637633	0.358273	0.275801	0.927755	0.51737	1.78684	0.740361	0.355933	0.610355	1.21816	0.976889	3.15383
0.0797227	0.842218	1.5927	0.385376	1.77482	0.933017	0.509144	0.411622	0.667687	1.28772	0.643058	0.298001	0.349462	0.637633	0.358273	0.275801	0.927755	0.51737	1.78684	0.740361	0.355933	0.610355	1.21816	0.976889	3.15383
0.0863894	0.842218	1.5927	0.385376	1.77482	0.933017	0.509144	0.411622	0.667687	1.28772	0.643058	0.298001	0.349462	0.637633	0.358273	0.275801	0.927755	0.51737	1.78684	0.740361	0.355933	0.610355	1.21816	0.976889	3.15383
0.0930561	0.842218	1.5927	0.385376	1.77482	0.933017	0.509144	0.411622	0.667687	1.28772	0.643058	0.298001	0.349462	0.637633	0.358273	0.275801	0.927755	0.51737	1.78684	0.740361	0.355933	0.610355	1.21816	0.976889	3.15383
0.0997228	0.842218	1.5927	0.385376	1.77482	0.933017	0.509144	0.411622	0.667687	1.28772	0.643058	0.298001	0.349462	0.637633	0.358273	0.275801	0.927755	0.51737	1.78684	0.740361	0.355933	0.610355	1.21816	0.976889	3.15383
0.106389	0.869938	1.48891	0.478003	1.77482	0.92509	0.544731	0.375497	0.610181	1.20067	0.518745	0.276995	0.320657	0.591865	0.369433	0.270283	0.851403	0.588241	1.78684	0.713487	0.348454	0.562177	1.30909	0.736383	2.40131
0.113056	0.832467	1.3821	0.670593	1.75381	0.885844	0.575931	0.353667	0.607349	1.07032	0.568349	0.244893	0.334396	0.557307	0.369221	0.259813	0.68014	0.662544	1.69664	0.734584	0.380597	0.594064	1.57793	0.886105	2.49112
0.119723	0.883017	1.31285	0.507409	1.55647	0.854435	0.526335	0.38834	0.598616	0.981469	0.516334	0.232494	0.327731	0.507924	0.386548	0.232371	0.632309	0.664215	1.67113	0.772189	0.357154	0.603676	0.917613	0.745728	2.15251
0.12639	0.787978	1.17148	0.600078	1.30997	0.817603	0.493151	0.373381	0.567368	0.863019	0.487131	0.227364	0.332004	0.469525	0.368177	0.221254	0.612504	0.611936	1.47003	0.640755	0.371049	0.597227	1.04818	0.832743	3.04842
0.133056	0.732892	1.10044	0.899884	1.31159	0.848558	0.498896	0.419729	0.571487	0.857509	0.436987	0.22809	0.34887	0.460955	0.375706	0.252099	0.603628	0.671375	1.37713	0.626382	0.367862	0.553556	1.00512	0.8034	2.10381
0.139723	0.695841	1.10893	0.71316	1.21986	0.844951	0.497877	0.425085	0.564169	0.799962	0.427683	0.237705	0.34056	0.468394	0.351739	0.253873	0.581955	0.696635	1.26515	0.595637	0.372045	0.532552	0.936682	0.942174	1.52026
0.14639	0.675459	1.08085	0.863027	1.18572	0.844263	0.526988	0.436891	0.584081	0.794595	0.406145	0.238347	0.332807	0.495956	0.369042	0.276763	0.532112	0.77671	1.27981	0.58905	0.375346	0.530086	0.991326	0.825702	1.67583
0.153056	0.701854	1.09705	0.767612	1.14099	0.827588	0.555217	0.439683	0.55147	0.763581	0.415494	0.247731	0.333891	0.546962	0.386934	0.299175	0.528695	0.837665	1.22081	0.562426	0.377999	0.508603	1.05331	1.0039	1.52889
0.159723	0.631403	1.09114	0.777569	1.09232	0.820631	0.600209	0.449165	0.542384	0.741052	0.417177	0.284511	0.355047	0.605779	0.380912	0.289268	0.531564	0.862399	1.12935	0.572299	0.382095	0.480389	0.872497	0.96999	1.23988
0.16639	0.628864	1.06734	0.880675	1.09372	0.805295	0.624914	0.439947	0.565451	0.745271	0.419365	0.352728	0.382088	0.683048	0.377086	0.286014	0.542963	0.960679	1.07407	0.579777	0.384017	0.489026	0.742244	0.976505	1.16276
0.173057	0.594451	1.04502	1.04235	1.09323	0.832831	0.664426	0.450725	0.556765	0.720479	0.432317	0.461067	0.434598	0.779276	0.383272	0.269736	0.572963	0.967653	1.05454	0.537161	0.385246	0.477628	0.775298	1.00438	1.19403
0.179723	0.578235	1.03609	0.963726	1.07666	0.892044	0.76841	0.49765	0.578563	0.662462	0.419434	0.552253	0.510808	0.842934	0.434208	0.271942	0.635265	1.04239	1.06433	0.522311	0.430177	0.476257	0.810318	0.933273	1.16615
0.18639	0.621486	1.01258	0.906011	1.13205	0.935574	0.853263	0.553325	0.610588	0.621506	0.430593	0.591178	0.589159	0.897305	0.548927	0.3012	0.761834	1.08089	1.05783	0.544005	0.535427	0.481003	0.835351	0.924649	1.09735
0.193057	0.659826	1.01419	0.941973	1.14753	0.959326	0.886445	0.62881	0.663678	0.647382	0.466421	0.59076	0.60449	0.894172	0.676754	0.344157	0.871942	1.07564	1.04313	0.551263	0.661349	0.52135	0.883924	0.947882	1.04274
0.199723	0.686232	1.01582	0.990268	1.13917	0.955298	0.890632	0.700368	0.697949	0.657516	0.474793	0.575831	0.608934	0.896253	0.758453	0.386877	0.920744	1.09116	1.03006	0.526674	0.759116	0.555505	0.925717	0.953439	1.01926
0.20639	0.709843	1.01255	1.05206	1.1261	0.952573	0.86419	0.735809	0.718523	0.657641	0.497833	0.564531	0.630469	0.87989	0.802228	0.421534	0.918501	1.08181	1.03748	0.614836	0.830956	0.580905	0.933458	0.94879	1.02648
0.213057	0.770839	1.01201	1.18744	1.11642	0.959335	0.844908	0.784198	0.749835	0.676834	0.53958	0.570329	0.644303	0.884588	0.856124	0.461701	0.891823	1.03253	1.02634	0.679749	0.870285	0.660278	0.887866	0.970402	1.14343
0.219723	0.82941	1.00593	1.26862	1.1117	0.971224	0.838428	0.809238	0.78082	0.686489	0.537151	0.570931	0.653529	0.905973	0.89424	0.500072	0.865241	1.01034	1.01681	0.762167	0.913963	0.755068	0.872834	0.96316	1.0641
0.22639	0.842031	1.00093	1.44451	1.10533	0.974603	0.829989	0.818684	0.810533	0.706914	0.517213	0.560718	0.661132	0.920071	0.905896	0.494747	0.803355	0.96342	1.02238	0.850921	0.934178	0.841944	0.806788	1.00029	1.01606
0.233057	0.879572	0.998919	1.58302	1.11055	0.973368	0.820534	0.836207	0.857359	0.719402	0.529697	0.569794	0.665978	0.932157	0.92172	0.484474	0.775318	0.947081	1.02824	0.939194	0.926906	0.888892	0.833162	1.00253	1.11912
0.239724	0.914141	1.00689	1.60892	1.10913	0.976122	0.827739	0.846725	0.902725	0.735847	0.530301	0.571865	0.672705	0.951985	0.922057	0.492659	0.780788	0.920069	1.01803	1.00089	0.937915	0.909176	0.866037	0.96962	1.03048
0.24639	0.927622	1.00578	1.72667	1.11899	0.973328	0.860553	0.871599	0.935995	0.745762	0.533219	0.568392	0.682156	0.967528	0.930641	0.494328	0.761021	0.908153	1.00521	1.03088	0.958335	0.920308	0.894743	0.986722	0.981906
0.253057	0.936443	1.00471	1.71696	1.12717	0.970645	0.889419	0.884852	0.965442	0.75209	0.539987	0.579046	0.684289	0.968013	0.928418	0.494894	0.742103	0.900036	0.998903	1.06446	0.961358	0.925485	0.893917	0.979944	0.996184
0.259724	0.952657	1.00199	1.59341	1.11353	0.972147	0.901359	0.906346	0.984081	0.776189	0.53239	0.586562	0.68675	0.980109	0.921825	0.496646	0.723556	0.892203	0.999762	1.07358	0.956175	0.928346	0.943281	0.984384	1.00177
0.26639	0.961256	0.99981	1.55084	1.10218	0.975867	0.909432	0.938864	0.997785	0.796524	0.536004	0.598133	0.690462	0.985609	0.920621	0.493368	0.736211	0.884665	1.00196	1.06367	0.952076	0.926925	0.998694	0.984635	1.00947
0.273057	0.96207	0.997608	1.56103	1.10463	0.977638	0.920544	0.973868	1.01521	0.817631	0.542041	0.616921	0.689665	0.983697	0.936896	0.493041	0.759278	0.879217	1.00273	1.0501	0.947311	0.928207	1.00312	0.994101	0.991508
0.279724	0.961092	0.998396	1.67764	1.10914	0.979255	0.936957	0.993245	1.02247	0.840993	0.5409	0.617524	0.688488	0.985411	0.94218	0.489207	0.7743	0.876734	1.00382	1.05679	0.949664	0.930749	1.00202	0.987755	0.998177
0.28639	0.959155	1.00324	1.62774	1.11002	0.981278	0.94741	0.998465	1.02172	0.868673	0.5565	0.613659	0.689205	0.990432	0.93032	0.489013	0.795282	0.869505	1.00396	1.08067	0.954742	0.926033	0.970919	0.987543	0.992512
0.293057	0.959705	1.00499	1.59295	1.1208	0.983176	0.953812	1.01002	1.02994	0.900436	0.571986	0.619624	0.691271	0.993313	0.921737	0.493357	0.815332	0.872217	1.00146	1.10392	0.952368	0.922669	0.945186	1.00156	0.986207
0.299724	0.964816	1.00406	1.70254	1.12597	0.982635	0.960237	1.02125	1.04155	0.919514	0.588708	0.623389	0.689595	0.996857	0.92223	0.494165	0.819608	0.877539	0.999315	1.11546	0.948483	0.919634	0.929482	1.00222	0.980845
0.306391	0.973018	1.00469	1.82339	1.1274	0.979107	0.964091	1.02785	1.04887	0.939748	0.594727	0.635408	0.690585	0.998359	0.927249	0.496545	0.820931	0.883789	1.00123	1.13287	0.945946	0.913483	0.907196	0.994425	0.983261
0.313057	0.977204	1.01106	1.82158	1.12635	0.978244	0.965611	1.02377	1.04938	0.957005	0.590045	0.646883	0.69412	0.998755	0.923118	0.509914	0.830911	0.895637	1.00445	1.14492	0.94454	0.903474	0.906167	1.00165	0.982251
0.319724	0.975781	1.01286	1.78666	1.13272	0.979592	0.969602	1.01606	1.05117	0.969227	0.594848	0.648418	0.697167	1.0006	0.913137	0.529586	0.839583	0.906151	1.00541	1.14321	0.945806	0.902369	0.93406	1.01476	0.970669
0.326391	0.976356	1.00782	1.87152	1.13937	0.982904	0.976425	1.01227	1.0554	0.978235	0.600487	0.647806	0.697124	1.00124	0.90723	0.543243	0.850031	0.909103	1.00557	1.14054	0.946814	0.905775	0.940163	1.01769	0.976182
0.333057	0.975379	1.00503	1.9228	1.13826	0.985996	0.979875	1.00515	1.05984	0.984869	0.600614	0.656675	0.693784	1.00133	0.901596	0.542396	0.854252	0.917354	1.00599	1.13673	0.945386	0.903213	0.932123	1.01101	0.991183
0.339724	0.971428	1.00621	1.84851	1.13859	0.987631	0.975757	0.998295	1.06587	0.985526	0.604798	0.674129	0.691551	1.00105	0.901979	0.533531	0.847899	0.93652	1.0058	1.12794	0.942185	0.901125	0.950844	1.0089	1.00843
0.346391	0.970727	1.00973	1.7186	1.13474	0.987933	0.970639	0.997101	1.07106	0.981326	0.615151	0.684591	0.691629	1.00125	0.913352	0.52633	0.843875	0.951726	1.0038	1.12043	0.943014	0.899731	0.962615	1.00775	1.01332
0.353058	0.974494	1.01641	1.54926	1.13163	0.987008	0.972887	0.995594	1.07156	0.980115	0.616362	0.68476	0.691268	1.00281	0.927528	0.526602	0.847226	0.967058	1.00194	1.11527	0.944487	0.895725	0.970445	1.00408	1.00855
0.359724	0.980251	1.02165	1.41138	1.14031	0.985573	0.981248	0.991694	1.0706	0.979961	0.614124	0.687809	0.691028	1.00371	0.930826	0.527001	0.846831	0.988551	1.00244	1.11293	0.945771	0.889897	0.965336	0.999817	1.00518
0.366391	0.981705	1.01938	1.34314	1.15254	0.984368	0.986619	0.985412	1.07213	0.980053	0.630652	0.69473	0.691427	1.00244	0.921702	0.520112	0.8431	0.999483	1.004	1.11707	0.951168	0.88394	0.940168	0.993915	1.00868
0.373058	0.980009	1.01537	1.31353	1.15948	0.9836	0.984707	0.975335	1.0768	0.983829	0.660259	0.698917	0.690516	1.00018	0.912495	0.515241	0.840815	0.994928	1.00624	1.12597	0.953325	0.877326	0.926954	0.983753	1.0125
0.379724	0.977643	1.01506	1.28485	1.16122	0.983413	0.981082	0.968009	1.0803	0.985238	0.690037	0.703934	0.689594	0.997931	0.902705	0.52061	0.838585	0.992631	1.00926	1.13294	0.947728	0.868253	0.940117	1.00635	1.00284
0.386391	0.976113	1.01707	1.26921	1.15898	0.983996	0.980342	0.968402	1.08167	0.980707	0.709604	0.713082	0.689218	0.996934	0.88895	0.53544	0.834231	0.999822	1.01125	1.13263	0.94458	0.863604	0.951163	1.02122	0.990455
0.393058	0.979022	1.02077	1.28639	1.15606	0.984898	0.981923	0.972477	1.08449	0.977503	0.711881	0.719209	0.688437	0.998299	0.879027	0.554502	0.827933	1.00427	1.01069	1.13485	0.948746	0.868969	0.951669	1.01035	0.987416
0.399724	0.982482	1.02449	1.31115	1.15316	0.985572	0.98255	0.975622	1.08904	0.977876	0.699977	0.71741	0.688629	0.999967	0.879171	0.570017	0.821302	0.999728	1.00996	1.14913	0.95364	0.87502	0.962898	1.00525	0.989384
0.406391	0.979807	1.02531	1.30993	1.15202	0.987062	0.979869	0.976205	1.09225	0.977598	0.686975	0.713147	0.689658	1.00032	0.883107	0.578718	0.813038	0.994127	1.01155	1.16701	0.954093	0.874084	0.986894	1.01063	0.99006
0.413058	0.973803	1.02455	1.31004	1.15324	0.988376	0.974861	0.974476	1.09542	0.975074	0.684027	0.712049	0.690125	1.00035	0.881934	0.58436	0.80373	0.9905	1.01418	1.17658	0.951557	0.86943	0.996791	1.01362	0.985229
0.419725	0.969883	1.02369	1.34019	1.15417	0.987818	0.971211	0.972006	1.10007	0.971398	0.690921	0.712816	0.690314	1.00122	0.873836	0.591774	0.797978	0.978614	1.01523	1.17775	0.946684	0.866949	0.99534	1.00421	0.983358
0.426391	0.968445	1.02201	1.38556	1.15516	0.986042	0.968601	0.97079	1.10332	0.968356	0.702721	0.709616	0.690581	1.00165	0.864337	0.599394	0.79468	0.957398	1.01469	1.17497	0.941337	0.866053	0.983657	1.00322	0.98972
0.433058	0.967567	1.02137	1.43791	1.15801	0.984629	0.966876	0.971035	1.10355	0.967483	0.713242	0.700666	0.691196	1.0005	0.856446	0.607424	0.792506	0.940583	1.01433	1.17163	0.940733	0.865895	0.969629	1.00717	0.99753
0.439725	0.967007	1.02254	1.511	1.1624	0.985246	0.968286	0.971783	1.10348	0.967763	0.718311	0.692903	0.692955	0.999427	0.848421	0.620312	0.793791	0.937546	1.01447	1.16844	0.943599	0.868104	0.968445	1.00752	0.998939
0.446391	0.967919	1.02312	1.60801	1.16551	0.988277	0.971641	0.972458	1.10584	0.964852	0.720948	0.69135	0.695084	1	0.842257	0.635903	0.796149	0.945291	1.01364	1.1657	0.943878	0.8696	0.97691	1.00633	0.995946
0.453058	0.968529	1.0214	1.71564	1.16264	0.992031	0.97322	0.973112	1.1101	0.957877	0.728124	0.691685	0.695738	1.00038	0.838021	0.646972	0.794355	0.953779	1.01107	1.16578	0.939483	0.866481	0.9782	1.00069	0.994164
0.459725	0.96658	1.01937	1.82262	1.1542	0.994245	0.971935	0.973567	1.11461	0.951309	0.741356	0.688977	0.694703	0.998174	0.832135	0.65374	0.791445	0.956497	1.00782	1.17062	0.93274	0.862088	0.971197	0.99832	0.995262
0.466391	0.963804	1.02076	1.92713	1.14558	0.994245	0.969267	0.973819	1.11803	0.949026	0.754093	0.685914	0.693468	0.994332	0.825225	0.660497	0.792697	0.952849	1.00669	1.17386	0.928601	0.861056	0.971728	1.00198	0.999899
0.473058	0.962472	1.025	2.01811	1.1405	0.99364	0.967214	0.974219	1.11951	0.950647	0.758043	0.686	0.693086	0.991784	0.819851	0.666788	0.795636	0.946136	1.00909	1.17076	0.929729	0.862132	0.976918	1.00303	1.00093
0.479725	0.960985	1.02787	2.07244	1.13727	0.993431	0.965897	0.974992	1.1201	0.952898	0.751831	0.687569	0.692778	0.991677	0.818249	0.670919	0.794908	0.941108	1.01313	1.16876	0.932151	0.86262	0.976716	0.996887	0.994615
0.486392	0.957043	1.02812	2.0734	1.13162	0.993082	0.964317	0.97628	1.12172	0.95262	0.743067	0.688497	0.691466	0.993153	0.822106	0.673461	0.791674	0.939909	1.01588	1.17521	0.93117	0.862133	0.968068	0.988175	0.988188
0.493058	0.951642	1.0278	2.01919	1.12296	0.992248	0.962438	0.977841	1.12536	0.948468	0.740351	0.689893	0.689847	0.994734	0.829547	0.675158	0.789181	0.940053	1.01695	1.18897	0.927284	0.860491	0.953676	0.983996	0.987614
0.499725	0.947116	1.02813	1.92569	1.11465	0.990836	0.96009	0.979018	1.13027	0.94246	0.744215	0.691678	0.688877	0.994804	0.83533	0.675009	0.786078	0.938882	1.0181	1.20292	0.923795	0.857643	0.945028	0.987069	0.990403
0.506392	0.94417	1.02911	1.83157	1.10906	0.989154	0.957407	0.979698	1.13409	0.939697	0.747605	0.689625	0.688332	0.992762	0.836152	0.671453	0.781197	0.938447	1.02051	1.21079	0.922006	0.854617	0.948028	0.99174	0.991969
0.513058	0.941606	1.03073	1.78295	1.1045	0.988111	0.955158	0.980658	1.13572	0.942594	0.745281	0.682396	0.687274	0.989411	0.832891	0.664359	0.776878	0.939201	1.02372	1.21064	0.921023	0.851572	0.958568	0.994166	0.989107
0.519725	0.938408	1.03269	1.80574	1.09818	0.987955	0.954154	0.982639	1.13589	0.947551	0.738356	0.674907	0.685592	0.986475	0.827678	0.656965	0.775518	0.938221	1.02703	1.20229	0.920707	0.847172	0.966953	0.996807	0.983314
0.526392	0.934137	1.03354	1.89466	1.09166	0.988138	0.954804	0.985338	1.13512	0.949603	0.730054	0.670843	0.684616	0.984689	0.822239	0.65457	0.776044	0.934392	1.03017	1.18959	0.921403	0.841101	0.973913	1.00107	0.980019
0.533059	0.928142	1.03261	2.015	1.0902	0.988516	0.956197	0.987515	1.13494	0.946884	0.722775	0.668721	0.685091	0.983451	0.818399	0.658529	0.774987	0.929962	1.03251	1.17917	0.921255	0.835674	0.981246	1.00327	0.982706
0.539725	0.920492	1.03132	2.11707	1.09667	0.989279	0.956612	0.988262	1.13765	0.940584	0.717254	0.665868	0.686085	0.982447	0.816907	0.663664	0.770253	0.926707	1.0336	1.17428	0.917787	0.833149	0.987031	1.00449	0.988209
0.546392	0.91315	1.03154	2.16395	1.10812	0.990213	0.955144	0.987848	1.14344	0.932523	0.712021	0.662421	0.68609	0.981832	0.815731	0.664372	0.762906	0.923229	1.03376	1.17319	0.912193	0.833661	0.982008	1.00624	0.992194
0.553059	0.908604	1.03372	2.14592	1.11794	0.990838	0.952224	0.987225	1.14971	0.923529	0.705482	0.661022	0.684691	0.981184	0.811127	0.660187	0.755865	0.917322	1.03378	1.17301	0.908096	0.835194	0.965437	1.00933	0.993981
0.559725	0.907184	1.03679	2.07508	1.1209	0.991017	0.948946	0.986908	1.15312	0.914695	0.698728	0.66352	0.682661	0.978853	0.801313	0.654049	0.751339	0.909254	1.03459	1.17186	0.906354	0.834944	0.946466	1.01177	0.992554
0.566392	0.906205	1.03931	1.97361	1.11752	0.990836	0.946008	0.986633	1.15227	0.907731	0.694218	0.668515	0.68049	0.973327	0.789029	0.648189	0.749843	0.902518	1.03697	1.16907	0.90479	0.832115	0.9335	1.00992	0.990358
0.573059	0.902301	1.04067	1.85908	1.11313	0.990571	0.943557	0.985802	1.14882	0.903584	0.692082	0.672373	0.677609	0.965499	0.779002	0.642501	0.750938	0.89981	1.04081	1.1653	0.901821	0.828398	0.934337	1.00808	0.990533
0.579725	0.894968	1.04108	1.73836	1.11245	0.990572	0.941353	0.983986	1.14541	0.902474	0.690463	0.671987	0.673654	0.958314	0.773587	0.636286	0.752542	0.899177	1.04521	1.16144	0.897266	0.825802	0.945981	1.00658	0.992385
0.586392	0.886775	1.04072	1.61901	1.11637	0.990701	0.938385	0.981466	1.14354	0.904427	0.688166	0.666802	0.669372	0.953928	0.771932	0.629679	0.751448	0.896637	1.04898	1.15782	0.890758	0.824622	0.954784	0.999803	0.995425
0.593059	0.880263	1.03962	1.51665	1.1232	0.99043	0.934014	0.979202	1.14337	0.908661	0.684832	0.659241	0.665864	0.952082	0.771761	0.623298	0.746297	0.891599	1.05139	1.1547	0.882177	0.823538	0.956005	0.989498	0.999878
0.599726	0.875784	1.03821	1.44379	1.13096	0.989485	0.929173	0.978122	1.14465	0.91356	0.680001	0.652595	0.663614	0.951119	0.771696	0.617515	0.7389	0.887405	1.05312	1.15283	0.873112	0.821341	0.954416	0.981899	1.00412
0.606392	0.871973	1.03704	1.39914	1.13809	0.988189	0.925409	0.978597	1.14725	0.917464	0.673652	0.648662	0.662462	0.949789	0.771748	0.612441	0.732521	0.886681	1.05571	1.15277	0.865414	0.818463	0.950994	0.979495	1.0051
0.613059	0.867278	1.03647	1.37019	1.14308	0.987346	0.923074	0.98037	1.15101	0.91819	0.667445	0.647277	0.662343	0.947838	0.771819	0.608427	0.728718	0.888529	1.06003	1.15377	0.85929	0.816586	0.943476	0.982425	1.00162
0.619726	0.861019	1.0367	1.34491	1.14494	0.987318	0.921304	0.982777	1.1551	0.913377	0.663809	0.646931	0.663091	0.945174	0.770992	0.605789	0.72665	0.890471	1.06544	1.1548	0.854003	0.816246	0.932641	0.990992	0.995637
0.626392	0.853465	1.0376	1.32134	1.14455	0.987468	0.919425	0.985061	1.15841	0.9028	0.663535	0.645516	0.66401	0.941285	0.768121	0.604117	0.72543	0.890941	1.07048	1.15569	0.849606	0.816198	0.922394	1.0031	0.990299
0.633059	0.845411	1.03882	1.30641	1.14427	0.987013	0.917594	0.986683	1.16055	0.889754	0.665043	0.641172	0.664421	0.936044	0.762711	0.602553	0.725096	0.889854	1.07367	1.15673	0.846904	0.815198	0.914871	1.00836	0.986838
0.639726	0.837746	1.03989	1.30764	1.14551	0.986193	0.916159	0.987454	1.16209	0.879773	0.665476	0.633349	0.664145	0.930019	0.755287	0.60074	0.725656	0.88805	1.07413	1.15773	0.846017	0.813189	0.91089	1.00522	0.984883
0.646392	0.830941	1.04064	1.32831	1.14742	0.986087	0.915027	0.987479	1.16377	0.877294	0.662302	0.623252	0.66305	0.923653	0.74739	0.598708	0.726201	0.886323	1.07223	1.15779	0.845701	0.810759	0.911786	0.999713	0.98513
0.653059	0.824793	1.04127	1.36886	1.14803	0.987461	0.913743	0.987128	1.16584	0.882399	0.654753	0.613122	0.660752	0.916996	0.741248	0.59611	0.725274	0.884759	1.0693	1.15626	0.844115	0.808347	0.917575	0.993227	0.987993
0.659726	0.818814	1.04208	1.43114	1.14585	0.990057	0.911942	0.986933	1.16782	0.890778	0.64443	0.604745	0.657056	0.910235	0.738458	0.592572	0.721961	0.882425	1.06666	1.15378	0.840309	0.806055	0.925999	0.98642	0.991841
0.666393	0.812958	1.04323	1.51991	1.14095	0.992804	0.909532	0.987348	1.16887	0.897373	0.634402	0.598378	0.652275	0.903985	0.738697	0.588318	0.716448	0.878191	1.06525	1.15178	0.835046	0.803747	0.933469	0.981178	0.995125
0.673059	0.807713	1.0446	1.63926	1.13487	0.994498	0.906529	0.988548	1.16861	0.899717	0.627194	0.593025	0.64696	0.898753	0.740077	0.584002	0.709923	0.872269	1.06576	1.15123	0.830154	0.801354	0.936041	0.978995	0.997681
0.679726	0.803426	1.04586	1.78777	1.12967	0.994385	0.90286	0.990353	1.1675	0.898445	0.623403	0.587665	0.641492	0.894489	0.740675	0.580199	0.70384	0.866386	1.06855	1.15237	0.827126	0.799135	0.931939	0.979776	0.998588
0.686393	0.800006	1.04689	1.95212	1.12724	0.992412	0.898542	0.992231	1.16604	0.896363	0.621918	0.581933	0.636104	0.890748	0.739698	0.576907	0.699018	0.862334	1.07297	1.15489	0.826078	0.797362	0.923738	0.981387	0.995891
0.693059	0.797382	1.048	2.09992	1.12899	0.989197	0.894073	0.993495	1.16437	0.896807	0.621017	0.575702	0.63118	0.887111	0.73746	0.573334	0.695367	0.860498	1.07737	1.15751	0.825771	0.79596	0.917018	0.980853	0.989
0.699726	0.795954	1.04926	2.18818	1.13486	0.985798	0.890132	0.993664	1.16276	0.901528	0.619389	0.568718	0.627299	0.883534	0.734496	0.568305	0.692336	0.859692	1.08006	1.15834	0.824612	0.794645	0.915623	0.975335	0.981115
0.706393	0.796212	1.0504	2.1938	1.14271	0.983215	0.886662	0.992787	1.16199	0.909763	0.616716	0.560988	0.624863	0.880319	0.730996	0.561312	0.689615	0.858469	1.08021	1.15605	0.821731	0.792889	0.918244	0.966715	0.976603
0.71306	0.797713	1.05126	2.13144	1.14922	0.981864	0.882701	0.991426	1.16271	0.919058	0.613378	0.553073	0.623773	0.877615	0.726975	0.553082	0.687425	0.856532	1.07824	1.15072	0.817265	0.789921	0.92201	0.961782	0.977301
0.719726	0.798751	1.05216	2.03785	1.15174	0.981453	0.877243	0.990378	1.16462	0.926538	0.609662	0.545721	0.623637	0.87507	0.722632	0.544972	0.686012	0.854642	1.07527	1.14403	0.811881	0.785366	0.923702	0.963842	0.981963
0.726393	0.797432	1.05333	1.94571	1.14956	0.981274	0.870117	0.990446	1.16671	0.929939	0.605703	0.539317	0.624104	0.872123	0.718419	0.538074	0.685149	0.853364	1.07203	1.13818	0.806231	0.779798	0.920812	0.970723	0.988117
0.73306	0.793063	1.05445	1.87142	1.14406	0.98069	0.862147	0.992193	1.16809	0.928522	0.602081	0.533793	0.62482	0.868548	0.714911	0.532674	0.684065	0.852349	1.06859	1.13443	0.800748	0.774528	0.916025	0.979468	0.993906
0.739726	0.786607	1.05468	1.81928	1.13794	0.979513	0.854573	0.995688	1.16869	0.923585	0.599749	0.528949	0.625275	0.864456	0.71261	0.528166	0.681957	0.850795	1.06486	1.13242	0.795661	0.770882	0.913421	0.989325	0.998085
0.746393	0.779945	1.0535	1.791	1.13371	0.977939	0.848188	1.00048	1.16928	0.917991	0.59905	0.524632	0.624885	0.859737	0.711783	0.52354	0.678683	0.848184	1.06114	1.13088	0.791068	0.769569	0.914886	0.999016	1.00022
0.75306	0.774682	1.05141	1.78967	1.13273	0.976157	0.842887	1.00584	1.17063	0.914869	0.599127	0.520578	0.623279	0.853934	0.71229	0.518156	0.674915	0.844581	1.05797	1.12873	0.786995	0.770453	0.919672	1.00362	1.00063
0.759726	0.771404	1.04968	1.8162	1.13542	0.974202	0.837892	1.01109	1.17286	0.916235	0.598573	0.51629	0.620541	0.846981	0.713378	0.512195	0.671587	0.84044	1.05553	1.12573	0.783424	0.772754	0.924829	1.00438	1.00004
0.766393	0.769653	1.04931	1.86374	1.14196	0.972203	0.832469	1.01579	1.17534	0.922111	0.596664	0.511264	0.617191	0.839789	0.713737	0.506463	0.669103	0.836157	1.05363	1.12234	0.780211	0.775505	0.927296	1.0044	0.999299
0.77306	0.76839	1.05034	1.9152	1.15233	0.970554	0.82654	1.01968	1.17719	0.930166	0.59389	0.505371	0.613895	0.833805	0.712118	0.501776	0.667146	0.831781	1.05228	1.11922	0.77702	0.777877	0.925927	1.00293	0.998714
0.779727	0.766651	1.05219	1.94654	1.16594	0.969758	0.820575	1.02269	1.17797	0.936374	0.591437	0.498989	0.611099	0.829981	0.708153	0.498557	0.665039	0.827311	1.05189	1.11692	0.773427	0.779244	0.922029	1.00065	0.997786
0.786393	0.764047	1.05419	1.93665	1.18139	0.97013	0.814923	1.02476	1.17789	0.937191	0.590239	0.492762	0.608873	0.828013	0.702556	0.496732	0.662105	0.823123	1.05297	1.11594	0.769144	0.77935	0.918033	0.998579	0.995314
0.79306	0.760871	1.05591	1.87901	1.19671	0.971523	0.809398	1.02587	1.17749	0.931952	0.59043	0.487203	0.606981	0.826468	0.696527	0.495685	0.657883	0.819914	1.05566	1.11663	0.764284	0.778537	0.915281	0.996795	0.990997
0.799727	0.757729	1.05718	1.78491	1.20992	0.97323	0.803436	1.02605	1.17737	0.923349	0.591403	0.482534	0.605091	0.82375	0.691044	0.494332	0.652223	0.818304	1.05945	1.11888	0.759399	0.77761	0.913386	0.995565	0.986474
0.806393	0.754948	1.05806	1.67494	1.21981	0.974417	0.796482	1.02548	1.17809	0.915664	0.592266	0.478705	0.602978	0.819153	0.68661	0.491565	0.645269	0.818534	1.06324	1.1221	0.75508	0.77733	0.911873	0.994454	0.984093
0.81306	0.75231	1.05877	1.56821	1.22675	0.974819	0.788368	1.02444	1.18005	0.912323	0.592392	0.475407	0.600648	0.813137	0.683215	0.486884	0.637412	0.8203	1.06593	1.12527	0.751498	0.778032	0.910892	0.991492	0.984436
0.819727	0.749266	1.05956	1.47702	1.23265	0.974973	0.779581	1.0233	1.18333	0.914235	0.591674	0.472119	0.598356	0.806727	0.68037	0.480708	0.629194	0.822851	1.06718	1.12727	0.748345	0.779557	0.911014	0.985246	0.985632
0.826393	0.745332	1.0605	1.4067	1.24001	0.97578	0.771129	1.02245	1.18747	0.919572	0.590269	0.468275	0.596515	0.800728	0.677482	0.474092	0.621117	0.825418	1.0675	1.12786	0.745162	0.781411	0.912847	0.977022	0.985219
0.83306	0.740381	1.06145	1.35745	1.25069	0.97786	0.763995	1.02224	1.19172	0.925113	0.58823	0.46352	0.595459	0.795429	0.674298	0.468185	0.613364	0.827625	1.06784	1.12799	0.741711	0.783059	0.916198	0.970552	0.982463
0.839727	0.734782	1.06216	1.32637	1.26492	0.981152	0.758646	1.02292	1.19542	0.928324	0.585599	0.457891	0.595179	0.790702	0.671025	0.463767	0.60569	0.829528	1.06919	1.12915	0.738179	0.784252	0.920023	0.968696	0.978764
0.846394	0.729298	1.06249	1.30948	1.28096	0.984882	0.754945	1.02463	1.19846	0.928551	0.582676	0.451824	0.595244	0.786215	0.66803	0.461042	0.597778	0.831377	1.07224	1.1323	0.735053	0.785205	0.923197	0.971518	0.976265
0.85306	0.724811	1.0625	1.30402	1.29561	0.987925	0.75233	1.02739	1.20126	0.926765	0.579906	0.44598	0.595012	0.781718	0.665429	0.459723	0.589693	0.833355	1.07722	1.13759	0.73281	0.786499	0.925106	0.97735	0.976259
0.859727	0.721984	1.06242	1.3104	1.30544	0.989372	0.750115	1.03101	1.20446	0.924609	0.577685	0.440963	0.594034	0.777226	0.662927	0.459302	0.582072	0.835405	1.08386	1.14476	0.731683	0.78879	0.925787	0.983862	0.978653
0.866394	0.721015	1.06257	1.33242	1.30831	0.988946	0.74778	1.03524	1.20839	0.923581	0.57637	0.437039	0.592326	0.772891	0.660031	0.459329	0.575929	0.837191	1.09165	1.15333	0.731569	0.792484	0.925847	0.988434	0.982342
0.87306	0.721524	1.06332	1.37515	1.30421	0.987066	0.745147	1.03979	1.2128	0.924534	0.576225	0.434025	0.590303	0.768709	0.656383	0.459551	0.57216	0.838169	1.1005	1.16246	0.732099	0.797536	0.92633	0.989888	0.98578
0.879727	0.722629	1.06493	1.44127	1.29508	0.984612	0.742331	1.04448	1.21704	0.927288	0.577235	0.431429	0.588443	0.764442	0.651963	0.459882	0.571089	0.83778	1.11135	1.17083	0.732781	0.803409	0.928373	0.989769	0.987743
0.886394	0.723222	1.06739	1.52776	1.2836	0.982491	0.739546	1.04913	1.22043	0.93061	0.579021	0.428747	0.586991	0.759923	0.647109	0.460253	0.572316	0.835745	1.12596	1.17696	0.733147	0.809273	0.932681	0.99024	0.987939
0.893061	0.722323	1.07042	1.62409	1.27205	0.981237	0.736931	1.05356	1.22259	0.932909	0.580939	0.425704	0.585946	0.755411	0.642382	0.46049	0.574918	0.832336	1.14599	1.17971	0.732859	0.814372	0.939054	0.992096	0.986841
0.899727	0.719397	1.07358	1.7132	1.26169	0.980892	0.734514	1.05747	1.22365	0.933236	0.582327	0.42232	0.585237	0.751562	0.638316	0.460326	0.577863	0.828453	1.17149	1.17877	0.731812	0.818358	0.946158	0.995723	0.985235
0.906394	0.714553	1.07643	1.77626	1.25304	0.981158	0.732278	1.06052	1.22426	0.931792	0.582769	0.418842	0.584862	0.748989	0.635207	0.459518	0.580411	0.825351	1.20005	1.17475	0.730204	0.821398	0.952387	1.00077	0.98396
0.913061	0.708521	1.07872	1.80036	1.24638	0.981655	0.730215	1.0624	1.22529	0.929671	0.582212	0.415596	0.58489	0.747787	0.633068	0.457951	0.582305	0.824094	1.22708	1.16892	0.728467	0.824041	0.957142	1.00483	0.983738
0.919727	0.702396	1.08038	1.78507	1.24185	0.982107	0.728318	1.063	1.22743	0.9282	0.580893	0.412825	0.585349	0.747422	0.631723	0.455677	0.583688	0.825	1.24747	1.16256	0.727023	0.826859	0.960369	1.00635	0.984955
0.926394	0.697241	1.0815	1.74202	1.23938	0.982383	0.726575	1.06248	1.23091	0.928306	0.579193	0.41057	0.586092	0.747044	0.630907	0.452869	0.584854	0.827429	1.25773	1.15651	0.726081	0.830124	0.961725	1.00648	0.987411
0.933061	0.693722	1.08233	1.68739	1.23864	0.982425	0.724932	1.06121	1.23561	0.930115	0.57752	0.408682	0.586734	0.746008	0.630304	0.449758	0.58598	0.830093	1.25729	1.15101	0.725609	0.833718	0.96094	1.0067	0.990486
0.939727	0.691949	1.08318	1.63419	1.2391	0.982162	0.723281	1.05974	1.24133	0.932864	0.576204	0.406923	0.586806	0.744252	0.629552	0.446574	0.586971	0.831749	1.24824	1.14561	0.725435	0.837274	0.958293	1.00749	0.993887
0.946394	0.691622	1.08426	1.58971	1.24006	0.981493	0.721445	1.05859	1.248	0.935231	0.575436	0.40508	0.586109	0.742279	0.628325	0.443525	0.587473	0.83186	1.23376	1.13921	0.725406	0.840386	0.954812	1.00835	0.997883
0.953061	0.692312	1.08558	1.55719	1.24074	0.980376	0.719226	1.05811	1.25561	0.936001	0.575301	0.403019	0.584819	0.740768	0.626468	0.440774	0.586987	0.83079	1.21638	1.12992	0.725455	0.842784	0.952071	1.00847	1.0025
0.959728	0.693664	1.08699	1.53811	1.24044	0.978919	0.716485	1.05848	1.26406	0.934676	0.575886	0.400699	0.583219	0.740123	0.624054	0.438396	0.585039	0.829461	1.19709	1.11556	0.725578	0.844414	0.951452	1.00769	1.00667
0.966394	0.695393	1.08829	1.53326	1.23893	0.97737	0.713206	1.05965	1.27291	0.93171	0.577323	0.39818	0.581532	0.740269	0.621241	0.436319	0.581411	0.828801	1.17592	1.09488	0.725757	0.845337	0.953409	1.00678	1.00786
0.973061	0.697201	1.08937	1.5426	1.23665	0.976025	0.709506	1.06137	1.28145	0.928292	0.579673	0.395631	0.579879	0.740755	0.618117	0.434287	0.576292	0.82936	1.15324	1.06912	0.725894	0.845567	0.957465	1.00701	1.00268
0.979728	0.69875	1.09021	1.56478	1.23454	0.975083	0.705579	1.06334	1.28907	0.925838	0.582792	0.393286	0.578241	0.741025	0.614689	0.431948	0.570127	0.831171	1.1308	1.04241	0.725836	0.845047	0.962689	1.00933	0.989189
0.986394	0.699746	1.09093	1.59686	1.23357	0.974575	0.701622	1.06519	1.29559	0.925456	0.586285	0.391343	0.57646	0.740666	0.610967	0.429041	0.563348	0.833868	1.11154	1.0203	0.725458	0.8438	0.967807	1.01365	0.969049
0.993061	0.700043	1.09169	1.63477	1.23431	0.974365	0.697769	1.06664	1.30119	0.927567	0.589578	0.389851	0.574309	0.739554	0.607051	0.425589	0.556278	0.836919	1.09854	1.00773	0.724748	0.842096	0.971224	1.01885	0.947095
0.999728	0.699695	1.09265	1.67445	1.23668	0.97422	0.694038	1.06748	1.30627	0.931775	0.592046	0.388685	0.571626	0.737845	0.60316	0.421913	0.549187	0.839883	1.09394	1.00758	0.723821	0.840465	0.971846	1.0234	0.928897
1.00639	0.69892	1.09392	1.71269	1.24008	0.973888	0.690364	1.0676	1.31127	0.936955	0.593204	0.387608	0.568438	0.73585	0.599601	0.418477	0.542311	0.842524	1.09829	1.02028	0.722878	0.839548	0.969667	1.02611	0.918573
1.01306	0.698027	1.09562	1.7468	1.24373	0.973191	0.686685	1.06702	1.31647	0.94166	0.592889	0.386376	0.564966	0.733827	0.596707	0.4157	0.535786	0.844745	1.11041	1.0438	0.722119	0.839902	0.965345	1.02666	0.917924
1.01973	0.697299	1.09782	1.77364	1.2469	0.972064	0.683045	1.06585	1.32187	0.944828	0.591303	0.384802	0.561521	0.731862	0.594713	0.413839	0.529623	0.84649	1.12765	1.074	0.721659	0.841842	0.959685	1.02583	0.926534
1.02639	0.6969	1.10063	1.78953	1.24908	0.970572	0.679576	1.06431	1.32712	0.946443	0.588888	0.382803	0.558353	0.729904	0.593664	0.412951	0.52374	0.847725	1.14666	1.1054	0.721487	0.845315	0.953639	1.02522	0.942312
1.03306	0.696847	1.10406	1.79156	1.25012	0.968855	0.67637	1.06265	1.33181	0.9476	0.586128	0.380433	0.55558	0.727949	0.593386	0.412892	0.518051	0.848498	1.16441	1.13251	0.721525	0.849877	0.94844	1.02614	0.961973
1.03973	0.697024	1.10807	1.77896	1.25017	0.967086	0.673362	1.06106	1.3357	0.949802	0.583433	0.377906	0.553194	0.726163	0.593541	0.413358	0.512534	0.848973	1.17896	1.15165	0.721677	0.854765	0.945343	1.0286	0.981445
1.04639	0.697245	1.11246	1.75357	1.24962	0.965409	0.67033	1.0597	1.33887	0.95401	0.581082	0.375555	0.55114	0.724834	0.593776	0.413986	0.507255	0.849405	1.18967	1.16191	0.721854	0.859101	0.945042	1.03155	0.996915
1.05306	0.697312	1.11693	1.71938	1.24887	0.963892	0.667011	1.05858	1.34176	0.960165	0.579185	0.373741	0.549369	0.724176	0.593853	0.414474	0.502339	0.850045	1.19682	1.16477	0.721955	0.862155	0.947335	1.03381	1.00647
1.05973	0.697061	1.12114	1.68195	1.24819	0.962525	0.663234	1.05767	1.34505	0.96737	0.577673	0.372749	0.547876	0.724146	0.593726	0.414637	0.497914	0.851048	1.20101	1.16263	0.721892	0.863575	0.951221	1.03452	1.0107
1.06639	0.696381	1.12484	1.6476	1.2478	0.961272	0.658987	1.05689	1.34941	0.974454	0.576357	0.372705	0.546685	0.724413	0.593497	0.414397	0.494069	0.852427	1.20281	1.15752	0.721611	0.863505	0.955287	1.03318	1.0116
1.07306	0.695228	1.12793	1.62238	1.24793	0.960129	0.654416	1.05619	1.35534	0.9805	0.575001	0.37355	0.545815	0.724491	0.593328	0.41376	0.490862	0.85404	1.2026	1.15063	0.721106	0.862517	0.958451	1.0298	1.01114
1.07973	0.693616	1.13046	1.61084	1.2489	0.95917	0.649783	1.05556	1.36299	0.985176	0.573404	0.375074	0.545222	0.723956	0.593348	0.412795	0.488338	0.855625	1.20074	1.14251	0.72044	0.861396	0.960605	1.02503	1.01053
1.08639	0.691605	1.13258	1.61505	1.25101	0.958533	0.645392	1.05501	1.3721	0.988816	0.571445	0.376973	0.544759	0.722597	0.593621	0.411612	0.486538	0.85689	1.19764	1.13356	0.719772	0.860855	0.96252	1.01996	1.0101
1.09306	0.68928	1.13446	1.63423	1.25441	0.958394	0.641521	1.0545	1.38202	0.992227	0.569096	0.378902	0.544181	0.720448	0.594136	0.41035	0.485492	0.857618	1.19384	1.12421	0.719372	0.861342	0.965046	1.01558	1.00962
1.09973	0.686736	1.13626	1.66465	1.25895	0.958898	0.638347	1.05394	1.39193	0.99632	0.566412	0.380524	0.543213	0.717718	0.594823	0.409169	0.485198	0.85777	1.1899	1.11504	0.719567	0.862949	0.968345	1.0122	1.00883
1.1064	0.684082	1.13807	1.70002	1.2642	0.960102	0.635918	1.05322	1.40114	1.0017	0.563523	0.381547	0.541649	0.714694	0.59558	0.408224	0.485604	0.857504	1.18626	1.10662	0.720603	0.86543	0.97172	1.00947	1.00768
1.11306	0.681451	1.13996	1.73194	1.26953	0.961925	0.634168	1.05222	1.40934	1.00837	0.560603	0.381775	0.539435	0.711635	0.596288	0.407639	0.48659	0.857117	1.18325	1.09935	0.722485	0.868287	0.97421	1.00686	1.00641
1.11973	0.679002	1.14192	1.75107	1.27428	0.964154	0.632952	1.05093	1.41662	1.01572	0.55786	0.381142	0.536696	0.708689	0.596815	0.407466	0.487982	0.856946	1.18114	1.09351	0.724908	0.870897	0.97544	1.00416	1.00536
1.1264	0.676887	1.14388	1.74929	1.27796	0.966485	0.632112	1.0494	1.42333	1.02274	0.555502	0.379719	0.533686	0.705879	0.597009	0.40767	0.489589	0.857266	1.18026	1.08926	0.727328	0.872667	0.975841	1.00167	1.00481
1.13306	0.675195	1.14574	1.72259	1.28036	0.968592	0.631503	1.04773	1.42983	1.02854	0.553702	0.37768	0.530688	0.70315	0.596703	0.408128	0.491242	0.85822	1.18099	1.08673	0.729162	0.873178	0.976053	1.00003	1.00488
1.13973	0.673908	1.14743	1.67305	1.28162	0.970197	0.631022	1.04603	1.43643	1.0327	0.552549	0.375234	0.527931	0.700477	0.595761	0.408657	0.49278	0.859794	1.18362	1.08606	0.730022	0.872292	0.97637	0.999842	1.00545
1.1464	0.67291	1.14894	1.60808	1.28209	0.971125	0.630635	1.04441	1.44326	1.03553	0.551984	0.372564	0.525544	0.697941	0.594146	0.409047	0.494004	0.861834	1.18816	1.08732	0.729857	0.870202	0.976688	1.00131	1.00618
1.15306	0.672037	1.15037	1.5373	1.28223	0.971339	0.630378	1.04289	1.4503	1.03796	0.551768	0.369792	0.52357	0.695743	0.591974	0.409103	0.494682	0.86411	1.19425	1.09037	0.728955	0.867409	0.976732	1.00411	1.00659
1.15973	0.671141	1.15186	1.4693	1.28239	0.970934	0.630331	1.0415	1.45746	1.04116	0.551527	0.366977	0.522008	0.694146	0.589521	0.408664	0.494644	0.866398	1.20123	1.09483	0.727793	0.864564	0.976264	1.00758	1.00621
1.1664	0.670126	1.15361	1.41004	1.28274	0.970101	0.630549	1.0402	1.4646	1.04616	0.550868	0.364128	0.520828	0.69336	0.587148	0.407621	0.493962	0.868536	1.20835	1.10007	0.726851	0.862226	0.975218	1.01104	1.00492
1.17306	0.668955	1.15584	1.36285	1.28324	0.96906	0.630999	1.03891	1.4716	1.05349	0.549514	0.361233	0.519962	0.693442	0.585187	0.405912	0.493017	0.870419	1.21492	1.10527	0.726458	0.860651	0.973762	1.01397	1.00297
1.17973	0.667621	1.15874	1.32914	1.28367	0.967998	0.631558	1.03753	1.47846	1.06301	0.547398	0.358289	0.519283	0.694245	0.583842	0.403545	0.492381	0.871966	1.22052	1.10963	0.726719	0.859754	0.972191	1.01603	1.00099
1.1864	0.666133	1.16243	1.30926	1.2837	0.967025	0.632065	1.03595	1.48535	1.07396	0.544678	0.355333	0.518627	0.695436	0.583165	0.400618	0.492524	0.873134	1.22503	1.11246	0.727525	0.859215	0.970733	1.01713	0.999664
1.19306	0.664501	1.16692	1.30317	1.28303	0.96615	0.632391	1.03404	1.49257	1.08536	0.541687	0.35245	0.517828	0.696611	0.583109	0.397328	0.493595	0.873959	1.2286	1.11337	0.728625	0.858642	0.969472	1.01748	0.999477
1.19973	0.662738	1.17206	1.31087	1.28149	0.965301	0.63249	1.03172	1.50049	1.0964	0.538824	0.349778	0.516752	0.697415	0.583589	0.393953	0.49542	0.874547	1.23159	1.11229	0.729713	0.857687	0.968378	1.01767	1.00058
1.2064	0.660862	1.17758	1.33252	1.2791	0.964352	0.632405	1.02891	1.50946	1.10676	0.53645	0.347475	0.515299	0.697638	0.58452	0.39079	0.497676	0.874994	1.23443	1.10949	0.730516	0.856112	0.967427	1.01818	1.00282
1.21306	0.658905	1.18312	1.36834	1.2761	0.963176	0.632234	1.0256	1.51963	1.11665	0.534803	0.345676	0.513413	0.69725	0.585807	0.388072	0.500035	0.875322	1.23748	1.10543	0.730845	0.853817	0.966679	1.01895	1.00582
1.21973	0.656912	1.1884	1.41831	1.27284	0.961691	0.632081	1.02184	1.53084	1.12661	0.53397	0.344443	0.511081	0.69636	0.587327	0.385917	0.502246	0.875478	1.24101	1.10071	0.730612	0.850845	0.966304	1.01969	1.00906
1.2264	0.654946	1.1932	1.48165	1.26973	0.959888	0.632013	1.01777	1.54269	1.13719	0.533891	0.343739	0.508344	0.695148	0.58892	0.384307	0.504162	0.875373	1.24506	1.0959	0.729814	0.847391	0.966499	1.02049	1.01202
1.23306	0.653084	1.19745	1.55619	1.26707	0.957827	0.632053	1.0136	1.55459	1.14871	0.534399	0.34342	0.505291	0.693813	0.59042	0.383123	0.505735	0.874961	1.24953	1.09145	0.728509	0.84376	0.967336	1.02186	1.01431
1.23973	0.651404	1.2012	1.63771	1.26496	0.9556	0.63218	1.00959	1.56603	1.16108	0.535257	0.343264	0.502045	0.692515	0.591684	0.382206	0.506996	0.874288	1.25413	1.08768	0.726807	0.840298	0.968689	1.0241	1.01573
1.2464	0.649975	1.20451	1.71955	1.26331	0.953286	0.632346	1.006	1.57669	1.17374	0.536214	0.343023	0.498757	0.691354	0.592615	0.381413	0.508014	0.873502	1.2586	1.08475	0.724902	0.837294	0.970264	1.02687	1.01621
1.25306	0.648833	1.20749	1.79327	1.26184	0.950927	0.632484	1.00298	1.58656	1.1858	0.537061	0.342475	0.495584	0.690355	0.593169	0.380666	0.508858	0.872799	1.26274	1.08267	0.7231	0.834914	0.971685	1.02924	1.01571
1.25973	0.647969	1.2102	1.8504	1.26022	0.948533	0.632528	1.00057	1.59601	1.1964	0.53767	0.34146	0.492679	0.689473	0.593357	0.379953	0.509577	0.872342	1.26656	1.08143	0.721794	0.833175	0.972607	1.03033	1.01424
1.2664	0.647314	1.21267	1.88519	1.25821	0.946113	0.632437	0.9987	1.60559	1.20525	0.538008	0.339899	0.490175	0.688612	0.593259	0.379312	0.510209	0.872226	1.27036	1.08101	0.72137	0.831982	0.972845	1.02974	1.01194
1.27306	0.646749	1.21496	1.89661	1.2557	0.9437	0.632223	0.997156	1.61588	1.21325	0.538108	0.337785	0.488176	0.687639	0.593021	0.37878	0.510797	0.872488	1.27464	1.08143	0.722098	0.831194	0.972474	1.02759	1.00907
1.27973	0.646146	1.21716	1.88853	1.25278	0.941375	0.631961	0.99569	1.62723	1.22265	0.538028	0.335177	0.486748	0.686403	0.592846	0.37835	0.511412	0.873147	1.28001	1.08275	0.724051	0.830687	0.971827	1.0244	1.00605
1.2864	0.6454	1.21936	1.86798	1.24973	0.939245	0.631756	0.994054	1.63965	1.23597	0.537817	0.332191	0.485922	0.684749	0.592969	0.377953	0.512161	0.874247	1.28704	1.08503	0.727078	0.830384	0.971319	1.02105	1.00329
1.29306	0.644468	1.2217	1.84287	1.24694	0.937434	0.631708	0.992064	1.65287	1.2542	0.537503	0.328984	0.485691	0.682541	0.593613	0.377474	0.513175	0.875863	1.29608	1.0883	0.730835	0.83026	0.971224	1.01853	1.00115
1.29973	0.643378	1.22429	1.82003	1.24479	0.936031	0.63186	0.989623	1.66655	1.27598	0.537101	0.325725	0.486012	0.679693	0.594951	0.376819	0.514582	0.87807	1.30724	1.09251	0.734861	0.830312	0.971612	1.01741	0.999821
1.3064	0.64221	1.22716	1.80418	1.24361	0.93507	0.632184	0.986727	1.68047	1.29853	0.53663	0.322581	0.486803	0.676207	0.597063	0.375979	0.516457	0.880908	1.32033	1.09748	0.738662	0.830526	0.972432	1.01775	0.999323
1.31306	0.641065	1.23029	1.79738	1.24357	0.934498	0.632574	0.983437	1.69452	1.31911	0.536121	0.319688	0.48795	0.672188	0.599913	0.37505	0.518792	0.884346	1.33489	1.10291	0.741792	0.830851	0.973552	1.01926	0.999523
1.31973	0.640031	1.23353	1.79888	1.24473	0.934188	0.632884	0.979851	1.70873	1.33588	0.535631	0.317146	0.489315	0.667831	0.603352	0.374194	0.521477	0.888262	1.35031	1.10836	0.743878	0.831183	0.974762	1.02153	1.00019
1.3264	0.639169	1.23673	1.80508	1.24699	0.933967	0.632955	0.976086	1.72317	1.348	0.535238	0.315014	0.490742	0.663383	0.607145	0.373572	0.524335	0.892446	1.36593	1.11334	0.744669	0.831363	0.97585	1.02403	1.00106
1.33306	0.638501	1.23975	1.80999	1.25019	0.933659	0.632651	0.972266	1.73799	1.35534	0.535053	0.313296	0.492076	0.659103	0.611024	0.373307	0.527177	0.896616	1.38119	1.1174	0.74409	0.831208	0.976732	1.02628	1.00194
1.33973	0.638024	1.24249	1.80635	1.25408	0.933135	0.631869	0.968531	1.75342	1.35811	0.535213	0.31195	0.493171	0.65522	0.614744	0.373455	0.529841	0.900465	1.39577	1.12023	0.742274	0.830547	0.977477	1.02809	1.00269
1.3464	0.637724	1.24496	1.78768	1.25846	0.932343	0.630546	0.965023	1.76978	1.35676	0.535857	0.310895	0.4939	0.651892	0.618118	0.374006	0.532207	0.903711	1.40965	1.12169	0.739523	0.829274	0.978251	1.02962	1.00327
1.35306	0.637584	1.24722	1.75051	1.26314	0.931314	0.628651	0.96189	1.78746	1.35186	0.537075	0.31003	0.494165	0.649195	0.621023	0.374887	0.534177	0.906156	1.42309	1.12187	0.736238	0.82737	0.979163	1.03125	1.00374
1.35973	0.637589	1.24935	1.69584	1.26799	0.930142	0.626184	0.959259	1.8068	1.34426	0.538867	0.309252	0.493904	0.64711	0.623409	0.375971	0.535676	0.907715	1.4365	1.12096	0.73284	0.824921	0.980195	1.03329	1.00416
1.3664	0.637723	1.25144	1.6288	1.27299	0.928941	0.623188	0.957232	1.82806	1.33513	0.541133	0.308484	0.493085	0.645534	0.625272	0.377103	0.536664	0.908428	1.45023	1.11929	0.729692	0.822089	0.981221	1.03585	1.00465
1.37306	0.63796	1.25353	1.55664	1.27818	0.927816	0.619752	0.95585	1.85135	1.32598	0.543695	0.307683	0.491715	0.644303	0.626638	0.378124	0.537166	0.908437	1.46441	1.11716	0.727061	0.819079	0.982104	1.03884	1.00533
1.37973	0.638258	1.25562	1.48639	1.28361	0.926838	0.616019	0.955085	1.87657	1.31835	0.546354	0.30685	0.489827	0.643227	0.627533	0.378897	0.53729	0.907944	1.47879	1.11488	0.725102	0.816096	0.982781	1.04208	1.00626
1.3864	0.638558	1.25767	1.42332	1.28935	0.926056	0.612176	0.954845	1.90339	1.31325	0.548935	0.306018	0.487486	0.642126	0.627973	0.379336	0.537217	0.907161	1.49273	1.11269	0.72386	0.813314	0.983233	1.04538	1.00745
1.39306	0.638789	1.25964	1.3706	1.29539	0.925502	0.608428	0.954973	1.93132	1.31078	0.551316	0.305236	0.484773	0.640875	0.62796	0.379417	0.537161	0.906274	1.50537	1.11077	0.7233	0.810868	0.983435	1.04846	1.00887
1.39973	0.638877	1.26151	1.32962	1.30165	0.925205	0.604976	0.955285	1.9597	1.31029	0.553444	0.304554	0.481782	0.63942	0.62749	0.379171	0.537325	0.905425	1.5159	1.10923	0.723326	0.808846	0.983369	1.05098	1.01048
1.4064	0.638755	1.26332	1.3007	1.30789	0.925181	0.601985	0.955595	1.98776	1.31105	0.555322	0.303999	0.478608	0.637783	0.62657	0.378658	0.537843	0.904718	1.52383	1.10813	0.723796	0.807306	0.983078	1.05274	1.01231
1.41306	0.638382	1.26515	1.28362	1.3138	0.925417	0.59956	0.955743	2.0147	1.31267	0.556991	0.303568	0.475341	0.636041	0.625227	0.377949	0.538733	0.904232	1.52918	1.10746	0.724545	0.806278	0.982729	1.05387	1.01442
1.41973	0.637756	1.26713	1.27806	1.31904	0.925856	0.597726	0.955619	2.03973	1.31505	0.558517	0.303222	0.472057	0.634296	0.623503	0.3771	0.539887	0.904036	1.5325	1.10717	0.725397	0.80577	0.982577	1.05478	1.01679
1.4264	0.636925	1.26942	1.28373	1.32329	0.926405	0.596432	0.955169	2.0622	1.31813	0.559973	0.302903	0.468827	0.632637	0.621439	0.376153	0.541076	0.904206	1.5347	1.10718	0.726214	0.805764	0.982843	1.05587	1.01927
1.43306	0.635973	1.27216	1.30039	1.32634	0.926944	0.595565	0.954391	2.08168	1.32168	0.561433	0.302546	0.465723	0.631119	0.619062	0.37514	0.542	0.904811	1.53685	1.1074	0.726928	0.80621	0.983569	1.05726	1.02158
1.43973	0.635015	1.27546	1.32779	1.32813	0.927351	0.594968	0.953327	2.09808	1.32537	0.562967	0.3021	0.462818	0.629763	0.616385	0.374098	0.542351	0.905924	1.53995	1.10784	0.727559	0.807025	0.984634	1.05881	1.02349
1.4464	0.634171	1.27935	1.36547	1.32878	0.927534	0.594469	0.952037	2.11167	1.32887	0.564622	0.301544	0.460179	0.628556	0.613417	0.373082	0.541886	0.90759	1.54479	1.10853	0.728192	0.808094	0.985868	1.06035	1.02485
1.45306	0.633545	1.28381	1.41252	1.32854	0.927444	0.593908	0.950596	2.12309	1.33201	0.566422	0.300892	0.457858	0.627472	0.610189	0.372167	0.540502	0.909816	1.55179	1.10954	0.728931	0.809283	0.987174	1.06162	1.02571
1.45973	0.633214	1.28873	1.46736	1.32774	0.927091	0.593166	0.949073	2.13327	1.33478	0.568349	0.300191	0.455876	0.626484	0.606762	0.371449	0.538279	0.912552	1.56091	1.11094	0.729857	0.810451	0.98852	1.06232	1.02622
1.4664	0.63322	1.29397	1.52751	1.32675	0.926539	0.592176	0.947545	2.14323	1.33729	0.570354	0.299514	0.454224	0.625583	0.60323	0.371026	0.535472	0.915695	1.57168	1.11277	0.730997	0.811471	0.989887	1.06219	1.02659
1.47306	0.633573	1.29936	1.58949	1.32586	0.925888	0.590936	0.94609	2.15399	1.33973	0.57236	0.298941	0.45286	0.624777	0.599701	0.370975	0.532456	0.919088	1.58325	1.11503	0.732307	0.81225	0.991208	1.06112	1.02704
1.47973	0.634255	1.30474	1.64911	1.32525	0.925256	0.58949	0.944797	2.16643	1.34224	0.574287	0.298545	0.45172	0.624091	0.596276	0.371335	0.529639	0.922541	1.59458	1.11769	0.733682	0.812743	0.992383	1.0592	1.02768
1.4864	0.63523	1.30997	1.70204	1.32498	0.924747	0.587917	0.94375	2.18125	1.34489	0.576065	0.298368	0.45072	0.623544	0.593025	0.372088	0.527377	0.925867	1.6047	1.12063	0.734977	0.812968	0.993312	1.05666	1.02854
1.49306	0.636456	1.3149	1.74486	1.32497	0.924437	0.586306	0.943023	2.19894	1.34771	0.577649	0.298412	0.449764	0.623138	0.58999	0.373159	0.525927	0.928903	1.61289	1.12375	0.736049	0.812996	0.993909	1.05382	1.02958
1.49973	0.637889	1.31945	1.77593	1.3251	0.924359	0.584738	0.942663	2.21971	1.35067	0.579018	0.298632	0.44876	0.622836	0.587193	0.374422	0.525407	0.931544	1.61877	1.1269	0.736805	0.812948	0.994131	1.05103	1.03074
1.5064	0.639493	1.32354	1.79572	1.32519	0.924503	0.583278	0.942677	2.24348	1.35376	0.580178	0.298946	0.447629	0.622562	0.58467	0.375731	0.525795	0.933759	1.62229	1.1299	0.737232	0.812966	0.994006	1.04857	1.03196
1.51306	0.641242	1.32716	1.80645	1.32512	0.92482	0.581969	0.943026	2.26984	1.35701	0.581161	0.299248	0.446319	0.622211	0.582492	0.376946	0.526938	0.935589	1.62365	1.13261	0.737403	0.813186	0.993676	1.04655	1.03312
1.51973	0.643124	1.33032	1.81112	1.32485	0.925247	0.580828	0.943622	2.29804	1.3605	0.582026	0.299437	0.444815	0.621683	0.58078	0.377969	0.528582	0.93713	1.62323	1.13487	0.737455	0.813713	0.993357	1.0449	1.03411
1.5264	0.645128	1.3331	1.81267	1.32443	0.925713	0.579849	0.944341	2.32714	1.36428	0.582849	0.299438	0.443141	0.620916	0.579701	0.378771	0.530418	0.938514	1.6215	1.1366	0.737542	0.814598	0.993246	1.04348	1.03476
1.53306	0.647246	1.33559	1.81325	1.324	0.926161	0.579007	0.945035	2.35617	1.36839	0.583723	0.299212	0.441359	0.619909	0.579437	0.379392	0.532143	0.939869	1.61902	1.13774	0.737797	0.815835	0.993433	1.04214	1.03498
1.53973	0.649455	1.33791	1.81387	1.32373	0.926555	0.578266	0.945552	2.38428	1.37284	0.584745	0.298768	0.439556	0.618718	0.580157	0.379929	0.533512	0.941317	1.61635	1.13834	0.738306	0.81735	0.993891	1.04075	1.03474
1.5464	0.651717	1.34022	1.81439	1.32384	0.926891	0.577585	0.945759	2.41094	1.37756	0.585997	0.298149	0.437831	0.617441	0.581978	0.380506	0.53438	0.942945	1.61405	1.13851	0.739109	0.81902	0.994533	1.03914	1.03414
1.55306	0.653978	1.34262	1.81352	1.32449	0.92719	0.576939	0.945557	2.43592	1.38244	0.587528	0.297422	0.436277	0.616195	0.584942	0.38124	0.534723	0.944805	1.61259	1.1384	0.740203	0.820686	0.99525	1.03714	1.03334
1.55973	0.656178	1.34525	1.80917	1.3258	0.927491	0.576316	0.944898	2.45934	1.38737	0.589346	0.296656	0.434966	0.615088	0.589006	0.382212	0.534625	0.946912	1.61231	1.13817	0.741563	0.822173	0.995922	1.03472	1.03254
1.5664	0.658272	1.34819	1.79886	1.3278	0.927838	0.575736	0.943773	2.48158	1.39228	0.59141	0.295914	0.433945	0.614209	0.594043	0.383462	0.534246	0.949236	1.61338	1.13802	0.743138	0.823323	0.996408	1.03201	1.0319
1.57306	0.660243	1.35148	1.78038	1.33042	0.928267	0.575239	0.942218	2.50326	1.39715	0.593639	0.295233	0.433239	0.613615	0.599848	0.384985	0.533782	0.951713	1.61583	1.13809	0.744865	0.824007	0.996565	1.02943	1.03153
1.57973	0.662114	1.35516	1.75253	1.33355	0.928799	0.574884	0.940298	2.52516	1.40204	0.595929	0.294627	0.432859	0.613317	0.606167	0.386749	0.533417	0.954258	1.61956	1.13848	0.746657	0.82414	0.996301	1.02756	1.03148
1.5864	0.663954	1.35922	1.71548	1.33699	0.929433	0.574726	0.938095	2.54812	1.40707	0.598167	0.294082	0.432808	0.61329	0.612712	0.3887	0.533289	0.956775	1.62446	1.13919	0.748415	0.823687	0.995622	1.02701	1.03177
1.59306	0.665864	1.36362	1.67093	1.34053	0.930157	0.574809	0.935697	2.57293	1.41237	0.600246	0.29356	0.433085	0.613473	0.619205	0.390777	0.533467	0.959173	1.63043	1.14016	0.750039	0.822658	0.994627	1.02812	1.03239
1.59973	0.66796	1.36826	1.62161	1.34395	0.93095	0.575149	0.933191	2.60025	1.41808	0.602084	0.293008	0.433679	0.613788	0.625406	0.392925	0.533958	0.961376	1.63741	1.14124	0.75145	0.821101	0.993452	1.03092	1.03329
1.6064	0.670344	1.37307	1.57068	1.34706	0.931787	0.575737	0.930658	2.63052	1.42427	0.603626	0.292362	0.434565	0.614157	0.631141	0.395095	0.534719	0.963323	1.64541	1.1422	0.752606	0.819092	0.992213	1.0351	1.03448
1.61306	0.67309	1.37793	1.5212	1.34974	0.932648	0.576533	0.928159	2.66398	1.43096	0.604853	0.291563	0.435705	0.614523	0.636319	0.397249	0.535685	0.964977	1.6545	1.14279	0.753515	0.816734	0.990989	1.04023	1.03594
1.61973	0.676207	1.38275	1.4758	1.35192	0.933528	0.577477	0.925742	2.70069	1.43811	0.605773	0.290566	0.43705	0.614853	0.640916	0.399365	0.536785	0.966336	1.66473	1.14279	0.754229	0.81415	0.989841	1.04588	1.03769
1.6264	0.679649	1.38744	1.4365	1.35356	0.93443	0.5785	0.923438	2.74057	1.44564	0.606421	0.289343	0.438544	0.615142	0.644947	0.401423	0.537958	0.96744	1.67614	1.14201	0.754838	0.811479	0.988851	1.05176	1.0397
1.63306	0.683305	1.39195	1.40479	1.35467	0.93537	0.579533	0.921263	2.78352	1.45347	0.606839	0.287896	0.440122	0.615412	0.648441	0.403411	0.539141	0.968368	1.68874	1.14038	0.755445	0.808869	0.988137	1.05764	1.04191
1.63973	0.687023	1.3962	1.38167	1.3553	0.936374	0.580518	0.91922	2.82935	1.46147	0.607071	0.286249	0.441719	0.6157	0.651414	0.405306	0.540274	0.96922	1.70255	1.13795	0.756167	0.806474	0.98784	1.06326	1.04421
1.6464	0.690637	1.40018	1.36774	1.3555	0.937473	0.581422	0.917313	2.87789	1.46956	0.607153	0.284449	0.443272	0.616053	0.65386	0.407068	0.541288	0.970084	1.71755	1.1349	0.757114	0.804434	0.988091	1.06825	1.04647
1.65306	0.693996	1.40387	1.36328	1.35533	0.938702	0.582234	0.915544	2.92885	1.47767	0.607111	0.28256	0.444732	0.616523	0.655748	0.408639	0.542115	0.971029	1.73372	1.13151	0.758387	0.802859	0.988977	1.07229	1.04854
1.65973	0.696994	1.40725	1.36819	1.35487	0.940092	0.582977	0.913925	2.98191	1.48576	0.606954	0.280659	0.446067	0.617155	0.657037	0.409943	0.542686	0.972091	1.75107	1.12817	0.760074	0.801821	0.990524	1.07518	1.05034
1.6664	0.699587	1.41036	1.38204	1.35421	0.941673	0.583698	0.912475	3.03664	1.49384	0.606688	0.278825	0.44727	0.617985	0.657683	0.410899	0.542947	0.973271	1.76956	1.12532	0.762233	0.801341	0.992675	1.07699	1.05179
1.67306	0.701799	1.41324	1.4039	1.35345	0.943474	0.584466	0.911222	3.09256	1.50197	0.606315	0.277137	0.44836	0.619035	0.657656	0.41144	0.542867	0.974548	1.78915	1.12341	0.76489	0.801389	0.995317	1.07807	1.05286
1.67973	0.703706	1.41596	1.43231	1.35268	0.945517	0.585365	0.910197	3.14915	1.51025	0.60584	0.275667	0.449373	0.620313	0.656952	0.411532	0.542449	0.975879	1.80979	1.12281	0.768035	0.801888	0.9983	1.07883	1.05355
1.6864	0.705426	1.41864	1.4651	1.35199	0.947816	0.58648	0.909425	3.20597	1.51878	0.60527	0.274468	0.45036	0.62182	0.655593	0.411178	0.541729	0.977204	1.83141	1.12382	0.77162	0.802721	1.00146	1.07968	1.05386
1.69306	0.707087	1.42137	1.49946	1.35147	0.95037	0.587893	0.908926	3.2627	1.52769	0.604626	0.273579	0.451371	0.623547	0.653629	0.410423	0.54078	0.978458	1.85396	1.12659	0.775566	0.803747	1.00464	1.08089	1.0538
1.69973	0.708806	1.4243	1.53209	1.35117	0.953159	0.589665	0.908701	3.3192	1.53704	0.603935	0.273011	0.452446	0.625483	0.65113	0.409339	0.539704	0.979576	1.87736	1.13113	0.77977	0.804815	1.00765	1.08255	1.05341
1.7064	0.710675	1.4275	1.55971	1.3511	0.956135	0.591835	0.908735	3.37549	1.54688	0.603233	0.272756	0.453612	0.627608	0.648186	0.408016	0.538629	0.980504	1.90159	1.13728	0.784103	0.80578	1.01032	1.08461	1.05266
1.71307	0.71275	1.43108	1.5796	1.35125	0.959225	0.594407	0.908999	3.43171	1.55717	0.602565	0.272784	0.454872	0.629899	0.644894	0.40655	0.537705	0.981212	1.9266	1.14473	0.788413	0.806524	1.01252	1.08692	1.05156
1.71973	0.715052	1.43507	1.59024	1.35158	0.962332	0.597351	0.909451	3.48801	1.56779	0.601978	0.273049	0.456213	0.632324	0.641357	0.405038	0.5371	0.981694	1.95238	1.15307	0.792523	0.806979	1.01414	1.0893	1.05009
1.7264	0.717583	1.4395	1.59165	1.35204	0.965347	0.600597	0.910038	3.54452	1.57858	0.601521	0.273492	0.457609	0.634844	0.637679	0.403575	0.536998	0.98198	1.9789	1.16182	0.79624	0.807149	1.01512	1.09162	1.04827
1.73307	0.720332	1.44437	1.58533	1.35256	0.968163	0.604032	0.910707	3.60137	1.58935	0.601237	0.274053	0.459018	0.637419	0.633966	0.402246	0.537585	0.982139	2.00616	1.17054	0.799363	0.807109	1.01547	1.09373	1.04614
1.73973	0.723296	1.44966	1.57373	1.35311	0.970698	0.60751	0.911403	3.65871	1.59989	0.601164	0.274673	0.460398	0.640008	0.630327	0.401126	0.53905	0.982268	2.03411	1.17881	0.801712	0.807001	1.01529	1.09555	1.04377
1.7464	0.726484	1.45531	1.5597	1.35366	0.972914	0.610858	0.912066	3.71682	1.61002	0.60133	0.275303	0.461705	0.642572	0.626872	0.400269	0.541561	0.982485	2.06271	1.18635	0.803159	0.806989	1.01478	1.09699	1.04121
1.75307	0.729917	1.4613	1.54583	1.35426	0.974825	0.613894	0.912645	3.77611	1.61962	0.601752	0.275906	0.462899	0.645081	0.623708	0.399712	0.545244	0.982917	2.09189	1.19299	0.803658	0.807224	1.0142	1.09808	1.03854
1.75973	0.733614	1.46756	1.53417	1.35497	0.976502	0.616439	0.913085	3.83708	1.62863	0.602447	0.276461	0.463951	0.647505	0.620936	0.399466	0.550165	0.983678	2.12157	1.19864	0.803259	0.807814	1.01382	1.09894	1.03582
1.7664	0.737579	1.47406	1.52595	1.3559	0.978058	0.618344	0.913334	3.90025	1.63706	0.603422	0.276958	0.464842	0.649824	0.618639	0.399524	0.556303	0.984855	2.15165	1.20335	0.802097	0.808809	1.01383	1.09985	1.03314
1.77307	0.741783	1.48075	1.52154	1.35717	0.979634	0.619502	0.913346	3.96602	1.64501	0.604681	0.2774	0.465563	0.652016	0.616884	0.399863	0.563541	0.98649	2.18205	1.20724	0.800368	0.810205	1.01435	1.10111	1.0306
1.77973	0.746151	1.48759	1.52057	1.35894	0.981373	0.619859	0.913087	4.0346	1.65261	0.606218	0.277797	0.466116	0.654069	0.615709	0.400446	0.571661	0.98858	2.21273	1.21047	0.798285	0.81195	1.0154	1.10296	1.02831
1.7864	0.75056	1.49455	1.52194	1.36131	0.983402	0.619419	0.912531	4.10608	1.66009	0.60802	0.278165	0.466512	0.655975	0.615135	0.401229	0.580362	0.991064	2.24373	1.21324	0.796052	0.813963	1.01692	1.10552	1.02638
1.79307	0.75485	1.50161	1.52409	1.3644	0.98582	0.61824	0.911676	4.18043	1.66766	0.610058	0.278524	0.466768	0.657737	0.61516	0.402165	0.589282	0.993843	2.27518	1.21577	0.793843	0.816142	1.01884	1.10877	1.02487
1.79973	0.758835	1.50876	1.52521	1.36828	0.9887	0.616426	0.910532	4.25767	1.67553	0.612288	0.278891	0.466903	0.659369	0.615764	0.403209	0.598022	0.996783	2.3074	1.21829	0.791798	0.81838	1.02102	1.11261	1.02381
1.8064	0.762323	1.516	1.52357	1.37298	0.992091	0.614106	0.90913	4.33785	1.68386	0.614651	0.279282	0.466939	0.660897	0.616914	0.40432	0.606188	0.999736	2.34083	1.221	0.790024	0.820577	1.02334	1.1168	1.02319
1.81307	0.765135	1.52333	1.51787	1.37849	0.996039	0.611427	0.907512	4.42114	1.69276	0.617074	0.279703	0.46689	0.662353	0.618565	0.405464	0.613411	1.00255	2.37613	1.22409	0.788608	0.822635	1.02568	1.12109	1.02293
1.81973	0.767122	1.53078	1.50749	1.38479	1.00059	0.608527	0.905733	4.50778	1.70225	0.619477	0.280157	0.466764	0.66377	0.620665	0.406616	0.619381	1.00509	2.4141	1.2277	0.787623	0.824469	1.02795	1.12515	1.02294
1.8264	0.76817	1.53837	1.49261	1.3918	1.00578	0.605529	0.903852	4.59809	1.71228	0.62178	0.280635	0.46656	0.66518	0.623158	0.407763	0.623866	1.00723	2.45571	1.23192	0.787133	0.826006	1.03011	1.12865	1.02308
1.83307	0.768218	1.54615	1.47412	1.3994	1.01164	0.602535	0.901931	4.69243	1.72276	0.623915	0.281128	0.466266	0.666605	0.625994	0.4089	0.626731	1.00887	2.50201	1.23677	0.787197	0.827195	1.03218	1.13128	1.02323
1.83973	0.767256	1.55413	1.45342	1.40747	1.01818	0.59962	0.900028	4.7912	1.73357	0.625831	0.28162	0.46586	0.668054	0.629136	0.410033	0.627944	1.00994	2.55406	1.2422	0.787857	0.828012	1.03425	1.13279	1.02332
1.8464	0.765336	1.56234	1.43212	1.41582	1.02536	0.596838	0.898197	4.89485	1.74458	0.627497	0.282098	0.465318	0.669523	0.632575	0.411175	0.627573	1.01039	2.61282	1.24809	0.789139	0.828469	1.03638	1.13304	1.02335
1.85307	0.762571	1.57076	1.41178	1.42425	1.03307	0.594228	0.896482	5.00384	1.75568	0.628909	0.282552	0.464619	0.670997	0.63634	0.412337	0.625778	1.01019	2.67902	1.25423	0.791043	0.828613	1.03862	1.13199	1.02337
1.85973	0.759136	1.57936	1.39377	1.43257	1.04116	0.59182	0.894914	5.11866	1.76679	0.630082	0.282977	0.463745	0.672452	0.64051	0.413532	0.622789	1.0094	2.75299	1.26037	0.793539	0.828519	1.04099	1.12977	1.02347
1.8664	0.755252	1.58806	1.37908	1.4406	1.04949	0.589642	0.893511	5.23979	1.77787	0.631053	0.283371	0.46269	0.673856	0.645201	0.41477	0.618879	1.00811	2.8345	1.26623	0.796568	0.828273	1.04343	1.1267	1.02371
1.87307	0.751179	1.59677	1.36833	1.44824	1.05791	0.587722	0.892272	5.3677	1.78893	0.631867	0.283741	0.461458	0.675181	0.650562	0.416054	0.614335	1.00648	2.92272	1.27151	0.800052	0.827966	1.04582	1.12325	1.02416
1.87973	0.747187	1.60538	1.36174	1.45545	1.0664	0.586089	0.891188	5.50278	1.80001	0.632576	0.284094	0.460063	0.676401	0.656746	0.417389	0.60942	1.00472	3.01606	1.27593	0.803899	0.827682	1.04799	1.11997	1.02486
1.8864	0.743525	1.61376	1.35911	1.46232	1.07507	0.584768	0.890235	5.64538	1.81122	0.633226	0.284443	0.458529	0.677498	0.663884	0.418773	0.604341	1.00304	3.11227	1.27925	0.808016	0.8275	1.0498	1.11729	1.02578
1.89307	0.740399	1.62181	1.35985	1.46903	1.08416	0.583774	0.889387	5.79574	1.82269	0.633856	0.284799	0.456885	0.678464	0.672054	0.420205	0.599239	1.00164	3.2085	1.28133	0.812322	0.827483	1.05111	1.11545	1.02687
1.89973	0.737959	1.62942	1.36303	1.47582	1.09408	0.583106	0.888611	5.95402	1.83457	0.634488	0.285173	0.455162	0.679304	0.681265	0.421682	0.594172	1.00066	3.30151	1.28213	0.81675	0.827681	1.05183	1.11444	1.02802
1.9064	0.736289	1.63654	1.36744	1.48296	1.10531	0.582747	0.887881	6.12032	1.84704	0.635131	0.285569	0.453394	0.680028	0.691435	0.423194	0.589151	1.00023	3.38783	1.28172	0.821247	0.82813	1.05196	1.11407	1.0291
1.91307	0.735413	1.64313	1.37171	1.49072	1.11834	0.582657	0.887171	6.29466	1.86025	0.635778	0.285988	0.451614	0.68065	0.702399	0.424734	0.584163	1.00037	3.46409	1.2803	0.825781	0.828845	1.05155	1.11406	1.02997
1.91973	0.735308	1.64918	1.3745	1.49928	1.13362	0.582782	0.88646	6.47698	1.87437	0.636412	0.286425	0.449858	0.681185	0.713919	0.426287	0.579222	1.00111	3.52725	1.27814	0.830335	0.82983	1.05069	1.11415	1.0305
1.9264	0.735915	1.65471	1.37472	1.50875	1.1515	0.583054	0.885734	6.66706	1.88949	0.637009	0.286869	0.448158	0.681647	0.725704	0.427835	0.574388	1.00238	3.57482	1.27562	0.834901	0.831068	1.04952	1.11416	1.03063
1.93307	0.737159	1.65974	1.37174	1.51921	1.17227	0.583401	0.88498	6.86448	1.90569	0.637543	0.287305	0.446548	0.682053	0.737441	0.429352	0.569792	1.00412	3.6051	1.27315	0.839479	0.832532	1.04817	1.114	1.03034
1.93973	0.738957	1.66431	1.36549	1.53076	1.19631	0.583755	0.884191	7.06855	1.92298	0.637988	0.287716	0.445065	0.682419	0.748823	0.430809	0.565608	1.00623	3.61725	1.27116	0.844071	0.83418	1.04679	1.11373	1.02971
1.9464	0.741231	1.66847	1.35653	1.5436	1.22427	0.584057	0.88336	7.27823	1.9413	0.638326	0.288083	0.443745	0.682766	0.759576	0.432164	0.562021	1.00859	3.61137	1.27005	0.848675	0.835964	1.04548	1.11349	1.02886
1.95307	0.743911	1.67226	1.34584	1.55817	1.2573	0.584267	0.882485	7.49218	1.96053	0.638541	0.288393	0.442626	0.683117	0.769478	0.433373	0.559191	1.0111	3.58842	1.27021	0.853289	0.837831	1.04437	1.11352	1.02793
1.95973	0.746938	1.67573	1.33473	1.5752	1.29732	0.584367	0.881572	7.70867	1.98048	0.638628	0.288633	0.441745	0.683503	0.778371	0.434384	0.557211	1.01365	3.5501	1.27194	0.8579	0.839727	1.04355	1.11405	1.02708
1.9664	0.750259	1.67891	1.32451	1.59566	1.34705	0.584365	0.880631	7.92578	2.00092	0.638585	0.288795	0.441141	0.683962	0.786163	0.435148	0.556106	1.01614	3.49866	1.27549	0.862496	0.841602	1.04307	1.11526	1.02642
1.97307	0.753828	1.68183	1.3164	1.62064	1.41001	0.584289	0.879685	8.14145	2.02157	0.638415	0.288879	0.440844	0.684531	0.792825	0.435621	0.555845	1.01851	3.43667	1.28102	0.867063	0.843413	1.04298	1.11719	1.02607
1.97973	0.757605	1.68452	1.31132	1.65111	1.49012	0.584189	0.878764	8.35368	2.04216	0.638118	0.288891	0.440879	0.685247	0.79838	0.435771	0.556385	1.02071	3.36686	1.2886	0.87159	0.845128	1.0433	1.11972	1.02608
1.9864	0.761547	1.68699	1.30991	1.68755	1.59116	0.584123	0.877903	8.5606	2.06245	0.637697	0.288845	0.441257	0.686139	0.802894	0.435587	0.557714	1.02268	3.29187	1.29826	0.876073	0.846724	1.044	1.12261	1.0265
1.99307	0.765609	1.68927	1.31244	1.72972	1.71597	0.584153	0.877149	8.7607	2.08228	0.637142	0.288759	0.441976	0.68722	0.806458	0.435074	0.559905	1.02443	3.21415	1.30994	0.88051	0.848185	1.04504	1.12556	1.02736
1.99973	0.769744	1.69138	1.31884	1.77652	1.86576	0.584332	0.87655	8.95276	2.10154	0.636445	0.288653	0.443016	0.688496	0.809182	0.43426	0.563153	1.02593	3.13582	1.32355	0.884907	0.849501	1.04637	1.12825	1.02867
2.0064	0.773895	1.69337	1.32871	1.82609	2.03954	0.5847	0.876153	9.13587	2.12026	0.635592	0.288554	0.444339	0.689957	0.811177	0.433194	0.567789	1.02719	3.05857	1.33894	0.889266	0.85066	1.0479	1.13048	1.03042
2.01307	0.778003	1.69529	1.34135	1.87621	2.23395	0.58528	0.876002	9.30944	2.13854	0.634572	0.288482	0.445891	0.691586	0.81255	0.431942	0.574257	1.02822	2.98366	1.35591	0.893587	0.851657	1.04956	1.13216	1.03259
2.01973	0.782003	1.69719	1.3558	1.92461	2.44354	0.586073	0.876136	9.47308	2.15655	0.633381	0.28846	0.447599	0.693357	0.813402	0.43058	0.583055	1.02903	2.91189	1.37421	0.897864	0.852482	1.05126	1.13327	1.0351
2.0264	0.785832	1.69913	1.37091	1.96936	2.66123	0.587064	0.876576	9.6265	2.17452	0.63202	0.288504	0.44938	0.695241	0.813813	0.429192	0.594642	1.02963	2.84361	1.39352	0.90208	0.853129	1.05291	1.13392	1.03788
2.03307	0.789437	1.70119	1.38543	2.009	2.87899	0.588225	0.877336	9.76937	2.19266	0.630507	0.288625	0.451145	0.697213	0.813849	0.427855	0.609325	1.03005	2.77887	1.41348	0.906204	0.853604	1.05442	1.1342	1.04081
2.03973	0.792777	1.70342	1.39816	2.0426	3.08848	0.589517	0.878411	9.9012	2.21117	0.628869	0.28883	0.452801	0.699252	0.813559	0.426642	0.627162	1.03031	2.71743	1.43361	0.910199	0.853918	1.05573	1.13423	1.0438
2.0464	0.795832	1.70587	1.40806	2.0697	3.28169	0.590891	0.879779	10.0212	2.2302	0.627151	0.28912	0.454264	0.701345	0.812973	0.425602	0.647901	1.03042	2.65895	1.4534	0.914023	0.854093	1.05674	1.13409	1.04675
2.05307	0.798613	1.70859	1.41438	2.0902	3.45137	0.592296	0.881408	10.1283	2.24982	0.625406	0.289492	0.455461	0.703486	0.81211	0.424772	0.670982	1.03041	2.60308	1.47231	0.917634	0.854163	1.05742	1.13383	1.04958
2.05973	0.801154	1.71161	1.41678	2.10424	3.59136	0.593677	0.883256	10.2215	2.27004	0.623698	0.289944	0.456339	0.705676	0.810981	0.424165	0.695583	1.03029	2.54961	1.48975	0.921001	0.854166	1.05774	1.13348	1.05221
2.0664	0.803522	1.71492	1.41529	2.11211	3.69685	0.594981	0.885277	10.2997	2.29079	0.6221	0.290473	0.456866	0.707917	0.80959	0.423781	0.72071	1.03006	2.49846	1.5052	0.924106	0.854147	1.0577	1.13305	1.05462
2.07307	0.805802	1.71852	1.41027	2.11415	3.76451	0.596157	0.88743	10.3629	2.31195	0.620682	0.291078	0.45704	0.71021	0.807947	0.423604	0.745297	1.02976	2.44977	1.51816	0.926953	0.854146	1.05734	1.13256	1.05676
2.07973	0.808095	1.72236	1.4023	2.11075	3.7925	0.59716	0.889678	10.4116	2.33337	0.619517	0.291759	0.456881	0.712551	0.806071	0.423612	0.768312	1.0294	2.40385	1.52819	0.92956	0.854204	1.05676	1.13206	1.05865
2.0864	0.81051	1.7264	1.39206	2.10223	3.78049	0.597953	0.891997	10.4476	2.35486	0.618665	0.292519	0.456432	0.714934	0.803991	0.423775	0.788837	1.02902	2.36111	1.53495	0.931964	0.854357	1.05605	1.13162	1.06029
2.09307	0.813149	1.73059	1.38019	2.08893	3.72959	0.598514	0.894371	10.4728	2.37627	0.618172	0.293361	0.455752	0.717344	0.801756	0.424065	0.80612	1.02864	2.32198	1.53815	0.934214	0.854633	1.05535	1.13134	1.06168
2.09973	0.816103	1.73485	1.36723	2.07113	3.64225	0.598828	0.896796	10.4895	2.39747	0.618065	0.294284	0.454912	0.719764	0.799434	0.424452	0.819608	1.02829	2.28682	1.53763	0.936368	0.855063	1.05476	1.1313	1.06283
2.1064	0.819445	1.73914	1.35355	2.04909	3.52211	0.598896	0.899273	10.4997	2.41837	0.61835	0.295288	0.453986	0.722172	0.797111	0.424909	0.828957	1.02802	2.25588	1.5333	0.938488	0.855667	1.05437	1.13157	1.06376
2.11307	0.823224	1.74343	1.33935	2.02306	3.37385	0.59873	0.901808	10.5049	2.43895	0.61901	0.296364	0.453045	0.724543	0.794889	0.425411	0.83402	1.02784	2.22921	1.52521	0.940633	0.85646	1.05424	1.13214	1.06446
2.11973	0.827465	1.7477	1.32467	1.99332	3.20298	0.598351	0.904408	10.5062	2.45922	0.620008	0.2975	0.452148	0.726853	0.792889	0.425939	0.834841	1.02779	2.20671	1.5135	0.94286	0.857443	1.05436	1.13295	1.06492
2.1264	0.832172	1.75194	1.30941	1.96019	3.01563	0.597793	0.907076	10.5046	2.47928	0.621291	0.29868	0.45134	0.729079	0.791241	0.426471	0.831641	1.02788	2.18807	1.49849	0.945217	0.858604	1.05466	1.13388	1.06515
2.13307	0.837327	1.75618	1.29344	1.92409	2.81829	0.597094	0.909813	10.5008	2.49922	0.622797	0.29988	0.450649	0.7312	0.790082	0.426993	0.824798	1.02812	2.17286	1.4806	0.947751	0.859915	1.05508	1.13483	1.06516
2.13973	0.842905	1.76045	1.27663	1.8856	2.61754	0.596303	0.912607	10.4956	2.51918	0.624462	0.301072	0.450081	0.733198	0.789542	0.427493	0.814833	1.02853	2.16057	1.46036	0.9505	0.861333	1.05551	1.13569	1.06495
2.1464	0.848869	1.76478	1.25892	1.84542	2.41974	0.595471	0.915444	10.4899	2.53934	0.626223	0.302225	0.44963	0.735058	0.789745	0.427964	0.802381	1.0291	2.15063	1.43846	0.953496	0.862807	1.05586	1.1364	1.06454
2.15307	0.855187	1.76923	1.24041	1.80449	2.23067	0.594654	0.918298	10.4846	2.55983	0.628029	0.303306	0.449274	0.736772	0.790791	0.428402	0.788174	1.02984	2.14252	1.41562	0.956768	0.86428	1.0561	1.13696	1.06395
2.15973	0.861829	1.77382	1.22137	1.76386	2.05525	0.593909	0.921134	10.4805	2.58079	0.629842	0.304282	0.448988	0.738336	0.792753	0.428813	0.773002	1.03073	2.13574	1.39265	0.960342	0.865706	1.05619	1.13744	1.06323
2.1664	0.868779	1.77861	1.20221	1.72472	1.89722	0.593291	0.923913	10.4784	2.60234	0.631645	0.305126	0.448744	0.739751	0.795667	0.429208	0.757682	1.03178	2.1299	1.37037	0.964237	0.867053	1.05616	1.13793	1.0624
2.17307	0.876031	1.7836	1.18346	1.68819	1.75893	0.592852	0.926586	10.4788	2.62457	0.633439	0.30582	0.448519	0.741025	0.79953	0.429603	0.743017	1.03298	2.12474	1.34955	0.968471	0.868311	1.05602	1.13848	1.0615
2.17973	0.883594	1.78883	1.16571	1.65524	1.64125	0.592636	0.929107	10.4816	2.64753	0.635248	0.306358	0.448299	0.742169	0.804299	0.430019	0.729752	1.03432	2.12008	1.33088	0.97305	0.869485	1.0558	1.13917	1.06058
2.1864	0.891492	1.79429	1.14955	1.62651	1.54363	0.592676	0.93143	10.4869	2.67124	0.637114	0.306747	0.448078	0.743198	0.809896	0.430477	0.718528	1.0358	2.11589	1.31495	0.977971	0.870599	1.05553	1.14001	1.05966
2.19307	0.899762	1.79996	1.13547	1.60222	1.46434	0.592994	0.933516	10.4939	2.69567	0.639093	0.307009	0.447863	0.744131	0.816221	0.431	0.709841	1.03741	2.11217	1.30217	0.983218	0.871682	1.05522	1.141	1.05877
2.19973	0.908449	1.80583	1.12389	1.58218	1.40086	0.593598	0.935341	10.5019	2.72079	0.641251	0.307174	0.447665	0.744986	0.823151	0.431603	0.704005	1.03915	2.10903	1.2928	0.988761	0.872763	1.05489	1.14208	1.05794
2.2064	0.91761	1.81185	1.11507	1.56589	1.35032	0.594479	0.936893	10.5097	2.74648	0.643653	0.307279	0.447504	0.745786	0.830567	0.432297	0.701129	1.04101	2.10654	1.28692	0.994553	0.873872	1.05457	1.14322	1.05719
2.21307	0.927307	1.818	1.10912	1.55266	1.30985	0.595617	0.938184	10.5161	2.77264	0.646354	0.307363	0.447404	0.746552	0.838352	0.433088	0.701114	1.04299	2.10482	1.28445	1.00053	0.875033	1.05427	1.14439	1.05653
2.21973	0.93761	1.82421	1.10604	1.54176	1.2769	0.596978	0.93924	10.5195	2.79913	0.649392	0.307459	0.447384	0.747307	0.846405	0.433971	0.70368	1.04506	2.10393	1.2852	1.00663	0.87626	1.05405	1.14555	1.05597
2.2264	0.94859	1.83045	1.10566	1.53254	1.24943	0.598518	0.94011	10.5183	2.82578	0.652782	0.307596	0.447462	0.748079	0.854645	0.434936	0.708411	1.04721	2.10391	1.28883	1.01277	0.877563	1.05395	1.1467	1.05554
2.23307	0.960319	1.83667	1.10768	1.52451	1.22593	0.600184	0.940854	10.5109	2.85244	0.656507	0.307794	0.447652	0.748897	0.863012	0.435967	0.714824	1.0494	2.10476	1.29493	1.01888	0.878944	1.05402	1.14787	1.05522
2.23973	0.972868	1.84285	1.11169	1.51729	1.20534	0.601922	0.94154	10.4956	2.87896	0.660519	0.308065	0.447958	0.749795	0.871466	0.43704	0.722426	1.05161	2.10645	1.30305	1.02489	0.880397	1.05429	1.14906	1.05502
2.2464	0.986304	1.84895	1.11717	1.51065	1.18702	0.603674	0.94224	10.4711	2.9052	0.664734	0.308414	0.448379	0.750812	0.879988	0.438126	0.730773	1.05379	2.10889	1.31267	1.03075	0.881914	1.05478	1.15031	1.05494
2.25307	1.00068	1.85497	1.12352	1.50448	1.17058	0.605388	0.943013	10.4364	2.93103	0.669043	0.308842	0.448906	0.751989	0.888575	0.439191	0.739495	1.05591	2.112	1.3233	1.03644	0.88348	1.0555	1.15162	1.05495
2.25973	1.01604	1.86091	1.13011	1.4987	1.15578	0.607018	0.943909	10.3908	2.95638	0.673313	0.309343	0.449523	0.753366	0.897233	0.440196	0.748309	1.05793	2.11566	1.33444	1.04196	0.885077	1.0564	1.15299	1.05505
2.2664	1.0324	1.86677	1.13631	1.49326	1.14243	0.608528	0.944958	10.3341	2.98115	0.677401	0.309908	0.450214	0.754985	0.905982	0.441099	0.757011	1.05982	2.11972	1.34566	1.04734	0.886687	1.05744	1.15443	1.05521
2.27307	1.04975	1.87256	1.14154	1.4881	1.13036	0.609892	0.94617	10.2663	3.00531	0.681165	0.310526	0.450958	0.756879	0.914846	0.441859	0.765472	1.06155	2.12402	1.35655	1.05265	0.88829	1.05859	1.15598	1.05544
2.27973	1.06805	1.8783	1.14535	1.48318	1.11941	0.6111	0.947533	10.1878	3.02885	0.684476	0.311182	0.451733	0.759072	0.923853	0.442433	0.773617	1.0631	2.12836	1.3668	1.05797	0.889863	1.05977	1.15768	1.05573
2.2864	1.08721	1.884	1.14737	1.47844	1.10936	0.612154	0.94902	10.0994	3.05177	0.687233	0.311862	0.452522	0.761582	0.933032	0.442783	0.781417	1.06446	2.13257	1.37613	1.06343	0.891385	1.06096	1.1596	1.05609
2.29307	1.10711	1.88968	1.14744	1.47382	1.10002	0.613066	0.950589	10.0016	3.07414	0.689369	0.312551	0.453306	0.764407	0.942406	0.442881	0.788877	1.06563	2.13644	1.38434	1.06917	0.892834	1.0621	1.16183	1.05652
2.29973	1.12755	1.89535	1.14549	1.46931	1.09122	0.613863	0.952188	9.89515	3.09602	0.690856	0.313234	0.454074	0.767534	0.951981	0.442705	0.796024	1.06661	2.13981	1.39127	1.07535	0.89419	1.06319	1.16442	1.05704
2.3064	1.14832	1.90101	1.14161	1.46495	1.08281	0.614574	0.953763	9.78068	3.11754	0.691712	0.313896	0.454818	0.770937	0.961747	0.44225	0.802906	1.06741	2.14252	1.39682	1.08214	0.895434	1.06421	1.16739	1.05766
2.31307	1.16912	1.90667	1.13594	1.46083	1.07471	0.615234	0.955259	9.65869	3.13883	0.691989	0.314527	0.455534	0.774578	0.971658	0.441525	0.809576	1.06805	2.14447	1.40089	1.08974	0.896551	1.06518	1.1707	1.05837
2.31974	1.18964	1.9123	1.12866	1.45711	1.06688	0.61588	0.956624	9.52957	3.16003	0.691774	0.315118	0.456223	0.778407	0.981634	0.440553	0.816094	1.06855	2.1456	1.40341	1.09832	0.897531	1.06612	1.1743	1.05917
2.3264	1.20954	1.91791	1.11994	1.45405	1.05933	0.616543	0.957818	9.39347	3.1813	0.691178	0.315664	0.45689	0.782372	0.991558	0.439375	0.822516	1.06893	2.14591	1.40432	1.10809	0.898368	1.06706	1.17806	1.06003
2.33307	1.22845	1.92348	1.10992	1.45192	1.05211	0.61725	0.958813	9.25035	3.20276	0.690318	0.316166	0.457544	0.786415	1.00128	0.438041	0.828884	1.06921	2.14546	1.40354	1.11923	0.899064	1.06805	1.18183	1.06093
2.33974	1.24604	1.92897	1.09868	1.45103	1.04527	0.618021	0.959591	9.09988	3.22453	0.689316	0.316629	0.458192	0.79048	1.01063	0.436615	0.835228	1.06941	2.14433	1.401	1.13193	0.899622	1.06911	1.18544	1.06181
2.3464	1.26201	1.93435	1.08625	1.45161	1.03887	0.618865	0.960152	8.94155	3.24669	0.688281	0.317063	0.458846	0.794512	1.01941	0.435163	0.841554	1.06955	2.14266	1.39665	1.14632	0.900054	1.07029	1.18872	1.06264
2.35307	1.27609	1.93961	1.07266	1.4538	1.03295	0.619785	0.960513	8.77469	3.26926	0.687306	0.31748	0.459516	0.798462	1.02746	0.433755	0.847849	1.06963	2.14058	1.39044	1.16253	0.900372	1.0716	1.19152	1.06339
2.35974	1.28811	1.94469	1.05792	1.4576	1.02753	0.620772	0.960703	8.59869	3.29225	0.686455	0.317895	0.460208	0.802286	1.03462	0.432461	0.854076	1.06967	2.13825	1.38235	1.18061	0.90059	1.07304	1.19371	1.06405
2.3664	1.29797	1.94956	1.04206	1.46286	1.0226	0.621811	0.960762	8.41319	3.31559	0.685766	0.318322	0.460928	0.805946	1.04076	0.431347	0.860179	1.06965	2.13582	1.37241	1.20054	0.90072	1.07462	1.19524	1.06462
2.37307	1.30562	1.95419	1.02518	1.4693	1.01814	0.622875	0.960744	8.21824	3.3392	0.685247	0.318777	0.461677	0.809415	1.04578	0.430471	0.866092	1.06958	2.13342	1.36075	1.22224	0.900776	1.07629	1.19609	1.06514
2.37974	1.31114	1.95855	1.00742	1.47656	1.0141	0.623936	0.960707	8.01451	3.36297	0.684883	0.319268	0.462457	0.81267	1.04964	0.429887	0.871747	1.06946	2.13115	1.34752	1.24553	0.900768	1.07802	1.19634	1.06562
2.3864	1.31462	1.96262	0.989015	1.48424	1.01042	0.624963	0.960711	7.80337	3.38678	0.684637	0.319806	0.463269	0.815704	1.05231	0.429637	0.877082	1.06929	2.12909	1.33299	1.27015	0.900707	1.07977	1.19611	1.06612
2.39307	1.31622	1.96636	0.970256	1.49196	1.00704	0.625924	0.960812	7.58694	3.41049	0.684462	0.320393	0.464113	0.818513	1.05382	0.429756	0.882045	1.06907	2.12728	1.31751	1.29575	0.900597	1.0815	1.19552	1.06666
2.39974	1.31613	1.96978	0.951479	1.49935	1.00391	0.626792	0.961063	7.36799	3.43399	0.684306	0.32103	0.464992	0.821108	1.05421	0.43027	0.886605	1.06883	2.12572	1.30147	1.32191	0.900443	1.08317	1.1947	1.06727
2.4064	1.31456	1.97286	0.93304	1.50612	1.00099	0.627546	0.961502	7.14987	3.45717	0.68412	0.321714	0.465909	0.82351	1.05355	0.431192	0.890745	1.06856	2.12437	1.28533	1.34816	0.900251	1.08475	1.19372	1.06795
2.41307	1.31172	1.9756	0.915296	1.51201	0.998236	0.628175	0.962156	6.93627	3.47996	0.683866	0.322439	0.466868	0.825745	1.05195	0.43253	0.894472	1.0683	2.12317	1.26958	1.37396	0.900025	1.08625	1.1926	1.06874
2.41974	1.3078	1.97801	0.898571	1.51684	0.995625	0.628676	0.963037	6.73101	3.50233	0.683518	0.323197	0.467875	0.827847	1.04952	0.434279	0.897808	1.06804	2.12202	1.25472	1.39878	0.89977	1.08765	1.19133	1.0697
2.4264	1.30298	1.9801	0.883138	1.52049	0.993145	0.629054	0.964142	6.53778	3.52426	0.683066	0.323976	0.468936	0.829856	1.0464	0.436428	0.900787	1.0678	2.12081	1.24121	1.42209	0.899496	1.08898	1.18989	1.0709
2.43307	1.29742	1.98188	0.869202	1.52287	0.990788	0.629322	0.965453	6.35995	3.54583	0.682518	0.324767	0.470056	0.83181	1.04275	0.438955	0.903453	1.0676	2.11941	1.2295	1.4434	0.899212	1.09027	1.18823	1.07245
2.43974	1.29125	1.98338	0.856897	1.52398	0.988556	0.629496	0.966942	6.2004	3.56712	0.681895	0.325557	0.471242	0.833748	1.03873	0.441831	0.905853	1.06743	2.11772	1.21998	1.46224	0.898935	1.09155	1.18639	1.07446
2.4464	1.28455	1.98461	0.84628	1.52384	0.986452	0.629596	0.96857	6.0614	3.58828	0.681232	0.326333	0.472497	0.835705	1.03452	0.44502	0.908033	1.0673	2.11564	1.21296	1.47827	0.898681	1.09283	1.18441	1.07705
2.45307	1.27741	1.98558	0.837337	1.52256	0.984483	0.629645	0.970296	5.9446	3.60952	0.680573	0.327083	0.473826	0.83771	1.03029	0.448479	0.910038	1.06721	2.11309	1.20866	1.49123	0.898472	1.09412	1.18243	1.08031
2.45974	1.26988	1.98631	0.829987	1.52027	0.982658	0.629662	0.972071	5.85096	3.63105	0.679964	0.327798	0.475232	0.839783	1.02619	0.452156	0.911904	1.06715	2.11003	1.20725	1.50098	0.898334	1.09541	1.18063	1.08432
2.4664	1.26199	1.9868	0.824085	1.51719	0.980987	0.629665	0.973849	5.78081	3.65316	0.679457	0.328466	0.476713	0.841938	1.02236	0.455998	0.913664	1.06714	2.10644	1.20878	1.50749	0.898291	1.09666	1.17921	1.08911
2.47307	1.25379	1.98706	0.819441	1.51357	0.979484	0.62967	0.975584	5.73387	3.67614	0.679102	0.329081	0.478266	0.844184	1.01892	0.459944	0.915339	1.06715	2.10235	1.21323	1.51087	0.898371	1.09784	1.17836	1.09468
2.47974	1.24528	1.98709	0.815833	1.50974	0.978165	0.629685	0.977234	5.70922	3.70029	0.678944	0.329639	0.479883	0.846517	1.01593	0.463931	0.916952	1.06721	2.09783	1.22047	1.51135	0.898598	1.0989	1.17824	1.10098
2.4864	1.23653	1.9869	0.813013	1.50601	0.977051	0.629716	0.978762	5.70544	3.72589	0.679025	0.330135	0.481549	0.848936	1.01343	0.467895	0.918517	1.06731	2.09296	1.23031	1.50923	0.898996	1.0998	1.17893	1.10793
2.49307	1.22757	1.98648	0.810722	1.50275	0.976162	0.629764	0.980138	5.72059	3.75321	0.67938	0.330572	0.483247	0.851429	1.01141	0.47177	0.920053	1.06745	2.08786	1.24245	1.50492	0.899587	1.10051	1.18044	1.11537
2.49974	1.21847	1.98582	0.808711	1.50026	0.975524	0.629826	0.981339	5.75231	3.78247	0.680039	0.330949	0.484952	0.85399	1.00982	0.475497	0.921573	1.06765	2.08265	1.25654	1.49888	0.900383	1.10103	1.18268	1.12314
2.5064	1.20931	1.98493	0.806748	1.49877	0.975161	0.629902	0.982349	5.79788	3.81383	0.681026	0.331272	0.48664	0.856608	1.0086	0.479018	0.923097	1.06792	2.07745	1.27218	1.49162	0.901392	1.10137	1.18554	1.13103
2.51307	1.20018	1.98379	0.804636	1.49839	0.975092	0.629988	0.983165	5.85435	3.84741	0.68236	0.331545	0.488283	0.859276	1.00766	0.482288	0.924645	1.06827	2.07237	1.28889	1.48362	0.902616	1.10155	1.18883	1.13881
2.51974	1.1912	1.98241	0.802215	1.49908	0.975331	0.630085	0.983787	5.91859	3.88323	0.684053	0.331773	0.489854	0.861987	1.00689	0.485267	0.926237	1.0687	2.06752	1.30618	1.47538	0.904044	1.10162	1.19239	1.14627
2.5264	1.18249	1.98079	0.799373	1.50065	0.975881	0.630197	0.984229	5.98742	3.92127	0.686115	0.331962	0.491332	0.864739	1.00621	0.487932	0.927895	1.06922	2.06296	1.32354	1.46736	0.905658	1.10163	1.19607	1.15316
2.53307	1.17419	1.97895	0.796034	1.50277	0.976735	0.630329	0.984511	6.05773	3.96144	0.688553	0.332119	0.492698	0.86753	1.00555	0.490272	0.929642	1.06985	2.05876	1.34047	1.45996	0.907433	1.10162	1.19977	1.15928
2.53974	1.16644	1.97691	0.792176	1.50503	0.977873	0.630487	0.984656	6.1266	4.00357	0.691368	0.332248	0.493943	0.870361	1.00486	0.492288	0.9315	1.07058	2.05495	1.35647	1.4535	0.909331	1.10162	1.20343	1.16444
2.5464	1.15938	1.97471	0.787809	1.50702	0.97926	0.630681	0.984695	6.19138	4.04746	0.69456	0.332355	0.495066	0.873235	1.00413	0.493994	0.933496	1.07141	2.05156	1.3711	1.44826	0.911311	1.10166	1.20701	1.16848
2.55307	1.15313	1.9724	0.782966	1.50837	0.980849	0.630917	0.984659	6.24979	4.09291	0.698122	0.332446	0.496073	0.87615	1.00334	0.495413	0.935656	1.07234	2.0486	1.38395	1.44442	0.913324	1.10174	1.2105	1.17129
2.55974	1.14783	1.97005	0.777703	1.50884	0.982586	0.631203	0.984579	6.29995	4.13967	0.702045	0.33253	0.496983	0.879111	1.00253	0.496575	0.938007	1.07335	2.0461	1.39471	1.44211	0.915321	1.10184	1.21386	1.17279
2.5664	1.14355	1.96772	0.772084	1.50828	0.98441	0.631546	0.984481	6.34042	4.1875	0.706311	0.332612	0.497819	0.882112	1.00173	0.49751	0.940581	1.07445	2.04406	1.40311	1.44136	0.917251	1.10195	1.21702	1.17296
2.57307	1.14037	1.96551	0.766188	1.50672	0.986258	0.631951	0.984392	6.3702	4.23619	0.710898	0.332704	0.498615	0.885149	1.001	0.498253	0.943408	1.0756	2.04252	1.40901	1.44219	0.919067	1.10205	1.21991	1.1718
2.57974	1.13832	1.96349	0.760084	1.50424	0.988072	0.632424	0.98433	6.38877	4.28555	0.71578	0.332815	0.49941	0.888213	1.00037	0.498838	0.94652	1.0768	2.04153	1.41234	1.44454	0.920733	1.10214	1.22242	1.16938
2.5864	1.13742	1.96174	0.753844	1.50103	0.989796	0.632968	0.984311	6.396	4.33542	0.720921	0.332957	0.500251	0.89129	0.99988	0.499296	0.949948	1.07803	2.04115	1.41311	1.44834	0.922212	1.1022	1.2245	1.16579
2.59307	1.13763	1.96035	0.74754	1.49731	0.991386	0.633589	0.984345	6.39224	4.38566	0.726284	0.333145	0.501192	0.894363	0.999563	0.499659	0.95372	1.07927	2.04148	1.41143	1.4535	0.923484	1.10224	1.22611	1.16119
2.59974	1.13891	1.95938	0.741232	1.49332	0.992808	0.634289	0.98444	6.37816	4.4362	0.731824	0.33339	0.502292	0.897413	0.999417	0.499953	0.957862	1.08051	2.04259	1.40751	1.4599	0.924538	1.10225	1.22728	1.15574
2.6064	1.14117	1.95889	0.734985	1.48926	0.994037	0.635073	0.984603	6.35483	4.48696	0.737496	0.333706	0.503623	0.900416	0.999435	0.500204	0.962391	1.08174	2.04461	1.40159	1.46743	0.925369	1.10227	1.22808	1.14962
2.61307	1.14434	1.95893	0.728856	1.48536	0.995063	0.635941	0.984839	6.32356	4.53789	0.743252	0.334105	0.505267	0.903348	0.999584	0.500429	0.967319	1.08294	2.04764	1.39401	1.47601	0.925987	1.1023	1.2286	1.14304
2.61974	1.14829	1.95953	0.722905	1.48175	0.995883	0.636895	0.985152	6.28588	4.58895	0.749044	0.334601	0.507327	0.906186	0.999822	0.500645	0.972647	1.0841	2.05179	1.38512	1.48552	0.926406	1.10235	1.22894	1.1362
2.6264	1.15294	1.96072	0.717182	1.47858	0.996502	0.637933	0.985551	6.24344	4.64013	0.754821	0.335201	0.509924	0.908909	1.0001	0.500863	0.978366	1.08523	2.05715	1.3753	1.49588	0.926647	1.10244	1.22918	1.1293
2.63307	1.15818	1.96248	0.71174	1.47596	0.996937	0.639053	0.986043	6.19791	4.69143	0.760538	0.335913	0.513209	0.911498	1.00035	0.501091	0.984457	1.0863	2.06379	1.36494	1.50701	0.92673	1.10257	1.22941	1.12251
2.63974	1.16389	1.96481	0.706624	1.47394	0.997208	0.640249	0.98664	6.15088	4.74286	0.766148	0.336744	0.517367	0.913938	1.00054	0.501334	0.990888	1.08732	2.07176	1.35442	1.51883	0.92668	1.10273	1.22968	1.116
2.6464	1.16998	1.96766	0.701872	1.47258	0.997339	0.641511	0.987352	6.10383	4.79445	0.77161	0.337697	0.52262	0.916221	1.00061	0.501594	0.997622	1.08827	2.08107	1.34408	1.53128	0.926515	1.1029	1.23002	1.10989
2.65307	1.17636	1.97097	0.697515	1.4719	0.997356	0.642829	0.988196	6.05799	4.84628	0.776883	0.338771	0.529228	0.918342	1.00056	0.501871	1.00461	1.08914	2.0917	1.33423	1.54428	0.926252	1.10306	1.23047	1.10429
2.65974	1.18293	1.97469	0.693574	1.47192	0.997289	0.644191	0.989185	6.01437	4.89842	0.781931	0.339966	0.537487	0.920306	1.00037	0.502165	1.0118	1.08993	2.10359	1.32509	1.55774	0.925903	1.10319	1.23102	1.09926
2.6664	1.1896	1.97871	0.690062	1.47264	0.997168	0.645581	0.990337	5.97372	4.95098	0.786721	0.341275	0.547726	0.922122	1.00005	0.502475	1.01914	1.09063	2.11664	1.31688	1.57158	0.925475	1.10329	1.23166	1.09483
2.67307	1.19631	1.98295	0.686974	1.47405	0.997019	0.646984	0.991664	5.9365	5.00412	0.791225	0.342692	0.560286	0.923807	0.999633	0.502802	1.02658	1.09121	2.13072	1.30973	1.58569	0.924973	1.10337	1.23235	1.09102
2.67974	1.20298	1.98731	0.684292	1.47614	0.99687	0.648381	0.993182	5.90298	5.058	0.795419	0.344208	0.575499	0.925384	0.999171	0.503144	1.03408	1.09169	2.14568	1.3037	1.59998	0.924393	1.10345	1.23304	1.08781
2.6864	1.20954	1.99169	0.681988	1.47889	0.996746	0.649755	0.994898	5.87321	5.11282	0.799285	0.34581	0.593656	0.926883	0.998715	0.503506	1.04158	1.09204	2.16132	1.29886	1.61434	0.923732	1.10355	1.23369	1.08516
2.69307	1.21595	1.99601	0.680027	1.48227	0.996669	0.651086	0.996818	5.84709	5.16879	0.802807	0.347484	0.614966	0.928332	0.998325	0.503889	1.04908	1.09227	2.17743	1.29519	1.62864	0.922984	1.10369	1.23423	1.08303
2.69974	1.22216	2.00019	0.678358	1.48624	0.996658	0.652356	0.998946	5.82439	5.22613	0.805977	0.349213	0.639509	0.929767	0.998062	0.504301	1.05655	1.09237	2.19381	1.29268	1.64278	0.922142	1.10388	1.23462	1.08134
2.7064	1.22816	2.00417	0.676939	1.49077	0.996729	0.653545	1.00127	5.80481	5.28506	0.80879	0.35098	0.667205	0.931222	0.997986	0.504747	1.06399	1.09235	2.21024	1.29129	1.65666	0.921198	1.10412	1.23484	1.08003
2.71307	1.23394	2.00791	0.675722	1.4958	0.996894	0.654639	1.00379	5.788	5.34579	0.811246	0.352765	0.69779	0.932731	0.998148	0.505235	1.07139	1.09221	2.22652	1.29096	1.67017	0.920152	1.10443	1.23491	1.07904
2.71974	1.23949	2.01136	0.674667	1.50128	0.997165	0.655622	1.00649	5.77358	5.40851	0.813351	0.354548	0.730825	0.934321	0.998594	0.505774	1.07878	1.09196	2.24247	1.29166	1.68325	0.919003	1.10479	1.23486	1.07829
2.7264	1.24484	2.01454	0.67374	1.50715	0.997545	0.656485	1.00934	5.76117	5.47337	0.815115	0.356305	0.765723	0.936018	0.999361	0.506371	1.08617	1.09162	2.25793	1.29331	1.69583	0.917759	1.10523	1.23476	1.07774
2.73307	1.25001	2.01742	0.672921	1.51333	0.998039	0.657224	1.01232	5.75039	5.54047	0.816553	0.358017	0.801808	0.937838	1.00047	0.507033	1.09356	1.09121	2.27278	1.29588	1.70788	0.916428	1.10576	1.23468	1.07732
2.73974	1.25505	2.02003	0.672198	1.51974	0.998645	0.657841	1.01541	5.74089	5.60986	0.817685	0.359659	0.838365	0.939795	1.00195	0.507765	1.10097	1.09076	2.28695	1.2993	1.71937	0.915032	1.1064	1.23474	1.077
2.7464	1.25999	2.02238	0.671572	1.52631	0.99936	0.658344	1.01857	5.73233	5.68151	0.818532	0.361211	0.874697	0.941892	1.00378	0.508567	1.1084	1.09028	2.3004	1.30353	1.7303	0.913594	1.10717	1.23499	1.07673
2.75307	1.2649	2.02452	0.67105	1.53295	1.00018	0.658747	1.02177	5.72439	5.75534	0.819122	0.362652	0.91016	0.944127	1.00597	0.50944	1.11585	1.08982	2.31314	1.30852	1.74069	0.912141	1.10808	1.23552	1.07649
2.75974	1.26981	2.02647	0.670646	1.53958	1.00109	0.65907	1.02499	5.71679	5.83121	0.81948	0.363964	0.944178	0.946492	1.0085	0.510378	1.12327	1.0894	2.32522	1.31421	1.75058	0.910707	1.10915	1.23634	1.07626
2.7664	1.2748	2.02827	0.670373	1.5461	1.00209	0.659337	1.0282	5.70927	5.90892	0.819636	0.365128	0.976245	0.948972	1.01133	0.511377	1.13064	1.08906	2.33673	1.32054	1.76	0.909326	1.11034	1.23749	1.07604
2.77307	1.27989	2.02998	0.670248	1.55246	1.00316	0.659571	1.03138	5.70158	5.98826	0.819618	0.366133	1.00592	0.95155	1.01443	0.512431	1.13787	1.08883	2.34777	1.32743	1.769	0.908034	1.11165	1.23896	1.07582
2.77974	1.28513	2.03164	0.670279	1.55856	1.0043	0.659797	1.03451	5.69357	6.06899	0.819455	0.366966	1.03283	0.954206	1.01776	0.513533	1.14488	1.08872	2.35847	1.33482	1.77764	0.906864	1.11303	1.24072	1.07561
2.7864	1.29055	2.0333	0.670472	1.56435	1.00548	0.660038	1.03758	5.6851	6.15088	0.819171	0.367621	1.05663	0.956917	1.02125	0.514677	1.15155	1.08877	2.36896	1.34261	1.78597	0.905847	1.11445	1.24275	1.0754
2.79307	1.29617	2.035	0.670814	1.56978	1.0067	0.660315	1.04056	5.67612	6.23373	0.818795	0.368095	1.07706	0.959659	1.02487	0.515858	1.15774	1.08898	2.37939	1.35069	1.79405	0.905009	1.11588	1.24499	1.07522
2.79974	1.30199	2.03682	0.671289	1.57479	1.00794	0.660643	1.04347	5.66671	6.31739	0.818348	0.36839	1.09387	0.962411	1.02854	0.517069	1.16329	1.08937	2.3899	1.35895	1.80192	0.90437	1.11728	1.24741	1.07506
2.8064	1.30802	2.03879	0.671859	1.57936	1.00919	0.661036	1.04629	5.65701	6.40174	0.817853	0.368512	1.10688	0.965148	1.03224	0.518306	1.16803	1.08994	2.40058	1.36725	1.80962	0.903946	1.11863	1.24994	1.07495
2.81307	1.31424	2.04098	0.672482	1.58347	1.01046	0.661505	1.04902	5.64726	6.48677	0.817329	0.36847	1.11595	0.967851	1.0359	0.519563	1.17179	1.09068	2.41155	1.37545	1.81718	0.90374	1.11992	1.25253	1.07489
2.81974	1.32064	2.04343	0.673094	1.58711	1.01172	0.662053	1.05167	5.63783	6.57249	0.816794	0.368281	1.12101	0.970503	1.03951	0.520838	1.1744	1.0916	2.42284	1.38339	1.82462	0.903755	1.12113	1.25513	1.07492
2.8264	1.32719	2.04619	0.673628	1.59029	1.01297	0.662685	1.05423	5.62911	6.659	0.816267	0.367961	1.12201	0.973085	1.04302	0.522129	1.1757	1.09267	2.43451	1.39092	1.83193	0.903981	1.12227	1.25767	1.07505
2.83307	1.33386	2.0493	0.674003	1.59301	1.01421	0.663401	1.05671	5.62152	6.74647	0.815762	0.367532	1.11897	0.975589	1.04644	0.523434	1.17555	1.09388	2.44654	1.39788	1.8391	0.904405	1.12335	1.2601	1.07529
2.83974	1.34063	2.05281	0.674138	1.59533	1.01544	0.6642	1.05913	5.61546	6.8351	0.815294	0.367018	1.11199	0.978005	1.04976	0.524755	1.17386	1.09519	2.4589	1.40411	1.84612	0.905009	1.12438	1.26236	1.07565
2.8464	1.34747	2.05674	0.673943	1.59726	1.01665	0.665079	1.06147	5.61127	6.92518	0.814876	0.366444	1.10117	0.980331	1.05299	0.526093	1.17057	1.09659	2.4715	1.40947	1.85292	0.905769	1.12537	1.26439	1.07615
2.85307	1.35435	2.06113	0.673335	1.59886	1.01784	0.666035	1.06374	5.6092	7.01697	0.814519	0.365836	1.0867	0.982567	1.05616	0.527453	1.16565	1.09804	2.48423	1.41381	1.85946	0.90666	1.12634	1.26617	1.07675
2.85974	1.36125	2.06597	0.672239	1.60018	1.01901	0.667064	1.06596	5.60934	7.11081	0.814235	0.365222	1.06882	0.984714	1.05929	0.528836	1.15915	1.09951	2.49697	1.41703	1.86568	0.907652	1.1273	1.26769	1.07745
2.8664	1.36816	2.07127	0.670586	1.60127	1.02015	0.668162	1.06812	5.61169	7.20702	0.81403	0.364624	1.04779	0.986782	1.06243	0.53025	1.15114	1.10098	2.50954	1.41902	1.87149	0.908719	1.12824	1.26897	1.07821
2.87307	1.37506	2.07702	0.668326	1.60218	1.02127	0.669327	1.07022	5.61606	7.30589	0.813912	0.364068	1.02393	0.98878	1.06562	0.531699	1.14175	1.10241	2.52179	1.41971	1.87683	0.90983	1.12915	1.27007	1.07901
2.87974	1.38195	2.08319	0.665425	1.60296	1.02235	0.670556	1.07227	5.62215	7.40771	0.813882	0.363573	0.997606	0.99072	1.06891	0.533188	1.13116	1.10379	2.53354	1.41905	1.88162	0.910963	1.13002	1.27108	1.0798
2.8864	1.38884	2.08974	0.661864	1.60366	1.02341	0.671846	1.07426	5.62954	7.51275	0.813945	0.363159	0.969204	0.992614	1.07233	0.534725	1.11957	1.10508	2.54462	1.41702	1.88578	0.912093	1.13082	1.27208	1.08055
2.89307	1.39572	2.09662	0.657651	1.60432	1.02443	0.673194	1.0762	5.63768	7.6212	0.814096	0.36284	0.939147	0.994473	1.07593	0.536315	1.10721	1.10629	2.55486	1.41364	1.88926	0.913202	1.13151	1.27315	1.08124
2.89974	1.40261	2.10374	0.652807	1.60496	1.02543	0.674598	1.07809	5.64598	7.73322	0.814337	0.362627	0.90788	0.996307	1.07972	0.537962	1.09433	1.10739	2.56416	1.40895	1.892	0.914272	1.13209	1.27432	1.08184
2.90641	1.40952	2.11104	0.647375	1.60561	1.02638	0.676055	1.07992	5.65376	7.84892	0.814661	0.362527	0.875862	0.998125	1.08373	0.539672	1.0812	1.10837	2.57239	1.40301	1.89395	0.915294	1.13253	1.27564	1.08234
2.91307	1.41646	2.1184	0.641415	1.60628	1.02731	0.677563	1.08169	5.66033	7.96833	0.815064	0.362545	0.84356	0.99993	1.08794	0.541448	1.06807	1.10925	2.57951	1.39591	1.8951	0.916258	1.13284	1.2771	1.08273
2.91974	1.42345	2.12575	0.635	1.60695	1.0282	0.679116	1.0834	5.66497	8.09145	0.815541	0.36268	0.811436	1.00173	1.09235	0.543291	1.05518	1.11	2.58548	1.38778	1.89543	0.917162	1.13302	1.27868	1.08301
2.92641	1.43051	2.13296	0.628211	1.60764	1.02906	0.680711	1.08506	5.66702	8.2182	0.816087	0.362931	0.779936	1.00351	1.09691	0.5452	1.04274	1.11064	2.59033	1.37876	1.89496	0.918001	1.13312	1.28037	1.08318
2.93307	1.43766	2.13996	0.62114	1.60831	1.02989	0.682341	1.08665	5.6658	8.34849	0.816694	0.363291	0.749485	1.00527	1.10157	0.547172	1.03097	1.11118	2.59411	1.36899	1.89373	0.918775	1.13316	1.28212	1.08326
2.93974	1.44489	2.14663	0.613881	1.60894	1.03069	0.683998	1.08819	5.66074	8.48217	0.817359	0.363751	0.720465	1.007	1.10629	0.549201	1.02	1.1116	2.59692	1.35865	1.89177	0.919486	1.13321	1.28392	1.08327
2.94641	1.45223	2.15291	0.606532	1.6095	1.03147	0.685671	1.08966	5.65132	8.61908	0.818075	0.364299	0.69321	1.00869	1.11098	0.551279	1.00997	1.11192	2.59887	1.3479	1.88917	0.92013	1.13331	1.28575	1.08323
2.95307	1.45967	2.15871	0.599185	1.60996	1.03223	0.687351	1.09108	5.63711	8.75905	0.818838	0.364923	0.667993	1.01032	1.11557	0.553396	1.00095	1.11214	2.6001	1.33691	1.88601	0.920707	1.13352	1.28758	1.08316
2.95974	1.46722	2.16399	0.591933	1.61028	1.03296	0.689025	1.09243	5.61781	8.9019	0.819645	0.365606	0.645015	1.01189	1.11998	0.555539	0.993001	1.11228	2.60077	1.32584	1.8824	0.921213	1.1339	1.28942	1.08311
2.96641	1.47485	2.1687	0.584861	1.61041	1.03368	0.690683	1.09374	5.59324	9.04749	0.820493	0.366333	0.6244	1.01336	1.12413	0.557697	0.986119	1.11234	2.60104	1.31485	1.87846	0.921642	1.13447	1.29126	1.08311
2.97307	1.48256	2.17283	0.57805	1.61034	1.03439	0.692315	1.09499	5.56335	9.19568	0.821382	0.367085	0.606193	1.01472	1.12796	0.559854	0.980285	1.11233	2.60108	1.30408	1.87431	0.921988	1.13527	1.2931	1.08318
2.97974	1.49033	2.17636	0.571572	1.61001	1.03507	0.69391	1.0962	5.52827	9.3464	0.82231	0.367844	0.59036	1.01597	1.1314	0.561996	0.975449	1.11227	2.60104	1.29366	1.8701	0.922243	1.13629	1.29496	1.08335
2.98641	1.49814	2.17932	0.56549	1.60941	1.03574	0.695464	1.09737	5.48823	9.49955	0.823281	0.368592	0.576796	1.01709	1.13439	0.564112	0.971539	1.11219	2.60107	1.2837	1.86597	0.922403	1.13752	1.29685	1.08366
2.99307	1.50596	2.18173	0.559861	1.60851	1.0364	0.696973	1.0985	5.44363	9.65516	0.824297	0.369313	0.565338	1.01808	1.13688	0.566188	0.968468	1.1121	2.60129	1.27431	1.86204	0.922462	1.13895	1.29879	1.08411
2.99974	1.51379	2.18362	0.554732	1.6073	1.03703	0.698438	1.0996	5.395	9.81324	0.825363	0.369989	0.555782	1.01893	1.13885	0.568216	0.966141	1.11203	2.60182	1.26556	1.85846	0.922421	1.14051	1.30079	1.08472
3.00641	1.52161	2.18504	0.550137	1.60575	1.03764	0.699862	1.10068	5.34297	9.97384	0.826483	0.370606	0.547898	1.01965	1.14026	0.570189	0.964457	1.11201	2.60273	1.25751	1.85534	0.92228	1.14217	1.30287	1.08549
3.01307	1.52941	2.18603	0.546107	1.60387	1.03823	0.701251	1.10174	5.28823	10.1371	0.827664	0.371153	0.541452	1.02025	1.14111	0.572101	0.963325	1.11204	2.6041	1.25023	1.85279	0.922045	1.14386	1.30502	1.08644
3.01974	1.53721	2.18666	0.542657	1.60167	1.0388	0.702613	1.10279	5.23155	10.303	0.82891	0.371619	0.536217	1.02074	1.14139	0.573953	0.962657	1.11216	2.60595	1.24374	1.85088	0.921725	1.14553	1.30726	1.08754
3.02641	1.54499	2.18697	0.539793	1.59915	1.03934	0.703957	1.10382	5.17368	10.4717	0.830226	0.371999	0.531988	1.02113	1.14111	0.575744	0.962376	1.11236	2.6083	1.23808	1.84969	0.921332	1.14712	1.30956	1.08879
3.03307	1.55279	2.18701	0.537518	1.59634	1.03984	0.705294	1.10486	5.11536	10.6433	0.831617	0.372288	0.528584	1.02146	1.14029	0.577483	0.962425	1.11266	2.61114	1.23326	1.84926	0.920879	1.14859	1.31194	1.09018
3.03974	1.5606	2.18682	0.535813	1.59326	1.04031	0.706634	1.10589	5.05726	10.8178	0.83308	0.372488	0.525855	1.02175	1.13896	0.579175	0.962757	1.11306	2.61443	1.22929	1.84961	0.920385	1.1499	1.31436	1.09169
3.04641	1.56846	2.18644	0.534657	1.58994	1.04075	0.707984	1.10693	4.99998	10.9954	0.834618	0.372601	0.523679	1.02201	1.13714	0.580831	0.963344	1.11355	2.61812	1.22617	1.85074	0.919872	1.15103	1.31683	1.09328
3.05307	1.57636	2.1859	0.534021	1.58643	1.04116	0.709349	1.10797	4.94402	11.1758	0.836225	0.372634	0.521963	1.02228	1.13489	0.58246	0.964176	1.11413	2.62215	1.22389	1.85265	0.919362	1.15197	1.3193	1.09495
3.05974	1.58434	2.18521	0.533862	1.58277	1.04153	0.710731	1.10902	4.88979	11.3591	0.837895	0.372595	0.520632	1.02259	1.13227	0.584075	0.965256	1.11478	2.62647	1.22244	1.8553	0.918882	1.15274	1.32179	1.09665
3.06641	1.5924	2.1844	0.534136	1.57899	1.04186	0.712129	1.11008	4.83754	11.5451	0.839618	0.372497	0.519633	1.02296	1.12933	0.585688	0.966597	1.11549	2.63099	1.22181	1.85863	0.918458	1.15333	1.32424	1.09834
3.07307	1.60054	2.18346	0.534787	1.57515	1.04217	0.713534	1.11115	4.78747	11.7337	0.841379	0.372354	0.518924	1.02341	1.12612	0.587313	0.968225	1.11625	2.63566	1.22197	1.8626	0.918118	1.15377	1.32666	1.10001
3.07974	1.60878	2.1824	0.535758	1.5713	1.04245	0.714937	1.11224	4.73964	11.9245	0.843167	0.372179	0.518473	1.02396	1.12273	0.58896	0.97017	1.11703	2.64043	1.22291	1.86714	0.91789	1.15409	1.329	1.10162
3.08641	1.61711	2.18122	0.536992	1.56748	1.04271	0.71632	1.11335	4.69405	12.1173	0.844964	0.37199	0.518254	1.02462	1.11921	0.590644	0.972468	1.11781	2.64528	1.22459	1.87219	0.917797	1.15431	1.33126	1.10313
3.09307	1.62552	2.17991	0.538426	1.56373	1.04294	0.717665	1.11448	4.65061	12.3115	0.846753	0.371803	0.518245	1.0254	1.11562	0.592375	0.975152	1.11858	2.65017	1.227	1.87769	0.917863	1.15446	1.3334	1.10453
3.09974	1.63399	2.17847	0.540003	1.56011	1.04317	0.718949	1.11564	4.60923	12.5069	0.848523	0.371635	0.518424	1.02631	1.11202	0.594165	0.978255	1.11932	2.65511	1.23011	1.88357	0.918103	1.15457	1.33542	1.10581
3.10641	1.64252	2.17689	0.54167	1.55664	1.04339	0.720148	1.11683	4.56976	12.7029	0.850257	0.371502	0.51877	1.02733	1.10846	0.596022	0.981806	1.12002	2.66012	1.23388	1.88979	0.918533	1.15466	1.33729	1.10694
3.11307	1.65108	2.17518	0.543373	1.55337	1.04361	0.721237	1.11805	4.53204	12.8989	0.851948	0.371417	0.519264	1.02847	1.10499	0.597956	0.985824	1.12065	2.66521	1.23828	1.89628	0.919159	1.15475	1.33902	1.10793
3.11974	1.65965	2.17334	0.545075	1.5503	1.04384	0.722193	1.11932	4.49594	13.0943	0.853593	0.371396	0.519885	1.02971	1.10165	0.599971	0.990323	1.1212	2.67044	1.24327	1.90303	0.91998	1.15484	1.34063	1.10877
3.12641	1.66819	2.17136	0.546739	1.54746	1.04408	0.722995	1.12062	4.46135	13.2887	0.85519	0.37145	0.520614	1.03105	1.09846	0.602068	0.995305	1.12167	2.67583	1.24881	1.90998	0.920991	1.15496	1.34212	1.10946
3.13307	1.67669	2.16927	0.548342	1.54485	1.04433	0.723626	1.12197	4.42817	13.4812	0.856745	0.371588	0.52143	1.03248	1.09545	0.604249	1.00076	1.12205	2.68142	1.25484	1.91712	0.922179	1.15509	1.34353	1.11001
3.13974	1.6851	2.16706	0.549868	1.54246	1.04459	0.724072	1.12336	4.39633	13.6714	0.858269	0.371818	0.522316	1.03397	1.09263	0.606508	1.00668	1.12233	2.68725	1.26131	1.92443	0.923526	1.15525	1.34489	1.11042
3.14641	1.69341	2.16476	0.551309	1.54026	1.04487	0.724325	1.12481	4.3658	13.8585	0.859776	0.372145	0.523254	1.03554	1.09001	0.608834	1.01302	1.12251	2.69333	1.26815	1.93191	0.925007	1.15543	1.34624	1.11068
3.15307	1.7016	2.16238	0.552667	1.53823	1.04516	0.724381	1.12632	4.33655	14.0419	0.861286	0.372572	0.524229	1.03716	1.0876	0.611215	1.01975	1.1226	2.69965	1.27528	1.93953	0.926596	1.15563	1.34759	1.1108
3.15974	1.70962	2.15994	0.553947	1.53631	1.04546	0.724244	1.12788	4.30857	14.2209	0.862817	0.373099	0.525226	1.03883	1.0854	0.613633	1.02683	1.12259	2.70622	1.28262	1.9473	0.928261	1.15586	1.34899	1.11079
3.16641	1.71748	2.15746	0.555164	1.53447	1.04576	0.723921	1.12951	4.28184	14.3949	0.864392	0.373725	0.526233	1.04056	1.08341	0.616065	1.0342	1.1225	2.71299	1.29008	1.95522	0.929968	1.15611	1.35045	1.11064
3.17307	1.72514	2.15494	0.556334	1.53265	1.04607	0.723427	1.13121	4.25636	14.563	0.866033	0.374446	0.52724	1.04234	1.08163	0.618487	1.0418	1.12233	2.71992	1.29758	1.96328	0.931685	1.15638	1.35198	1.11037
3.17974	1.73262	2.15242	0.557476	1.5308	1.04638	0.722779	1.13297	4.23213	14.7247	0.867759	0.375258	0.528237	1.0442	1.08005	0.620871	1.04957	1.12209	2.72693	1.30503	1.97147	0.933379	1.15668	1.3536	1.10999
3.18641	1.73989	2.1499	0.558612	1.52888	1.04669	0.722003	1.13482	4.20912	14.8791	0.869587	0.376153	0.529216	1.04612	1.07866	0.623188	1.05745	1.1218	2.73395	1.31235	1.97981	0.935021	1.157	1.35531	1.10949
3.19307	1.74695	2.1474	0.559764	1.52685	1.04698	0.721126	1.13674	4.18732	15.0255	0.871533	0.377125	0.530172	1.04814	1.07745	0.625409	1.06537	1.12147	2.7409	1.31945	1.98827	0.936584	1.15737	1.35712	1.10888
3.19974	1.75381	2.14492	0.560953	1.52468	1.04727	0.720179	1.13875	4.16671	15.163	0.873606	0.378164	0.531097	1.05026	1.07642	0.627508	1.07329	1.1211	2.74768	1.32627	1.99685	0.938046	1.1578	1.35904	1.10818
3.20641	1.76048	2.14247	0.562202	1.52235	1.04755	0.719196	1.14084	4.14727	15.2909	0.875812	0.379261	0.531989	1.05249	1.07555	0.629458	1.08115	1.12072	2.7542	1.33276	2.00555	0.939389	1.1583	1.36105	1.1074
3.21307	1.76696	2.14006	0.563527	1.51984	1.04782	0.718209	1.14301	4.12898	15.4083	0.878153	0.380407	0.532841	1.05485	1.07483	0.631239	1.0889	1.12033	2.76038	1.33888	2.01434	0.940604	1.15889	1.36316	1.10655
3.21974	1.77327	2.1377	0.564949	1.51716	1.04808	0.717255	1.14527	4.11182	15.5144	0.880625	0.381593	0.533651	1.05736	1.07424	0.632831	1.09651	1.11995	2.76614	1.34459	2.02323	0.941681	1.15959	1.36536	1.10563
3.22641	1.77943	2.13537	0.56648	1.51431	1.04832	0.716363	1.14761	4.09576	15.6083	0.883221	0.382809	0.534412	1.06001	1.07377	0.634223	1.10394	1.11958	2.77143	1.34989	2.0322	0.942622	1.16042	1.36762	1.10466
3.23307	1.78545	2.13308	0.568135	1.5113	1.04856	0.715562	1.15003	4.0808	15.6892	0.885929	0.384046	0.535122	1.06281	1.07339	0.635406	1.11117	1.11924	2.7762	1.35478	2.04125	0.943427	1.16141	1.36995	1.10365
3.23974	1.79135	2.13083	0.56992	1.50817	1.04878	0.714876	1.15252	4.0669	15.7564	0.888737	0.385297	0.535774	1.06576	1.07309	0.636378	1.11819	1.11894	2.78045	1.35927	2.05036	0.944105	1.16255	1.37232	1.10261
3.24641	1.79715	2.12861	0.571839	1.50495	1.04899	0.714322	1.15508	4.05407	15.8093	0.891627	0.386554	0.536365	1.06884	1.07284	0.637141	1.12497	1.11868	2.78417	1.36337	2.05954	0.944664	1.16384	1.37472	1.10155
3.25307	1.80287	2.12642	0.573891	1.50168	1.04919	0.713912	1.15769	4.04228	15.8472	0.894583	0.387813	0.536888	1.07206	1.07264	0.637701	1.13151	1.11847	2.78739	1.36712	2.0688	0.945116	1.16528	1.37714	1.10047
3.25974	1.80852	2.12424	0.576067	1.49841	1.04938	0.71365	1.16033	4.03151	15.8698	0.897583	0.389069	0.537338	1.07538	1.07246	0.638069	1.1378	1.11832	2.79017	1.37055	2.07813	0.945477	1.16684	1.37957	1.09938
3.26641	1.81412	2.12208	0.578357	1.49518	1.04956	0.713533	1.16301	4.02176	15.8768	0.90061	0.390318	0.537711	1.07879	1.07229	0.638259	1.14382	1.11822	2.79256	1.3737	2.08756	0.945759	1.16849	1.38198	1.09828
3.27307	1.81968	2.11991	0.580737	1.49206	1.04974	0.713553	1.16569	4.01299	15.868	0.903643	0.391559	0.538005	1.08227	1.07212	0.638286	1.14956	1.11818	2.79465	1.37659	2.0971	0.945982	1.17019	1.38437	1.09718
3.27974	1.8252	2.11775	0.583183	1.48908	1.04991	0.713693	1.16837	4.0052	15.8436	0.906666	0.392792	0.538215	1.08578	1.07193	0.638167	1.15502	1.11819	2.79654	1.37928	2.10677	0.946159	1.17189	1.38673	1.09607
3.28641	1.83069	2.11559	0.585664	1.48631	1.05007	0.713933	1.17101	3.99837	15.8037	0.909659	0.394016	0.538341	1.0893	1.07172	0.637922	1.16017	1.11827	2.79833	1.38178	2.11661	0.946308	1.17356	1.38905	1.09496
3.29307	1.83615	2.11342	0.588141	1.48379	1.05021	0.714248	1.17361	3.99246	15.7487	0.912607	0.395233	0.538385	1.0928	1.07148	0.637567	1.16501	1.11839	2.80012	1.38414	2.12664	0.946444	1.17516	1.39132	1.09385
3.29974	1.84158	2.11124	0.590571	1.48156	1.05034	0.714611	1.17614	3.98745	15.6791	0.915495	0.396444	0.538348	1.09627	1.0712	0.63712	1.1695	1.11857	2.80203	1.38638	2.1369	0.946581	1.17665	1.39355	1.09275
3.30641	1.84696	2.10907	0.592915	1.47967	1.05046	0.714992	1.17858	3.98331	15.5957	0.918308	0.397651	0.538237	1.09966	1.07089	0.636597	1.17365	1.11878	2.80414	1.38854	2.14743	0.946729	1.17803	1.39575	1.09166
3.31307	1.85229	2.10689	0.595125	1.47813	1.05056	0.715363	1.18092	3.98001	15.4991	0.921036	0.398857	0.53806	1.10297	1.07053	0.636013	1.17741	1.11904	2.80655	1.39063	2.15826	0.946899	1.17928	1.39792	1.09059
3.31974	1.85757	2.10473	0.597158	1.47699	1.05064	0.715697	1.18314	3.97751	15.3904	0.923666	0.400063	0.537827	1.10617	1.07012	0.63538	1.18078	1.11933	2.80931	1.39268	2.16943	0.947092	1.18041	1.40007	1.08954
3.32641	1.86278	2.1026	0.598974	1.47625	1.05071	0.71597	1.18522	3.97576	15.2705	0.926191	0.401271	0.537551	1.10924	1.06965	0.634709	1.18375	1.11965	2.8125	1.39472	2.18097	0.947311	1.18143	1.40223	1.08853
3.33307	1.86792	2.10049	0.60054	1.47594	1.05075	0.71616	1.18717	3.97473	15.1405	0.928604	0.402483	0.537246	1.11218	1.06912	0.634008	1.18629	1.11998	2.81614	1.39676	2.1929	0.947557	1.18235	1.4044	1.08755
3.33974	1.87299	2.09844	0.601827	1.47605	1.05078	0.716253	1.18896	3.97437	15.0016	0.930898	0.403701	0.536931	1.11497	1.06852	0.633285	1.18839	1.12033	2.82026	1.39882	2.20525	0.947824	1.18322	1.4066	1.08663
3.34641	1.87797	2.09645	0.602816	1.4766	1.0508	0.716239	1.1906	3.97464	14.8549	0.933069	0.404927	0.536624	1.1176	1.06784	0.632547	1.19006	1.12068	2.82486	1.40091	2.21804	0.948105	1.18405	1.40884	1.08577
3.35307	1.88289	2.09452	0.603497	1.47756	1.05081	0.716113	1.19211	3.97552	14.7018	0.935114	0.406161	0.536345	1.12007	1.06705	0.631797	1.19127	1.12103	2.82994	1.40304	2.23126	0.948393	1.18488	1.41113	1.08498
3.35974	1.88774	2.09269	0.603874	1.47893	1.05082	0.715874	1.19348	3.97698	14.5433	0.93703	0.407404	0.536115	1.12237	1.06617	0.631044	1.19202	1.12137	2.83545	1.40524	2.24491	0.94868	1.18573	1.41346	1.08427
3.36641	1.89253	2.09094	0.603955	1.48069	1.05083	0.71553	1.19472	3.97899	14.3809	0.938817	0.40866	0.535955	1.12449	1.06516	0.630291	1.19232	1.12169	2.84137	1.4075	2.25899	0.94896	1.18664	1.41585	1.08364
3.37307	1.8973	2.08929	0.603764	1.48281	1.05084	0.715091	1.19586	3.98156	14.2157	0.940477	0.409927	0.535885	1.12645	1.06401	0.629543	1.19218	1.12198	2.84767	1.40984	2.27346	0.94922	1.18761	1.41828	1.0831
3.37974	1.90206	2.08774	0.603328	1.48525	1.05087	0.714573	1.19692	3.98469	14.049	0.942007	0.411208	0.535924	1.12823	1.06273	0.628809	1.19158	1.12224	2.85428	1.41227	2.2883	0.949455	1.18868	1.42076	1.08265
3.38641	1.90685	2.08629	0.602685	1.48799	1.05092	0.713994	1.19791	3.98838	13.8818	0.943412	0.412501	0.536091	1.12984	1.0613	0.628094	1.19056	1.12246	2.86115	1.41478	2.30346	0.949658	1.18985	1.42329	1.08229
3.39307	1.91169	2.08494	0.601876	1.49096	1.05099	0.713377	1.19885	3.99268	13.7154	0.944694	0.413807	0.5364	1.1313	1.05972	0.627405	1.1891	1.12263	2.86825	1.41737	2.3189	0.949824	1.19113	1.42587	1.08203
3.39974	1.91664	2.08368	0.600949	1.49413	1.05109	0.712744	1.19976	3.9976	13.5507	0.945857	0.415124	0.536863	1.13259	1.05799	0.626752	1.18723	1.12275	2.87552	1.42005	2.33455	0.949947	1.19253	1.42849	1.08186
3.40641	1.92172	2.08252	0.599948	1.49745	1.05121	0.71212	1.20067	4.00317	13.3887	0.946907	0.41645	0.53749	1.13374	1.05613	0.626142	1.18496	1.12281	2.88291	1.42281	2.35038	0.950026	1.19405	1.43117	1.08176
3.41307	1.92699	2.08144	0.59892	1.50086	1.05136	0.711528	1.20159	4.00942	13.2303	0.94785	0.417781	0.538286	1.13475	1.05415	0.625585	1.18229	1.12281	2.89039	1.42565	2.36631	0.950059	1.19569	1.43392	1.08175
3.41974	1.93248	2.08043	0.597908	1.50431	1.05153	0.710994	1.20253	4.01638	13.0763	0.948695	0.419113	0.539254	1.13563	1.05208	0.625089	1.17926	1.12275	2.89793	1.42854	2.38229	0.950045	1.19745	1.43674	1.08182
3.42641	1.93823	2.07951	0.596958	1.50775	1.05172	0.710538	1.20352	4.02405	12.9274	0.94945	0.42044	0.54039	1.1364	1.04995	0.624661	1.17587	1.12262	2.90548	1.43146	2.39826	0.94999	1.19932	1.43966	1.08196
3.43307	1.94429	2.07865	0.596104	1.51114	1.05192	0.710184	1.20456	4.03242	12.7842	0.950128	0.421758	0.54169	1.13708	1.04779	0.624311	1.17214	1.12244	2.91303	1.43441	2.41417	0.949895	1.2013	1.44271	1.08216
3.43974	1.9507	2.07786	0.595379	1.51443	1.05215	0.70995	1.20567	4.04145	12.6471	0.950742	0.423058	0.543145	1.13767	1.04566	0.624046	1.16809	1.1222	2.92057	1.43735	2.42997	0.949767	1.20338	1.4459	1.08243
3.44641	1.95749	2.07714	0.594812	1.51759	1.05238	0.709856	1.20684	4.05109	12.5165	0.951306	0.424334	0.544743	1.1382	1.0436	0.623869	1.16374	1.12191	2.92808	1.44026	2.44562	0.949612	1.20554	1.44926	1.08276
3.45307	1.96468	2.07648	0.594423	1.52059	1.05261	0.709917	1.20809	4.06125	12.3927	0.951836	0.425577	0.54647	1.13867	1.04167	0.623787	1.1591	1.12158	2.93557	1.4431	2.46107	0.94944	1.20778	1.45282	1.08315
3.45974	1.97232	2.07589	0.594232	1.5234	1.05285	0.710151	1.20942	4.07183	12.2757	0.952351	0.42678	0.54831	1.13909	1.0399	0.623803	1.15421	1.12123	2.94304	1.44585	2.47631	0.949257	1.21006	1.45659	1.08359
3.46641	1.98042	2.07538	0.59425	1.52601	1.05309	0.710572	1.21084	4.08268	12.1657	0.952867	0.427935	0.550246	1.13948	1.03835	0.623917	1.14907	1.12088	2.95051	1.44846	2.4913	0.949076	1.21238	1.46056	1.08409
3.47307	1.98901	2.07496	0.594487	1.52841	1.05332	0.711194	1.21235	4.09365	12.0627	0.953404	0.429033	0.552259	1.13984	1.03707	0.624129	1.14371	1.12052	2.95799	1.45092	2.50604	0.948904	1.2147	1.46474	1.08464
3.47974	1.9981	2.07462	0.594946	1.5306	1.05355	0.712032	1.21394	4.10456	11.9664	0.953981	0.430068	0.55433	1.14018	1.03609	0.624439	1.13815	1.1202	2.9655	1.45319	2.52051	0.948752	1.21701	1.4691	1.08524
3.48641	2.0077	2.07439	0.595628	1.53257	1.05377	0.7131	1.21561	4.11524	11.8768	0.954616	0.431033	0.556441	1.14049	1.03544	0.624844	1.13241	1.11991	2.97307	1.45524	2.5347	0.948628	1.21929	1.47361	1.08589
3.49307	2.01781	2.07427	0.596528	1.53433	1.05397	0.714412	1.21737	4.12546	11.7934	0.955327	0.431922	0.558573	1.14079	1.03514	0.62534	1.12653	1.11967	2.98072	1.45705	2.54863	0.948539	1.22151	1.47821	1.08658
3.49974	2.02845	2.07428	0.597642	1.5359	1.05417	0.715984	1.2192	4.13506	11.7161	0.95613	0.432731	0.56071	1.14106	1.03522	0.625924	1.12051	1.11951	2.98847	1.45861	2.56229	0.948492	1.22364	1.48286	1.08731
3.50641	2.0396	2.07442	0.598961	1.53728	1.05435	0.717834	1.22109	4.14383	11.6445	0.957039	0.433457	0.562836	1.14131	1.03566	0.626591	1.11439	1.11942	2.99631	1.45989	2.57571	0.948489	1.22569	1.48749	1.08809
3.51308	2.05125	2.07471	0.600473	1.53849	1.05451	0.719974	1.22305	4.15157	11.5781	0.958067	0.434099	0.564937	1.14154	1.03646	0.627338	1.10819	1.11942	3.00426	1.46089	2.58888	0.948534	1.22762	1.49203	1.0889
3.51974	2.06341	2.07516	0.602166	1.53954	1.05465	0.722424	1.22504	4.15813	11.5167	0.959223	0.434656	0.567	1.14173	1.0376	0.62816	1.10193	1.11952	3.01231	1.4616	2.60183	0.948625	1.22942	1.49643	1.08974
3.52641	2.07604	2.07578	0.604023	1.54045	1.05476	0.725197	1.22707	4.16333	11.4599	0.960517	0.435132	0.569016	1.14188	1.03905	0.629054	1.09565	1.1197	3.02044	1.46202	2.61459	0.948764	1.23109	1.50061	1.0906
3.53308	2.08913	2.07657	0.606031	1.54122	1.05485	0.728309	1.2291	4.16705	11.4071	0.961954	0.435531	0.570975	1.14199	1.04077	0.630017	1.08935	1.11998	3.02861	1.46215	2.62716	0.948944	1.23261	1.50452	1.09149
3.53974	2.10266	2.07755	0.60817	1.54188	1.05489	0.731775	1.23112	4.16915	11.3582	0.963541	0.435859	0.572871	1.14205	1.04273	0.631044	1.08308	1.12033	3.03679	1.46201	2.63957	0.949161	1.23399	1.50813	1.09239
3.54641	2.11659	2.0787	0.610422	1.54241	1.0549	0.735607	1.2331	4.16955	11.3128	0.965278	0.436125	0.574699	1.14205	1.04488	0.632134	1.07685	1.12076	3.04493	1.4616	2.65185	0.94941	1.23522	1.51139	1.0933
3.55308	2.13089	2.08004	0.612771	1.54284	1.05485	0.739813	1.23502	4.16818	11.2705	0.967169	0.436339	0.576457	1.142	1.04715	0.633283	1.07069	1.12124	3.05297	1.46093	2.66402	0.949687	1.23631	1.51429	1.09421
3.55974	2.14555	2.08156	0.6152	1.54315	1.05475	0.7444	1.23686	4.16498	11.2311	0.969214	0.436515	0.578144	1.14188	1.04951	0.634488	1.06462	1.12177	3.06083	1.46002	2.6761	0.949982	1.23726	1.51681	1.09512
3.56641	2.16051	2.08326	0.617689	1.54335	1.05459	0.749371	1.23859	4.15994	11.1945	0.971412	0.436665	0.579759	1.14171	1.0519	0.635747	1.05865	1.12232	3.06847	1.45889	2.68814	0.950293	1.23807	1.51895	1.09603
3.57308	2.17575	2.08512	0.620222	1.54343	1.05437	0.754725	1.24019	4.15306	11.1604	0.973762	0.436804	0.581305	1.14147	1.05427	0.637056	1.0528	1.12288	3.07581	1.45755	2.70014	0.950615	1.23876	1.52073	1.09693
3.57974	2.19124	2.08715	0.622784	1.54339	1.05407	0.760458	1.24164	4.14437	11.1286	0.976261	0.436947	0.582786	1.14118	1.05657	0.638412	1.04708	1.12343	3.08278	1.45603	2.71214	0.950946	1.23933	1.52216	1.09782
3.58641	2.20694	2.08933	0.62536	1.54322	1.0537	0.76656	1.24291	4.13391	11.0991	0.978907	0.437111	0.584205	1.14083	1.05876	0.639809	1.04152	1.12394	3.08934	1.45434	2.72417	0.951284	1.2398	1.52328	1.09871
3.59308	2.22282	2.09166	0.627938	1.54293	1.05326	0.773015	1.24399	4.12176	11.0718	0.981695	0.43731	0.585567	1.14043	1.06081	0.641242	1.03612	1.1244	3.09542	1.45249	2.73626	0.951631	1.24017	1.52413	1.09959
3.59974	2.23886	2.09412	0.630505	1.5425	1.05274	0.779808	1.24487	4.10801	11.0466	0.984621	0.43756	0.58688	1.13998	1.06267	0.642707	1.0309	1.1248	3.10101	1.4505	2.74844	0.951988	1.24046	1.52478	1.10047
3.60641	2.25504	2.0967	0.633048	1.54195	1.05216	0.786914	1.24553	4.09275	11.0234	0.987679	0.437874	0.58815	1.1395	1.06434	0.644196	1.02585	1.12512	3.10609	1.4484	2.76074	0.95236	1.24068	1.52527	1.10134
3.61308	2.27132	2.0994	0.635557	1.54127	1.05152	0.794306	1.24598	4.07612	11.0022	0.990862	0.438265	0.589386	1.13898	1.06577	0.645703	1.02101	1.12534	3.11065	1.44618	2.77319	0.952751	1.24084	1.5257	1.10222
3.61974	2.28771	2.1022	0.63802	1.54047	1.05082	0.801954	1.24622	4.05824	10.983	0.994164	0.438744	0.590597	1.13844	1.06697	0.647221	1.01637	1.12546	3.11472	1.44389	2.7858	0.953168	1.24096	1.52614	1.1031
3.62641	2.30419	2.1051	0.640427	1.53956	1.05008	0.809825	1.24625	4.03925	10.9656	0.997574	0.439318	0.591791	1.13789	1.06792	0.648741	1.01197	1.12548	3.11833	1.44152	2.79862	0.953614	1.24104	1.52666	1.10399
3.63308	2.32076	2.10808	0.642766	1.53854	1.04931	0.817882	1.24608	4.0193	10.9501	1.00108	0.439994	0.592979	1.13733	1.0686	0.650258	1.0078	1.12539	3.12155	1.4391	2.81165	0.954097	1.24111	1.52736	1.10487
3.63974	2.33742	2.11113	0.645026	1.53744	1.04851	0.826087	1.24574	3.99854	10.9364	1.00468	0.440775	0.59417	1.13676	1.06903	0.651763	1.0039	1.1252	3.12444	1.43664	2.82493	0.954621	1.24117	1.52829	1.10575
3.64641	2.3542	2.11426	0.647194	1.53625	1.04769	0.8344	1.24524	3.97713	10.9243	1.00836	0.441664	0.595376	1.13619	1.0692	0.653248	1.00029	1.12491	3.12712	1.43418	2.83845	0.955191	1.24123	1.52952	1.10663
3.65308	2.3711	2.11745	0.649257	1.535	1.04686	0.84278	1.24461	3.95521	10.9137	1.01209	0.442659	0.596605	1.13563	1.06911	0.654707	0.996995	1.12453	3.12968	1.43173	2.85224	0.955809	1.2413	1.53109	1.1075
3.65974	2.38815	2.12069	0.651203	1.5337	1.04602	0.851186	1.2439	3.93293	10.9045	1.01588	0.443758	0.597867	1.13508	1.06878	0.656134	0.994036	1.12407	3.13225	1.42932	2.86631	0.956477	1.24139	1.53304	1.10836
3.66641	2.40537	2.12397	0.65302	1.53237	1.04519	0.859577	1.24312	3.91045	10.8965	1.0197	0.444955	0.59917	1.13452	1.06821	0.657521	0.991443	1.12355	3.13495	1.42697	2.88065	0.957193	1.2415	1.53536	1.1092
3.67308	2.42282	2.1273	0.654693	1.53101	1.04436	0.867912	1.24233	3.8879	10.8894	1.02354	0.446244	0.600522	1.13396	1.06742	0.658863	0.989246	1.12297	3.13793	1.4247	2.89527	0.957956	1.24162	1.53806	1.11001
3.67974	2.44052	2.13066	0.656214	1.52966	1.04354	0.876152	1.24157	3.8654	10.8831	1.02738	0.447616	0.60193	1.1334	1.06643	0.660156	0.987471	1.12237	3.14131	1.42256	2.91016	0.958761	1.24178	1.54111	1.1108
3.68641	2.45853	2.13404	0.657572	1.52832	1.04272	0.884256	1.24087	3.84306	10.8772	1.03122	0.449065	0.603396	1.13282	1.06525	0.661394	0.986145	1.12174	3.14523	1.42055	2.92532	0.959603	1.24196	1.54449	1.11155
3.69308	2.4769	2.13744	0.658761	1.527	1.04191	0.892191	1.24029	3.82098	10.8715	1.03502	0.450578	0.604923	1.13221	1.06392	0.662572	0.985295	1.12111	3.14983	1.4187	2.94072	0.960474	1.24216	1.54814	1.11226
3.69974	2.49567	2.14085	0.659778	1.52573	1.0411	0.89992	1.23986	3.79925	10.8656	1.03879	0.452147	0.606513	1.13157	1.06247	0.663688	0.984942	1.1205	3.15522	1.41703	2.95636	0.961365	1.2424	1.55204	1.11293
3.70641	2.51491	2.14426	0.660622	1.52451	1.04029	0.907413	1.23965	3.77792	10.8593	1.0425	0.453762	0.608165	1.13088	1.06091	0.664735	0.985104	1.11992	3.16151	1.41555	2.97221	0.962267	1.24265	1.55614	1.11355
3.71308	2.53467	2.14765	0.661295	1.52336	1.03949	0.914635	1.23968	3.75705	10.8522	1.04614	0.455413	0.609878	1.13013	1.05931	0.665713	0.985798	1.11937	3.1688	1.41429	2.98826	0.96317	1.24294	1.5604	1.11413
3.71974	2.55501	2.15103	0.661805	1.5223	1.03868	0.921562	1.24	3.73668	10.844	1.0497	0.457091	0.611648	1.12932	1.05769	0.666616	0.987034	1.11888	3.17719	1.41325	3.00448	0.964065	1.24324	1.56479	1.11466
3.72641	2.57598	2.15438	0.662159	1.52132	1.03787	0.928169	1.24065	3.71681	10.8344	1.05316	0.458788	0.613472	1.12844	1.0561	0.667443	0.988815	1.11844	3.18674	1.41244	3.02084	0.964939	1.24358	1.5693	1.11515
3.73308	2.59763	2.15768	0.662372	1.52045	1.03706	0.934432	1.24168	3.69745	10.823	1.05652	0.460496	0.615345	1.12747	1.05461	0.668191	0.991143	1.11807	3.19752	1.41186	3.03732	0.965787	1.24394	1.57391	1.11559
3.73974	2.62002	2.16094	0.662455	1.51969	1.03626	0.940335	1.24311	3.67859	10.8096	1.05977	0.462208	0.617262	1.12643	1.05325	0.668858	0.994009	1.11777	3.20958	1.41152	3.05388	0.966599	1.24432	1.57862	1.11598
3.74641	2.64317	2.16413	0.662425	1.51905	1.03546	0.945859	1.24498	3.66021	10.7939	1.0629	0.463918	0.619218	1.1253	1.0521	0.669443	0.997406	1.11753	3.22295	1.41142	3.07051	0.96737	1.24473	1.58344	1.11633
3.75308	2.66713	2.16725	0.662303	1.51854	1.03468	0.950998	1.2473	3.64228	10.7757	1.0659	0.465621	0.621208	1.1241	1.05122	0.669944	1.00131	1.11735	3.23767	1.41154	3.08718	0.968097	1.24518	1.58838	1.11663
3.75974	2.69191	2.17029	0.662105	1.51815	1.03391	0.955741	1.25012	3.62476	10.7547	1.06878	0.467313	0.623225	1.12283	1.05067	0.670361	1.00571	1.11723	3.25375	1.41187	3.10386	0.968779	1.24565	1.59343	1.1169
3.76641	2.71752	2.17323	0.661849	1.51789	1.03317	0.960086	1.25343	3.60759	10.7308	1.07152	0.468989	0.625262	1.12151	1.05052	0.670694	1.01057	1.11716	3.27118	1.41242	3.12051	0.969417	1.24616	1.59862	1.11712
3.77308	2.74398	2.17608	0.661559	1.51776	1.03246	0.964035	1.25725	3.59072	10.7039	1.07413	0.470647	0.627313	1.12014	1.05085	0.670941	1.01585	1.11714	3.28996	1.41315	3.13713	0.970015	1.24671	1.60393	1.1173
3.77974	2.77126	2.17882	0.661249	1.51775	1.03179	0.967592	1.26158	3.5741	10.674	1.07661	0.472283	0.629371	1.11875	1.0517	0.671104	1.02154	1.11715	3.31006	1.41406	3.15368	0.970581	1.24731	1.60936	1.11745
3.78641	2.79936	2.18146	0.66094	1.51785	1.03117	0.970769	1.26643	3.55766	10.641	1.07896	0.473897	0.631429	1.11735	1.05314	0.671182	1.02757	1.11718	3.33145	1.41512	3.17014	0.971121	1.24795	1.61488	1.11755
3.79308	2.82823	2.18398	0.660648	1.51806	1.0306	0.97358	1.27179	3.54135	10.605	1.08119	0.475485	0.633478	1.11596	1.05524	0.671178	1.03392	1.11721	3.35406	1.41631	3.18648	0.971648	1.24864	1.62047	1.11762
3.79974	2.85784	2.18638	0.660391	1.51835	1.0301	0.976046	1.27763	3.52508	10.5661	1.0833	0.477049	0.635513	1.11461	1.05802	0.671088	1.04053	1.11724	3.37783	1.41762	3.20269	0.972171	1.24939	1.6261	1.11766
3.80641	2.88815	2.18868	0.660179	1.51872	1.02966	0.978188	1.28394	3.50881	10.5246	1.0853	0.478586	0.637523	1.11331	1.06153	0.670915	1.04737	1.11725	3.40267	1.419	3.21873	0.972705	1.25018	1.63172	1.11767
3.81308	2.9191	2.19087	0.660027	1.51915	1.0293	0.980032	1.29069	3.49246	10.4806	1.08721	0.480099	0.639501	1.11209	1.06579	0.670658	1.05439	1.11724	3.42846	1.42045	3.2346	0.973261	1.25102	1.6373	1.11765
3.81974	2.95064	2.19296	0.659942	1.5196	1.02901	0.98161	1.29785	3.47597	10.4345	1.08902	0.481588	0.64144	1.11095	1.07081	0.670318	1.06155	1.11718	3.45509	1.42194	3.25026	0.973852	1.2519	1.64279	1.1176
3.82641	2.9827	2.19496	0.65993	1.52008	1.0288	0.982951	1.30537	3.4593	10.3865	1.09075	0.483054	0.643333	1.10992	1.07659	0.669895	1.0688	1.11707	3.48243	1.42343	3.2657	0.974491	1.25282	1.64816	1.11753
3.83308	3.01523	2.19689	0.659991	1.52055	1.02866	0.984088	1.31322	3.44239	10.3372	1.0924	0.4845	0.64517	1.10901	1.08311	0.669388	1.0761	1.11691	3.51032	1.42492	3.28088	0.975188	1.25377	1.65336	1.11745
3.83974	3.04816	2.19877	0.660125	1.521	1.02859	0.985057	1.32133	3.42519	10.2869	1.09399	0.48593	0.646946	1.10822	1.09034	0.668798	1.08342	1.11669	3.53863	1.42637	3.2958	0.975951	1.25474	1.65839	1.11736
3.84641	3.08143	2.2006	0.660326	1.5214	1.0286	0.985892	1.32967	3.40766	10.2361	1.09553	0.487347	0.648652	1.10757	1.09824	0.668126	1.09071	1.1164	3.56719	1.42777	3.31042	0.976788	1.25573	1.66321	1.11726
3.85308	3.115	2.20242	0.660584	1.52175	1.02867	0.986624	1.33816	3.38978	10.1851	1.09701	0.488754	0.650285	1.10705	1.10676	0.667372	1.09795	1.11607	3.59585	1.42911	3.32473	0.977704	1.25673	1.66781	1.11715
3.85974	3.1488	2.20424	0.660889	1.52202	1.0288	0.98729	1.34676	3.37152	10.1345	1.09846	0.490157	0.651836	1.10668	1.11585	0.666538	1.10511	1.11568	3.62445	1.43036	3.33869	0.978702	1.25773	1.67218	1.11705
3.86641	3.18279	2.20608	0.661228	1.52221	1.02898	0.987918	1.3554	3.35287	10.0847	1.09987	0.49156	0.653303	1.10645	1.12543	0.665628	1.11216	1.11524	3.65287	1.43151	3.35227	0.979782	1.25872	1.67634	1.11695
3.87308	3.21692	2.20797	0.661584	1.52232	1.0292	0.988538	1.36403	3.33382	10.036	1.10125	0.492969	0.654682	1.10635	1.13544	0.664645	1.11908	1.11477	3.68096	1.43256	3.36547	0.980942	1.2597	1.6803	1.11685
3.87974	3.25115	2.20993	0.661939	1.52233	1.02946	0.989177	1.37258	3.31437	9.98872	1.10261	0.494389	0.655969	1.1064	1.1458	0.663595	1.12585	1.11427	3.7086	1.4335	3.37823	0.982178	1.26067	1.68406	1.11676
3.88641	3.28544	2.21198	0.662283	1.52224	1.02974	0.989858	1.38101	3.29456	9.9432	1.10395	0.495827	0.657165	1.10657	1.15645	0.662486	1.13246	1.11377	3.7357	1.43433	3.39055	0.983484	1.26161	1.68767	1.11667
3.89308	3.31977	2.21414	0.662598	1.52207	1.03003	0.990602	1.38926	3.27439	9.89966	1.10527	0.49729	0.658268	1.10686	1.16731	0.661326	1.13889	1.11326	3.76218	1.43506	3.40239	0.984853	1.26252	1.69114	1.11659
3.89974	3.3541	2.21642	0.662876	1.52181	1.03034	0.991426	1.39728	3.25392	9.85821	1.10657	0.498785	0.659281	1.10728	1.17833	0.660127	1.14513	1.11277	3.78797	1.43567	3.41373	0.986277	1.2634	1.6945	1.11652
3.90641	3.38841	2.21883	0.663109	1.52147	1.03064	0.992342	1.40504	3.23318	9.81895	1.10786	0.500322	0.660206	1.10781	1.18943	0.658901	1.15118	1.1123	3.81303	1.43618	3.42454	0.987744	1.26424	1.69779	1.11646
3.91308	3.42268	2.22139	0.663293	1.52106	1.03094	0.993363	1.41248	3.21223	9.7819	1.10914	0.501906	0.661046	1.10844	1.20055	0.657663	1.15704	1.11187	3.83734	1.43661	3.43482	0.989245	1.26504	1.70104	1.11641
3.91974	3.45689	2.2241	0.66343	1.5206	1.03124	0.994494	1.41959	3.19113	9.74697	1.1104	0.503546	0.661806	1.10918	1.21166	0.65643	1.16271	1.11149	3.86089	1.43694	3.44455	0.990769	1.26581	1.70427	1.11639
3.92641	3.49103	2.22696	0.663532	1.52009	1.03152	0.995739	1.42633	3.16996	9.71408	1.11165	0.50525	0.662492	1.11001	1.22268	0.65522	1.16818	1.11117	3.88371	1.43721	3.45373	0.992305	1.26653	1.70752	1.11638
3.93308	3.52507	2.22997	0.663608	1.51955	1.03181	0.997098	1.43268	3.1488	9.68302	1.11289	0.507024	0.663109	1.11093	1.23359	0.654052	1.17347	1.11091	3.9058	1.43743	3.46235	0.993843	1.26722	1.7108	1.11641
3.93974	3.55901	2.23312	0.663679	1.519	1.03209	0.998569	1.43863	3.12771	9.6536	1.11412	0.508877	0.663666	1.11194	1.24434	0.652945	1.17857	1.11071	3.92723	1.4376	3.47042	0.995371	1.26787	1.71415	1.11648
3.94641	3.59283	2.23641	0.663769	1.51844	1.03237	1.00015	1.44417	3.1068	9.62555	1.11535	0.510811	0.664169	1.11302	1.25489	0.651918	1.18349	1.11059	3.94803	1.43775	3.47797	0.996884	1.26848	1.71757	1.11659
3.95308	3.62652	2.23981	0.663903	1.51791	1.03267	1.00182	1.44929	3.08613	9.59859	1.11657	0.512832	0.664627	1.11418	1.26521	0.650991	1.18824	1.11054	3.96825	1.43788	3.48503	0.998371	1.26907	1.72106	1.11676
3.95974	3.66007	2.24331	0.664114	1.5174	1.03299	1.00359	1.45401	3.0658	9.57243	1.11779	0.514943	0.665048	1.11541	1.27527	0.650183	1.19283	1.11055	3.98795	1.43801	3.49163	0.999825	1.26964	1.72463	1.11699
3.96641	3.69346	2.24689	0.664434	1.51694	1.03334	1.00543	1.45831	3.04588	9.54676	1.11903	0.517142	0.665441	1.1167	1.28503	0.64951	1.19727	1.11064	4.00719	1.43816	3.49783	1.00124	1.2702	1.72826	1.11728
3.97308	3.72669	2.25052	0.664896	1.51654	1.03372	1.00734	1.46222	3.02645	9.5213	1.12028	0.51943	0.665816	1.11805	1.29447	0.64899	1.20156	1.11078	4.02599	1.43833	3.50368	1.00261	1.27076	1.73196	1.11764
3.97974	3.75973	2.25419	0.665536	1.51621	1.03416	1.0093	1.46575	3.00758	9.49576	1.12155	0.521803	0.666182	1.11946	1.30357	0.648635	1.20572	1.11097	4.04442	1.43854	3.50924	1.00394	1.27132	1.73568	1.11807
3.98641	3.79258	2.25785	0.666382	1.51597	1.03465	1.01129	1.46892	2.98933	9.46989	1.12286	0.524257	0.666548	1.12092	1.3123	0.648461	1.20974	1.11121	4.0625	1.43879	3.5146	1.00522	1.2719	1.73941	1.11855
3.99308	3.82524	2.26147	0.667468	1.51582	1.03521	1.01331	1.47176	2.97176	9.44346	1.12422	0.526785	0.666924	1.12242	1.32062	0.648476	1.21365	1.11148	4.08025	1.43909	3.51983	1.00645	1.27249	1.74311	1.11909
3.99974	3.85768	2.26503	0.668821	1.51577	1.03584	1.01533	1.47429	2.95491	9.41631	1.12563	0.529376	0.667318	1.12396	1.32853	0.64869	1.21745	1.11177	4.09767	1.43945	3.525	1.00763	1.27311	1.74676	1.11969
4.00641	3.88991	2.26848	0.670464	1.51583	1.03655	1.01733	1.47655	2.93883	9.38827	1.12712	0.532022	0.66774	1.12554	1.33599	0.649108	1.22114	1.11206	4.11477	1.43987	3.5302	1.00876	1.27376	1.75032	1.12032
4.01308	3.92193	2.2718	0.672414	1.516	1.03735	1.01931	1.47856	2.92353	9.35927	1.12868	0.534709	0.668198	1.12714	1.34299	0.649736	1.22474	1.11235	4.13152	1.44036	3.53552	1.00985	1.27444	1.75377	1.12098
4.01974	3.95374	2.27494	0.674689	1.5163	1.03824	1.02125	1.48037	2.90905	9.32927	1.13035	0.537423	0.668701	1.12876	1.3495	0.650576	1.22824	1.11262	4.1479	1.4409	3.54104	1.01089	1.27514	1.75709	1.12166
4.02641	3.98535	2.27787	0.677294	1.51671	1.03922	1.02313	1.48201	2.89538	9.29826	1.13212	0.54015	0.669254	1.13039	1.35552	0.651629	1.23167	1.11285	4.16388	1.44151	3.54683	1.01189	1.27587	1.76026	1.12236
4.03308	4.01677	2.28056	0.680233	1.51724	1.04029	1.02494	1.48351	2.88254	9.26632	1.13402	0.542873	0.669865	1.13203	1.36102	0.652892	1.23501	1.11303	4.1794	1.44217	3.55299	1.01285	1.27662	1.76329	1.12307
4.03974	4.04803	2.28298	0.683501	1.51789	1.04147	1.02666	1.48491	2.87052	9.23351	1.13605	0.545576	0.67054	1.13366	1.36599	0.654362	1.23829	1.11314	4.19444	1.44288	3.55958	1.01378	1.27738	1.76619	1.12379
4.04641	4.07915	2.28509	0.68709	1.51865	1.04274	1.02828	1.48625	2.8593	9.20001	1.13823	0.548242	0.671282	1.13528	1.37043	0.656035	1.24149	1.11316	4.20895	1.44363	3.56668	1.01467	1.27814	1.76895	1.1245
4.05308	4.11018	2.28687	0.690983	1.51952	1.0441	1.0298	1.48757	2.84887	9.16597	1.14057	0.550855	0.672096	1.13689	1.37434	0.657904	1.24464	1.11309	4.22288	1.44442	3.57435	1.01554	1.27889	1.77161	1.12521
4.05974	4.14115	2.28829	0.695159	1.52049	1.04555	1.0312	1.48889	2.83918	9.13161	1.14307	0.553396	0.672984	1.13847	1.37771	0.65996	1.24773	1.11291	4.23619	1.44524	3.58264	1.01638	1.27963	1.77419	1.12593
4.06641	4.17213	2.28934	0.69959	1.52157	1.04709	1.03247	1.49024	2.83022	9.09714	1.14574	0.555853	0.673948	1.14002	1.38055	0.662196	1.25076	1.11261	4.24884	1.44607	3.59162	1.0172	1.28034	1.7767	1.12664
4.07308	4.20315	2.28999	0.704241	1.52274	1.04871	1.0336	1.49166	2.82193	9.06279	1.14858	0.558208	0.674986	1.14154	1.38287	0.664599	1.25374	1.11219	4.2608	1.44691	3.60133	1.018	1.28102	1.77919	1.12736
4.07974	4.23429	2.29024	0.70908	1.52399	1.0504	1.03458	1.49315	2.81428	9.02883	1.15161	0.56045	0.676099	1.14302	1.38469	0.66716	1.25668	1.11163	4.27206	1.44774	3.6118	1.01878	1.28166	1.78166	1.12808
4.08641	4.2656	2.29007	0.71406	1.52533	1.05214	1.03542	1.49475	2.80723	8.9955	1.15482	0.562568	0.677282	1.14446	1.38602	0.669864	1.25957	1.11094	4.28258	1.44855	3.62305	1.01954	1.28227	1.78413	1.12881
4.09308	4.29718	2.2895	0.71914	1.52675	1.05394	1.03611	1.49647	2.80071	8.96305	1.15821	0.564552	0.678532	1.14585	1.38688	0.672698	1.26242	1.11012	4.29237	1.44933	3.63511	1.0203	1.28283	1.78662	1.12955
4.09974	4.32907	2.28852	0.724273	1.52823	1.05578	1.03663	1.49831	2.7947	8.9317	1.16178	0.566395	0.679844	1.1472	1.38729	0.675648	1.26522	1.10916	4.3014	1.45008	3.64798	1.02105	1.28336	1.78915	1.1303
4.10641	4.36137	2.28713	0.729412	1.52979	1.05764	1.03699	1.50028	2.78915	8.90167	1.16553	0.568092	0.681211	1.14851	1.38729	0.678698	1.26796	1.10808	4.30969	1.45077	3.66165	1.02179	1.28386	1.79171	1.13106
4.11308	4.39415	2.28537	0.734507	1.53141	1.05953	1.03718	1.50238	2.78401	8.87318	1.16946	0.569641	0.682626	1.14977	1.38689	0.681831	1.27066	1.10689	4.31724	1.4514	3.67612	1.02252	1.28435	1.7943	1.13184
4.11975	4.42746	2.28323	0.739515	1.5331	1.06142	1.03721	1.5046	2.77924	8.84639	1.17355	0.571043	0.68408	1.15099	1.38613	0.685031	1.27329	1.10559	4.32405	1.45196	3.69136	1.02325	1.28483	1.79693	1.13263
4.12641	4.4614	2.28076	0.74439	1.53484	1.06331	1.03707	1.50695	2.77482	8.82145	1.17781	0.572301	0.685565	1.15218	1.38504	0.68828	1.27586	1.10422	4.33015	1.45243	3.70732	1.02398	1.28531	1.7996	1.13343
4.13308	4.49601	2.27797	0.74909	1.53665	1.06518	1.03675	1.5094	2.77071	8.79849	1.18221	0.573419	0.68707	1.15333	1.38364	0.691561	1.27834	1.10277	4.33556	1.45282	3.72397	1.02472	1.2858	1.80229	1.13424
4.13975	4.53135	2.2749	0.753579	1.53851	1.06702	1.03627	1.51194	2.76688	8.7776	1.18676	0.574405	0.688586	1.15446	1.38196	0.694854	1.28073	1.10128	4.3403	1.45312	3.74126	1.02545	1.28632	1.80501	1.13506
4.14641	4.56748	2.27159	0.757824	1.54043	1.06884	1.03562	1.51455	2.76333	8.75886	1.19143	0.57527	0.690102	1.15556	1.38003	0.698142	1.28301	1.09977	4.34441	1.45331	3.75913	1.02619	1.28688	1.80775	1.13587
4.15308	4.60444	2.26806	0.761798	1.5424	1.0706	1.03479	1.51722	2.76003	8.7423	1.19621	0.576024	0.691609	1.15665	1.37788	0.701407	1.28517	1.09826	4.34791	1.45341	3.7775	1.02694	1.28747	1.81049	1.13669
4.15975	4.64226	2.26437	0.765478	1.54443	1.07232	1.0338	1.51992	2.75698	8.72795	1.2011	0.576681	0.693098	1.15773	1.37553	0.704632	1.28718	1.09678	4.35084	1.45339	3.79631	1.02771	1.28812	1.81325	1.13749
4.16641	4.68097	2.26054	0.768849	1.54651	1.07397	1.03263	1.52263	2.75418	8.71579	1.20607	0.577255	0.694558	1.15881	1.37301	0.7078	1.28904	1.09536	4.35325	1.45327	3.81547	1.02848	1.28882	1.816	1.13828
4.17308	4.72058	2.25661	0.771899	1.54864	1.07555	1.03131	1.52533	2.75163	8.7058	1.21111	0.57776	0.695983	1.15989	1.37035	0.710896	1.29071	1.09402	4.35518	1.45304	3.8349	1.02927	1.28958	1.81875	1.13904
4.17975	4.76109	2.25264	0.774621	1.55081	1.07705	1.02981	1.52799	2.74934	8.69795	1.2162	0.578213	0.697364	1.16099	1.36755	0.713907	1.2922	1.09279	4.35668	1.45271	3.85452	1.03007	1.29041	1.82148	1.13978
4.18641	4.80251	2.24864	0.777016	1.55303	1.07848	1.02816	1.53059	2.74734	8.69219	1.22132	0.578629	0.698696	1.16211	1.36466	0.716817	1.29347	1.0917	4.35778	1.45227	3.87423	1.03089	1.2913	1.8242	1.14049
4.19308	4.84482	2.24465	0.779085	1.55528	1.0798	1.02635	1.53312	2.74565	8.68844	1.22646	0.579023	0.699972	1.16325	1.36168	0.719619	1.29452	1.09077	4.35852	1.45173	3.89396	1.03173	1.29225	1.8269	1.14116
4.19975	4.88802	2.24072	0.780834	1.55756	1.08104	1.02438	1.53555	2.74431	8.68664	1.23159	0.579409	0.701189	1.16442	1.35863	0.722302	1.29533	1.09002	4.35897	1.45109	3.91361	1.03259	1.29328	1.82957	1.14179
4.20641	4.93207	2.23686	0.782273	1.55986	1.08217	1.02226	1.53787	2.74334	8.6867	1.2367	0.579801	0.702344	1.16564	1.35555	0.724858	1.2959	1.08948	4.35913	1.45036	3.93311	1.03347	1.29438	1.8322	1.14238
4.21308	4.97697	2.2331	0.783412	1.56217	1.0832	1.02	1.54005	2.7428	8.68854	1.24177	0.580211	0.703436	1.1669	1.35245	0.727282	1.29622	1.08916	4.35906	1.44954	3.95238	1.03437	1.29554	1.8348	1.14294
4.21975	5.02269	2.22948	0.784263	1.56448	1.08411	1.01759	1.54209	2.74273	8.69208	1.24679	0.580647	0.704462	1.16822	1.34933	0.729569	1.29629	1.08908	4.35878	1.44863	3.97135	1.03529	1.29678	1.83737	1.14345
4.22641	5.0692	2.226	0.78484	1.56679	1.08492	1.01504	1.54398	2.74317	8.69723	1.25173	0.58112	0.705423	1.16958	1.34624	0.731718	1.29611	1.08924	4.35831	1.44765	3.98994	1.03622	1.2981	1.83991	1.14393
4.23308	5.1165	2.22268	0.785158	1.56907	1.0856	1.01235	1.54571	2.74419	8.70388	1.25659	0.581634	0.70632	1.17101	1.34318	0.733727	1.29569	1.08966	4.35768	1.4466	4.00812	1.03716	1.29948	1.84242	1.14438
4.23975	5.16455	2.21954	0.785228	1.57132	1.08616	1.00954	1.54727	2.74583	8.71194	1.26134	0.582193	0.707156	1.1725	1.34017	0.735597	1.29504	1.09034	4.35689	1.44547	4.02581	1.03812	1.30094	1.84491	1.14478
4.24641	5.21336	2.21659	0.785067	1.57352	1.0866	1.00659	1.54866	2.74813	8.72131	1.26598	0.582799	0.707933	1.17405	1.33722	0.737329	1.29418	1.09129	4.35596	1.44429	4.04299	1.03909	1.30246	1.84738	1.14516
4.25308	5.26292	2.21382	0.784684	1.57566	1.08691	1.00352	1.54988	2.75115	8.73188	1.27049	0.583451	0.708655	1.17566	1.33436	0.738926	1.29311	1.09249	4.35489	1.44306	4.05962	1.04005	1.30406	1.84985	1.1455
4.25975	5.31323	2.21125	0.784089	1.57773	1.0871	1.00033	1.55092	2.75491	8.74353	1.27487	0.584147	0.709326	1.17734	1.3316	0.740391	1.29186	1.09395	4.35369	1.44177	4.07568	1.04102	1.30572	1.85232	1.14581
4.26641	5.3643	2.20888	0.783298	1.57971	1.08716	0.997032	1.5518	2.75945	8.75613	1.27912	0.58488	0.709951	1.17907	1.32895	0.741727	1.29046	1.09565	4.35236	1.44045	4.09115	1.04199	1.30744	1.8548	1.1461
4.27308	5.41613	2.20669	0.782319	1.58159	1.0871	0.993619	1.55251	2.76479	8.76957	1.28321	0.585645	0.710535	1.18086	1.32642	0.742939	1.28892	1.09758	4.35089	1.43909	4.10604	1.04294	1.30922	1.8573	1.14635
4.27975	5.46875	2.20468	0.781158	1.58337	1.08692	0.990101	1.55307	2.77094	8.7837	1.28716	0.586431	0.711084	1.18269	1.32403	0.744033	1.28728	1.09971	4.34931	1.4377	4.12035	1.04388	1.31105	1.85982	1.14657
4.28641	5.52216	2.20285	0.779826	1.58503	1.08663	0.98648	1.55347	2.77791	8.79838	1.29096	0.587229	0.711604	1.18457	1.32179	0.745013	1.28556	1.10204	4.3476	1.43629	4.13408	1.0448	1.31293	1.86238	1.14676
4.29308	5.57638	2.20118	0.778327	1.58657	1.08622	0.982765	1.55373	2.78568	8.81347	1.29461	0.588027	0.7121	1.18649	1.3197	0.745884	1.28379	1.10454	4.3458	1.43486	4.14726	1.0457	1.31486	1.86497	1.14691
4.29975	5.63142	2.19965	0.77667	1.58798	1.0857	0.978958	1.55385	2.79423	8.8288	1.29811	0.588812	0.71258	1.18844	1.31777	0.74665	1.282	1.10718	4.34391	1.43343	4.15992	1.04657	1.31683	1.86761	1.14703
4.30641	5.68726	2.19826	0.774858	1.58926	1.08508	0.975067	1.55385	2.80353	8.84423	1.30148	0.589569	0.713048	1.1904	1.31601	0.747318	1.28021	1.10993	4.34197	1.43199	4.17208	1.04741	1.31885	1.87028	1.14711
4.31308	5.7439	2.19699	0.772899	1.59041	1.08437	0.971098	1.55374	2.81353	8.85959	1.30471	0.590285	0.713511	1.19238	1.31443	0.747891	1.27845	1.11276	4.34001	1.43056	4.18379	1.04822	1.3209	1.873	1.14716
4.31975	5.8013	2.19582	0.770795	1.59141	1.08356	0.967057	1.55353	2.82418	8.87475	1.30781	0.590945	0.713974	1.19435	1.31302	0.748376	1.27674	1.11565	4.33808	1.42914	4.19508	1.04899	1.32299	1.87577	1.14717
4.32641	5.85942	2.19473	0.768553	1.59228	1.08267	0.962954	1.55322	2.83542	8.88955	1.3108	0.591533	0.714442	1.19632	1.31179	0.748775	1.27509	1.11856	4.33621	1.42774	4.20599	1.04972	1.3251	1.87858	1.14714
4.33308	5.91819	2.19371	0.766179	1.59301	1.08171	0.958795	1.55285	2.84716	8.90387	1.31367	0.592036	0.71492	1.19827	1.31074	0.749094	1.27353	1.12146	4.33446	1.42636	4.21657	1.05041	1.32724	1.88144	1.14707
4.33975	5.9775	2.19273	0.763677	1.5936	1.08068	0.95459	1.55241	2.85933	8.91758	1.31645	0.59244	0.715412	1.20018	1.30988	0.749337	1.27207	1.12433	4.33288	1.42501	4.22686	1.05105	1.32939	1.88437	1.14696
4.34641	6.03725	2.19179	0.761054	1.59405	1.07958	0.95035	1.55192	2.87183	8.93057	1.31914	0.592732	0.715922	1.20206	1.30919	0.749507	1.27072	1.12714	4.33154	1.4237	4.23691	1.05166	1.33156	1.88735	1.14681
4.35308	6.09729	2.19087	0.758315	1.59436	1.07843	0.946083	1.55141	2.88458	8.94274	1.32175	0.592899	0.716451	1.2039	1.30868	0.749609	1.26948	1.12985	4.33049	1.42243	4.24676	1.05222	1.33372	1.8904	1.14664
4.35975	6.15746	2.18994	0.755469	1.59455	1.07723	0.9418	1.55088	2.89748	8.95402	1.3243	0.59293	0.717003	1.20567	1.30835	0.749647	1.26836	1.13245	4.32977	1.42121	4.25645	1.05274	1.33588	1.89354	1.14643
4.36641	6.21759	2.189	0.752521	1.5946	1.07599	0.937513	1.55036	2.91042	8.96434	1.3268	0.592817	0.717578	1.20738	1.3082	0.749623	1.26735	1.13491	4.32943	1.42004	4.26604	1.05323	1.33802	1.89677	1.14619
4.37308	6.27749	2.18803	0.749481	1.59453	1.07471	0.933233	1.54986	2.92333	8.97366	1.32926	0.592553	0.718176	1.20902	1.30822	0.749542	1.26646	1.13722	4.32951	1.41894	4.27555	1.05367	1.34014	1.9001	1.14593
4.37975	6.33695	2.18702	0.746357	1.59434	1.0734	0.928971	1.54941	2.93611	8.98197	1.33169	0.592131	0.718797	1.21058	1.30841	0.749406	1.26568	1.13936	4.33001	1.4179	4.28502	1.05408	1.34223	1.90354	1.14565
4.38641	6.39579	2.18595	0.743158	1.59405	1.07206	0.924739	1.54902	2.94867	8.98925	1.33411	0.591547	0.719441	1.21207	1.30876	0.749219	1.26499	1.14132	4.33095	1.41693	4.2945	1.05445	1.34428	1.90712	1.14536
4.39308	6.45382	2.18482	0.739897	1.59366	1.0707	0.920546	1.54871	2.96093	8.9955	1.33654	0.590801	0.720103	1.21346	1.30928	0.748983	1.2644	1.14309	4.33232	1.41604	4.30402	1.0548	1.34629	1.91083	1.14507
4.39975	6.51087	2.18363	0.736583	1.59318	1.06933	0.916401	1.54851	2.97283	9.00076	1.33897	0.589892	0.720784	1.21477	1.30995	0.748701	1.26389	1.14468	4.33408	1.41523	4.31361	1.05511	1.34826	1.91469	1.14477
4.40641	6.56681	2.18235	0.733228	1.59263	1.06795	0.912315	1.54844	2.98431	9.00506	1.34143	0.588823	0.721478	1.21598	1.31077	0.748375	1.26346	1.14607	4.33618	1.4145	4.3233	1.05541	1.35017	1.91871	1.14449
4.41308	6.62151	2.181	0.729844	1.59202	1.06657	0.908295	1.54852	2.99532	9.00844	1.34392	0.587599	0.722182	1.21711	1.31174	0.748007	1.2631	1.14728	4.33857	1.41387	4.33312	1.05568	1.35204	1.92288	1.14423
4.41975	6.67492	2.17957	0.726446	1.59138	1.06519	0.904348	1.54876	3.00583	9.01097	1.34646	0.586227	0.722893	1.21814	1.31284	0.747601	1.26281	1.14831	4.34116	1.41332	4.34309	1.05593	1.35386	1.92721	1.14399
4.42641	6.727	2.17805	0.723048	1.59071	1.06381	0.900481	1.5492	3.0158	9.0127	1.34906	0.584714	0.723605	1.21908	1.31406	0.747156	1.26258	1.14917	4.34387	1.41286	4.35324	1.05618	1.35563	1.93171	1.14379
4.43308	6.77776	2.17646	0.719663	1.59004	1.06244	0.896697	1.54984	3.02522	9.01372	1.35172	0.583073	0.724313	1.21993	1.3154	0.746676	1.26242	1.14987	4.34659	1.41251	4.36359	1.05642	1.35736	1.93636	1.14363
4.43975	6.82727	2.17479	0.716307	1.58939	1.06109	0.892998	1.5507	3.03409	9.01409	1.35444	0.581315	0.725013	1.22069	1.31683	0.746162	1.26233	1.15042	4.34922	1.41224	4.37416	1.05666	1.35904	1.94116	1.14351
4.44641	6.87564	2.17305	0.712996	1.58877	1.05976	0.889389	1.55181	3.04241	9.0139	1.35725	0.579455	0.7257	1.22137	1.31835	0.745614	1.26232	1.15084	4.35163	1.41208	4.38495	1.05691	1.36067	1.9461	1.14345
4.45308	6.92301	2.17125	0.709747	1.58822	1.05846	0.885867	1.55317	3.05019	9.01321	1.36014	0.577508	0.72637	1.22197	1.31993	0.745036	1.26239	1.15113	4.35373	1.41201	4.396	1.05717	1.36227	1.95117	1.14344
4.45975	6.96956	2.16941	0.706575	1.58774	1.05718	0.882432	1.5548	3.05744	9.01213	1.36311	0.57549	0.727018	1.22249	1.32156	0.744429	1.26256	1.15132	4.35539	1.41204	4.40729	1.05745	1.36382	1.95636	1.14349
4.46641	7.01552	2.16752	0.703498	1.58736	1.05594	0.879082	1.55669	3.0642	9.0107	1.36617	0.573418	0.72764	1.22294	1.32321	0.743792	1.26284	1.15142	4.35653	1.41216	4.41884	1.05775	1.36533	1.96165	1.14361
4.47308	7.06111	2.16562	0.700534	1.5871	1.05474	0.875814	1.55887	3.07049	9.00903	1.36932	0.57131	0.728233	1.22332	1.32487	0.743131	1.26324	1.15145	4.35706	1.41238	4.43065	1.0581	1.3668	1.96703	1.1438
4.47975	7.10658	2.16371	0.697698	1.58697	1.05358	0.872623	1.56133	3.07634	9.00717	1.37256	0.569184	0.728793	1.22365	1.3265	0.742443	1.26379	1.15141	4.3569	1.41268	4.44271	1.05849	1.36823	1.9725	1.14405
4.48641	7.15219	2.16181	0.695008	1.58698	1.05247	0.869505	1.56406	3.0818	9.0052	1.37588	0.567058	0.72932	1.22392	1.32807	0.741733	1.26449	1.15131	4.35599	1.41306	4.45502	1.05892	1.36962	1.97804	1.14438
4.49308	7.19819	2.15994	0.692481	1.58716	1.05141	0.866452	1.56707	3.08689	9.00319	1.3793	0.56495	0.729811	1.22414	1.32956	0.741001	1.26537	1.15118	4.3543	1.41353	4.46755	1.05942	1.37098	1.98363	1.14476
4.49975	7.24482	2.15813	0.690131	1.5875	1.05041	0.863459	1.57035	3.09166	9.00119	1.38279	0.562876	0.730264	1.22432	1.33094	0.74025	1.26643	1.15101	4.3518	1.41407	4.48029	1.05998	1.3723	1.98927	1.1452
4.50641	7.29231	2.15639	0.687973	1.58802	1.04947	0.860518	1.57388	3.09614	8.99926	1.38637	0.560852	0.730681	1.22447	1.33218	0.739482	1.2677	1.15082	4.34849	1.41468	4.49321	1.06061	1.37358	1.99495	1.1457
4.51308	7.34088	2.15474	0.68602	1.58873	1.0486	0.857622	1.57766	3.10039	8.99746	1.39002	0.558892	0.73106	1.2246	1.33324	0.738699	1.26917	1.15061	4.34436	1.41536	4.50629	1.06131	1.37483	2.00065	1.14625
4.51975	7.39073	2.15321	0.684288	1.58962	1.0478	0.854766	1.58166	3.10445	8.99583	1.39374	0.557011	0.731404	1.22472	1.33409	0.737903	1.27087	1.15038	4.33943	1.41608	4.5195	1.0621	1.37605	2.00636	1.14682
4.52641	7.44202	2.15181	0.682783	1.5907	1.04708	0.851939	1.58586	3.10836	8.99441	1.39752	0.55522	0.731714	1.22483	1.33471	0.737097	1.2728	1.15013	4.3337	1.41686	4.53279	1.06297	1.37723	2.01207	1.14743
4.53308	7.49492	2.15058	0.681518	1.59197	1.04644	0.849138	1.59024	3.11216	8.99325	1.40136	0.553528	0.731993	1.22494	1.33507	0.736284	1.27495	1.14988	4.32718	1.41769	4.54611	1.06392	1.37839	2.01776	1.14804
4.53975	7.54958	2.14952	0.6805	1.59342	1.04589	0.846354	1.59478	3.11589	8.99238	1.40525	0.551943	0.732244	1.22507	1.33513	0.735466	1.27733	1.1496	4.31987	1.41855	4.55945	1.06496	1.37952	2.02343	1.14865
4.54641	7.60612	2.14867	0.679734	1.59504	1.04542	0.843582	1.59944	3.1196	8.99183	1.40918	0.550472	0.732471	1.22522	1.33488	0.734646	1.27993	1.14931	4.31175	1.41943	4.57274	1.06609	1.38062	2.02905	1.14924
4.55308	7.66467	2.14804	0.679226	1.59683	1.04505	0.840818	1.60419	3.12333	8.99161	1.41314	0.549119	0.732678	1.22539	1.33429	0.733826	1.28275	1.149	4.30277	1.42035	4.58595	1.06731	1.38171	2.03461	1.14981
4.55975	7.72536	2.14765	0.678978	1.59878	1.04478	0.838055	1.60901	3.12712	8.99175	1.41713	0.547885	0.732869	1.22561	1.33334	0.733011	1.28577	1.14866	4.29287	1.42128	4.59903	1.06863	1.38277	2.04009	1.15034
4.56641	7.7883	2.1475	0.678988	1.60087	1.0446	0.835293	1.61385	3.13101	8.99224	1.42114	0.546771	0.73305	1.22587	1.33202	0.732202	1.28898	1.14829	4.28194	1.42223	4.61195	1.07004	1.38383	2.04548	1.15082
4.57308	7.85363	2.14763	0.679257	1.60308	1.04452	0.832527	1.61868	3.13504	8.99309	1.42516	0.545775	0.733225	1.22618	1.33032	0.731404	1.29237	1.14789	4.26987	1.42318	4.62465	1.07156	1.38487	2.05074	1.15124
4.57975	7.92148	2.14803	0.679781	1.60541	1.04455	0.829758	1.62348	3.13923	8.9943	1.42918	0.544895	0.733402	1.22655	1.32823	0.730618	1.29592	1.14744	4.25649	1.42414	4.63711	1.07318	1.38591	2.05587	1.15159
4.58641	7.99201	2.14871	0.680555	1.60782	1.04467	0.826984	1.6282	3.14363	8.99584	1.43319	0.544125	0.733584	1.22698	1.32574	0.729848	1.2996	1.14695	4.24161	1.42511	4.6493	1.07492	1.38695	2.06084	1.15188
4.59308	8.0654	2.14968	0.68157	1.6103	1.04488	0.824207	1.63281	3.14826	8.99768	1.4372	0.543461	0.733778	1.22748	1.32287	0.729098	1.30341	1.1464	4.22504	1.42608	4.66119	1.07679	1.38799	2.06565	1.1521
4.59975	8.14187	2.15095	0.68282	1.61284	1.04519	0.82143	1.63728	3.15315	8.9998	1.44118	0.542894	0.733988	1.22804	1.31962	0.728369	1.30732	1.1458	4.20659	1.42706	4.67276	1.0788	1.38904	2.07027	1.15225
4.60641	8.22163	2.1525	0.684295	1.6154	1.04559	0.818655	1.64158	3.15833	9.00217	1.44514	0.542419	0.734221	1.22868	1.31599	0.727665	1.3113	1.14512	4.18605	1.42803	4.68399	1.08098	1.3901	2.07471	1.15233
4.61308	8.30495	2.15434	0.68598	1.61796	1.04606	0.815888	1.64569	3.16382	9.00471	1.44906	0.542027	0.734481	1.22938	1.312	0.726989	1.31535	1.14439	4.16327	1.42902	4.69489	1.08337	1.39118	2.07895	1.15234
4.61975	8.39213	2.15646	0.687863	1.62051	1.04661	0.813134	1.64958	3.16964	9.00739	1.45294	0.54171	0.734772	1.23015	1.30767	0.726342	1.31943	1.14357	4.13815	1.43001	4.70544	1.08599	1.39229	2.08298	1.15229
4.62641	8.48348	2.15884	0.689929	1.62301	1.04721	0.8104	1.65323	3.1758	9.01014	1.45679	0.541459	0.735098	1.23098	1.30303	0.72573	1.32354	1.14268	4.11065	1.43102	4.71565	1.08889	1.39342	2.08683	1.15218
4.63308	8.57936	2.16148	0.692165	1.62546	1.04788	0.807693	1.65662	3.18232	9.01288	1.46058	0.541268	0.735463	1.23187	1.2981	0.725153	1.32765	1.14171	4.08084	1.43204	4.72554	1.09213	1.39458	2.0905	1.15202
4.63975	8.68014	2.16436	0.694553	1.62783	1.04858	0.805021	1.65973	3.18922	9.01554	1.46432	0.541128	0.73587	1.23282	1.29292	0.724616	1.33174	1.14065	4.04888	1.43309	4.73513	1.09578	1.39578	2.09401	1.15181
4.64641	8.78625	2.16746	0.697076	1.63009	1.04932	0.802393	1.66257	3.19649	9.01804	1.46801	0.541032	0.736319	1.23382	1.2875	0.72412	1.3358	1.13951	4.01507	1.43416	4.74444	1.0999	1.39701	2.09739	1.15157
4.65308	8.89811	2.17075	0.699718	1.63225	1.05009	0.799817	1.66511	3.20415	9.02031	1.47164	0.540974	0.736814	1.23487	1.2819	0.723669	1.33982	1.13828	3.97981	1.43527	4.75351	1.10459	1.39828	2.10065	1.15129
4.65975	9.01613	2.17422	0.702458	1.63428	1.05086	0.797304	1.66736	3.2122	9.02223	1.47522	0.540949	0.737354	1.23596	1.27614	0.723264	1.34379	1.13696	3.94362	1.43643	4.76238	1.10993	1.39958	2.10385	1.15099
4.66641	9.14077	2.17783	0.705282	1.63617	1.05164	0.794861	1.66932	3.22065	9.02377	1.47875	0.540952	0.737939	1.23708	1.27027	0.722909	1.34768	1.13555	3.90712	1.43763	4.77109	1.11602	1.40092	2.10701	1.15067
4.67308	9.27247	2.18156	0.708171	1.63792	1.05241	0.792499	1.67098	3.2295	9.0248	1.48222	0.540979	0.73857	1.23824	1.26433	0.722608	1.3515	1.13406	3.87099	1.43889	4.77968	1.12296	1.40229	2.11018	1.15034
4.67975	9.41163	2.18538	0.711108	1.63954	1.05317	0.790227	1.67237	3.23875	9.02526	1.48564	0.541026	0.739243	1.23941	1.25835	0.722362	1.35524	1.13248	3.83595	1.44022	4.7882	1.13085	1.40369	2.11341	1.15
4.68641	9.55867	2.18926	0.714077	1.64102	1.05391	0.788051	1.67349	3.24841	9.02507	1.48902	0.541093	0.739959	1.2406	1.25238	0.722175	1.35889	1.13082	3.80273	1.44161	4.79673	1.13977	1.40512	2.11674	1.14967
4.69308	9.71392	2.19315	0.717062	1.64237	1.05461	0.785979	1.67435	3.25847	9.02417	1.49235	0.541178	0.740713	1.24181	1.24645	0.72205	1.36244	1.12907	3.77203	1.44309	4.8053	1.1498	1.40656	2.12022	1.14935
4.69975	9.87769	2.19704	0.720048	1.6436	1.05529	0.784018	1.67497	3.26893	9.02251	1.49565	0.54128	0.741505	1.24302	1.2406	0.721991	1.36589	1.12724	3.74449	1.44465	4.81397	1.16101	1.40802	2.12388	1.14904
4.70642	10.0502	2.20088	0.723021	1.64473	1.05592	0.782173	1.67536	3.27978	9.02002	1.49892	0.541401	0.74233	1.24422	1.23487	0.721998	1.36924	1.12533	3.72069	1.4463	4.82281	1.17343	1.4095	2.12777	1.14876
4.71308	10.2317	2.20465	0.725969	1.64576	1.05652	0.780446	1.67554	3.29103	9.01669	1.50216	0.54154	0.743186	1.24543	1.2293	0.722075	1.37248	1.12335	3.70107	1.44806	4.83186	1.18708	1.41097	2.1319	1.1485
4.71975	10.4221	2.2083	0.728877	1.64671	1.05707	0.778842	1.67554	3.30267	9.01248	1.50539	0.541699	0.74407	1.24662	1.22391	0.722225	1.37562	1.12129	3.68601	1.44992	4.84118	1.20197	1.41245	2.1363	1.14829
4.72642	10.6213	2.21182	0.731735	1.64761	1.05758	0.77736	1.67538	3.31467	9.00738	1.50861	0.54188	0.744979	1.24779	1.21874	0.722451	1.37865	1.11916	3.67574	1.45188	4.85082	1.21805	1.41392	2.14098	1.14811
4.73308	10.8294	2.21516	0.734533	1.64846	1.05805	0.776002	1.67508	3.32704	9.00142	1.51184	0.542085	0.745909	1.24895	1.21381	0.722753	1.38158	1.11697	3.67038	1.45396	4.86083	1.23527	1.41538	2.14595	1.14798
4.73975	11.0458	2.2183	0.73726	1.64928	1.05847	0.774767	1.67466	3.33975	8.9946	1.51507	0.542316	0.746857	1.25009	1.20916	0.723135	1.38441	1.11472	3.66997	1.45616	4.87126	1.25354	1.41683	2.1512	1.1479
4.74642	11.2701	2.22121	0.739907	1.65009	1.05886	0.773651	1.67414	3.3528	8.98696	1.51832	0.542575	0.747821	1.2512	1.20479	0.723596	1.38714	1.11241	3.67443	1.45848	4.88215	1.27275	1.41826	2.15672	1.14788
4.75308	11.5018	2.22387	0.742465	1.65089	1.05922	0.772654	1.67356	3.36616	8.97855	1.52159	0.542863	0.748798	1.25229	1.20074	0.724138	1.38977	1.11005	3.68359	1.46092	4.89352	1.29278	1.41968	2.16249	1.14791
4.75975	11.7399	2.22625	0.744923	1.65171	1.05955	0.771769	1.67293	3.37982	8.96942	1.5249	0.543184	0.749787	1.25334	1.19701	0.724761	1.3923	1.10763	3.6972	1.46349	4.90541	1.31348	1.42107	2.1685	1.148
4.76642	11.9836	2.22834	0.747274	1.65254	1.05986	0.770994	1.67227	3.39378	8.95965	1.52824	0.543536	0.750784	1.25437	1.19363	0.725464	1.39474	1.10517	3.71498	1.46619	4.91786	1.33467	1.42245	2.17471	1.14815
4.77308	12.2318	2.23012	0.749508	1.6534	1.06015	0.770326	1.67162	3.40799	8.94931	1.53164	0.543923	0.751788	1.25536	1.1906	0.726247	1.3971	1.10267	3.73656	1.46901	4.93087	1.3562	1.4238	2.18111	1.14837
4.77975	12.4832	2.23158	0.751614	1.65429	1.06045	0.769761	1.67098	3.42247	8.93848	1.53509	0.544343	0.752797	1.25631	1.18794	0.727107	1.39938	1.10013	3.76154	1.47196	4.94445	1.37787	1.42512	2.18766	1.14864
4.78642	12.7363	2.2327	0.753585	1.65521	1.06074	0.769294	1.67038	3.43719	8.92725	1.5386	0.544798	0.753809	1.25723	1.18565	0.728043	1.40159	1.09755	3.78951	1.47504	4.95861	1.39949	1.42642	2.19435	1.14898
4.79308	12.9897	2.23347	0.755412	1.65618	1.06106	0.768923	1.66983	3.45214	8.91571	1.54217	0.545285	0.754821	1.25811	1.18373	0.729051	1.40373	1.09495	3.82002	1.47824	4.97336	1.42088	1.42768	2.20114	1.14939
4.79975	13.2418	2.2339	0.757084	1.65718	1.06139	0.768644	1.66937	3.46732	8.90395	1.54582	0.545804	0.755834	1.25895	1.1822	0.730127	1.40581	1.09231	3.85262	1.48156	4.98868	1.44185	1.42891	2.20804	1.14985
4.80642	13.491	2.23399	0.758592	1.65821	1.06177	0.768457	1.66898	3.48271	8.89205	1.54954	0.546353	0.756843	1.25975	1.18106	0.73127	1.40784	1.08966	3.88687	1.48501	5.00456	1.46222	1.43009	2.21501	1.15038
4.81308	13.7355	2.23373	0.759928	1.65928	1.06218	0.768359	1.6687	3.49833	8.8801	1.55333	0.546928	0.757849	1.26052	1.18031	0.732471	1.40983	1.08698	3.9223	1.48857	5.02097	1.4818	1.43124	2.22207	1.15097
4.81975	13.9736	2.23312	0.761083	1.66037	1.06265	0.768353	1.66854	3.51416	8.86817	1.5572	0.547529	0.758847	1.26125	1.17995	0.733727	1.41179	1.08428	3.9585	1.49226	5.03789	1.50043	1.43234	2.2292	1.15161
4.82642	14.2039	2.23218	0.762049	1.66149	1.06318	0.768436	1.66849	3.5302	8.85632	1.56114	0.548149	0.759836	1.26194	1.17998	0.735032	1.41371	1.08157	3.99504	1.49606	5.05527	1.51794	1.43339	2.2364	1.15232
4.83308	14.4247	2.2309	0.762819	1.66262	1.06377	0.768612	1.66857	3.54647	8.84462	1.56516	0.548786	0.760815	1.26259	1.18041	0.73638	1.41562	1.07884	4.03153	1.49997	5.07309	1.5342	1.43439	2.2437	1.15308
4.83975	14.6346	2.22931	0.763386	1.66376	1.06444	0.768883	1.66878	3.56295	8.83311	1.56925	0.549435	0.761779	1.26321	1.18123	0.737764	1.41752	1.07611	4.0676	1.504	5.09127	1.54905	1.43534	2.25108	1.1539
4.84642	14.8324	2.22741	0.763748	1.6649	1.06518	0.769251	1.66911	3.57967	8.82182	1.57341	0.550093	0.762727	1.26379	1.18245	0.739179	1.41941	1.07336	4.10291	1.50813	5.10978	1.56238	1.43623	2.25857	1.15477
4.85308	15.017	2.22521	0.7639	1.66604	1.06599	0.76972	1.66958	3.59661	8.81078	1.57764	0.550753	0.763655	1.26434	1.18406	0.740616	1.42131	1.07061	4.13716	1.51238	5.12856	1.57409	1.43706	2.26618	1.15569
4.85975	15.1875	2.22272	0.763842	1.66715	1.06688	0.770294	1.67018	3.61379	8.8	1.58192	0.551414	0.764562	1.26485	1.18607	0.74207	1.42321	1.06785	4.17007	1.51672	5.14752	1.58407	1.43784	2.27392	1.15666
4.86642	15.3433	2.21997	0.763572	1.66823	1.06785	0.770978	1.67089	3.63119	8.78948	1.58626	0.552069	0.765443	1.26533	1.18847	0.743535	1.42512	1.06508	4.20139	1.52117	5.16662	1.59225	1.43856	2.28179	1.15768
4.87308	15.4836	2.21695	0.763094	1.66927	1.06889	0.771775	1.67172	3.64882	8.7792	1.59065	0.552715	0.766297	1.26578	1.19127	0.745001	1.42704	1.06231	4.23093	1.52572	5.18576	1.59857	1.43923	2.28982	1.15873
4.87975	15.6084	2.2137	0.762409	1.67027	1.07	0.772691	1.67264	3.66668	8.76916	1.59508	0.553348	0.767121	1.26621	1.19447	0.746465	1.42897	1.05954	4.25851	1.53037	5.20487	1.60299	1.43985	2.298	1.15983
4.88642	15.7173	2.21021	0.761525	1.67121	1.07118	0.773727	1.67366	3.68476	8.75933	1.59955	0.553966	0.767912	1.26661	1.19806	0.747917	1.43092	1.05676	4.28401	1.53511	5.22388	1.60547	1.44042	2.30635	1.16096
4.89308	15.8104	2.20651	0.760449	1.67208	1.07241	0.774888	1.67476	3.70303	8.74965	1.60405	0.554565	0.768667	1.26699	1.20204	0.749355	1.43288	1.05398	4.30734	1.53995	5.24269	1.60601	1.44094	2.31485	1.16212
4.89975	15.8879	2.20261	0.75919	1.67288	1.07371	0.776175	1.67593	3.72151	8.74012	1.60857	0.555144	0.769386	1.26735	1.20642	0.75077	1.43485	1.05119	4.32842	1.54487	5.26122	1.60461	1.44142	2.32352	1.16332
4.90642	15.9499	2.19851	0.757756	1.67361	1.07505	0.77759	1.67715	3.74016	8.73069	1.6131	0.555702	0.770064	1.26769	1.21118	0.752158	1.43682	1.0484	4.34724	1.54987	5.27939	1.6013	1.44187	2.33234	1.16453
4.91308	15.9967	2.19424	0.756164	1.67425	1.07643	0.779133	1.67841	3.75897	8.72133	1.61764	0.556237	0.770702	1.26802	1.21632	0.753512	1.4388	1.04561	4.36381	1.55495	5.29711	1.5961	1.44229	2.3413	1.16576
4.91975	16.0289	2.18981	0.754425	1.6748	1.07785	0.780801	1.67969	3.77793	8.71198	1.62219	0.556751	0.771298	1.26833	1.22183	0.754828	1.44077	1.04281	4.37816	1.56011	5.3143	1.58907	1.44269	2.35039	1.167
4.92642	16.0469	2.18522	0.752555	1.67526	1.0793	0.782592	1.681	3.79701	8.70263	1.62673	0.557243	0.771852	1.26863	1.22771	0.756102	1.44273	1.04001	4.39036	1.56534	5.33086	1.58029	1.44308	2.3596	1.16826
4.93308	16.0512	2.18049	0.750571	1.67563	1.08077	0.7845	1.6823	3.81621	8.69324	1.63127	0.557716	0.772364	1.26893	1.23395	0.757328	1.44468	1.03721	4.40053	1.57063	5.34673	1.56983	1.44346	2.3689	1.16951
4.93975	16.0424	2.17564	0.748489	1.67591	1.08225	0.78652	1.6836	3.83551	8.68378	1.6358	0.558172	0.772833	1.26923	1.24052	0.758503	1.4466	1.03441	4.40879	1.57598	5.36182	1.55778	1.44385	2.37828	1.17077
4.94642	16.0211	2.17067	0.746329	1.67609	1.08374	0.788642	1.68488	3.8549	8.67422	1.64031	0.558613	0.773262	1.26952	1.24742	0.759624	1.44851	1.03161	4.41528	1.58138	5.37606	1.54426	1.44424	2.38772	1.17202
4.95308	15.9881	2.16559	0.744111	1.67618	1.08524	0.790856	1.68614	3.87438	8.66456	1.6448	0.559042	0.773652	1.26981	1.25462	0.760688	1.45038	1.02881	4.4202	1.58682	5.38937	1.52939	1.44466	2.39717	1.17325
4.95975	15.9439	2.16043	0.741852	1.67618	1.08673	0.793149	1.68737	3.89393	8.65477	1.64927	0.559462	0.774005	1.27011	1.2621	0.76169	1.45221	1.02601	4.42375	1.5923	5.40169	1.5133	1.4451	2.40663	1.17447
4.96642	15.8894	2.15519	0.739575	1.67609	1.08821	0.795509	1.68857	3.91356	8.64483	1.65371	0.559878	0.774324	1.27042	1.26983	0.762632	1.45401	1.02321	4.42614	1.59782	5.41295	1.49612	1.44559	2.41606	1.17567
4.97308	15.8253	2.14988	0.737299	1.67592	1.08967	0.79792	1.68972	3.93326	8.63474	1.65812	0.560292	0.774612	1.27073	1.27778	0.763511	1.45576	1.02041	4.42762	1.60335	5.42311	1.47801	1.44612	2.42543	1.17683
4.97975	15.7524	2.14453	0.735045	1.67566	1.09112	0.800365	1.69084	3.95305	8.6245	1.6625	0.560709	0.774872	1.27106	1.28592	0.764326	1.45746	1.01763	4.42845	1.60889	5.43211	1.45912	1.44671	2.43471	1.17797
4.98642	15.6715	2.13915	0.732833	1.67534	1.09254	0.802826	1.69192	3.97292	8.61408	1.66684	0.561131	0.77511	1.2714	1.29422	0.765077	1.45911	1.01484	4.42887	1.61444	5.43991	1.43962	1.44737	2.44386	1.17907
4.99308	15.5834	2.13374	0.730681	1.67495	1.09394	0.805284	1.69296	3.99288	8.60347	1.67115	0.561561	0.77533	1.27176	1.30264	0.765764	1.46071	1.01207	4.42918	1.61998	5.44648	1.41966	1.4481	2.45286	1.18013
4.99975	15.4891	2.12834	0.72861	1.67449	1.0953	0.80772	1.69397	4.01294	8.59269	1.67541	0.562003	0.775535	1.27213	1.31113	0.766389	1.46226	1.00931	4.42964	1.62552	5.45179	1.3994	1.44891	2.46167	1.18114
5.00642	15.3895	2.12296	0.726637	1.67399	1.09664	0.810114	1.69495	4.03311	8.5817	1.67963	0.562458	0.775733	1.27253	1.31967	0.766953	1.46376	1.00655	4.43052	1.63102	5.45581	1.37902	1.44982	2.47027	1.18211
5.01308	15.2854	2.11761	0.724778	1.67345	1.09795	0.812445	1.69591	4.05339	8.57051	1.68379	0.562928	0.775927	1.27295	1.3282	0.767459	1.46522	1.00381	4.4321	1.6365	5.45854	1.35868	1.45083	2.47864	1.18302
5.01975	15.1777	2.11231	0.72305	1.67288	1.09922	0.814693	1.69685	4.0738	8.55911	1.6879	0.563414	0.776123	1.27339	1.3367	0.767908	1.46662	1.00108	4.43463	1.64192	5.45996	1.33853	1.45195	2.48675	1.18388
5.02642	15.0674	2.10709	0.721465	1.67228	1.10046	0.816838	1.69778	4.09431	8.54748	1.69195	0.563916	0.776325	1.27385	1.34511	0.768304	1.46798	0.998369	4.43835	1.64729	5.46007	1.31871	1.45319	2.49459	1.18468
5.03308	14.9551	2.10195	0.720036	1.67168	1.10167	0.818862	1.69871	4.11495	8.53563	1.69594	0.564433	0.776539	1.27434	1.3534	0.768651	1.4693	0.995672	4.44346	1.6526	5.45889	1.29939	1.45455	2.50214	1.18543
5.03975	14.8418	2.09691	0.718775	1.67108	1.10284	0.820745	1.69965	4.13571	8.52352	1.69985	0.564964	0.776771	1.27486	1.36155	0.768952	1.47059	0.992991	4.45015	1.65783	5.45642	1.28068	1.45605	2.50941	1.18611
5.04642	14.7283	2.092	0.717688	1.6705	1.10398	0.822471	1.7006	4.15657	8.51116	1.7037	0.565509	0.777021	1.2754	1.3695	0.769212	1.47185	0.990328	4.45858	1.66297	5.4527	1.26271	1.45768	2.5164	1.18674
5.05308	14.6153	2.08722	0.716783	1.66995	1.10509	0.824025	1.70158	4.17753	8.49855	1.70746	0.566063	0.777296	1.27598	1.37724	0.769435	1.47308	0.987684	4.46884	1.66801	5.44774	1.24558	1.45946	2.52312	1.18731
5.05975	14.5036	2.08259	0.716063	1.66945	1.10616	0.825392	1.7026	4.19856	8.48565	1.71113	0.566627	0.777598	1.27658	1.38473	0.769626	1.4743	0.98506	4.48101	1.67295	5.44158	1.22938	1.46138	2.52958	1.18782
5.06642	14.3936	2.07812	0.715533	1.669	1.10721	0.826559	1.70366	4.21964	8.47247	1.71472	0.567194	0.77793	1.27721	1.39196	0.76979	1.47551	0.982458	4.4951	1.67776	5.43427	1.21419	1.46345	2.53579	1.18828
5.07308	14.2862	2.07383	0.715191	1.66863	1.10822	0.827517	1.70477	4.24075	8.459	1.7182	0.567762	0.778293	1.27787	1.39889	0.769932	1.47672	0.979876	4.51108	1.68245	5.42586	1.20006	1.46567	2.5418	1.18868
5.07975	14.1819	2.06972	0.715037	1.66834	1.1092	0.828258	1.70594	4.26184	8.44523	1.72159	0.568329	0.77869	1.27855	1.40553	0.770056	1.47793	0.977316	4.52891	1.687	5.41639	1.18703	1.46804	2.54761	1.18902
5.08642	14.0811	2.06581	0.715068	1.66816	1.11016	0.828776	1.70719	4.28288	8.43114	1.72486	0.56889	0.779119	1.27926	1.41184	0.770168	1.47916	0.974779	4.54846	1.6914	5.40594	1.17512	1.47055	2.55326	1.18932
5.09308	13.9843	2.0621	0.715276	1.66809	1.11108	0.829067	1.70852	4.30381	8.41674	1.72802	0.569442	0.779582	1.28	1.41784	0.770272	1.48041	0.972265	4.5696	1.69564	5.39456	1.16435	1.4732	2.55878	1.18958
5.09975	13.8921	2.05858	0.715657	1.66814	1.11197	0.82913	1.70993	4.32461	8.40201	1.73108	0.569983	0.780078	1.28076	1.4235	0.770374	1.48169	0.969773	4.59219	1.69972	5.38235	1.15469	1.47599	2.56422	1.18979
5.10642	13.8048	2.05528	0.716201	1.66833	1.11284	0.828966	1.71144	4.34519	8.38696	1.73401	0.570508	0.780604	1.28155	1.42883	0.770477	1.483	0.967305	4.61604	1.70363	5.36937	1.14613	1.4789	2.56959	1.18996
5.11308	13.7227	2.05219	0.716898	1.66866	1.11368	0.828579	1.71305	4.36552	8.37158	1.73682	0.571017	0.78116	1.28235	1.43383	0.770586	1.48435	0.964861	4.641	1.70737	5.35572	1.13862	1.48192	2.57493	1.1901
5.11975	13.6462	2.0493	0.717739	1.66914	1.11449	0.827974	1.71476	4.38554	8.35588	1.73951	0.571507	0.781742	1.28317	1.4385	0.770705	1.48575	0.962439	4.6669	1.71093	5.34148	1.13212	1.48506	2.58028	1.19021
5.12642	13.5756	2.04663	0.718708	1.66977	1.11528	0.82716	1.71659	4.40518	8.33985	1.74209	0.571978	0.782347	1.28401	1.44285	0.770837	1.4872	0.96004	4.6936	1.71431	5.32675	1.12657	1.48828	2.58568	1.19029
5.13308	13.5113	2.04415	0.719793	1.67056	1.11604	0.826146	1.71853	4.42439	8.3235	1.74455	0.572428	0.782973	1.28487	1.44689	0.770988	1.48871	0.957665	4.72096	1.7175	5.31164	1.12191	1.49158	2.59114	1.19035
5.13975	13.4534	2.04188	0.720981	1.67151	1.11677	0.824943	1.72059	4.44311	8.30684	1.74691	0.572858	0.783614	1.28573	1.45063	0.771157	1.49027	0.955312	4.74888	1.72051	5.29623	1.11806	1.49495	2.59672	1.1904
5.14642	13.4022	2.03979	0.722257	1.67261	1.11748	0.823566	1.72277	4.46128	8.2899	1.74915	0.573269	0.784267	1.28661	1.45407	0.771349	1.49191	0.952982	4.77729	1.72333	5.28064	1.11496	1.49836	2.60243	1.19044
5.15308	13.3579	2.03789	0.723605	1.67386	1.11816	0.822027	1.72507	4.47886	8.27265	1.7513	0.573663	0.784927	1.2875	1.45724	0.771565	1.49361	0.950673	4.80612	1.72597	5.26498	1.11252	1.50181	2.60831	1.19047
5.15975	13.3207	2.03616	0.725009	1.67526	1.11881	0.820345	1.72751	4.49579	8.25516	1.75335	0.574043	0.78559	1.28839	1.46013	0.771808	1.49538	0.948385	4.83533	1.72842	5.24934	1.11069	1.50527	2.61439	1.19051
5.16642	13.2908	2.0346	0.726456	1.67679	1.11943	0.818537	1.73006	4.51204	8.23741	1.75533	0.57441	0.786251	1.28928	1.46278	0.772078	1.49722	0.946119	4.86489	1.73068	5.23383	1.10938	1.50873	2.6207	1.19054
5.17308	13.2684	2.03319	0.72793	1.67845	1.12002	0.816618	1.73275	4.52755	8.21944	1.75723	0.574769	0.786906	1.29018	1.46519	0.772376	1.49914	0.943874	4.89479	1.73277	5.21855	1.10853	1.51218	2.62725	1.19059
5.17975	13.2536	2.03192	0.729418	1.68023	1.12058	0.814609	1.73556	4.54232	8.20128	1.75908	0.575122	0.787551	1.29107	1.46738	0.772703	1.50114	0.941649	4.925	1.73468	5.2036	1.10808	1.5156	2.63408	1.19064
5.18642	13.2465	2.03077	0.730902	1.68211	1.12111	0.812528	1.73849	4.55629	8.18295	1.76088	0.575477	0.788181	1.29197	1.46936	0.773058	1.50321	0.939443	4.9555	1.73642	5.18907	1.10796	1.51899	2.6412	1.19071
5.19308	13.2472	2.02973	0.732372	1.68407	1.1216	0.810392	1.74155	4.56947	8.16449	1.76265	0.575836	0.788793	1.29286	1.47115	0.773441	1.50537	0.937258	4.98627	1.73799	5.17506	1.10814	1.52232	2.64864	1.1908
5.19975	13.2558	2.0288	0.733816	1.68611	1.12205	0.808221	1.74472	4.58182	8.14592	1.7644	0.576204	0.789382	1.29374	1.47276	0.773851	1.5076	0.935092	5.01729	1.7394	5.16164	1.10856	1.52559	2.65641	1.19092
5.20642	13.2723	2.02794	0.73522	1.68821	1.12246	0.806032	1.74802	4.59334	8.1273	1.76614	0.576586	0.789948	1.29461	1.47421	0.774287	1.50992	0.932947	5.04851	1.74065	5.14889	1.10918	1.52878	2.66453	1.19105
5.21308	13.2967	2.02716	0.736576	1.69035	1.12284	0.803843	1.75143	4.60404	8.10865	1.76789	0.576987	0.790486	1.29548	1.47551	0.774748	1.51231	0.930821	5.07988	1.74175	5.13689	1.10996	1.5319	2.67301	1.19122
5.21975	13.3289	2.02643	0.737871	1.69251	1.12316	0.801668	1.75494	4.6139	8.09	1.76967	0.577412	0.790996	1.29634	1.47668	0.775232	1.51479	0.928717	5.11136	1.74271	5.12569	1.11088	1.53493	2.68186	1.19142
5.22642	13.369	2.02574	0.739102	1.69467	1.12345	0.799525	1.75856	4.62295	8.07141	1.77148	0.577863	0.791475	1.29719	1.47773	0.775737	1.51735	0.926634	5.14289	1.74354	5.11536	1.11191	1.53786	2.69108	1.19164
5.23308	13.4168	2.02508	0.740259	1.69682	1.12368	0.797426	1.76227	4.63118	8.0529	1.77334	0.578346	0.791924	1.29803	1.47867	0.776262	1.52	0.924574	5.17439	1.74423	5.10594	1.11302	1.54071	2.70067	1.1919
5.23975	13.4721	2.02444	0.74134	1.69895	1.12387	0.795385	1.76608	4.63863	8.03453	1.77526	0.578862	0.792342	1.29886	1.47952	0.776804	1.52274	0.922538	5.20581	1.74482	5.09749	1.11419	1.54346	2.71062	1.1922
5.24642	13.5347	2.02379	0.742338	1.70103	1.12402	0.793411	1.76997	4.64532	8.01633	1.77726	0.579413	0.792731	1.29968	1.48028	0.777364	1.52555	0.920529	5.23708	1.74529	5.09003	1.11543	1.54611	2.72094	1.19252
5.25308	13.6044	2.02313	0.74325	1.70305	1.12411	0.791514	1.77393	4.65126	7.99834	1.77935	0.580002	0.79309	1.30049	1.48099	0.777937	1.52846	0.918548	5.26813	1.74566	5.08361	1.1167	1.54866	2.73161	1.19288
5.25975	13.6809	2.02245	0.744078	1.70499	1.12417	0.789704	1.77796	4.65649	7.98059	1.78153	0.580629	0.793423	1.30129	1.48163	0.778523	1.53145	0.916597	5.29892	1.74595	5.07824	1.11801	1.55111	2.74262	1.19327
5.26642	13.7638	2.02174	0.744821	1.70685	1.12418	0.787986	1.78204	4.66104	7.96314	1.78382	0.581292	0.793732	1.30208	1.48224	0.779122	1.53453	0.914683	5.3294	1.74615	5.07394	1.11935	1.55347	2.75394	1.1937
5.27308	13.8526	2.02099	0.74548	1.70861	1.12415	0.786365	1.78618	4.66495	7.946	1.78623	0.581991	0.794019	1.30287	1.48282	0.779731	1.53769	0.912805	5.35951	1.74628	5.07075	1.12071	1.55572	2.76556	1.19416
5.27975	13.9468	2.02019	0.74606	1.71025	1.12408	0.784844	1.79034	4.66825	7.92921	1.78877	0.582723	0.794289	1.30364	1.48338	0.78035	1.54094	0.91097	5.38923	1.74636	5.06866	1.12209	1.55788	2.77746	1.19464
5.28642	14.046	2.01933	0.74656	1.71178	1.12397	0.783426	1.79454	4.67098	7.91283	1.79144	0.583484	0.794545	1.30441	1.48394	0.78098	1.54427	0.909183	5.41853	1.74638	5.06769	1.12349	1.55995	2.78961	1.19516
5.29308	14.1495	2.01842	0.746989	1.71318	1.12384	0.782111	1.79875	4.67319	7.89686	1.79425	0.584271	0.794791	1.30518	1.48451	0.78162	1.54768	0.907448	5.44741	1.74637	5.06784	1.1249	1.56192	2.80199	1.19571
5.29975	14.2565	2.01743	0.747353	1.71446	1.12368	0.780899	1.80297	4.6749	7.88134	1.79721	0.585078	0.795034	1.30594	1.48511	0.78227	1.55118	0.905773	5.47586	1.74634	5.06912	1.12633	1.5638	2.81458	1.19628
5.30642	14.3665	2.01638	0.747655	1.7156	1.12349	0.779788	1.80718	4.67617	7.8663	1.80033	0.585899	0.795277	1.3067	1.48574	0.782932	1.55475	0.904163	5.50387	1.74629	5.07153	1.12777	1.5656	2.82734	1.19688
5.31309	14.4787	2.01526	0.747906	1.71661	1.12329	0.778777	1.81138	4.67705	7.85175	1.8036	0.586729	0.795526	1.30746	1.48643	0.783606	1.5584	0.902627	5.53148	1.74623	5.07507	1.12923	1.5673	2.84027	1.1975
5.31975	14.5922	2.01406	0.74811	1.71749	1.12308	0.777861	1.81555	4.67756	7.83772	1.80704	0.587559	0.795786	1.30822	1.48718	0.784293	1.56211	0.901171	5.5587	1.74619	5.07974	1.1307	1.56893	2.85332	1.19814
5.32642	14.7062	2.0128	0.748277	1.71824	1.12286	0.777038	1.81969	4.67775	7.82422	1.81064	0.588382	0.796063	1.30898	1.48802	0.784995	1.56589	0.899806	5.58557	1.74616	5.08554	1.13218	1.57047	2.8665	1.1988
5.33309	14.8199	2.01146	0.748417	1.71886	1.12263	0.776303	1.82378	4.67766	7.81125	1.81442	0.589192	0.796361	1.30975	1.48895	0.785714	1.56973	0.898539	5.61211	1.74617	5.09247	1.13367	1.57194	2.87977	1.19948
5.33975	14.9325	2.01005	0.748536	1.71938	1.12242	0.775651	1.82783	4.67734	7.79883	1.81838	0.589981	0.796686	1.31052	1.48998	0.786451	1.57363	0.89738	5.63838	1.74621	5.10053	1.13518	1.57334	2.89313	1.20017
5.34642	15.0432	2.00859	0.748642	1.71978	1.12221	0.775079	1.83181	4.67681	7.78696	1.82252	0.59074	0.797043	1.31129	1.49114	0.787208	1.57758	0.89634	5.66439	1.74632	5.1097	1.13669	1.57468	2.90655	1.20088
5.35309	15.1511	2.00706	0.748744	1.72008	1.12201	0.774579	1.83572	4.6761	7.77564	1.82683	0.591463	0.797435	1.31208	1.49244	0.787988	1.58157	0.895428	5.69021	1.74648	5.12	1.13821	1.57597	2.92003	1.2016
5.35975	15.2556	2.00548	0.748852	1.7203	1.12183	0.774149	1.83956	4.67526	7.76486	1.83134	0.592143	0.797868	1.31287	1.49388	0.788792	1.58561	0.894656	5.71586	1.74672	5.13142	1.13974	1.5772	2.93355	1.20234
5.36642	15.3559	2.00385	0.748971	1.72043	1.12168	0.773783	1.84331	4.67431	7.7546	1.83603	0.592773	0.798346	1.31367	1.49548	0.789623	1.58967	0.894034	5.74138	1.74705	5.14396	1.14126	1.57839	2.94711	1.20308
5.37309	15.4514	2.00218	0.749109	1.7205	1.12155	0.773476	1.84697	4.67326	7.74485	1.84091	0.593349	0.798871	1.31448	1.49725	0.790481	1.59377	0.893572	5.7668	1.74748	5.15761	1.14279	1.57956	2.96068	1.20383
5.37975	15.5416	2.00049	0.749274	1.72051	1.12146	0.773223	1.85053	4.67215	7.73559	1.84598	0.593865	0.799446	1.31531	1.49919	0.791367	1.59788	0.893283	5.79217	1.74801	5.17238	1.14432	1.58069	2.97426	1.20459
5.38642	15.6261	1.99877	0.749471	1.72047	1.12139	0.773022	1.85399	4.67099	7.72678	1.85125	0.594317	0.800073	1.31615	1.50132	0.792285	1.602	0.893175	5.8175	1.74866	5.18825	1.14584	1.58182	2.98784	1.20536
5.39309	15.7044	1.99704	0.749707	1.7204	1.12137	0.772866	1.85733	4.66979	7.7184	1.85672	0.594702	0.800754	1.317	1.50365	0.793233	1.60614	0.893261	5.8428	1.74943	5.20524	1.14735	1.58294	3.00141	1.20612
5.39975	15.7764	1.9953	0.749984	1.72031	1.1214	0.772753	1.86055	4.66855	7.71041	1.86238	0.595019	0.80149	1.31786	1.50616	0.794214	1.61027	0.893547	5.86811	1.75034	5.22335	1.14886	1.58406	3.01495	1.20689
5.40642	15.8419	1.99358	0.750311	1.7202	1.12146	0.772679	1.86364	4.6673	7.70277	1.86825	0.595267	0.802281	1.31874	1.50888	0.795226	1.6144	0.894045	5.89343	1.75139	5.24255	1.15035	1.5852	3.02847	1.20766
5.41309	15.9008	1.99187	0.750686	1.72009	1.12158	0.772642	1.8666	4.66602	7.69544	1.87432	0.595446	0.803127	1.31963	1.51179	0.796271	1.61852	0.894763	5.91875	1.75259	5.26286	1.15184	1.58636	3.04194	1.20843
5.41975	15.9531	1.9902	0.751117	1.71998	1.12175	0.772638	1.86942	4.66472	7.68835	1.8806	0.595558	0.804026	1.32054	1.51491	0.797346	1.62261	0.895709	5.9441	1.75394	5.28427	1.15331	1.58755	3.05536	1.2092
5.42642	15.999	1.98857	0.751604	1.71988	1.12197	0.772665	1.87208	4.66339	7.68148	1.88708	0.595605	0.804977	1.32147	1.51821	0.798452	1.62669	0.896889	5.96944	1.75546	5.30678	1.15477	1.58877	3.06872	1.20996
5.43309	16.0387	1.987	0.752146	1.7198	1.12225	0.77272	1.8746	4.66203	7.67476	1.89378	0.595592	0.805977	1.32241	1.52171	0.799586	1.63073	0.89831	5.9948	1.75715	5.33038	1.15622	1.59003	3.08202	1.21072
5.43975	16.0723	1.98548	0.75275	1.71975	1.12259	0.772802	1.87695	4.66062	7.66814	1.90068	0.595523	0.807025	1.32337	1.5254	0.800745	1.63474	0.899976	6.02015	1.75902	5.35506	1.15765	1.59135	3.09526	1.21148
5.44642	16.1003	1.98406	0.753411	1.71973	1.12299	0.77291	1.87914	4.65917	7.66156	1.9078	0.595404	0.808116	1.32434	1.52926	0.801929	1.6387	0.901891	6.04548	1.76107	5.38083	1.15907	1.59271	3.10844	1.21223
5.45309	16.123	1.98272	0.75413	1.71975	1.12345	0.773041	1.88115	4.65765	7.65497	1.91513	0.595243	0.809249	1.32533	1.53328	0.803133	1.64261	0.904057	6.07077	1.7633	5.40767	1.16049	1.59412	3.12156	1.21297
5.45975	16.1408	1.98148	0.754907	1.71981	1.12397	0.773195	1.883	4.65606	7.64832	1.92268	0.595047	0.810417	1.32634	1.53746	0.804354	1.64647	0.906476	6.09603	1.76572	5.43557	1.16189	1.59559	3.13462	1.2137
5.46642	16.154	1.98035	0.755739	1.71992	1.12456	0.77337	1.88467	4.65438	7.64155	1.93044	0.594824	0.811618	1.32736	1.54178	0.80559	1.65028	0.909147	6.12121	1.76834	5.46453	1.16328	1.59711	3.14765	1.21443
5.47309	16.1632	1.97936	0.756623	1.72009	1.12521	0.773566	1.88616	4.65262	7.63461	1.93842	0.594586	0.812848	1.32839	1.54622	0.806836	1.65401	0.912069	6.14632	1.77115	5.49453	1.16467	1.59868	3.16066	1.21515
5.47975	16.1688	1.9785	0.757559	1.72031	1.12593	0.77378	1.88748	4.65076	7.62745	1.94661	0.594339	0.814102	1.32944	1.55077	0.808088	1.65768	0.915241	6.17133	1.77416	5.52557	1.16606	1.60031	3.17365	1.21586
5.48642	16.1712	1.97779	0.758542	1.72058	1.1267	0.774015	1.88862	4.6488	7.62003	1.95502	0.594096	0.815376	1.33051	1.55541	0.809342	1.66127	0.918655	6.19622	1.77738	5.55762	1.16744	1.60198	3.18666	1.21656
5.49309	16.1708	1.97723	0.75957	1.72092	1.12755	0.774267	1.88959	4.64673	7.61231	1.96364	0.593868	0.816666	1.33159	1.56013	0.810595	1.66479	0.922309	6.22099	1.7808	5.59067	1.16883	1.6037	3.1997	1.21726
5.49975	16.168	1.97685	0.760636	1.72132	1.12845	0.774536	1.89039	4.64455	7.60425	1.97247	0.593662	0.817967	1.33269	1.5649	0.811841	1.66822	0.926196	6.24562	1.78443	5.62471	1.17022	1.60546	3.2128	1.21795
5.50642	16.1634	1.97664	0.761742	1.72179	1.12941	0.774821	1.89102	4.64227	7.59582	1.98151	0.593492	0.819278	1.33379	1.56971	0.813078	1.67157	0.930306	6.27009	1.78826	5.65971	1.17162	1.60726	3.22599	1.21864
5.51309	16.1571	1.97663	0.762878	1.72232	1.13044	0.775123	1.8915	4.63989	7.587	1.99075	0.593365	0.820593	1.33491	1.57454	0.814301	1.67483	0.934631	6.29438	1.7923	5.69565	1.17303	1.60909	3.23928	1.21933
5.51975	16.1496	1.9768	0.764045	1.72293	1.13152	0.77544	1.89182	4.63743	7.57777	2.00019	0.593294	0.82191	1.33605	1.57937	0.815507	1.678	0.939158	6.3185	1.79655	5.7325	1.17445	1.61095	3.2527	1.22002
5.52642	16.1412	1.97719	0.765236	1.7236	1.13265	0.77577	1.89199	4.63489	7.56811	2.00982	0.593285	0.823226	1.33719	1.58417	0.816692	1.68107	0.943879	6.3424	1.801	5.77024	1.17589	1.61284	3.26629	1.2207
5.53309	16.1322	1.97778	0.766449	1.72435	1.13384	0.776114	1.89203	4.63229	7.55802	2.01965	0.593348	0.824541	1.33834	1.58894	0.817855	1.68404	0.948778	6.36609	1.80566	5.80883	1.17735	1.61474	3.28004	1.22139
5.53975	16.1228	1.9786	0.767676	1.72516	1.13508	0.776469	1.89193	4.62966	7.54749	2.02965	0.59349	0.82585	1.3395	1.59365	0.818992	1.68691	0.953842	6.38955	1.81052	5.84824	1.17883	1.61666	3.29401	1.22208
5.54642	16.1132	1.97964	0.768918	1.72605	1.13636	0.776836	1.89171	4.62701	7.53654	2.03983	0.593718	0.827155	1.34067	1.59829	0.820103	1.68968	0.959054	6.41276	1.81558	5.88842	1.18034	1.6186	3.30818	1.22278
5.55309	16.1036	1.9809	0.770169	1.72701	1.13768	0.777213	1.89139	4.62437	7.52517	2.05017	0.594036	0.828453	1.34185	1.60284	0.821185	1.69234	0.964398	6.43569	1.82084	5.92932	1.18188	1.62055	3.3226	1.22348
5.55975	16.0942	1.9824	0.771425	1.72804	1.13904	0.7776	1.89096	4.62177	7.51341	2.06066	0.594449	0.829747	1.34303	1.60729	0.822239	1.6949	0.969859	6.45834	1.82629	5.97091	1.18344	1.62251	3.33725	1.22419
5.56642	16.0851	1.98414	0.772684	1.72914	1.14043	0.777995	1.89044	4.61922	7.50126	2.0713	0.59496	0.831034	1.34422	1.61162	0.823263	1.69734	0.975415	6.48067	1.83192	6.01311	1.18504	1.62447	3.35216	1.22492
5.57309	16.0764	1.98612	0.773942	1.73031	1.14185	0.778397	1.88984	4.61678	7.48878	2.08208	0.595569	0.832317	1.34541	1.61583	0.824258	1.69968	0.981051	6.50267	1.83774	6.05587	1.18668	1.62644	3.36733	1.22565
5.57975	16.0681	1.98833	0.775198	1.73153	1.14329	0.778807	1.88918	4.61445	7.47598	2.09297	0.596277	0.833597	1.34661	1.61989	0.825225	1.70191	0.986744	6.52431	1.84373	6.09912	1.18836	1.62842	3.38277	1.2264
5.58642	16.0603	1.99079	0.776442	1.73283	1.14474	0.779224	1.88846	4.61227	7.4629	2.10396	0.597083	0.834875	1.3478	1.62381	0.826165	1.70402	0.992477	6.54556	1.84989	6.14278	1.19008	1.63039	3.39846	1.22717
5.59309	16.0529	1.99348	0.777677	1.73417	1.14621	0.779647	1.8877	4.61027	7.44959	2.11505	0.597984	0.836154	1.349	1.62757	0.827079	1.70602	0.998227	6.5664	1.8562	6.18677	1.19184	1.63238	3.41442	1.22795
5.59975	16.046	1.99641	0.778899	1.73557	1.14768	0.780076	1.88691	4.60847	7.43607	2.12622	0.598977	0.837436	1.3502	1.63117	0.82797	1.70791	1.00398	6.5868	1.86267	6.231	1.19365	1.63437	3.43064	1.22875
5.60642	16.0395	1.99957	0.780105	1.73702	1.14915	0.780512	1.88609	4.60689	7.42241	2.13745	0.600057	0.838724	1.35139	1.6346	0.828841	1.70969	1.0097	6.60672	1.86927	6.27538	1.19552	1.63636	3.44712	1.22956
5.61309	16.0333	2.00295	0.781292	1.73851	1.15061	0.780957	1.88527	4.60558	7.40864	2.14872	0.601217	0.84002	1.35259	1.63787	0.829693	1.71137	1.01539	6.62615	1.87601	6.3198	1.19743	1.63836	3.46384	1.2304
5.61975	16.0274	2.00656	0.782456	1.74002	1.15205	0.781412	1.88445	4.60453	7.3948	2.16002	0.602452	0.841328	1.35378	1.64097	0.830529	1.71293	1.02101	6.64504	1.88287	6.36415	1.1994	1.64037	3.48081	1.23125
5.62642	16.0216	2.01038	0.783595	1.74157	1.15347	0.781877	1.88364	4.60377	7.38096	2.17133	0.603754	0.84265	1.35497	1.6439	0.831352	1.71439	1.02655	6.66336	1.88983	6.40833	1.20143	1.64239	3.49802	1.23212
5.63309	16.0158	2.01439	0.784707	1.74313	1.15487	0.782357	1.88285	4.60331	7.36715	2.18264	0.605115	0.843991	1.35615	1.64666	0.832166	1.71576	1.03199	6.68108	1.89688	6.4522	1.20352	1.64442	3.51546	1.23301
5.63975	16.01	2.01861	0.785787	1.74469	1.15623	0.782855	1.8821	4.60317	7.35342	2.19391	0.606526	0.845352	1.35733	1.64926	0.832972	1.71703	1.03731	6.69819	1.90401	6.49565	1.20566	1.64647	3.53315	1.23392
5.64642	16.004	2.023	0.786838	1.74625	1.15755	0.783374	1.88138	4.60336	7.33981	2.20514	0.60798	0.846736	1.3585	1.65171	0.833774	1.71821	1.0425	6.71463	1.91121	6.53853	1.20787	1.64853	3.55106	1.23485
5.65309	15.9976	2.02756	0.787855	1.7478	1.15882	0.78392	1.88071	4.60388	7.32637	2.2163	0.609467	0.848147	1.35967	1.654	0.834575	1.71932	1.04755	6.7304	1.91845	6.58072	1.21015	1.65061	3.56921	1.2358
5.65975	15.9907	2.03228	0.788836	1.74932	1.16003	0.784498	1.88009	4.60473	7.31314	2.22737	0.610979	0.849586	1.36083	1.65615	0.835376	1.72035	1.05243	6.74546	1.92572	6.62207	1.21249	1.65271	3.58759	1.23676
5.66642	15.9832	2.03714	0.78978	1.7508	1.16119	0.785115	1.87952	4.60592	7.30015	2.23834	0.612508	0.851056	1.36198	1.65817	0.83618	1.72132	1.05713	6.7598	1.93301	6.66246	1.21489	1.65482	3.60622	1.23774
5.67309	15.975	2.04212	0.790687	1.75224	1.16228	0.78578	1.87902	4.60745	7.28744	2.24918	0.614044	0.852558	1.36313	1.66006	0.836988	1.72223	1.06166	6.77338	1.94029	6.70172	1.21737	1.65697	3.62509	1.23873
5.67975	15.966	2.04721	0.791555	1.75361	1.1633	0.786498	1.87857	4.6093	7.27505	2.25988	0.615579	0.854097	1.36427	1.66184	0.837803	1.72311	1.06598	6.78621	1.94755	6.73973	1.21991	1.65913	3.64423	1.23973
5.68642	15.956	2.05239	0.792384	1.75491	1.16425	0.787281	1.87819	4.61148	7.26299	2.27042	0.617107	0.85567	1.36541	1.66352	0.838624	1.72395	1.07011	6.79826	1.95477	6.77634	1.22252	1.66133	3.66362	1.24074
5.69309	15.9449	2.05764	0.793174	1.75613	1.16512	0.788139	1.87787	4.61397	7.25129	2.28078	0.618619	0.857281	1.36653	1.66511	0.839453	1.72478	1.07404	6.80952	1.96192	6.8114	1.2252	1.66354	3.6833	1.24176
5.69975	15.9327	2.06294	0.793926	1.75725	1.1659	0.789081	1.87761	4.61675	7.23999	2.29094	0.620108	0.858928	1.36765	1.66662	0.840291	1.7256	1.07776	6.81999	1.96898	6.84481	1.22796	1.66578	3.70327	1.24279
5.70642	15.9192	2.06828	0.794642	1.75826	1.16661	0.79012	1.87742	4.61981	7.22908	2.30089	0.621568	0.860614	1.36877	1.66807	0.841136	1.72643	1.08126	6.82966	1.97594	6.87641	1.23078	1.66805	3.72355	1.24382
5.71309	15.9045	2.07364	0.795323	1.75916	1.16723	0.791268	1.87728	4.62314	7.21857	2.31061	0.622994	0.862336	1.36988	1.66947	0.84199	1.72728	1.08456	6.83854	1.98278	6.90609	1.23368	1.67034	3.74416	1.24485
5.71975	15.8884	2.07899	0.795971	1.75994	1.16777	0.792537	1.87719	4.62671	7.2085	2.32009	0.62438	0.864095	1.37098	1.67084	0.84285	1.72818	1.08765	6.84662	1.98946	6.93375	1.23666	1.67266	3.76511	1.24588
5.72642	15.871	2.08432	0.796587	1.76058	1.16823	0.793942	1.87715	4.6305	7.19884	2.32932	0.625722	0.865889	1.37208	1.67219	0.843717	1.72912	1.09053	6.85392	1.99597	6.95928	1.23971	1.67501	3.78641	1.2469
5.73309	15.8523	2.08961	0.797173	1.76109	1.16861	0.795494	1.87716	4.6345	7.1896	2.33829	0.627016	0.867717	1.37318	1.67354	0.844588	1.73014	1.09321	6.86045	2.00228	6.9826	1.24284	1.67737	3.8081	1.24792
5.73975	15.8322	2.09484	0.797735	1.76145	1.1689	0.797209	1.8772	4.63865	7.18078	2.34699	0.628258	0.869577	1.37427	1.67491	0.845465	1.73123	1.09569	6.86622	2.00838	7.00364	1.24606	1.67976	3.83018	1.24893
5.74642	15.8107	2.09999	0.798275	1.76167	1.16912	0.799099	1.87728	4.64296	7.17237	2.3554	0.629446	0.871466	1.37536	1.6763	0.846343	1.73243	1.09797	6.87124	2.01424	7.02234	1.24935	1.68217	3.85267	1.24994
5.75309	15.7879	2.10505	0.798796	1.76174	1.16926	0.801178	1.87738	4.64738	7.16435	2.36353	0.630576	0.873382	1.37645	1.67774	0.847221	1.73374	1.10008	6.87554	2.01983	7.03865	1.25274	1.68459	3.87558	1.25093
5.75975	15.7639	2.11	0.799302	1.76166	1.16934	0.803458	1.87751	4.65189	7.15672	2.37137	0.631649	0.875321	1.37754	1.67923	0.8481	1.73518	1.10201	6.87914	2.02515	7.05257	1.25622	1.68704	3.89894	1.25191
5.76642	15.7385	2.11483	0.799797	1.76144	1.16936	0.805952	1.87764	4.65646	7.14945	2.37892	0.632662	0.877281	1.37863	1.6808	0.848976	1.73675	1.10377	6.88206	2.03015	7.06409	1.25979	1.6895	3.92275	1.25289
5.77309	15.712	2.11952	0.800287	1.76107	1.16932	0.80867	1.87779	4.66106	7.14252	2.38617	0.633615	0.879257	1.37972	1.68246	0.849849	1.73849	1.10537	6.88434	2.03483	7.07322	1.26346	1.69197	3.94704	1.25385
5.77975	15.6843	2.12405	0.800775	1.76055	1.16923	0.811624	1.87794	4.66567	7.13593	2.39314	0.634509	0.881245	1.38081	1.68422	0.850716	1.74038	1.10682	6.88599	2.03916	7.07999	1.26724	1.69446	3.97181	1.25481
5.78642	15.6555	2.12842	0.801263	1.7599	1.1691	0.81482	1.87808	4.67026	7.12962	2.39981	0.635342	0.883241	1.38191	1.6861	0.851577	1.74245	1.10814	6.88706	2.04313	7.08447	1.27113	1.69695	3.99707	1.25575
5.79309	15.6256	2.13262	0.801756	1.75912	1.16893	0.818268	1.87821	4.67481	7.12359	2.40619	0.636117	0.885241	1.383	1.6881	0.85243	1.7447	1.10933	6.88757	2.04672	7.08672	1.27514	1.69946	4.02284	1.25669
5.79975	15.5947	2.13664	0.802258	1.75821	1.16873	0.82197	1.87833	4.67931	7.11782	2.4123	0.636834	0.887239	1.3841	1.69024	0.853274	1.74715	1.11041	6.88756	2.0499	7.08684	1.27927	1.70197	4.04911	1.25763
5.80642	15.5627	2.14047	0.80277	1.75719	1.16851	0.825929	1.87844	4.68373	7.11226	2.41812	0.637494	0.889231	1.3852	1.69252	0.85411	1.74979	1.11138	6.88707	2.05267	7.08492	1.28353	1.70448	4.07591	1.25857
5.81309	15.5298	2.1441	0.803298	1.75606	1.16827	0.830148	1.87852	4.68807	7.1069	2.42369	0.6381	0.891213	1.38631	1.69496	0.854936	1.75264	1.11225	6.88613	2.05502	7.08109	1.28794	1.707	4.10323	1.25951
5.81975	15.4959	2.14753	0.803847	1.75483	1.16803	0.834624	1.87858	4.6923	7.1017	2.42899	0.638653	0.893178	1.38742	1.69756	0.855752	1.75569	1.11305	6.88477	2.05692	7.07548	1.29249	1.70951	4.13108	1.26045
5.82642	15.461	2.15075	0.80441	1.75352	1.16778	0.839351	1.87861	4.69643	7.09665	2.43404	0.639155	0.895123	1.38853	1.70033	0.856558	1.75895	1.11377	6.88304	2.05837	7.06824	1.2972	1.71202	4.15945	1.2614
5.83309	15.4252	2.15378	0.804995	1.75213	1.16754	0.844322	1.87861	4.70045	7.09172	2.43886	0.639609	0.897042	1.38965	1.70328	0.857354	1.76242	1.11444	6.88098	2.05937	7.05952	1.30206	1.71453	4.18835	1.26236
5.83975	15.3884	2.15659	0.805599	1.75067	1.16731	0.849527	1.87858	4.70435	7.08688	2.44345	0.640017	0.898931	1.39078	1.70639	0.858141	1.7661	1.11505	6.87862	2.05991	7.04948	1.3071	1.71703	4.21777	1.26333
5.84642	15.3506	2.1592	0.806226	1.74916	1.16709	0.854952	1.87852	4.70815	7.08212	2.44783	0.640383	0.900784	1.3919	1.70968	0.858917	1.76998	1.11564	6.87601	2.05997	7.03827	1.3123	1.71952	4.2477	1.26432
5.85309	15.3118	2.16161	0.806871	1.7476	1.1669	0.860581	1.87844	4.71185	7.07739	2.45201	0.640708	0.902598	1.39303	1.71314	0.859688	1.77405	1.11619	6.87319	2.05957	7.02607	1.31769	1.722	4.27813	1.26532
5.85975	15.272	2.16381	0.807537	1.74601	1.16673	0.866392	1.87833	4.71545	7.07268	2.456	0.640994	0.904368	1.39416	1.71677	0.860449	1.77833	1.11673	6.87021	2.05871	7.01304	1.32326	1.72447	4.30906	1.26634
5.86642	15.2312	2.16582	0.808221	1.74439	1.16658	0.872365	1.87819	4.71896	7.06798	2.45982	0.641247	0.90609	1.39529	1.72057	0.861207	1.78279	1.11726	6.86709	2.05738	6.99934	1.32902	1.72692	4.34046	1.26739
5.87309	15.1892	2.16764	0.808918	1.74275	1.16647	0.878473	1.87803	4.72239	7.06326	2.46348	0.641466	0.907762	1.39642	1.72453	0.861959	1.78742	1.1178	6.86389	2.05558	6.98514	1.33497	1.72936	4.37232	1.26845
5.87975	15.146	2.16928	0.809629	1.7411	1.16639	0.884689	1.87784	4.72576	7.05849	2.467	0.641656	0.909379	1.39756	1.72864	0.862708	1.79223	1.11835	6.86064	2.05334	6.97058	1.34112	1.73178	4.40463	1.26953
5.88642	15.1017	2.17073	0.81035	1.73946	1.16634	0.89098	1.87764	4.72907	7.05368	2.47039	0.641819	0.910939	1.39869	1.7329	0.863455	1.79719	1.11892	6.8574	2.05065	6.95581	1.34746	1.73418	4.43736	1.27064
5.89309	15.0563	2.17202	0.811074	1.73782	1.16633	0.897315	1.87743	4.73234	7.04879	2.47366	0.641958	0.912439	1.39981	1.73729	0.864203	1.80231	1.11953	6.85421	2.04754	6.94097	1.35398	1.73656	4.47049	1.27176
5.89975	15.0095	2.17314	0.811801	1.7362	1.16636	0.903659	1.87722	4.73558	7.04381	2.47683	0.642075	0.913879	1.40094	1.74181	0.864952	1.80756	1.12017	6.8511	2.044	6.92619	1.3607	1.73892	4.50401	1.2729
5.90642	14.9615	2.17411	0.812522	1.7346	1.16643	0.909976	1.877	4.7388	7.03872	2.47991	0.642174	0.915255	1.40205	1.74643	0.865704	1.81293	1.12086	6.84812	2.04007	6.91159	1.3676	1.74126	4.53789	1.27407
5.91309	14.9123	2.17493	0.813236	1.73303	1.16653	0.916227	1.87678	4.74201	7.03352	2.48293	0.642255	0.916567	1.40316	1.75116	0.866462	1.81841	1.12162	6.84532	2.03575	6.89726	1.37468	1.74358	4.57212	1.27524
5.91976	14.8617	2.17562	0.813937	1.73149	1.16667	0.922376	1.87658	4.74523	7.02819	2.48587	0.642322	0.917815	1.40426	1.75597	0.867225	1.82399	1.12243	6.84274	2.03107	6.88331	1.38193	1.74588	4.60668	1.27643
5.92642	14.8098	2.17619	0.814621	1.72999	1.16684	0.928383	1.87638	4.74846	7.02272	2.48878	0.642376	0.918998	1.40535	1.76085	0.867998	1.82965	1.12331	6.84042	2.02604	6.86982	1.38935	1.74817	4.64155	1.27764
5.93309	14.7567	2.17664	0.815281	1.72854	1.16705	0.934211	1.87621	4.7517	7.01709	2.49164	0.64242	0.920116	1.40643	1.76578	0.868781	1.83538	1.12427	6.8384	2.0207	6.85685	1.3969	1.75043	4.67673	1.27885
5.93976	14.7023	2.17699	0.815912	1.72713	1.16729	0.939821	1.87606	4.75497	7.0113	2.49448	0.642455	0.921171	1.40749	1.77076	0.869574	1.84116	1.12531	6.83672	2.01506	6.84447	1.4046	1.75267	4.71219	1.28008
5.94642	14.6467	2.17726	0.81651	1.72578	1.16756	0.945176	1.87595	4.75826	7.00533	2.49731	0.642485	0.922163	1.40854	1.77576	0.870381	1.84699	1.12645	6.83542	2.00916	6.83272	1.41241	1.75489	4.74793	1.2813
5.95309	14.5899	2.17744	0.817072	1.72448	1.16786	0.950241	1.87587	4.76159	6.99918	2.50013	0.642509	0.923093	1.40957	1.78076	0.871201	1.85284	1.12767	6.83454	2.00302	6.82164	1.42033	1.75709	4.78395	1.28253
5.95976	14.532	2.17755	0.81759	1.72325	1.16819	0.954984	1.87583	4.76495	6.99283	2.50296	0.64253	0.923965	1.41058	1.78576	0.872035	1.8587	1.129	6.83411	1.99667	6.81126	1.42833	1.75927	4.82024	1.28377
5.96642	14.4729	2.1776	0.818067	1.72208	1.16854	0.959371	1.87584	4.76834	6.98628	2.5058	0.64255	0.924778	1.41157	1.79074	0.872885	1.86456	1.13043	6.83417	1.99014	6.80158	1.4364	1.76144	4.85678	1.285
5.97309	14.4129	2.17761	0.818488	1.72098	1.16892	0.963375	1.87591	4.77177	6.97953	2.50866	0.642569	0.925536	1.41254	1.79568	0.873749	1.8704	1.13197	6.83475	1.98346	6.79263	1.44451	1.76358	4.89358	1.28623
5.97976	14.3519	2.17759	0.818857	1.71995	1.16931	0.966969	1.87602	4.77523	6.97256	2.51156	0.642588	0.926241	1.41348	1.80057	0.87463	1.87621	1.13362	6.83587	1.97666	6.7844	1.45265	1.7657	4.93063	1.28744
5.98642	14.2901	2.17754	0.819167	1.719	1.16972	0.97013	1.8762	4.77872	6.96537	2.51449	0.642611	0.926895	1.4144	1.80539	0.875526	1.88198	1.13539	6.83758	1.96977	6.77686	1.46078	1.76781	4.96793	1.28866
5.99309	14.2275	2.17748	0.819418	1.71812	1.17015	0.97284	1.87643	4.78224	6.95796	2.51746	0.642636	0.927503	1.4153	1.81013	0.876437	1.8877	1.13728	6.83989	1.96284	6.77003	1.46889	1.7699	5.00546	1.28986
5.99976	14.1643	2.17741	0.819603	1.71733	1.17059	0.975082	1.87673	4.78577	6.9503	2.52048	0.642665	0.928066	1.41616	1.81477	0.877362	1.89335	1.13929	6.84282	1.95588	6.76387	1.47695	1.77196	5.04324	1.29105
6.00642	14.1004	2.17735	0.819723	1.71662	1.17104	0.976845	1.8771	4.78932	6.94243	2.52355	0.642699	0.928588	1.417	1.8193	0.8783	1.89891	1.14143	6.84639	1.94893	6.75836	1.48493	1.77401	5.08124	1.29222
6.01309	14.0362	2.17731	0.819772	1.71601	1.1715	0.97812	1.87753	4.79288	6.93431	2.52669	0.642739	0.929072	1.41781	1.82372	0.87925	1.9044	1.14369	6.85063	1.94202	6.75346	1.49281	1.77604	5.11946	1.29338
6.01976	13.9716	2.17729	0.819752	1.71548	1.17196	0.978904	1.87803	4.79644	6.92595	2.52988	0.642785	0.929521	1.4186	1.828	0.88021	1.90978	1.14609	6.85555	1.93519	6.74914	1.50056	1.77805	5.15789	1.29452
6.02642	13.9067	2.1773	0.81966	1.71506	1.17243	0.979195	1.8786	4.8	6.91735	2.53315	0.642838	0.929939	1.41935	1.83215	0.881178	1.91505	1.14863	6.86114	1.92846	6.74537	1.50816	1.78005	5.1965	1.29564
6.03309	13.8418	2.17736	0.819491	1.71473	1.17291	0.978998	1.87924	4.80355	6.90852	2.53649	0.642899	0.930329	1.42007	1.83614	0.882153	1.9202	1.1513	6.86743	1.92186	6.74211	1.51557	1.78203	5.2353	1.29673
6.03976	13.7768	2.17746	0.81925	1.71451	1.17339	0.97832	1.87994	4.80707	6.89944	2.5399	0.642968	0.930694	1.42076	1.83998	0.883132	1.92523	1.1541	6.87441	1.91541	6.7393	1.52278	1.784	5.27426	1.29781
6.04642	13.712	2.17762	0.818929	1.71439	1.17387	0.977172	1.88071	4.81056	6.89013	2.5434	0.643045	0.931039	1.42141	1.84364	0.884113	1.93013	1.15705	6.8821	1.90915	6.73692	1.52975	1.78595	5.31335	1.29885
6.05309	13.6473	2.17783	0.81853	1.71438	1.17436	0.975569	1.88154	4.81401	6.88057	2.54698	0.643132	0.931365	1.42204	1.84714	0.885092	1.93488	1.16013	6.89048	1.9031	6.73491	1.53646	1.7879	5.35257	1.29988
6.05976	13.583	2.17811	0.818055	1.71448	1.17485	0.973528	1.88243	4.81742	6.8708	2.55066	0.643227	0.931678	1.42263	1.85046	0.886069	1.93949	1.16335	6.89954	1.89727	6.73323	1.54289	1.78984	5.39189	1.30087
6.06642	13.5191	2.17845	0.817496	1.7147	1.17534	0.97107	1.88338	4.82076	6.86079	2.55442	0.643332	0.931979	1.4232	1.85359	0.88704	1.94395	1.16672	6.90929	1.89169	6.73185	1.54901	1.79177	5.4313	1.30184
6.07309	13.4557	2.17886	0.81686	1.71503	1.17583	0.96822	1.88439	4.82403	6.85057	2.55829	0.643447	0.932273	1.42373	1.85654	0.888003	1.94826	1.17023	6.91971	1.88637	6.73071	1.55481	1.7937	5.47075	1.30278
6.07976	13.3929	2.17935	0.816144	1.71547	1.17632	0.965004	1.88546	4.82724	6.84013	2.56226	0.643572	0.932563	1.42423	1.85931	0.888956	1.95241	1.17388	6.93078	1.88132	6.72978	1.56026	1.79563	5.51025	1.3037
6.08642	13.3308	2.17991	0.815344	1.71603	1.17683	0.96145	1.88657	4.83034	6.82948	2.56633	0.643707	0.932851	1.4247	1.86188	0.889895	1.9564	1.17767	6.9425	1.87656	6.72901	1.56534	1.79757	5.54977	1.30459
6.09309	13.2695	2.18055	0.814468	1.7167	1.17733	0.957588	1.88773	4.83336	6.81864	2.57052	0.643852	0.933142	1.42514	1.86427	0.89082	1.96022	1.18161	6.95483	1.8721	6.72836	1.57003	1.79951	5.5893	1.30545
6.09976	13.2091	2.18125	0.813511	1.71749	1.17785	0.953451	1.88894	4.83628	6.80761	2.57482	0.644007	0.933438	1.42555	1.86647	0.891728	1.96389	1.18569	6.96777	1.86794	6.7278	1.57432	1.80146	5.62883	1.30628
6.10642	13.1497	2.18203	0.812474	1.71838	1.17837	0.949072	1.89019	4.83908	6.79639	2.57924	0.644171	0.933743	1.42594	1.86849	0.892616	1.96739	1.18991	6.98128	1.86407	6.72728	1.5782	1.80343	5.66836	1.30709
6.11309	13.0912	2.18289	0.811359	1.7194	1.1789	0.944484	1.89147	4.84176	6.78501	2.58379	0.644346	0.934059	1.4263	1.87032	0.893485	1.97073	1.19428	6.99534	1.86051	6.72678	1.58165	1.80541	5.70788	1.30788
6.11976	13.0338	2.18381	0.810163	1.72052	1.17944	0.939723	1.8928	4.84432	6.77346	2.58846	0.644531	0.93439	1.42663	1.87199	0.894332	1.9739	1.19878	7.00992	1.85725	6.72625	1.58466	1.80741	5.74741	1.30864
6.12642	12.9775	2.18479	0.80889	1.72174	1.18	0.934823	1.89415	4.84675	6.76175	2.59326	0.644724	0.934737	1.42695	1.87348	0.895155	1.97692	1.20343	7.02499	1.85428	6.72568	1.58723	1.80944	5.78695	1.30939
6.13309	12.9225	2.18584	0.807544	1.72307	1.18057	0.929819	1.89553	4.84905	6.74991	2.59819	0.644926	0.935105	1.42724	1.87481	0.895954	1.97978	1.20822	7.04053	1.8516	6.72503	1.58934	1.81149	5.82655	1.31012
6.13976	12.8686	2.18694	0.806122	1.7245	1.18116	0.924743	1.89693	4.85121	6.73793	2.60326	0.645137	0.935494	1.42751	1.87599	0.896729	1.98249	1.21315	7.0565	1.84919	6.72427	1.59099	1.81357	5.86623	1.31083
6.14642	12.816	2.1881	0.804625	1.72602	1.18177	0.91963	1.89836	4.85322	6.72584	2.60846	0.645356	0.935908	1.42776	1.87703	0.897479	1.98505	1.21822	7.07287	1.84704	6.72338	1.59219	1.81569	5.90603	1.31153
6.15309	12.7647	2.18929	0.803063	1.72763	1.1824	0.914513	1.89981	4.85509	6.71363	2.6138	0.645582	0.936348	1.428	1.87793	0.898202	1.98746	1.22342	7.0896	1.84515	6.72235	1.59292	1.81784	5.94601	1.31222
6.15976	12.7148	2.19053	0.801429	1.72932	1.18305	0.90942	1.90127	4.85681	6.70132	2.61928	0.645814	0.936818	1.42822	1.87871	0.8989	1.98974	1.22876	7.10666	1.84348	6.72114	1.59319	1.82004	5.98623	1.31291
6.16642	12.6662	2.1918	0.799731	1.7311	1.18372	0.904383	1.90274	4.85839	6.68893	2.62489	0.646052	0.937318	1.42843	1.87937	0.899572	1.99188	1.23423	7.12402	1.84204	6.71975	1.593	1.82228	6.02677	1.31358
6.17309	12.6189	2.19309	0.797971	1.73296	1.18442	0.899427	1.90422	4.85981	6.67645	2.63065	0.646297	0.93785	1.42863	1.87994	0.900218	1.9939	1.23984	7.14164	1.8408	6.71816	1.59237	1.82456	6.06772	1.31425
6.17976	12.5731	2.19441	0.79615	1.73489	1.18515	0.894578	1.90571	4.86108	6.66392	2.63653	0.646544	0.938416	1.42882	1.88041	0.900839	1.9958	1.24557	7.15949	1.83975	6.71635	1.59128	1.8269	6.10917	1.31492
6.18642	12.5286	2.19573	0.794277	1.7369	1.1859	0.88986	1.9072	4.86221	6.65133	2.64256	0.646796	0.939018	1.42901	1.88081	0.901434	1.99758	1.25144	7.17752	1.83887	6.71433	1.58976	1.82928	6.15121	1.31559
6.19309	12.4856	2.19705	0.792353	1.73896	1.18669	0.885294	1.9087	4.86318	6.63869	2.64871	0.64705	0.939657	1.42919	1.88115	0.902003	1.99927	1.25743	7.19571	1.83814	6.71208	1.58782	1.83172	6.19397	1.31626
6.19976	12.4439	2.19837	0.790384	1.7411	1.1875	0.880898	1.91019	4.864	6.62602	2.655	0.647304	0.940334	1.42937	1.88144	0.902549	2.00086	1.26354	7.21403	1.83755	6.7096	1.58545	1.83422	6.23755	1.31693
6.20642	12.4036	2.19968	0.788374	1.74329	1.18834	0.876689	1.91169	4.86469	6.61333	2.66141	0.647559	0.94105	1.42955	1.88169	0.903071	2.00236	1.26977	7.23243	1.83709	6.70689	1.58269	1.83677	6.28209	1.31761
6.21309	12.3647	2.20096	0.78633	1.74554	1.18921	0.872681	1.91318	4.86521	6.60064	2.66794	0.647814	0.941806	1.42974	1.88192	0.903568	2.00378	1.27612	7.25089	1.83673	6.70394	1.57954	1.83938	6.3277	1.31828
6.21976	12.3272	2.20222	0.784257	1.74785	1.19011	0.868887	1.91466	4.8656	6.58795	2.67458	0.648066	0.942603	1.42992	1.88215	0.904042	2.00514	1.28258	7.26937	1.83646	6.70076	1.57601	1.84204	6.37451	1.31896
6.22642	12.2909	2.20344	0.782161	1.75021	1.19104	0.865315	1.91614	4.86585	6.57528	2.68134	0.648316	0.94344	1.43012	1.88238	0.904493	2.00644	1.28915	7.28784	1.83627	6.69735	1.57213	1.84476	6.42267	1.31964
6.23309	12.256	2.20461	0.780047	1.75262	1.19201	0.861974	1.91761	4.86595	6.56263	2.68821	0.648561	0.944321	1.43032	1.88262	0.90492	2.00769	1.29583	7.30627	1.83615	6.69371	1.56791	1.84753	6.47228	1.32033
6.23976	12.2223	2.20573	0.777925	1.75508	1.193	0.858868	1.91907	4.86591	6.55002	2.69518	0.648801	0.945244	1.43054	1.88289	0.905325	2.00891	1.30262	7.32463	1.83609	6.68987	1.56337	1.85036	6.52348	1.32101
6.24642	12.1898	2.2068	0.7758	1.75759	1.19401	0.856002	1.92052	4.86573	6.53746	2.70225	0.649034	0.94621	1.43076	1.8832	0.905706	2.01009	1.3095	7.3429	1.83608	6.68581	1.55853	1.85323	6.57639	1.32169
6.25309	12.1584	2.2078	0.773679	1.76014	1.19506	0.853377	1.92196	4.86542	6.52495	2.7094	0.64926	0.947219	1.431	1.88357	0.906065	2.01126	1.31647	7.36103	1.8361	6.68155	1.5534	1.85614	6.63111	1.32237
6.25976	12.1282	2.20872	0.77157	1.76273	1.19613	0.850993	1.9234	4.86497	6.51251	2.71665	0.649477	0.948272	1.43126	1.88399	0.906401	2.01242	1.32354	7.37902	1.83615	6.67709	1.54801	1.85909	6.68776	1.32305
6.26642	12.0989	2.20957	0.769477	1.76536	1.19723	0.848848	1.92482	4.86438	6.50013	2.72397	0.649684	0.949369	1.43154	1.88449	0.906714	2.01359	1.33069	7.39682	1.83623	6.67246	1.54239	1.86207	6.74642	1.32373
6.27309	12.0707	2.21034	0.767413	1.76801	1.19835	0.84694	1.92623	4.86367	6.48783	2.73137	0.64988	0.950509	1.43183	1.88507	0.907003	2.01476	1.33793	7.41443	1.83632	6.66765	1.53654	1.86508	6.80717	1.32439
6.27976	12.0433	2.21102	0.765379	1.7707	1.19949	0.845265	1.92763	4.86281	6.47561	2.73884	0.650064	0.951693	1.43215	1.88573	0.907269	2.01596	1.34524	7.4318	1.83643	6.66268	1.53049	1.86811	6.8701	1.32505
6.28642	12.0168	2.2116	0.763385	1.77341	1.20065	0.843818	1.92902	4.86182	6.46346	2.74638	0.650235	0.952921	1.43249	1.88649	0.907509	2.0172	1.35263	7.44893	1.83655	6.65757	1.52427	1.87116	6.93524	1.32571
6.29309	11.9911	2.21209	0.761436	1.77613	1.20183	0.84259	1.9304	4.86069	6.45139	2.75398	0.650393	0.954193	1.43285	1.88735	0.907726	2.01847	1.36009	7.4658	1.83668	6.65231	1.51789	1.87421	7.00265	1.32635
6.29976	11.966	2.21248	0.75954	1.77886	1.20302	0.841578	1.93177	4.85944	6.4394	2.76164	0.650535	0.955509	1.43323	1.88832	0.907917	2.0198	1.36761	7.48238	1.83682	6.64692	1.51138	1.87727	7.07234	1.32697
6.30642	11.9414	2.21277	0.7577	1.78159	1.20424	0.840771	1.93314	4.85805	6.42749	2.76935	0.650661	0.956868	1.43364	1.88939	0.908083	2.02118	1.3752	7.49866	1.83696	6.6414	1.50476	1.88033	7.14433	1.32759
6.31309	11.9174	2.21296	0.755924	1.78431	1.20546	0.840161	1.9345	4.85652	6.41564	2.77712	0.650772	0.958271	1.43408	1.89059	0.908221	2.02263	1.38284	7.51463	1.83711	6.63576	1.49805	1.88338	7.21861	1.32819
6.31976	11.8938	2.21303	0.754214	1.78701	1.2067	0.839743	1.93585	4.85487	6.40387	2.78494	0.650865	0.959716	1.43455	1.89189	0.908331	2.02416	1.39055	7.53026	1.83726	6.63002	1.49126	1.88643	7.29517	1.32877
6.32642	11.8705	2.213	0.752577	1.78969	1.20795	0.839503	1.9372	4.85309	6.39215	2.79282	0.650941	0.961205	1.43504	1.89332	0.908415	2.02577	1.39831	7.54554	1.83743	6.62417	1.48444	1.88947	7.37397	1.32933
6.33309	11.8475	2.21287	0.751017	1.79232	1.2092	0.839435	1.93855	4.85117	6.38048	2.80075	0.650999	0.962735	1.43556	1.89487	0.908468	2.02748	1.40611	7.56046	1.8376	6.61821	1.47758	1.89249	7.45496	1.32988
6.33976	11.8246	2.21263	0.749533	1.7949	1.21047	0.839529	1.9399	4.84913	6.36885	2.80873	0.651039	0.964307	1.43611	1.89653	0.908492	2.02927	1.41397	7.57503	1.83779	6.61216	1.47072	1.89551	7.53808	1.33041
6.34642	11.8018	2.21228	0.748129	1.79742	1.21174	0.839775	1.94125	4.84697	6.35725	2.81677	0.65106	0.965921	1.43669	1.89832	0.908485	2.03117	1.42187	7.5892	1.83799	6.60601	1.46387	1.89851	7.62327	1.33093
6.35309	11.779	2.21182	0.746809	1.79986	1.21301	0.840164	1.9426	4.84469	6.34568	2.82487	0.651061	0.967575	1.4373	1.90023	0.908448	2.03318	1.42981	7.603	1.83821	6.59977	1.45706	1.9015	7.71044	1.33142
6.35976	11.7561	2.21127	0.745574	1.80221	1.21429	0.840687	1.94397	4.8423	6.33413	2.83302	0.651044	0.969269	1.43793	1.90225	0.908378	2.03529	1.4378	7.61641	1.83845	6.59343	1.4503	1.90448	7.79949	1.3319
6.36642	11.733	2.21062	0.744423	1.80446	1.21557	0.841333	1.94534	4.83981	6.32258	2.84125	0.651008	0.971003	1.4386	1.90439	0.908278	2.03752	1.44583	7.62942	1.8387	6.58698	1.44361	1.90746	7.89032	1.33236
6.37309	11.7096	2.20987	0.743353	1.80659	1.21686	0.842096	1.94672	4.83722	6.31104	2.84954	0.650952	0.972776	1.43929	1.90665	0.908144	2.03987	1.45389	7.64203	1.83898	6.58043	1.43701	1.91043	7.98282	1.33281
6.37976	11.6859	2.20902	0.742369	1.80859	1.21815	0.842965	1.94812	4.83454	6.2995	2.85791	0.650878	0.974589	1.44001	1.90901	0.907978	2.04233	1.462	7.65424	1.83929	6.57378	1.43051	1.91342	8.07687	1.33324
6.38642	11.6618	2.2081	0.741465	1.81046	1.21944	0.843932	1.94954	4.8318	6.28796	2.86636	0.650785	0.976439	1.44076	1.91149	0.907779	2.04492	1.47013	7.66604	1.83962	6.56702	1.42412	1.91641	8.17235	1.33366
6.39309	11.6373	2.20709	0.740641	1.81216	1.22073	0.84499	1.95097	4.82899	6.27641	2.8749	0.650673	0.978326	1.44154	1.91407	0.907548	2.04764	1.47831	7.67744	1.83999	6.56014	1.41787	1.91941	8.26912	1.33406
6.39976	11.6122	2.206	0.739894	1.81371	1.22203	0.846132	1.95243	4.82614	6.26486	2.88354	0.650544	0.98025	1.44234	1.91676	0.907284	2.05048	1.48651	7.68843	1.84038	6.55315	1.41177	1.92243	8.36705	1.33446
6.40642	11.5865	2.20484	0.739219	1.81507	1.22333	0.847349	1.95391	4.82326	6.25333	2.89228	0.650397	0.98221	1.44317	1.91955	0.906989	2.05344	1.49474	7.69903	1.8408	6.54602	1.40583	1.92548	8.466	1.33484
6.41309	11.5602	2.20362	0.738614	1.81625	1.22464	0.848637	1.95542	4.82038	6.24181	2.90114	0.650232	0.984205	1.44403	1.92243	0.906663	2.05654	1.503	7.70923	1.84126	6.53878	1.40005	1.92857	8.56583	1.33522
6.41976	11.5332	2.20233	0.738071	1.81723	1.22595	0.849988	1.95695	4.81751	6.23031	2.91011	0.650052	0.986237	1.44491	1.9254	0.906308	2.05976	1.51128	7.71904	1.84175	6.5314	1.39445	1.93169	8.66638	1.33559
6.42642	11.5055	2.201	0.737588	1.81801	1.22727	0.851399	1.95851	4.81468	6.21884	2.91921	0.649856	0.988303	1.44582	1.92847	0.905926	2.06311	1.51959	7.72845	1.84227	6.52388	1.38904	1.93485	8.76752	1.33595
6.43309	11.4771	2.19962	0.737157	1.81857	1.2286	0.852863	1.9601	4.8119	6.20743	2.92844	0.649645	0.990403	1.44675	1.93162	0.905516	2.06659	1.52791	7.7375	1.84282	6.51623	1.38382	1.93806	8.86909	1.33631
6.43976	11.4478	2.19819	0.736776	1.81891	1.22993	0.854378	1.96172	4.80922	6.19609	2.93782	0.649419	0.992538	1.4477	1.93486	0.905083	2.0702	1.53624	7.74617	1.8434	6.50844	1.3788	1.94132	8.97096	1.33667
6.44642	11.4178	2.19674	0.736434	1.81903	1.23128	0.855941	1.96337	4.80664	6.18483	2.94735	0.64918	0.994707	1.44868	1.93818	0.904628	2.07393	1.54458	7.75447	1.84402	6.50051	1.37397	1.94465	9.07297	1.33703
6.45309	11.387	2.19527	0.736124	1.81893	1.23265	0.85755	1.96505	4.8042	6.17368	2.95703	0.648929	0.99691	1.44967	1.94158	0.904154	2.0778	1.55292	7.76243	1.84466	6.49245	1.36936	1.94804	9.17499	1.33738
6.45976	11.3553	2.19377	0.735843	1.8186	1.23403	0.859203	1.96676	4.80192	6.16266	2.96688	0.648666	0.999147	1.45069	1.94505	0.903664	2.08179	1.56126	7.77004	1.84533	6.48425	1.36494	1.95149	9.27688	1.33774
6.46642	11.3228	2.19227	0.73558	1.81804	1.23543	0.8609	1.9685	4.79983	6.15179	2.97691	0.648392	1.00142	1.45173	1.9486	0.903161	2.08591	1.56959	7.77732	1.84602	6.47593	1.36074	1.95502	9.3785	1.3381
6.47309	11.2895	2.19076	0.735328	1.81725	1.23685	0.862643	1.97027	4.79795	6.1411	2.9871	0.648109	1.00372	1.45278	1.95221	0.90265	2.09015	1.5779	7.78429	1.84673	6.46749	1.35674	1.95862	9.47973	1.33846
6.47976	11.2554	2.18926	0.735077	1.81624	1.23829	0.864431	1.97206	4.79633	6.13059	2.99748	0.647817	1.00606	1.45386	1.95589	0.902132	2.09452	1.58619	7.79096	1.84747	6.45894	1.35295	1.9623	9.58046	1.33882
6.48642	11.2205	2.18776	0.734826	1.81501	1.23976	0.866269	1.97388	4.79497	6.12031	3.00804	0.647517	1.00844	1.45495	1.95964	0.901614	2.09902	1.59444	7.79733	1.84822	6.45029	1.34935	1.96605	9.68056	1.33918
6.49309	11.1849	2.18628	0.734558	1.81357	1.24126	0.868159	1.97572	4.79389	6.11026	3.01879	0.64721	1.01084	1.45606	1.96345	0.901098	2.10364	1.60266	7.80344	1.84899	6.44156	1.34596	1.96989	9.77991	1.33954
6.49976	11.1485	2.18482	0.734269	1.81192	1.2428	0.870105	1.97758	4.79313	6.10047	3.02974	0.646897	1.01329	1.45718	1.96732	0.900589	2.10839	1.61082	7.80928	1.84976	6.43276	1.34277	1.9738	9.87845	1.33991
6.50643	11.1114	2.18339	0.733953	1.81008	1.24436	0.872116	1.97946	4.7927	6.09095	3.04087	0.646579	1.01577	1.45832	1.97125	0.900092	2.11326	1.61893	7.81488	1.85055	6.42391	1.33977	1.9778	9.97605	1.34028
6.51309	11.0737	2.182	0.733602	1.80806	1.24597	0.874195	1.98135	4.79263	6.08173	3.0522	0.646258	1.01828	1.45948	1.97523	0.899611	2.11826	1.62698	7.82025	1.85133	6.41504	1.33696	1.98188	10.0726	1.34065
6.51976	11.0354	2.18064	0.733204	1.80586	1.24762	0.876352	1.98325	4.7929	6.0728	3.06372	0.645932	1.02084	1.46065	1.97927	0.899151	2.12338	1.63495	7.82539	1.85212	6.40616	1.33434	1.98604	10.1681	1.34102
6.52643	10.9965	2.17933	0.732757	1.80349	1.24931	0.878594	1.98516	4.79357	6.06421	3.07543	0.645606	1.02343	1.46183	1.98336	0.898716	2.12863	1.64284	7.83034	1.85291	6.39729	1.3319	1.99027	10.2625	1.34139
6.53309	10.9571	2.17806	0.732251	1.80098	1.25105	0.880932	1.98707	4.7946	6.05594	3.08733	0.645277	1.02606	1.46303	1.98749	0.898311	2.134	1.65064	7.8351	1.85369	6.38847	1.32963	1.99458	10.3556	1.34176
6.53976	10.9172	2.17685	0.731681	1.79834	1.25284	0.883376	1.98898	4.79604	6.04803	3.09942	0.644948	1.02873	1.46423	1.99167	0.89794	2.13949	1.65834	7.83968	1.85447	6.37972	1.32754	1.99896	10.4475	1.34213
6.54643	10.877	2.1757	0.731042	1.79557	1.25468	0.885936	1.99088	4.79785	6.04046	3.11169	0.64462	1.03143	1.46546	1.9959	0.897607	2.1451	1.66593	7.84409	1.85523	6.37107	1.32562	2.00341	10.5381	1.3425
6.55309	10.8364	2.1746	0.730326	1.79269	1.25659	0.888627	1.99278	4.80005	6.03326	3.12415	0.644293	1.03418	1.46669	2.00017	0.897317	2.15084	1.67341	7.84835	1.85597	6.36254	1.32386	2.00791	10.6273	1.34287
6.55976	10.7956	2.17357	0.72953	1.78972	1.25855	0.891459	1.99467	4.80264	6.02644	3.13679	0.643968	1.03697	1.46793	2.00448	0.897073	2.1567	1.68077	7.85245	1.8567	6.35417	1.32226	2.01248	10.7151	1.34323
6.56643	10.7546	2.1726	0.72865	1.78668	1.26057	0.894446	1.99654	4.80559	6.02	3.14959	0.643646	1.03979	1.46918	2.00883	0.896879	2.16268	1.688	7.85642	1.85741	6.34599	1.32082	2.0171	10.8014	1.3436
6.57309	10.7134	2.17169	0.727686	1.78357	1.26266	0.8976	1.99839	4.8089	6.01395	3.16256	0.643327	1.04266	1.47044	2.01321	0.896738	2.16878	1.69509	7.86025	1.85809	6.33803	1.31953	2.02177	10.8863	1.34396
6.57976	10.6721	2.17086	0.72663	1.78042	1.26482	0.900937	2.00022	4.81255	6.00831	3.1757	0.643013	1.04557	1.47171	2.01762	0.896653	2.17499	1.70204	7.86395	1.85875	6.33031	1.31839	2.02647	10.9697	1.34432
6.58643	10.6308	2.1701	0.725484	1.77723	1.26705	0.90447	2.00203	4.81652	6.00306	3.18899	0.642704	1.04852	1.47299	2.02206	0.896626	2.18132	1.70885	7.86752	1.85938	6.32288	1.3174	2.03121	11.0516	1.34469
6.59309	10.5895	2.16941	0.724244	1.77403	1.26935	0.908213	2.00381	4.82078	5.99824	3.20243	0.642401	1.0515	1.47428	2.02653	0.896661	2.18777	1.71551	7.87097	1.85999	6.31575	1.31654	2.03598	11.1319	1.34505
6.59976	10.5483	2.16879	0.722912	1.77083	1.27174	0.912178	2.00556	4.82533	5.99384	3.216	0.642104	1.05453	1.47557	2.03103	0.896759	2.19432	1.72201	7.87428	1.86055	6.30896	1.31583	2.04077	11.2107	1.34542
6.60643	10.5073	2.16824	0.721489	1.76764	1.2742	0.916379	2.00729	4.83011	5.98987	3.22972	0.641814	1.05759	1.47687	2.03554	0.896921	2.20099	1.72836	7.87747	1.86108	6.30255	1.31526	2.04557	11.2879	1.34579
6.61309	10.4664	2.16777	0.719977	1.76447	1.27674	0.920828	2.00897	4.83511	5.98633	3.24356	0.641532	1.0607	1.47818	2.04008	0.897149	2.20777	1.73455	7.88053	1.86158	6.29652	1.31481	2.05038	11.3635	1.34617
6.61976	10.4258	2.16736	0.718374	1.76135	1.27937	0.925535	2.01063	4.8403	5.98326	3.25753	0.641258	1.06383	1.47949	2.04463	0.897441	2.21464	1.74058	7.88345	1.86204	6.29092	1.31451	2.0552	11.4374	1.34655
6.62643	10.3855	2.16703	0.716688	1.75827	1.28209	0.930511	2.01225	4.84563	5.98064	3.27161	0.640993	1.067	1.48081	2.0492	0.897801	2.22162	1.74644	7.88622	1.86246	6.28576	1.31433	2.06001	11.5097	1.34695
6.63309	10.3455	2.16677	0.714919	1.75526	1.2849	0.935764	2.01383	4.85108	5.9785	3.28579	0.640737	1.07021	1.48213	2.05378	0.898226	2.2287	1.75215	7.88884	1.86283	6.28107	1.31428	2.06481	11.5804	1.34736
6.63976	10.3059	2.16658	0.713071	1.75233	1.28779	0.941302	2.01538	4.85661	5.97684	3.30008	0.64049	1.07344	1.48345	2.05837	0.898718	2.23587	1.7577	7.89131	1.86316	6.27687	1.31435	2.06961	11.6493	1.34778
6.64643	10.2667	2.16646	0.71115	1.74948	1.29078	0.947128	2.01689	4.86218	5.97569	3.31445	0.640254	1.0767	1.48478	2.06296	0.899275	2.24314	1.76308	7.8936	1.86345	6.27317	1.31455	2.07439	11.7166	1.34822
6.65309	10.228	2.16641	0.70916	1.74673	1.29386	0.953247	2.01836	4.86778	5.97505	3.32891	0.640027	1.07998	1.4861	2.06756	0.899894	2.25049	1.76832	7.8957	1.86369	6.27	1.31487	2.07914	11.7821	1.34868
6.65976	10.1897	2.16642	0.707106	1.74408	1.29704	0.959658	2.0198	4.87333	5.97495	3.34344	0.63981	1.08329	1.48743	2.07216	0.900577	2.25792	1.7734	7.89761	1.86389	6.26736	1.31532	2.08389	11.8459	1.34916
6.66643	10.1519	2.16649	0.704995	1.74155	1.30032	0.966361	2.0212	4.87883	5.97539	3.35805	0.639604	1.08661	1.48876	2.07676	0.90132	2.26544	1.77834	7.89931	1.86403	6.26527	1.31588	2.0886	11.908	1.34967
6.67309	10.1146	2.16663	0.702832	1.73914	1.30369	0.973351	2.02256	4.88424	5.9764	3.37271	0.639409	1.08994	1.49008	2.08136	0.902122	2.27303	1.78313	7.90079	1.86413	6.26374	1.31656	2.0933	11.9683	1.3502
6.67976	10.0778	2.16682	0.700623	1.73686	1.30716	0.98062	2.02388	4.88952	5.97801	3.38744	0.639224	1.09329	1.4914	2.08595	0.90298	2.28069	1.78779	7.90205	1.86418	6.26278	1.31736	2.09797	12.0269	1.35076
6.68643	10.0416	2.16707	0.69837	1.73471	1.31072	0.98816	2.02517	4.89465	5.98021	3.40221	0.639049	1.09664	1.49273	2.09053	0.903892	2.28842	1.79232	7.90305	1.86418	6.26238	1.31827	2.10262	12.0837	1.35134
6.69309	10.006	2.16738	0.696085	1.73269	1.31438	0.995959	2.02643	4.8996	5.98306	3.41702	0.638885	1.09999	1.49404	2.0951	0.904854	2.29622	1.79673	7.90381	1.86413	6.26255	1.31929	2.10725	12.1387	1.35196
6.69976	9.97088	2.16773	0.693772	1.73082	1.31813	1.004	2.02764	4.90434	5.98656	3.43186	0.63873	1.10334	1.49535	2.09966	0.905865	2.30408	1.80102	7.90429	1.86404	6.26329	1.32043	2.11185	12.1918	1.35261
6.70643	9.93634	2.16813	0.691437	1.7291	1.32198	1.01227	2.02883	4.90884	5.99074	3.44674	0.638584	1.10668	1.49666	2.1042	0.906922	2.31199	1.80522	7.9045	1.86389	6.2646	1.32168	2.11643	12.2432	1.35329
6.71309	9.90237	2.16858	0.689083	1.72752	1.32592	1.02073	2.02998	4.91309	5.99563	3.46163	0.638447	1.11001	1.49796	2.10872	0.908021	2.31996	1.80932	7.90442	1.8637	6.26647	1.32304	2.121	12.2928	1.35399
6.71976	9.86896	2.16907	0.686715	1.72609	1.32995	1.02938	2.0311	4.91707	6.00125	3.47655	0.638319	1.11333	1.49925	2.11323	0.90916	2.32798	1.81334	7.90405	1.86345	6.26889	1.32451	2.12554	12.3406	1.35473
6.72643	9.8361	2.16959	0.684343	1.72481	1.33406	1.03819	2.03218	4.92077	6.00763	3.49147	0.638198	1.11661	1.50053	2.1177	0.910334	2.33605	1.81728	7.90339	1.86316	6.27186	1.32608	2.13007	12.3866	1.3555
6.73309	9.80381	2.17015	0.681969	1.72367	1.33826	1.04712	2.03323	4.92417	6.01479	3.5064	0.638084	1.11987	1.5018	2.12216	0.911542	2.34416	1.82117	7.90243	1.86283	6.27535	1.32776	2.13458	12.4307	1.3563
6.73976	9.77204	2.17074	0.679594	1.72268	1.34254	1.05614	2.03424	4.92726	6.02278	3.52133	0.637975	1.1231	1.50307	2.12658	0.91278	2.35231	1.82501	7.90118	1.86244	6.27936	1.32954	2.13907	12.4731	1.35712
6.74643	9.74081	2.17136	0.677225	1.72183	1.34689	1.06522	2.03523	4.93004	6.0316	3.53625	0.637871	1.12629	1.50432	2.13098	0.914044	2.3605	1.82881	7.89963	1.86202	6.28387	1.33143	2.14355	12.5136	1.35797
6.75309	9.71009	2.172	0.674863	1.72112	1.35132	1.07433	2.03618	4.93252	6.0413	3.55116	0.637771	1.12944	1.50556	2.13534	0.915332	2.36873	1.8326	7.8978	1.86155	6.28887	1.33342	2.14802	12.5523	1.35884
6.75976	9.67987	2.17267	0.672515	1.72055	1.35581	1.08344	2.03709	4.93467	6.0519	3.56606	0.637673	1.13254	1.50679	2.13967	0.916641	2.37699	1.83638	7.8957	1.86104	6.29432	1.33551	2.15247	12.5892	1.35973
6.76643	9.65014	2.17334	0.670181	1.72012	1.36037	1.09249	2.03797	4.93653	6.06342	3.58094	0.637577	1.13559	1.50801	2.14395	0.917967	2.38527	1.84017	7.89333	1.8605	6.30022	1.3377	2.15691	12.6243	1.36063
6.77309	9.62087	2.17403	0.667862	1.71981	1.36498	1.10146	2.03881	4.93808	6.07589	3.59579	0.637479	1.13858	1.50921	2.1482	0.919309	2.39359	1.84398	7.89072	1.85992	6.30655	1.33998	2.16133	12.6575	1.36155
6.77976	9.59206	2.17473	0.665563	1.71963	1.36964	1.1103	2.03961	4.93933	6.08935	3.61063	0.63738	1.14152	1.5104	2.1524	0.920662	2.40194	1.84783	7.8879	1.8593	6.31327	1.34236	2.16574	12.689	1.36249
6.78643	9.56368	2.17544	0.663283	1.71957	1.37434	1.11897	2.04038	4.94031	6.10381	3.62543	0.637276	1.14439	1.51158	2.15656	0.922025	2.41031	1.85174	7.88487	1.85866	6.32036	1.34483	2.17014	12.7186	1.36342
6.79309	9.53571	2.17615	0.661025	1.71962	1.37909	1.12745	2.0411	4.94102	6.11929	3.6402	0.637168	1.14719	1.51274	2.16067	0.923395	2.41871	1.85571	7.88168	1.85799	6.32781	1.3474	2.17453	12.7463	1.36437
6.79976	9.50813	2.17685	0.65879	1.71978	1.38386	1.13567	2.04178	4.94148	6.13583	3.65493	0.637052	1.14992	1.51388	2.16472	0.924769	2.42712	1.85978	7.87836	1.85729	6.33558	1.35006	2.17889	12.7722	1.36531
6.80643	9.48094	2.17756	0.656577	1.72004	1.38866	1.14361	2.04242	4.9417	6.15345	3.66963	0.636927	1.15258	1.51501	2.16873	0.926144	2.43556	1.86395	7.87494	1.85657	6.34365	1.3528	2.18325	12.7964	1.36626
6.81309	9.45409	2.17825	0.654388	1.72041	1.39348	1.15123	2.04301	4.94169	6.17216	3.68429	0.636791	1.15517	1.51613	2.17268	0.92752	2.44402	1.86824	7.87146	1.85583	6.352	1.35563	2.18758	12.8186	1.3672
6.81976	9.42758	2.17894	0.652221	1.72086	1.39831	1.15849	2.04354	4.94148	6.19198	3.69891	0.636642	1.15768	1.51722	2.17658	0.928894	2.4525	1.87266	7.86798	1.85508	6.36059	1.35854	2.1919	12.8391	1.36813
6.82643	9.40139	2.17962	0.650078	1.7214	1.40314	1.16536	2.04403	4.94109	6.21294	3.71349	0.636477	1.1601	1.51831	2.18042	0.930263	2.46099	1.87724	7.86452	1.85432	6.36942	1.36154	2.19621	12.8577	1.36905
6.83309	9.37549	2.18028	0.647959	1.72202	1.40798	1.1718	2.04445	4.94052	6.23504	3.72802	0.636295	1.16246	1.51937	2.1842	0.931625	2.4695	1.882	7.86115	1.85355	6.37844	1.36461	2.2005	12.8745	1.36996
6.83976	9.34987	2.18093	0.645862	1.72271	1.4128	1.17778	2.04482	4.93981	6.2583	3.74252	0.636093	1.16472	1.52042	2.18792	0.93298	2.47803	1.88694	7.85793	1.85277	6.38763	1.36776	2.20477	12.8895	1.37085
6.84643	9.32451	2.18157	0.64379	1.72348	1.41761	1.18327	2.04513	4.93896	6.28273	3.75697	0.635868	1.16691	1.52145	2.19158	0.934325	2.48657	1.89209	7.85488	1.852	6.39698	1.37098	2.20902	12.9027	1.37172
6.85309	9.29939	2.18218	0.64174	1.7243	1.42239	1.18824	2.04536	4.93798	6.30833	3.77137	0.63562	1.16902	1.52247	2.19518	0.935658	2.49512	1.89746	7.85208	1.85122	6.40645	1.37427	2.21326	12.9142	1.37258
6.85976	9.27449	2.18278	0.639713	1.72519	1.42714	1.19268	2.04554	4.93691	6.33512	3.78574	0.635344	1.17105	1.52346	2.19873	0.936978	2.50369	1.90307	7.84959	1.85045	6.41603	1.37763	2.21749	12.9239	1.37341
6.86643	9.24979	2.18336	0.637707	1.72613	1.43186	1.19655	2.04563	4.93574	6.36309	3.80007	0.63504	1.17301	1.52445	2.20221	0.938284	2.51227	1.90893	7.84745	1.84969	6.42569	1.38105	2.2217	12.932	1.37422
6.87309	9.22528	2.18393	0.635725	1.72711	1.43653	1.19985	2.04566	4.93449	6.39226	3.81435	0.634705	1.17488	1.52541	2.20563	0.939575	2.52086	1.91507	7.84573	1.84894	6.43542	1.38454	2.2259	12.9384	1.37501
6.87976	9.20093	2.18447	0.633765	1.72814	1.44115	1.20255	2.0456	4.93316	6.4226	3.8286	0.634336	1.17669	1.52635	2.209	0.940847	2.52945	1.9215	7.84449	1.84821	6.44518	1.38808	2.23009	12.9432	1.37577
6.88643	9.17673	2.185	0.631828	1.72922	1.44572	1.20466	2.04547	4.93178	6.45412	3.84281	0.633931	1.17842	1.52728	2.21231	0.942102	2.53806	1.92823	7.84378	1.8475	6.45498	1.39167	2.23427	12.9464	1.3765
6.89309	9.15267	2.18551	0.629912	1.73032	1.45022	1.20615	2.04525	4.93034	6.48682	3.85698	0.633488	1.18008	1.52819	2.21556	0.943337	2.54668	1.93528	7.84366	1.8468	6.46478	1.39532	2.23845	12.9481	1.3772
6.89976	9.12874	2.186	0.62802	1.73147	1.45466	1.20703	2.04495	4.92885	6.52069	3.87113	0.633006	1.18167	1.52909	2.21876	0.944551	2.5553	1.94267	7.84419	1.84613	6.47457	1.39901	2.24262	12.9484	1.37787
6.90643	9.10491	2.18648	0.626152	1.73264	1.45902	1.20729	2.04456	4.92732	6.55569	3.88525	0.632482	1.18321	1.52996	2.22191	0.945743	2.56393	1.9504	7.84542	1.84548	6.48434	1.40274	2.24678	12.9473	1.37851
6.91309	9.08117	2.18695	0.624309	1.73383	1.4633	1.20695	2.04408	4.92575	6.59183	3.89934	0.631914	1.18469	1.53082	2.22501	0.946913	2.57256	1.9585	7.84739	1.84486	6.49408	1.40651	2.25094	12.9448	1.37912
6.91976	9.0575	2.1874	0.622489	1.73505	1.46751	1.206	2.04352	4.92414	6.62908	3.91341	0.631301	1.18611	1.53165	2.22807	0.948058	2.5812	1.96697	7.85017	1.84427	6.50377	1.41031	2.25511	12.9411	1.37969
6.92643	9.03391	2.18785	0.620699	1.7363	1.47162	1.20446	2.04287	4.92249	6.66742	3.92747	0.630641	1.18748	1.53247	2.23109	0.949176	2.58983	1.97583	7.85379	1.8437	6.5134	1.41414	2.25928	12.9363	1.38022
6.93309	9.01038	2.18828	0.618935	1.73756	1.47565	1.20234	2.04213	4.9208	6.70682	3.94151	0.629934	1.18881	1.53326	2.23406	0.95027	2.59847	1.9851	7.8583	1.84317	6.52297	1.41799	2.26345	12.9303	1.38071
6.93976	8.98689	2.18872	0.617201	1.73885	1.47958	1.19966	2.04131	4.91907	6.74726	3.95554	0.629176	1.1901	1.53404	2.23701	0.951336	2.60711	1.99477	7.86375	1.84267	6.53247	1.42186	2.26764	12.9233	1.38116
6.94643	8.96343	2.18915	0.615497	1.74015	1.48341	1.19644	2.0404	4.9173	6.78869	3.96957	0.628369	1.19135	1.53479	2.23992	0.952375	2.61575	2.00487	7.87017	1.8422	6.54188	1.42575	2.27183	12.9154	1.38157
6.95309	8.94002	2.18958	0.613827	1.74148	1.48715	1.1927	2.03941	4.9155	6.83109	3.9836	0.627511	1.19257	1.53553	2.24281	0.953383	2.62439	2.01539	7.8776	1.84176	6.55122	1.42965	2.27604	12.9066	1.38194
6.95976	8.91662	2.19002	0.612192	1.74282	1.49078	1.18847	2.03835	4.91365	6.87442	3.99763	0.626601	1.19377	1.53623	2.24568	0.954362	2.63302	2.02636	7.88606	1.84136	6.56046	1.43355	2.28026	12.897	1.38227
6.96643	8.89325	2.19046	0.610594	1.74418	1.49431	1.18378	2.0372	4.91177	6.91863	4.01167	0.625639	1.19494	1.53692	2.24853	0.95531	2.64165	2.03778	7.89559	1.841	6.56962	1.43745	2.2845	12.8868	1.38254
6.97309	8.8699	2.19091	0.609035	1.74556	1.49773	1.17866	2.03599	4.90984	6.96369	4.02573	0.624627	1.19609	1.53758	2.25137	0.956227	2.65027	2.04965	7.90622	1.84066	6.57869	1.44135	2.28876	12.8759	1.38277
6.97976	8.84656	2.19138	0.607519	1.74697	1.50104	1.17314	2.03472	4.90787	7.00953	4.03981	0.623562	1.19723	1.53821	2.25421	0.957111	2.65889	2.06199	7.91796	1.84037	6.58766	1.44525	2.29304	12.8645	1.38295
6.98643	8.82324	2.19186	0.606046	1.7484	1.50424	1.16726	2.03338	4.90586	7.05612	4.05391	0.622448	1.19837	1.53882	2.25704	0.957962	2.6675	2.07478	7.93084	1.84011	6.59654	1.44913	2.29734	12.8527	1.38308
6.99309	8.79995	2.19235	0.604622	1.74985	1.50734	1.16105	2.03199	4.90381	7.10339	4.06804	0.621282	1.19949	1.53939	2.25989	0.958781	2.6761	2.08805	7.94487	1.83989	6.60533	1.45299	2.30167	12.8406	1.38316
6.99976	8.77667	2.19287	0.603247	1.75133	1.51033	1.15456	2.03055	4.90172	7.15129	4.0822	0.620068	1.20062	1.53994	2.26274	0.959565	2.6847	2.10179	7.96006	1.8397	6.61404	1.45683	2.30602	12.8282	1.38319
7.00643	8.75342	2.19342	0.601925	1.75284	1.5132	1.14782	2.02907	4.89958	7.19977	4.09641	0.618806	1.20175	1.54046	2.26561	0.960315	2.69329	2.116	7.97642	1.83956	6.62266	1.46064	2.3104	12.8156	1.38316
7.01309	8.7302	2.19399	0.600659	1.75437	1.51598	1.14088	2.02756	4.89741	7.24875	4.11066	0.617497	1.20289	1.54094	2.26851	0.961031	2.70187	2.13068	7.99397	1.83946	6.63119	1.46442	2.31481	12.803	1.38309
7.01976	8.70702	2.19459	0.59945	1.75594	1.51864	1.13377	2.02602	4.8952	7.29818	4.12497	0.616144	1.20404	1.5414	2.27143	0.961714	2.71045	2.14584	8.0127	1.8394	6.63965	1.46816	2.31925	12.7903	1.38295
7.02643	8.68389	2.19523	0.598304	1.75755	1.52119	1.12653	2.02446	4.89294	7.34799	4.13932	0.614749	1.2052	1.54182	2.27439	0.96236	2.71902	2.16147	8.03262	1.83939	6.64803	1.47187	2.32372	12.7777	1.38277
7.03309	8.66082	2.19591	0.597222	1.75919	1.52364	1.11921	2.02288	4.89065	7.39811	4.15375	0.613314	1.20638	1.5422	2.27738	0.962974	2.72758	2.17756	8.05372	1.83942	6.65635	1.47553	2.32822	12.7653	1.38253
7.03976	8.63782	2.19662	0.596206	1.76087	1.52598	1.11185	2.0213	4.88832	7.44847	4.16823	0.61184	1.20758	1.54255	2.28043	0.963554	2.73614	2.1941	8.07601	1.83951	6.66459	1.47914	2.33276	12.7531	1.38224
7.04643	8.6149	2.19738	0.595261	1.76259	1.52822	1.10448	2.01972	4.88594	7.49899	4.18279	0.610332	1.2088	1.54286	2.28352	0.964102	2.7447	2.21111	8.09948	1.83964	6.67278	1.48269	2.33733	12.7413	1.3819
7.05309	8.59208	2.19818	0.594387	1.76435	1.53036	1.09715	2.01816	4.88352	7.5496	4.19743	0.608792	1.21004	1.54313	2.28667	0.964616	2.75325	2.22856	8.12411	1.83984	6.68092	1.48619	2.34193	12.7299	1.38151
7.05976	8.56937	2.19903	0.59359	1.76615	1.5324	1.08989	2.0166	4.88105	7.60024	4.21214	0.607223	1.21131	1.54336	2.28988	0.965099	2.76181	2.24644	8.1499	1.84009	6.689	1.48962	2.34657	12.7189	1.38107
7.06643	8.54678	2.19993	0.592867	1.76799	1.53433	1.08274	2.01507	4.87853	7.65082	4.22694	0.605627	1.21261	1.54355	2.29315	0.96555	2.77036	2.26476	8.17684	1.84041	6.69703	1.49299	2.35125	12.7084	1.38058
7.07309	8.52434	2.20088	0.592227	1.76987	1.53617	1.07573	2.01358	4.87596	7.70128	4.24183	0.60401	1.21393	1.54371	2.2965	0.965973	2.77892	2.28348	8.20491	1.84078	6.70503	1.4963	2.35596	12.6985	1.38005
7.07976	8.50205	2.20189	0.591667	1.7718	1.53792	1.0689	2.01212	4.87333	7.75152	4.25681	0.602374	1.21528	1.54382	2.29991	0.966368	2.78749	2.3026	8.2341	1.84123	6.71299	1.49952	2.36072	12.6892	1.37948
7.08643	8.47994	2.20295	0.591191	1.77377	1.53957	1.06228	2.0107	4.87064	7.80149	4.27189	0.600722	1.21666	1.54389	2.3034	0.966734	2.79606	2.32211	8.26438	1.84174	6.72091	1.50267	2.36551	12.6806	1.37887
7.09309	8.45802	2.20407	0.590801	1.77578	1.54113	1.05589	2.00933	4.86787	7.85111	4.28707	0.599059	1.21808	1.54391	2.30697	0.967076	2.80464	2.34199	8.29574	1.84233	6.72882	1.50574	2.37034	12.6728	1.37822
7.09976	8.43631	2.20525	0.590499	1.77784	1.54261	1.04976	2.00802	4.86503	7.90029	4.30236	0.597389	1.21952	1.5439	2.31061	0.967393	2.81323	2.36221	8.32816	1.84298	6.7367	1.50873	2.37522	12.6657	1.37755
7.10643	8.41483	2.20649	0.590286	1.77993	1.54399	1.04391	2.00677	4.86211	7.94898	4.31774	0.595715	1.22099	1.54384	2.31434	0.967689	2.82184	2.38277	8.36163	1.84371	6.74457	1.51163	2.38013	12.6594	1.37684
7.1131	8.3936	2.2078	0.590164	1.78206	1.54529	1.03838	2.00558	4.8591	7.9971	4.33324	0.594042	1.2225	1.54375	2.31814	0.967965	2.83047	2.40363	8.39608	1.84451	6.75243	1.51443	2.38508	12.654	1.37611
7.11976	8.37263	2.20917	0.590135	1.78422	1.54651	1.03316	2.00447	4.85599	8.04458	4.34885	0.592372	1.22404	1.54361	2.32203	0.968223	2.83912	2.42478	8.43153	1.84539	6.76027	1.51715	2.39007	12.6494	1.37536
7.12643	8.35195	2.2106	0.590195	1.78641	1.54764	1.02829	2.00343	4.85278	8.09135	4.36457	0.590712	1.22561	1.54343	2.32599	0.968463	2.84779	2.44619	8.46792	1.84634	6.76812	1.51977	2.39511	12.6458	1.37459
7.1331	8.33157	2.2121	0.590351	1.78864	1.5487	1.02377	2.00247	4.84947	8.13735	4.3804	0.589063	1.2272	1.54321	2.33004	0.968689	2.8565	2.46784	8.50524	1.84737	6.77596	1.52229	2.40018	12.6429	1.37381
7.13976	8.3115	2.21367	0.5906	1.79089	1.54968	1.01961	2.0016	4.84605	8.18253	4.39634	0.587432	1.22884	1.54296	2.33416	0.968903	2.86523	2.4897	8.54345	1.84847	6.78381	1.52472	2.4053	12.641	1.37303
7.14643	8.29177	2.2153	0.590943	1.79316	1.55059	1.01583	2.00081	4.84252	8.22681	4.41239	0.585822	1.2305	1.54267	2.33836	0.969107	2.874	2.51175	8.58251	1.84963	6.79167	1.52704	2.41045	12.6401	1.37225
7.1531	8.27239	2.21701	0.59138	1.79545	1.55143	1.01243	2.00011	4.83887	8.27014	4.42855	0.584235	1.23219	1.54234	2.34262	0.969302	2.88281	2.53395	8.6224	1.85087	6.79953	1.52925	2.41565	12.64	1.37147
7.15976	8.25339	2.21878	0.591909	1.79776	1.55219	1.00941	1.9995	4.83511	8.31249	4.44482	0.582676	1.23391	1.54198	2.34695	0.969492	2.89166	2.55627	8.66307	1.85217	6.80742	1.53136	2.42088	12.6408	1.3707
7.16643	8.23476	2.22061	0.59253	1.80008	1.5529	1.00677	1.99899	4.83123	8.35378	4.46119	0.581151	1.23566	1.54159	2.35135	0.969677	2.90055	2.57869	8.70449	1.85354	6.81532	1.53337	2.42615	12.6425	1.36995
7.1731	8.21653	2.22252	0.593243	1.8024	1.55353	1.00452	1.99858	4.82722	8.39399	4.47766	0.579661	1.23744	1.54117	2.35581	0.969861	2.9095	2.60117	8.74661	1.85496	6.82325	1.53527	2.43146	12.6451	1.36923
7.17976	8.19871	2.22449	0.594045	1.80473	1.55411	1.00264	1.99826	4.82312	8.43308	4.49423	0.578209	1.23925	1.54072	2.36032	0.970044	2.9185	2.62369	8.78939	1.85645	6.8312	1.53706	2.4368	12.6486	1.36852
7.18643	8.18131	2.22652	0.594935	1.80706	1.55464	1.00114	1.99804	4.81889	8.471	4.51089	0.576801	1.24109	1.54025	2.36487	0.97023	2.92755	2.6462	8.83279	1.85798	6.83918	1.53874	2.44218	12.6529	1.36785
7.1931	8.16435	2.22862	0.595911	1.80939	1.5551	1.00001	1.99792	4.81457	8.50775	4.52764	0.575439	1.24296	1.53976	2.36948	0.970418	2.93667	2.66867	8.87676	1.85956	6.8472	1.54032	2.44759	12.6581	1.36722
7.19976	8.14783	2.23078	0.596969	1.81171	1.55552	0.999245	1.9979	4.81014	8.54328	4.54446	0.574125	1.24486	1.53925	2.37412	0.970613	2.94585	2.69108	8.92126	1.86119	6.85525	1.54179	2.45304	12.6641	1.36663
7.20643	8.13177	2.23301	0.598107	1.81402	1.55589	0.998827	1.99799	4.80564	8.57759	4.56136	0.572864	1.24678	1.53873	2.37879	0.970815	2.95509	2.71338	8.96623	1.86286	6.86334	1.54315	2.45852	12.6709	1.3661
7.2131	8.11618	2.23529	0.599322	1.81632	1.55621	0.99875	1.99817	4.80105	8.61065	4.57831	0.571656	1.24874	1.5382	2.38349	0.971026	2.96441	2.73554	9.01162	1.86456	6.87147	1.5444	2.46402	12.6784	1.36561
7.21976	8.10105	2.23764	0.600608	1.8186	1.5565	0.999001	1.99846	4.7964	8.64248	4.59531	0.570505	1.25072	1.53766	2.38822	0.971248	2.9738	2.75753	9.05739	1.8663	6.87966	1.54555	2.46955	12.6867	1.36518
7.22643	8.0864	2.24004	0.601965	1.82086	1.55674	0.999568	1.99884	4.7917	8.67305	4.61236	0.569413	1.25274	1.53711	2.39296	0.971482	2.98327	2.77931	9.10347	1.86807	6.8879	1.5466	2.47511	12.6957	1.36481
7.2331	8.07223	2.2425	0.603383	1.8231	1.55695	1.00044	1.99933	4.78697	8.70238	4.62944	0.568382	1.25479	1.53657	2.39771	0.971729	2.99281	2.80085	9.14983	1.86986	6.89618	1.54755	2.4807	12.7054	1.3645
7.23976	8.05854	2.24501	0.604863	1.82531	1.55714	1.00159	1.99991	4.78221	8.73049	4.64653	0.567414	1.25686	1.53603	2.40247	0.971991	3.00243	2.82212	9.19639	1.87168	6.90453	1.5484	2.48631	12.7157	1.36427
7.24643	8.04533	2.24756	0.606397	1.8275	1.55729	1.00302	2.00059	4.77746	8.75739	4.66362	0.566511	1.25897	1.53549	2.40724	0.97227	3.01214	2.84308	9.2431	1.87351	6.91293	1.54915	2.49193	12.7266	1.3641
7.2531	8.0326	2.25017	0.607979	1.82966	1.55742	1.00469	2.00136	4.77273	8.78309	4.68071	0.565672	1.26111	1.53497	2.41201	0.972565	3.02193	2.8637	9.2899	1.87535	6.9214	1.54981	2.49758	12.7381	1.36401
7.25976	8.02037	2.25282	0.609605	1.8318	1.55754	1.00661	2.00223	4.76803	8.80764	4.69776	0.564901	1.26328	1.53446	2.41678	0.972879	3.03181	2.88395	9.33675	1.87721	6.92994	1.55038	2.50325	12.75	1.36399
7.26643	8.00861	2.25551	0.611267	1.8339	1.55764	1.00875	2.00319	4.76339	8.83105	4.71478	0.564198	1.26549	1.53398	2.42154	0.973213	3.04176	2.9038	9.38358	1.87908	6.93854	1.55087	2.50893	12.7624	1.36405
7.2731	7.99733	2.25825	0.612963	1.83597	1.55772	1.01109	2.00423	4.75883	8.85338	4.73175	0.563563	1.26773	1.53351	2.4263	0.973566	3.05181	2.92322	9.43033	1.88096	6.94722	1.55127	2.51463	12.7752	1.36419
7.27976	7.98651	2.26101	0.614683	1.83801	1.5578	1.01362	2.00536	4.75437	8.87465	4.74864	0.562997	1.27001	1.53307	2.43105	0.973939	3.06194	2.94219	9.47695	1.88284	6.95596	1.5516	2.52035	12.7884	1.36441
7.28643	7.97615	2.26382	0.616421	1.84002	1.55787	1.01632	2.00658	4.75004	8.89493	4.76544	0.562501	1.27232	1.53266	2.43579	0.974334	3.07216	2.96068	9.52338	1.88473	6.96479	1.55186	2.52608	12.8018	1.3647
7.2931	7.96623	2.26665	0.618173	1.842	1.55794	1.01918	2.00787	4.74585	8.91424	4.78213	0.562073	1.27466	1.53228	2.44052	0.974751	3.08245	2.97866	9.56956	1.88662	6.97368	1.55204	2.53183	12.8155	1.36508
7.29976	7.95676	2.26951	0.619931	1.84395	1.55802	1.02217	2.00923	4.74183	8.93265	4.7987	0.561716	1.27704	1.53194	2.44524	0.97519	3.09283	2.9961	9.61544	1.88851	6.98266	1.55217	2.53759	12.8294	1.36552
7.30643	7.9477	2.27239	0.621688	1.84587	1.55809	1.02528	2.01067	4.738	8.95022	4.81512	0.561428	1.27946	1.53164	2.44995	0.975651	3.10329	3.013	9.66097	1.8904	6.9917	1.55225	2.54336	12.8433	1.36605
7.3131	7.93905	2.2753	0.623438	1.84775	1.55818	1.0285	2.01218	4.73438	8.967	4.83138	0.561209	1.28191	1.53138	2.45465	0.976135	3.11383	3.02934	9.70609	1.89229	7.00083	1.55227	2.54915	12.8573	1.36665
7.31976	7.93079	2.27822	0.625176	1.84961	1.55828	1.0318	2.01374	4.73099	8.98303	4.84746	0.561058	1.2844	1.53117	2.45935	0.976642	3.12444	3.04508	9.75077	1.89419	7.01003	1.55226	2.55495	12.8712	1.36732
7.32643	7.9229	2.28116	0.626895	1.85144	1.55839	1.03518	2.01537	4.72786	8.99839	4.86333	0.560976	1.28693	1.531	2.46404	0.977171	3.13512	3.06023	9.79494	1.89608	7.0193	1.5522	2.56077	12.8849	1.36806
7.3331	7.91536	2.28411	0.628588	1.85323	1.55852	1.03862	2.01705	4.72499	9.01313	4.87899	0.560961	1.28949	1.53088	2.46873	0.977724	3.14587	3.07476	9.83857	1.89798	7.02864	1.55212	2.5666	12.8984	1.36887
7.33976	7.90815	2.28707	0.630252	1.855	1.55867	1.0421	2.01877	4.72241	9.02731	4.8944	0.561013	1.29209	1.53082	2.47342	0.978299	3.15669	3.08867	9.88161	1.89987	7.03805	1.55202	2.57244	12.9117	1.36974
7.34643	7.90123	2.29004	0.63188	1.85675	1.55884	1.04562	2.02054	4.72014	9.04098	4.90955	0.56113	1.29472	1.5308	2.47811	0.978897	3.16756	3.10194	9.92403	1.90178	7.04752	1.55191	2.5783	12.9245	1.37067
7.3531	7.89458	2.29301	0.633466	1.85847	1.55904	1.04915	2.02235	4.71819	9.05419	4.92442	0.561313	1.29739	1.53084	2.4828	0.979516	3.17849	3.11457	9.96579	1.90368	7.05705	1.55178	2.58417	12.9368	1.37166
7.35976	7.88818	2.29598	0.635007	1.86016	1.55926	1.0527	2.02419	4.71658	9.06702	4.93899	0.561559	1.30009	1.53094	2.4875	0.980159	3.18947	3.12656	10.0068	1.90559	7.06663	1.55166	2.59006	12.9485	1.37271
7.36643	7.882	2.29895	0.636498	1.86182	1.55951	1.05625	2.02605	4.71531	9.0795	4.95325	0.561867	1.30282	1.53109	2.49221	0.980823	3.20049	3.1379	10.0472	1.90752	7.07627	1.55155	2.59596	12.9595	1.37381
7.3731	7.876	2.30192	0.637935	1.86347	1.55979	1.05978	2.02794	4.71441	9.09169	4.96716	0.562237	1.30558	1.53129	2.49694	0.981508	3.21155	3.14859	10.0867	1.90945	7.08593	1.55146	2.60188	12.9697	1.37497
7.37976	7.87017	2.30488	0.639315	1.86508	1.5601	1.0633	2.02985	4.71387	9.10362	4.98072	0.562667	1.30837	1.53156	2.50169	0.982213	3.22265	3.15863	10.1255	1.91139	7.09563	1.55139	2.60781	12.9789	1.37616
7.38643	7.86445	2.30783	0.640637	1.86668	1.56045	1.06679	2.03176	4.71371	9.11534	4.9939	0.563156	1.31119	1.53187	2.50646	0.98294	3.23378	3.16803	10.1635	1.91335	7.10536	1.55136	2.61376	12.9871	1.37741
7.3931	7.85882	2.31077	0.641895	1.86825	1.56083	1.07024	2.03367	4.71393	9.12688	5.00669	0.563701	1.31403	1.53225	2.51126	0.983686	3.24492	3.17678	10.2007	1.91533	7.1151	1.55137	2.61973	12.9941	1.37869
7.39976	7.85325	2.31369	0.64309	1.8698	1.56124	1.07364	2.03558	4.71454	9.1383	5.01907	0.564303	1.31689	1.53267	2.51609	0.984453	3.25609	3.18491	10.2371	1.91733	7.12484	1.55143	2.62571	12.9998	1.38002
7.40643	7.8477	2.3166	0.644219	1.87133	1.5617	1.077	2.03749	4.71553	9.14961	5.03101	0.564958	1.31977	1.53315	2.52096	0.985239	3.26727	3.19241	10.2726	1.91934	7.13459	1.55154	2.63172	13.0041	1.38139
7.4131	7.84215	2.31949	0.645281	1.87283	1.5622	1.08031	2.03937	4.71691	9.16084	5.04251	0.565666	1.32266	1.53368	2.52587	0.986043	3.27845	3.1993	10.3072	1.92139	7.14431	1.55172	2.63775	13.0069	1.38279
7.41976	7.83656	2.32236	0.646278	1.87431	1.56273	1.08355	2.04124	4.71868	9.17201	5.05355	0.566424	1.32557	1.53426	2.53083	0.986867	3.28963	3.20558	10.341	1.92346	7.15401	1.55198	2.6438	13.008	1.38422
7.42643	7.83088	2.32521	0.647209	1.87577	1.56331	1.08674	2.04307	4.72083	9.18314	5.06411	0.567231	1.32849	1.53489	2.53585	0.987709	3.30081	3.21127	10.3739	1.92556	7.16367	1.55232	2.64987	13.0073	1.38569
7.4331	7.8251	2.32804	0.648075	1.8772	1.56392	1.08985	2.04488	4.72337	9.19424	5.07418	0.568084	1.33142	1.53556	2.54092	0.98857	3.31198	3.21639	10.4059	1.92769	7.17328	1.55274	2.65597	13.0047	1.38719
7.43976	7.81918	2.33084	0.648879	1.87862	1.56458	1.0929	2.04664	4.72628	9.20533	5.08375	0.568983	1.33435	1.53628	2.54606	0.989448	3.32314	3.22095	10.4371	1.92985	7.18283	1.55326	2.6621	13	1.38871
7.44643	7.81309	2.33362	0.649621	1.88001	1.56529	1.09587	2.04836	4.72955	9.2164	5.09279	0.569924	1.33727	1.53703	2.55127	0.990344	3.33427	3.22497	10.4673	1.93205	7.19229	1.55388	2.66826	12.9933	1.39027
7.4531	7.80681	2.33636	0.650305	1.88138	1.56603	1.09877	2.05002	4.73319	9.22747	5.10131	0.570905	1.3402	1.53783	2.55655	0.991257	3.34538	3.22845	10.4967	1.93429	7.20168	1.55461	2.67445	12.9842	1.39185
7.45976	7.80031	2.33908	0.650933	1.88272	1.56683	1.1016	2.05163	4.73718	9.23854	5.10929	0.571924	1.34311	1.53865	2.56191	0.992188	3.35646	3.23144	10.5253	1.93657	7.21096	1.55545	2.68068	12.9727	1.39346
7.46643	7.79355	2.34177	0.65151	1.88404	1.56767	1.10435	2.05318	4.7415	9.24958	5.11673	0.572978	1.34601	1.53951	2.56736	0.993136	3.36751	3.23393	10.5529	1.93889	7.22012	1.55641	2.68694	12.9588	1.39509
7.4731	7.78654	2.34442	0.652038	1.88534	1.56856	1.10702	2.05465	4.74616	9.2606	5.12361	0.574066	1.3489	1.5404	2.57291	0.9941	3.37852	3.23596	10.5797	1.94124	7.22917	1.55749	2.69325	12.9423	1.39675
7.47976	7.77923	2.34705	0.652522	1.88662	1.56949	1.10961	2.05606	4.75113	9.27159	5.12993	0.575184	1.35176	1.54131	2.57855	0.995083	3.38949	3.23754	10.6056	1.94364	7.23807	1.5587	2.6996	12.9231	1.39843
7.48643	7.77161	2.34964	0.652966	1.88788	1.57047	1.11212	2.05738	4.75642	9.28254	5.13568	0.57633	1.3546	1.54225	2.5843	0.996081	3.40042	3.23869	10.6306	1.94609	7.24682	1.56003	2.70599	12.9011	1.40013
7.4931	7.76369	2.35219	0.653377	1.88912	1.5715	1.11456	2.05862	4.762	9.29343	5.14086	0.5775	1.35741	1.5432	2.59015	0.997097	3.4113	3.23944	10.6548	1.94857	7.25542	1.56151	2.71243	12.8763	1.40186
7.49976	7.75542	2.35472	0.653758	1.89034	1.57258	1.11692	2.05978	4.76786	9.30424	5.14547	0.578693	1.36019	1.54417	2.59612	0.998128	3.42213	3.23981	10.6782	1.95109	7.26383	1.56312	2.71893	12.8486	1.4036
7.50643	7.74681	2.3572	0.654115	1.89154	1.57371	1.1192	2.06084	4.774	9.31495	5.14952	0.579905	1.36293	1.54515	2.60221	0.999176	3.43292	3.23981	10.7007	1.95366	7.27207	1.56486	2.72547	12.818	1.40537
7.5131	7.73787	2.35966	0.654453	1.89272	1.57489	1.1214	2.06181	4.78041	9.32555	5.15299	0.581134	1.36563	1.54614	2.60842	1.00024	3.44365	3.23948	10.7224	1.95626	7.28011	1.56675	2.73208	12.7844	1.40715
7.51976	7.72858	2.36208	0.654778	1.89389	1.57612	1.12353	2.06269	4.78706	9.33601	5.1559	0.582375	1.36829	1.54714	2.61476	1.00132	3.45433	3.23883	10.7433	1.95891	7.28796	1.56877	2.73874	12.7477	1.40895
7.52643	7.71894	2.36446	0.655097	1.89504	1.5774	1.12559	2.06346	4.79396	9.34632	5.15825	0.583627	1.3709	1.54814	2.62123	1.00241	3.46496	3.23789	10.7633	1.96158	7.29559	1.57093	2.74546	12.7079	1.41077
7.5331	7.70896	2.36681	0.655412	1.89619	1.57873	1.12757	2.06414	4.8011	9.35645	5.16006	0.584886	1.37346	1.54914	2.62784	1.00352	3.47554	3.23667	10.7826	1.96429	7.30301	1.57323	2.75225	12.6651	1.4126
7.53976	7.69864	2.36912	0.655734	1.89733	1.5801	1.12948	2.06471	4.80846	9.36637	5.16131	0.58615	1.37597	1.55013	2.63458	1.00464	3.48606	3.23521	10.801	1.96703	7.3102	1.57567	2.7591	12.6192	1.41445
7.54643	7.68802	2.3714	0.656064	1.89846	1.58153	1.13133	2.06518	4.81603	9.37607	5.16204	0.587413	1.37842	1.55112	2.64147	1.00578	3.49654	3.23351	10.8187	1.96979	7.31716	1.57824	2.76602	12.5702	1.41631
7.5531	7.67708	2.37365	0.656411	1.89959	1.58301	1.1331	2.06554	4.82383	9.38554	5.16224	0.588676	1.38081	1.5521	2.6485	1.00693	3.50697	3.23161	10.8356	1.97257	7.32389	1.58094	2.773	12.5182	1.41818
7.55976	7.66585	2.37586	0.656777	1.90072	1.58453	1.13481	2.0658	4.83182	9.39474	5.16195	0.589934	1.38314	1.55307	2.65567	1.00809	3.51735	3.22952	10.8517	1.97537	7.33039	1.58377	2.78006	12.4632	1.42006
7.56643	7.65436	2.37804	0.657171	1.90185	1.5861	1.13645	2.06596	4.84002	9.40366	5.16116	0.591183	1.38541	1.55403	2.66299	1.00926	3.52769	3.22725	10.867	1.97818	7.33663	1.58672	2.78718	12.4051	1.42195
7.5731	7.64263	2.38018	0.657597	1.90299	1.58771	1.13803	2.06602	4.84842	9.41228	5.1599	0.592421	1.38761	1.55497	2.67045	1.01044	3.53799	3.22485	10.8816	1.981	7.34264	1.58979	2.79437	12.3442	1.42385
7.57976	7.63069	2.3823	0.658061	1.90413	1.58937	1.13956	2.06598	4.85701	9.42059	5.15819	0.593646	1.38975	1.55589	2.67806	1.01163	3.54825	3.22231	10.8954	1.98382	7.34841	1.59298	2.80164	12.2805	1.42575
7.58643	7.61856	2.38438	0.658563	1.90529	1.59107	1.14102	2.06585	4.86578	9.42856	5.15605	0.594854	1.39182	1.55679	2.68581	1.01283	3.55847	3.21966	10.9085	1.98663	7.35392	1.59628	2.80898	12.2139	1.42766
7.5931	7.60628	2.38643	0.659113	1.90647	1.5928	1.14243	2.06561	4.87475	9.43619	5.15349	0.596043	1.39382	1.55768	2.6937	1.01404	3.56867	3.21693	10.9209	1.98943	7.35919	1.59967	2.81639	12.1446	1.42957
7.59976	7.59388	2.38845	0.659713	1.90767	1.59458	1.14379	2.06529	4.88391	9.44346	5.15055	0.597209	1.39576	1.55854	2.70174	1.01525	3.57885	3.21411	10.9325	1.99222	7.36422	1.60317	2.82387	12.0728	1.43148
7.60643	7.58142	2.39044	0.660366	1.90889	1.59639	1.14509	2.06489	4.89325	9.45037	5.14724	0.598352	1.39762	1.55938	2.70991	1.01647	3.58901	3.21124	10.9435	1.99499	7.36902	1.60675	2.83142	11.9984	1.43338
7.6131	7.56892	2.39241	0.661077	1.91014	1.59824	1.14635	2.0644	4.90278	9.4569	5.14359	0.599468	1.39942	1.5602	2.71822	1.01769	3.59915	3.20832	10.9537	1.99772	7.37357	1.61042	2.83904	11.9216	1.43529
7.61976	7.55643	2.39434	0.661848	1.91142	1.60011	1.14757	2.06383	4.91249	9.46307	5.13961	0.600555	1.40115	1.56099	2.72665	1.01891	3.60929	3.20538	10.9633	2.00042	7.37789	1.61417	2.84673	11.8426	1.43719
7.62643	7.54398	2.39625	0.662684	1.91273	1.60202	1.14873	2.06318	4.92239	9.46885	5.13535	0.601611	1.40282	1.56176	2.73521	1.02014	3.61942	3.20242	10.9722	2.00308	7.38197	1.61798	2.85449	11.7614	1.43908
7.6331	7.53164	2.39812	0.663585	1.91408	1.60394	1.14986	2.06247	4.93248	9.47424	5.13082	0.602634	1.40441	1.5625	2.74389	1.02137	3.62957	3.19946	10.9804	2.00569	7.38584	1.62185	2.86232	11.6782	1.44096
7.63976	7.51945	2.39998	0.664555	1.91546	1.6059	1.15095	2.0617	4.94276	9.47927	5.12605	0.603623	1.40595	1.56321	2.75269	1.02259	3.63972	3.19652	10.988	2.00824	7.38948	1.62578	2.87022	11.5931	1.44284
7.64643	7.50745	2.4018	0.665594	1.91689	1.60787	1.15201	2.06088	4.95323	9.48391	5.12107	0.604575	1.40741	1.56389	2.76159	1.02381	3.6499	3.1936	10.9949	2.01073	7.3929	1.62975	2.87818	11.5062	1.4447
7.6531	7.4957	2.40361	0.666705	1.91836	1.60986	1.15303	2.06	4.96389	9.48817	5.11589	0.605489	1.40882	1.56455	2.7706	1.02503	3.6601	3.19072	11.0013	2.01316	7.39612	1.63377	2.8862	11.4177	1.44655
7.65976	7.48425	2.40538	0.667889	1.91987	1.61187	1.15402	2.05908	4.97474	9.49209	5.11056	0.606365	1.41017	1.56518	2.7797	1.02624	3.67033	3.18788	11.007	2.01552	7.39914	1.63781	2.89429	11.3278	1.44838
7.66643	7.47315	2.40713	0.669147	1.92144	1.61389	1.15499	2.05811	4.98579	9.49564	5.10508	0.607202	1.41146	1.56579	2.78889	1.02744	3.68061	3.1851	11.0121	2.0178	7.40196	1.64188	2.90244	11.2365	1.45019
7.6731	7.46244	2.40886	0.670479	1.92305	1.61592	1.15592	2.05712	4.99704	9.49887	5.0995	0.607997	1.4127	1.56636	2.79816	1.02863	3.69094	3.18239	11.0166	2.02	7.40458	1.64596	2.91065	11.1441	1.45199
7.67976	7.45219	2.41057	0.671882	1.9247	1.61797	1.15683	2.0561	5.00849	9.50176	5.09383	0.608751	1.41388	1.56691	2.8075	1.02982	3.70132	3.17975	11.0205	2.02211	7.40702	1.65005	2.91892	11.0507	1.45377
7.68643	7.44243	2.41225	0.673361	1.92642	1.62003	1.15771	2.05506	5.02013	9.50435	5.08809	0.609463	1.41502	1.56744	2.81691	1.03099	3.71176	3.17719	11.0239	2.02413	7.40929	1.65414	2.92725	10.9564	1.45552
7.6931	7.43323	2.41391	0.674912	1.92818	1.6221	1.15858	2.05401	5.03198	9.50664	5.08232	0.610133	1.4161	1.56793	2.82637	1.03215	3.72228	3.17473	11.0268	2.02606	7.41139	1.65822	2.93563	10.8615	1.45725
7.69976	7.42464	2.41555	0.676533	1.92999	1.62419	1.15942	2.05295	5.04403	9.50866	5.07653	0.61076	1.41714	1.5684	2.83588	1.03329	3.73288	3.17236	11.0291	2.0279	7.41333	1.66229	2.94407	10.766	1.45896
7.70643	7.41669	2.41717	0.678225	1.93185	1.62629	1.16024	2.05189	5.05629	9.51042	5.07075	0.611345	1.41815	1.56884	2.84543	1.03442	3.74356	3.17009	11.0309	2.02963	7.4151	1.66634	2.95255	10.6702	1.46064
7.7131	7.40944	2.41877	0.679985	1.93377	1.62842	1.16105	2.05083	5.06874	9.51196	5.06499	0.611888	1.41911	1.56926	2.85502	1.03553	3.75435	3.16793	11.0322	2.03127	7.41673	1.67036	2.9611	10.5742	1.46229
7.71977	7.40293	2.42035	0.681811	1.93575	1.63056	1.16183	2.04978	5.08141	9.51327	5.05929	0.612389	1.42003	1.56965	2.86463	1.03662	3.76524	3.16588	11.033	2.0328	7.41822	1.67434	2.96969	10.4781	1.46392
7.72643	7.39721	2.42192	0.683703	1.93778	1.63273	1.1626	2.04875	5.09427	9.51441	5.05365	0.612849	1.42092	1.57001	2.87427	1.03769	3.77623	3.16395	11.0333	2.03424	7.41956	1.67829	2.97834	10.3821	1.46553
7.7331	7.39233	2.42347	0.685654	1.93986	1.63494	1.16335	2.04773	5.10735	9.51538	5.0481	0.613268	1.42179	1.57035	2.88391	1.03873	3.78736	3.16213	11.0332	2.03557	7.42078	1.68219	2.98703	10.2863	1.4671
7.73977	7.38831	2.425	0.687664	1.942	1.63719	1.16408	2.04674	5.12062	9.51621	5.04265	0.613646	1.42262	1.57067	2.89356	1.03975	3.79861	3.16043	11.0326	2.0368	7.42186	1.68603	2.99577	10.191	1.46865
7.74643	7.38521	2.42652	0.68973	1.9442	1.63948	1.16479	2.04577	5.1341	9.51692	5.03733	0.613987	1.42343	1.57096	2.9032	1.04075	3.81	3.15886	11.0316	2.03793	7.42282	1.68982	3.00456	10.0962	1.47017
7.7531	7.38305	2.42802	0.691851	1.94645	1.64184	1.16549	2.04484	5.14779	9.51755	5.03215	0.614289	1.42422	1.57123	2.91284	1.04172	3.82154	3.15741	11.0302	2.03896	7.42367	1.69353	3.0134	10.002	1.47166
7.75977	7.38187	2.42952	0.694017	1.94877	1.64426	1.16616	2.04394	5.16167	9.51811	5.02711	0.614555	1.42499	1.57147	2.92247	1.04267	3.83324	3.15608	11.0284	2.0399	7.42441	1.69718	3.02228	9.90864	1.47312
7.76643	7.3817	2.431	0.696231	1.95115	1.64677	1.16681	2.04307	5.17575	9.51862	5.02224	0.614785	1.42574	1.57169	2.93208	1.04358	3.84511	3.15488	11.0262	2.04074	7.42504	1.70075	3.03121	9.81621	1.47456
7.7731	7.38256	2.43248	0.698487	1.95359	1.64937	1.16744	2.04225	5.19004	9.51912	5.01755	0.614981	1.42647	1.57189	2.94166	1.04447	3.85715	3.1538	11.0236	2.0415	7.42557	1.70424	3.04019	9.72482	1.47597
7.77977	7.38448	2.43395	0.700779	1.95609	1.65207	1.16805	2.04146	5.20451	9.51961	5.01304	0.615144	1.4272	1.57206	2.95122	1.04533	3.86938	3.15285	11.0207	2.04217	7.426	1.70763	3.04921	9.63456	1.47736
7.78643	7.38748	2.43541	0.703106	1.95867	1.6549	1.16863	2.04072	5.21918	9.52015	5.00874	0.615277	1.42792	1.57221	2.96075	1.04615	3.88181	3.15202	11.0174	2.04276	7.42634	1.71094	3.05828	9.54556	1.47872
7.7931	7.39159	2.43687	0.705461	1.96131	1.65786	1.16919	2.04002	5.23404	9.52073	5.00464	0.61538	1.42863	1.57235	2.97024	1.04694	3.89445	3.15131	11.0137	2.04328	7.42659	1.71415	3.0674	9.45792	1.48006
7.79977	7.3968	2.43832	0.707842	1.96403	1.66098	1.16972	2.03937	5.24909	9.52138	5.00076	0.615456	1.42933	1.57245	2.97969	1.0477	3.90731	3.15072	11.0098	2.04372	7.42675	1.71725	3.07655	9.37172	1.48137
7.80643	7.40313	2.43978	0.710248	1.96682	1.66427	1.17022	2.03876	5.26432	9.52214	4.9971	0.615505	1.43003	1.57254	2.98911	1.04843	3.92039	3.15025	11.0055	2.0441	7.42684	1.72025	3.08576	9.28702	1.48267
7.8131	7.41058	2.44123	0.712667	1.96969	1.66774	1.17069	2.03819	5.27972	9.52301	4.99367	0.615531	1.43073	1.57261	2.99848	1.04912	3.93372	3.14989	11.0009	2.04443	7.42685	1.72313	3.09501	9.20394	1.48394
7.81977	7.41916	2.44268	0.7151	1.97264	1.67143	1.17112	2.03767	5.29531	9.52402	4.99048	0.615533	1.43143	1.57265	3.0078	1.04978	3.9473	3.14965	10.996	2.0447	7.42678	1.72589	3.1043	9.12251	1.4852
7.82643	7.42887	2.44414	0.717544	1.97568	1.67533	1.17153	2.03719	5.31107	9.52519	4.98752	0.615516	1.43213	1.57268	3.01708	1.0504	3.96114	3.14951	10.9908	2.04493	7.42665	1.72854	3.11363	9.04278	1.48644
7.8331	7.4397	2.4456	0.71999	1.97881	1.67948	1.1719	2.03675	5.32699	9.52654	4.98481	0.61548	1.43284	1.57269	3.02632	1.05099	3.97526	3.14949	10.9853	2.04513	7.42646	1.73106	3.12301	8.96485	1.48766
7.83977	7.45164	2.44707	0.72244	1.98203	1.68388	1.17223	2.03634	5.34308	9.52809	4.98234	0.615427	1.43355	1.57268	3.0355	1.05154	3.98967	3.14956	10.9796	2.04529	7.42621	1.73344	3.13243	8.88871	1.48887
7.84643	7.46467	2.44854	0.724884	1.98534	1.68857	1.17253	2.03598	5.35933	9.52984	4.98011	0.615358	1.43426	1.57265	3.04464	1.05206	4.00437	3.14974	10.9735	2.04543	7.42592	1.7357	3.1419	8.81443	1.49006
7.8531	7.47878	2.45002	0.727321	1.98875	1.69354	1.17279	2.03565	5.37574	9.53185	4.97813	0.615276	1.43499	1.5726	3.05373	1.05255	4.01938	3.15001	10.9672	2.04555	7.42558	1.73782	3.15141	8.74204	1.49125
7.85977	7.49395	2.4515	0.72975	1.99226	1.69883	1.17301	2.03535	5.39229	9.5341	4.9764	0.615182	1.43571	1.57253	3.06277	1.053	4.03471	3.15038	10.9606	2.04566	7.4252	1.7398	3.16095	8.67154	1.49243
7.86643	7.51014	2.453	0.732163	1.99588	1.70445	1.1732	2.03509	5.40899	9.53662	4.97491	0.615079	1.43645	1.57245	3.07177	1.05342	4.05037	3.15083	10.9537	2.04578	7.42478	1.74163	3.17054	8.60298	1.49359
7.8731	7.52733	2.4545	0.734561	1.9996	1.71041	1.17334	2.03484	5.42584	9.53942	4.97368	0.614967	1.4372	1.57235	3.08071	1.05381	4.06638	3.15137	10.9465	2.0459	7.42436	1.74332	3.18017	8.53633	1.49475
7.87977	7.54549	2.45601	0.736937	2.00342	1.71672	1.17345	2.03462	5.44283	9.54254	4.97268	0.614849	1.43795	1.57224	3.08961	1.05416	4.08274	3.15199	10.9391	2.04603	7.42392	1.74486	3.18984	8.47163	1.4959
7.88643	7.56456	2.45753	0.739287	2.00736	1.72341	1.17352	2.03442	5.45994	9.54596	4.97193	0.614725	1.43872	1.57211	3.09845	1.05448	4.09946	3.1527	10.9313	2.04617	7.42347	1.74624	3.19954	8.40888	1.49705
7.8931	7.58453	2.45906	0.741613	2.0114	1.73047	1.17356	2.03424	5.47719	9.54972	4.97143	0.614597	1.43949	1.57197	3.10725	1.05478	4.11655	3.15347	10.9232	2.04635	7.42303	1.74747	3.20928	8.34807	1.49819
7.89977	7.60533	2.4606	0.74391	2.01556	1.73793	1.17356	2.03406	5.49456	9.55382	4.97117	0.614467	1.44027	1.57181	3.11601	1.05505	4.13403	3.15431	10.9149	2.04655	7.42261	1.74855	3.21906	8.28918	1.49934
7.90643	7.62692	2.46215	0.746174	2.01982	1.74579	1.17352	2.0339	5.51205	9.55829	4.97114	0.614336	1.44106	1.57165	3.12471	1.05528	4.15189	3.15522	10.9062	2.04679	7.42223	1.74947	3.22887	8.23223	1.50048
7.9131	7.64926	2.4637	0.748403	2.0242	1.75406	1.17345	2.03374	5.52966	9.56313	4.97136	0.614204	1.44187	1.57147	3.13337	1.0555	4.17016	3.15619	10.8971	2.04708	7.4219	1.75023	3.23871	8.17718	1.50162
7.91977	7.67228	2.46526	0.7506	2.02869	1.76275	1.17335	2.03358	5.54738	9.56836	4.97181	0.614074	1.44268	1.57129	3.14198	1.05569	4.18883	3.15723	10.8877	2.04741	7.42162	1.75083	3.24858	8.12402	1.50276
7.92643	7.69594	2.46683	0.752757	2.03328	1.77185	1.17322	2.03342	5.56521	9.57399	4.9725	0.613945	1.44351	1.5711	3.15055	1.05586	4.20791	3.15832	10.8779	2.04779	7.42142	1.75127	3.25849	8.07273	1.5039
7.9331	7.72015	2.4684	0.754874	2.03799	1.78138	1.17307	2.03325	5.58314	9.58002	4.97343	0.613819	1.44434	1.57089	3.15907	1.05601	4.22741	3.15946	10.8678	2.04822	7.42131	1.75154	3.26842	8.02329	1.50505
7.93977	7.74488	2.46997	0.756952	2.0428	1.79134	1.17288	2.03308	5.60117	9.58648	4.97459	0.613697	1.44519	1.57069	3.16754	1.05613	4.24732	3.16064	10.8572	2.04872	7.42131	1.75166	3.27839	7.97567	1.5062
7.94643	7.77006	2.47155	0.758986	2.04772	1.80172	1.17268	2.03289	5.61929	9.59335	4.97599	0.613578	1.44604	1.57048	3.17596	1.05625	4.26767	3.16188	10.8463	2.04927	7.42144	1.75161	3.28838	7.92986	1.50735
7.9531	7.79562	2.47312	0.760977	2.05275	1.81253	1.17246	2.03268	5.63751	9.60067	4.97762	0.613464	1.44691	1.57027	3.18434	1.05635	4.28843	3.16315	10.8348	2.04989	7.42173	1.75141	3.2984	7.88583	1.50851
7.95977	7.8215	2.4747	0.762927	2.05788	1.82377	1.17221	2.03246	5.65582	9.60843	4.97949	0.613354	1.44779	1.57005	3.19267	1.05643	4.30963	3.16447	10.823	2.05058	7.42218	1.75104	3.30844	7.84354	1.50968
7.96643	7.84763	2.47627	0.764833	2.06311	1.83543	1.17196	2.03222	5.67421	9.61664	4.9816	0.61325	1.44868	1.56984	3.20095	1.05651	4.33125	3.16582	10.8106	2.05133	7.42282	1.75051	3.31851	7.80298	1.51086
7.9731	7.87394	2.47784	0.766692	2.06845	1.84752	1.17169	2.03196	5.69268	9.6253	4.98396	0.61315	1.44958	1.56962	3.20917	1.05658	4.35329	3.16721	10.7977	2.05215	7.42367	1.74983	3.32861	7.76412	1.51204
7.97977	7.90037	2.47939	0.768507	2.07388	1.86002	1.17141	2.03167	5.71122	9.63442	4.98655	0.613056	1.4505	1.56942	3.21735	1.05665	4.37575	3.16863	10.7844	2.05304	7.42476	1.74898	3.33874	7.72693	1.51323
7.98643	7.92684	2.48094	0.770277	2.07942	1.87294	1.17113	2.03136	5.72984	9.64399	4.98939	0.612966	1.45142	1.56921	3.22548	1.05671	4.39863	3.17008	10.7705	2.054	7.42611	1.74799	3.34889	7.69138	1.51444
7.9931	7.9533	2.48248	0.772004	2.08506	1.88628	1.17085	2.03102	5.74852	9.65402	4.99249	0.612881	1.45237	1.56901	3.23354	1.05678	4.42191	3.17155	10.756	2.05503	7.42774	1.74684	3.35908	7.65747	1.51565
7.99977	7.97967	2.484	0.773684	2.09081	1.90003	1.17057	2.03065	5.76727	9.66449	4.99583	0.6128	1.45332	1.56883	3.24156	1.05684	4.4456	3.17305	10.741	2.05612	7.42967	1.74554	3.36929	7.62515	1.51688
8.00643	8.00589	2.48551	0.775321	2.09666	1.91418	1.17029	2.03026	5.78608	9.67541	4.99944	0.612722	1.4543	1.56865	3.24952	1.05691	4.46967	3.17458	10.7253	2.05728	7.43194	1.7441	3.37954	7.59442	1.51812
8.0131	8.0319	2.487	0.776917	2.10263	1.92875	1.17002	2.02983	5.80494	9.68678	5.00331	0.612648	1.45528	1.56848	3.25742	1.05699	4.49413	3.17612	10.7091	2.05851	7.43456	1.74252	3.38982	7.56524	1.51937
8.01977	8.05763	2.48846	0.778466	2.10871	1.94372	1.16977	2.02937	5.82386	9.69859	5.00744	0.612575	1.45629	1.56832	3.26526	1.05707	4.51895	3.17768	10.6923	2.05979	7.43756	1.74079	3.40014	7.53762	1.52063
8.02643	8.08301	2.48991	0.779975	2.11491	1.95912	1.16952	2.02889	5.84283	9.71081	5.01186	0.612504	1.45732	1.56818	3.27303	1.05717	4.54413	3.17926	10.6749	2.06113	7.44096	1.73893	3.4105	7.51152	1.52191
8.0331	8.10801	2.49132	0.781441	2.12125	1.97493	1.1693	2.02838	5.86184	9.72344	5.01655	0.612433	1.45837	1.56806	3.28074	1.05728	4.56964	3.18085	10.6568	2.06253	7.4448	1.73694	3.4209	7.48693	1.52321
8.03977	8.13255	2.49271	0.782866	2.12772	1.99117	1.1691	2.02784	5.88089	9.73646	5.02152	0.612362	1.45944	1.56796	3.28839	1.05741	4.59548	3.18246	10.6381	2.06399	7.44909	1.73482	3.43136	7.46386	1.52451
8.04643	8.15657	2.49407	0.78425	2.13434	2.00784	1.16892	2.02727	5.89997	9.74987	5.02679	0.612288	1.46054	1.56787	3.29597	1.05756	4.62163	3.18408	10.6188	2.06549	7.45386	1.73258	3.44186	7.44226	1.52584
8.0531	8.18004	2.49539	0.785594	2.14113	2.02497	1.16877	2.02668	5.91909	9.76364	5.03236	0.612213	1.46167	1.56781	3.30348	1.05773	4.64807	3.18571	10.5989	2.06704	7.45912	1.73022	3.45242	7.42216	1.52718
8.05977	8.2029	2.49668	0.786899	2.14809	2.04257	1.16864	2.02606	5.93823	9.77775	5.03823	0.612132	1.46282	1.56776	3.31092	1.05792	4.67478	3.18736	10.5784	2.06864	7.46491	1.72775	3.46304	7.40353	1.52853
8.06643	8.2251	2.49793	0.788167	2.15526	2.06066	1.16856	2.02543	5.95738	9.79217	5.04441	0.612047	1.464	1.56775	3.31828	1.05813	4.70175	3.18901	10.5574	2.07027	7.47125	1.72517	3.47373	7.38636	1.5299
8.0731	8.24661	2.49914	0.789397	2.16263	2.07927	1.16851	2.02477	5.97656	9.80689	5.0509	0.611955	1.46522	1.56775	3.32558	1.05837	4.72896	3.19066	10.5357	2.07194	7.47814	1.72249	3.48449	7.37066	1.53128
8.07977	8.26737	2.50032	0.790594	2.17024	2.09842	1.1685	2.02409	5.99574	9.82189	5.05772	0.611854	1.46647	1.56779	3.3328	1.05864	4.75639	3.19232	10.5135	2.07364	7.48562	1.71971	3.49532	7.35641	1.53269
8.08643	8.28736	2.50145	0.791751	2.17811	2.11816	1.16853	2.0234	6.01493	9.83711	5.06486	0.611744	1.46776	1.56785	3.33994	1.05894	4.78403	3.19399	10.4908	2.07536	7.49371	1.71684	3.50624	7.34362	1.5341
8.0931	8.30655	2.50254	0.792875	2.18627	2.13853	1.16861	2.02269	6.0341	9.85256	5.07234	0.611624	1.46909	1.56794	3.34702	1.05927	4.81187	3.19566	10.4675	2.07711	7.50241	1.71388	3.51723	7.33227	1.53553
8.09977	8.32489	2.50358	0.793965	2.19473	2.15956	1.16873	2.02197	6.05328	9.86818	5.08016	0.611491	1.47046	1.56806	3.35401	1.05964	4.83989	3.19733	10.4439	2.07888	7.51174	1.71085	3.52832	7.32235	1.53698
8.10643	8.34237	2.50458	0.795023	2.20353	2.18131	1.16891	2.02124	6.07243	9.88396	5.08831	0.611346	1.47188	1.56821	3.36093	1.06003	4.86808	3.199	10.4198	2.08066	7.52173	1.70774	3.53949	7.31387	1.53844
8.1131	8.35896	2.50553	0.796047	2.21271	2.20383	1.16913	2.02051	6.09156	9.89985	5.09682	0.611184	1.47334	1.56839	3.36778	1.06047	4.89643	3.20067	10.3953	2.08245	7.53238	1.70457	3.55077	7.30682	1.53991
8.11977	8.37465	2.50643	0.797041	2.22228	2.22719	1.16942	2.01976	6.11066	9.91583	5.10567	0.611007	1.47485	1.56861	3.37455	1.06094	4.92494	3.20233	10.3705	2.08425	7.54369	1.70134	3.56214	7.30118	1.5414
8.12643	8.3894	2.50729	0.798002	2.23229	2.25146	1.16976	2.01902	6.12972	9.93186	5.11488	0.610813	1.47641	1.56886	3.38126	1.06144	4.9536	3.20399	10.3454	2.08605	7.55569	1.69805	3.57361	7.29694	1.5429
8.1331	8.40322	2.5081	0.798936	2.24277	2.2767	1.17016	2.01827	6.14874	9.94791	5.12445	0.610601	1.47802	1.56913	3.38789	1.06198	4.98241	3.20565	10.3202	2.08785	7.56837	1.69472	3.58519	7.29409	1.54441
8.13977	8.41609	2.50886	0.799838	2.25375	2.30299	1.17062	2.01752	6.16769	9.96394	5.13438	0.610368	1.47969	1.56945	3.39445	1.06256	5.01138	3.20729	10.2947	2.08964	7.58175	1.69134	3.59688	7.29262	1.54593
8.14643	8.428	2.50958	0.800711	2.26528	2.33041	1.17115	2.01677	6.18658	9.97992	5.14468	0.610114	1.48142	1.5698	3.40096	1.06318	5.0405	3.20893	10.2691	2.09143	7.59582	1.68793	3.60867	7.2925	1.54746
8.1531	8.43894	2.51025	0.801558	2.27738	2.35905	1.17174	2.01602	6.2054	9.9958	5.15534	0.60984	1.4832	1.57018	3.4074	1.06384	5.06979	3.21055	10.2435	2.0932	7.61058	1.68449	3.62058	7.29371	1.549
8.15977	8.44891	2.51088	0.802373	2.2901	2.38899	1.17239	2.01529	6.22413	10.0115	5.16637	0.609542	1.48504	1.5706	3.41378	1.06453	5.09925	3.21216	10.2178	2.09496	7.62603	1.68103	3.6326	7.29624	1.55056
8.16643	8.45791	2.51146	0.803165	2.30347	2.42033	1.17312	2.01456	6.24277	10.0271	5.17778	0.609221	1.48695	1.57105	3.42011	1.06527	5.1289	3.21375	10.1923	2.0967	7.64218	1.67756	3.64472	7.30004	1.55212
8.1731	8.46596	2.51199	0.803928	2.31753	2.45317	1.17392	2.01384	6.2613	10.0425	5.18955	0.608876	1.48892	1.57153	3.4264	1.06604	5.15875	3.21531	10.1668	2.09842	7.659	1.67407	3.65696	7.3051	1.55368
8.17977	8.47303	2.51249	0.804665	2.33231	2.48759	1.17479	2.01314	6.27972	10.0577	5.2017	0.608506	1.49095	1.57205	3.43264	1.06685	5.18881	3.21686	10.1416	2.10012	7.6765	1.67058	3.66931	7.31138	1.55526
8.18643	8.47914	2.51294	0.805377	2.34784	2.5237	1.17573	2.01245	6.29801	10.0726	5.21422	0.608111	1.49305	1.57261	3.43884	1.06769	5.21911	3.21837	10.1166	2.10179	7.69467	1.66709	3.68177	7.31883	1.55684
8.1931	8.48431	2.51335	0.806065	2.36416	2.5616	1.17674	2.01178	6.31617	10.0872	5.22711	0.60769	1.49521	1.57319	3.44502	1.06857	5.24967	3.21986	10.0919	2.10343	7.71348	1.66361	3.69433	7.32743	1.55843
8.19977	8.48853	2.51372	0.806727	2.38129	2.60137	1.17783	2.01112	6.33418	10.1014	5.24037	0.607243	1.49744	1.57381	3.45117	1.06949	5.2805	3.2213	10.0676	2.10505	7.73293	1.66014	3.70701	7.33713	1.56002
8.20643	8.49182	2.51406	0.807364	2.39926	2.64313	1.179	2.01049	6.35204	10.1153	5.254	0.606769	1.49974	1.57446	3.4573	1.07044	5.31164	3.22271	10.0437	2.10662	7.75299	1.65669	3.71979	7.34789	1.56161
8.2131	8.49418	2.51436	0.807977	2.41809	2.68695	1.18024	2.00989	6.36972	10.1288	5.268	0.60627	1.50211	1.57514	3.46342	1.07143	5.34308	3.22408	10.0203	2.10817	7.77365	1.65327	3.73268	7.35965	1.56321
8.21977	8.49564	2.51463	0.80857	2.4378	2.73293	1.18156	2.00931	6.38722	10.1419	5.28237	0.605743	1.50454	1.57586	3.46954	1.07245	5.37488	3.2254	9.99749	2.10968	7.79489	1.64987	3.74566	7.37236	1.56481
8.22643	8.49621	2.51486	0.80914	2.45841	2.78115	1.18296	2.00875	6.40453	10.1545	5.2971	0.605192	1.50704	1.5766	3.47566	1.0735	5.40703	3.22666	9.97523	2.11115	7.81667	1.64651	3.75875	7.38598	1.56642
8.2331	8.49589	2.51507	0.809685	2.47991	2.83169	1.18444	2.00823	6.42164	10.1666	5.31219	0.604614	1.5096	1.57737	3.48179	1.07457	5.43957	3.22786	9.95361	2.11259	7.83898	1.64319	3.77194	7.40043	1.56802
8.23977	8.4947	2.51525	0.81021	2.50233	2.88462	1.186	2.00774	6.43853	10.1783	5.32763	0.604011	1.51224	1.57817	3.48795	1.07568	5.47252	3.229	9.93268	2.11399	7.86178	1.6399	3.78522	7.41568	1.56963
8.24643	8.49267	2.5154	0.810715	2.52566	2.93999	1.18764	2.00729	6.4552	10.1894	5.34343	0.603382	1.51493	1.579	3.49413	1.07681	5.50589	3.23008	9.91247	2.11535	7.88504	1.63667	3.79859	7.43166	1.57124
8.2531	8.48981	2.51553	0.811199	2.54988	2.99785	1.18936	2.00687	6.47164	10.2	5.35957	0.60273	1.51769	1.57986	3.50035	1.07797	5.53969	3.23107	9.89301	2.11667	7.90873	1.63349	3.81205	7.4483	1.57286
8.25977	8.48613	2.51563	0.811665	2.575	3.05825	1.19116	2.00648	6.48782	10.21	5.37605	0.602053	1.52052	1.58074	3.50661	1.07915	5.57396	3.23198	9.87436	2.11795	7.93282	1.63036	3.82559	7.46555	1.57447
8.26643	8.48166	2.51572	0.812109	2.60099	3.12121	1.19304	2.00613	6.50375	10.2194	5.39286	0.601353	1.5234	1.58164	3.51291	1.08036	5.6087	3.23281	9.85652	2.1192	7.95725	1.62729	3.83922	7.48333	1.57608
8.2731	8.47641	2.51578	0.812537	2.62783	3.18675	1.19501	2.00583	6.51941	10.2283	5.40999	0.600631	1.52635	1.58257	3.51928	1.08158	5.64392	3.23353	9.83954	2.1204	7.98201	1.62428	3.85293	7.5016	1.57769
8.27977	8.47041	2.51582	0.812947	2.65549	3.25485	1.19706	2.00556	6.5348	10.2365	5.42744	0.599887	1.52935	1.58353	3.52572	1.08282	5.67964	3.23416	9.82343	2.12157	8.00704	1.62134	3.86672	7.52027	1.57931
8.28643	8.46367	2.51585	0.81334	2.68395	3.3255	1.19918	2.00533	6.5499	10.2442	5.44519	0.599124	1.53241	1.5845	3.53222	1.08407	5.71586	3.23468	9.8082	2.1227	8.0323	1.61846	3.88058	7.53928	1.58093
8.2931	8.45622	2.51587	0.813718	2.71315	3.39868	1.20139	2.00514	6.56472	10.2512	5.46324	0.59834	1.53552	1.58549	3.5388	1.08534	5.75259	3.23508	9.79388	2.1238	8.05775	1.61565	3.8945	7.55857	1.58254
8.29977	8.44807	2.51587	0.814081	2.74306	3.47434	1.20369	2.00499	6.57922	10.2576	5.48157	0.597539	1.53869	1.5865	3.54546	1.08663	5.78984	3.23535	9.78048	2.12486	8.08334	1.61292	3.9085	7.57807	1.58415
8.30644	8.43924	2.51585	0.814431	2.77362	3.5524	1.20607	2.00488	6.59342	10.2634	5.50017	0.596719	1.5419	1.58753	3.5522	1.08792	5.82761	3.2355	9.768	2.12588	8.10904	1.61027	3.92256	7.59771	1.58577
8.3131	8.42978	2.51583	0.814769	2.80478	3.63278	1.20852	2.0048	6.60731	10.2687	5.51903	0.595884	1.54516	1.58858	3.55904	1.08922	5.8659	3.2355	9.75645	2.12688	8.13478	1.60768	3.93668	7.61742	1.58738
8.31977	8.41969	2.51579	0.815093	2.83648	3.71539	1.21107	2.00477	6.62086	10.2733	5.53814	0.595034	1.54846	1.58964	3.56598	1.09053	5.9047	3.23536	9.74582	2.12784	8.16052	1.60518	3.95085	7.63715	1.589
8.32644	8.409	2.51575	0.815408	2.86867	3.80011	1.21369	2.00477	6.63409	10.2773	5.55747	0.59417	1.5518	1.59071	3.57301	1.09184	5.94403	3.23506	9.73612	2.12877	8.18622	1.60276	3.96508	7.6568	1.59061
8.3331	8.39773	2.51569	0.815713	2.90126	3.88681	1.21641	2.00481	6.64698	10.2807	5.57702	0.593293	1.55517	1.5918	3.58013	1.09315	5.98387	3.2346	9.72736	2.12968	8.21182	1.60043	3.97937	7.67633	1.59222
8.33977	8.38592	2.51562	0.816009	2.93419	3.97534	1.2192	2.00488	6.65954	10.2835	5.59677	0.592406	1.55858	1.5929	3.58736	1.09446	6.02421	3.23397	9.7195	2.13056	8.23727	1.59817	3.9937	7.69566	1.59384
8.34644	8.37357	2.51555	0.8163	2.9674	4.06553	1.22208	2.00498	6.67174	10.2858	5.61671	0.591507	1.56202	1.59401	3.59469	1.09578	6.06506	3.23316	9.71257	2.13142	8.26253	1.596	4.00808	7.71474	1.59545
8.3531	8.36073	2.51547	0.816582	3.00079	4.15719	1.22505	2.00512	6.68361	10.2876	5.6368	0.590601	1.56548	1.59513	3.60211	1.09709	6.1064	3.23216	9.70651	2.13225	8.28753	1.59392	4.02251	7.73349	1.59706
8.35977	8.34742	2.51538	0.816861	3.03431	4.25016	1.2281	2.00529	6.69512	10.2888	5.65705	0.589687	1.56897	1.59626	3.60963	1.09839	6.14823	3.23097	9.70136	2.13307	8.31224	1.59192	4.03698	7.75186	1.59867
8.36644	8.33367	2.51529	0.817138	3.06786	4.34419	1.23124	2.00548	6.70628	10.2896	5.67743	0.588766	1.57248	1.5974	3.61725	1.0997	6.19053	3.22958	9.69708	2.13387	8.3366	1.59001	4.0515	7.76976	1.60028
8.3731	8.31951	2.51519	0.817411	3.10137	4.4391	1.23447	2.00571	6.71708	10.2898	5.69792	0.58784	1.576	1.59854	3.62496	1.10099	6.23331	3.22798	9.69366	2.13465	8.36056	1.58819	4.06606	7.78717	1.60189
8.37977	8.30496	2.51508	0.817684	3.13476	4.53462	1.23779	2.00595	6.72754	10.2896	5.71851	0.58691	1.57954	1.59969	3.63275	1.10227	6.27653	3.22616	9.69109	2.13542	8.38408	1.58646	4.08067	7.80399	1.60349
8.38644	8.29005	2.51496	0.817959	3.16796	4.63054	1.24119	2.00622	6.73763	10.289	5.73917	0.585977	1.58308	1.60085	3.64062	1.10355	6.32019	3.22412	9.68934	2.13618	8.40711	1.58482	4.09531	7.82019	1.60509
8.3931	8.27483	2.51484	0.818235	3.20087	4.7266	1.24469	2.00652	6.74738	10.288	5.7599	0.585043	1.58663	1.60201	3.64857	1.10481	6.36429	3.22184	9.6884	2.13694	8.4296	1.58327	4.11001	7.83571	1.60669
8.39977	8.25931	2.51472	0.818517	3.23343	4.82254	1.24828	2.00683	6.75677	10.2867	5.78066	0.584107	1.59018	1.60317	3.65659	1.10606	6.40881	3.21933	9.68826	2.13769	8.4515	1.5818	4.12475	7.85048	1.60828
8.40644	8.24352	2.51458	0.818803	3.26554	4.91809	1.25196	2.00716	6.76581	10.2849	5.80145	0.583172	1.59373	1.60434	3.66466	1.1073	6.45374	3.21657	9.68889	2.13844	8.47278	1.58043	4.13953	7.86446	1.60987
8.4131	8.2275	2.51444	0.819095	3.29715	5.013	1.25574	2.0075	6.77451	10.2829	5.82224	0.582238	1.59728	1.60551	3.67279	1.10852	6.49905	3.21357	9.69028	2.13919	8.49338	1.57915	4.15437	7.8776	1.61146
8.41977	8.21127	2.51429	0.819396	3.32817	5.10698	1.25961	2.00787	6.78286	10.2806	5.84303	0.581306	1.60081	1.60668	3.68096	1.10972	6.54476	3.21031	9.69242	2.13994	8.51327	1.57795	4.16925	7.88984	1.61303
8.42644	8.19488	2.51414	0.819707	3.35853	5.19975	1.26358	2.00824	6.79088	10.2781	5.86378	0.580377	1.60434	1.60786	3.68916	1.11091	6.59084	3.20678	9.69527	2.1407	8.53241	1.57684	4.1842	7.90115	1.6146
8.4331	8.17834	2.51398	0.820029	3.38817	5.29106	1.26766	2.00863	6.79857	10.2753	5.88449	0.579452	1.60785	1.60903	3.69738	1.11209	6.63728	3.20299	9.69884	2.14147	8.55077	1.57583	4.19919	7.91148	1.61616
8.43977	8.16169	2.51381	0.820366	3.417	5.38062	1.27183	2.00903	6.80593	10.2723	5.90513	0.578532	1.61135	1.6102	3.70561	1.11324	6.68407	3.19893	9.70308	2.14226	8.5683	1.5749	4.21425	7.9208	1.61771
8.44644	8.14497	2.51364	0.820713	3.44497	5.46816	1.27611	2.00945	6.81297	10.2692	5.92571	0.577617	1.61483	1.61138	3.71384	1.11438	6.73121	3.19458	9.708	2.14305	8.58498	1.57406	4.22938	7.92906	1.61924
8.4531	8.12819	2.51346	0.82108	3.47202	5.5534	1.2805	2.00987	6.81969	10.266	5.94618	0.576708	1.61829	1.61255	3.72205	1.1155	6.77868	3.18996	9.71358	2.14387	8.60078	1.57331	4.24457	7.93624	1.62077
8.45977	8.1114	2.51327	0.821462	3.49807	5.63608	1.28499	2.01031	6.82612	10.2627	5.96656	0.575806	1.62173	1.61373	3.73024	1.11659	6.82648	3.18505	9.71979	2.1447	8.61566	1.57264	4.25983	7.9423	1.62227
8.46644	8.09462	2.51308	0.821863	3.52308	5.71593	1.2896	2.01075	6.83226	10.2593	5.98682	0.574911	1.62514	1.6149	3.7384	1.11767	6.87459	3.17985	9.72662	2.14556	8.62962	1.57206	4.27517	7.94723	1.62377
8.4731	8.07787	2.51288	0.822282	3.54699	5.79271	1.29432	2.0112	6.83811	10.2559	6.00695	0.574025	1.62853	1.61607	3.7465	1.11874	6.92302	3.17436	9.73406	2.14644	8.64261	1.57157	4.2906	7.95099	1.62524
8.47977	8.0612	2.51267	0.822723	3.56975	5.86616	1.29916	2.01167	6.84367	10.2525	6.02694	0.573146	1.6319	1.61725	3.75455	1.11978	6.97177	3.16857	9.74208	2.14735	8.65461	1.57116	4.30611	7.95359	1.6267
8.48644	8.04462	2.51246	0.823188	3.5913	5.93604	1.30412	2.01214	6.84899	10.2491	6.04677	0.572276	1.63523	1.61842	3.76252	1.1208	7.02081	3.16249	9.75069	2.14829	8.66563	1.57084	4.32171	7.95499	1.62813
8.4931	8.02817	2.51224	0.823677	3.61161	6.00211	1.30921	2.01262	6.85405	10.2458	6.06644	0.571415	1.63854	1.61959	3.7704	1.1218	7.07017	3.1561	9.75985	2.14926	8.67563	1.57061	4.33741	7.95521	1.62954
8.49977	8.01187	2.51202	0.82419	3.63062	6.06416	1.31442	2.01311	6.85887	10.2425	6.08593	0.570564	1.64181	1.62076	3.77819	1.12278	7.11981	3.14941	9.76957	2.15027	8.68461	1.57045	4.35322	7.95422	1.63093
8.50644	7.99574	2.51179	0.824729	3.6483	6.12198	1.31977	2.01361	6.86346	10.2394	6.10525	0.569722	1.64506	1.62193	3.78587	1.12374	7.16977	3.14242	9.77981	2.15131	8.69255	1.57038	4.36913	7.95204	1.63229
8.5131	7.97981	2.51156	0.825298	3.6646	6.17536	1.32525	2.01412	6.86783	10.2364	6.12438	0.56889	1.64828	1.62311	3.79344	1.12469	7.22003	3.13513	9.79057	2.15239	8.69944	1.57039	4.38516	7.94867	1.63362
8.51977	7.96411	2.51133	0.825896	3.67949	6.22411	1.33087	2.01465	6.872	10.2335	6.14331	0.568068	1.65147	1.62428	3.80088	1.12562	7.27059	3.12753	9.80184	2.15351	8.70529	1.57048	4.40131	7.94413	1.63493
8.52644	7.94864	2.51109	0.826523	3.69295	6.26805	1.33664	2.01518	6.87597	10.2308	6.16204	0.567255	1.65463	1.62545	3.80818	1.12653	7.32148	3.11963	9.81361	2.15468	8.71009	1.57066	4.41758	7.93842	1.63621
8.5331	7.93345	2.51085	0.827182	3.70493	6.30705	1.34255	2.01573	6.87977	10.2283	6.18057	0.566453	1.65776	1.62662	3.81534	1.12742	7.37267	3.11143	9.82585	2.15589	8.71384	1.57091	4.43399	7.93157	1.63745
8.53977	7.91855	2.51061	0.827874	3.7154	6.34092	1.34863	2.01629	6.88341	10.226	6.19888	0.565662	1.66087	1.6278	3.82234	1.1283	7.42419	3.10292	9.83855	2.15714	8.71653	1.57124	4.45054	7.9236	1.63866
8.54644	7.90395	2.51037	0.828597	3.72436	6.36955	1.35486	2.01686	6.88689	10.2239	6.21699	0.56488	1.66394	1.62898	3.82919	1.12916	7.47604	3.09412	9.85171	2.15844	8.71817	1.57165	4.46723	7.91453	1.63985
8.5531	7.88967	2.51012	0.829358	3.73176	6.39282	1.36126	2.01745	6.89023	10.2221	6.23488	0.564108	1.66699	1.63016	3.83588	1.13	7.52822	3.08501	9.86531	2.15978	8.71877	1.57214	4.48407	7.90441	1.64099
8.55977	7.87574	2.50988	0.830153	3.73759	6.41062	1.36784	2.01806	6.89344	10.2206	6.25255	0.563347	1.67002	1.63134	3.8424	1.13084	7.58076	3.07561	9.87933	2.16117	8.71835	1.5727	4.50107	7.89325	1.64211
8.56644	7.86216	2.50964	0.830984	3.74183	6.42289	1.3746	2.01867	6.89654	10.2193	6.27001	0.562595	1.67301	1.63253	3.84875	1.13166	7.63366	3.06592	9.89377	2.16261	8.71689	1.57334	4.51824	7.88111	1.64319
8.5731	7.84895	2.50941	0.831852	3.74447	6.42954	1.38155	2.01931	6.89954	10.2183	6.28725	0.561854	1.67598	1.63372	3.85493	1.13247	7.68692	3.05593	9.9086	2.1641	8.71441	1.57406	4.53557	7.86801	1.64423
8.57977	7.83612	2.50918	0.832761	3.74549	6.43051	1.38869	2.01996	6.90245	10.2176	6.30428	0.561122	1.67893	1.63492	3.86094	1.13327	7.74057	3.04565	9.92382	2.16563	8.71094	1.57485	4.55307	7.85401	1.64525
8.58644	7.82367	2.50895	0.833706	3.74487	6.4258	1.39605	2.02064	6.90527	10.2172	6.3211	0.5604	1.68185	1.63612	3.86678	1.13406	7.79461	3.0351	9.93941	2.16721	8.70647	1.57571	4.57076	7.83914	1.64622
8.5931	7.81162	2.50873	0.834693	3.74262	6.41537	1.40361	2.02133	6.90803	10.2171	6.3377	0.559687	1.68476	1.63733	3.87245	1.13484	7.84907	3.02425	9.95535	2.16883	8.70104	1.57664	4.58863	7.82345	1.64717
8.59977	7.79998	2.50852	0.83572	3.73873	6.39925	1.4114	2.02204	6.91073	10.2173	6.3541	0.558984	1.68764	1.63855	3.87795	1.13562	7.90394	3.01314	9.97164	2.1705	8.69464	1.57765	4.60669	7.80699	1.64808
8.60644	7.78875	2.50832	0.836789	3.73318	6.37745	1.41943	2.02276	6.91338	10.2178	6.37031	0.55829	1.6905	1.63978	3.8833	1.13639	7.95925	3.00176	9.98824	2.17222	8.6873	1.57872	4.62496	7.7898	1.64896
8.6131	7.77793	2.50813	0.8379	3.72599	6.35001	1.42771	2.02351	6.91599	10.2187	6.38631	0.557605	1.69334	1.64101	3.88849	1.13716	8.015	2.99011	10.0052	2.17397	8.67904	1.57986	4.64342	7.77193	1.64981
8.61977	7.76754	2.50795	0.839053	3.71716	6.31702	1.43624	2.02428	6.91858	10.2198	6.40213	0.556928	1.69616	1.64226	3.89353	1.13792	8.07121	2.97821	10.0224	2.17577	8.66987	1.58107	4.66209	7.75343	1.65062
8.62644	7.75755	2.50778	0.84025	3.70668	6.27854	1.44505	2.02507	6.92115	10.2213	6.41777	0.55626	1.69896	1.64351	3.89844	1.13868	8.1279	2.96604	10.0399	2.1776	8.65983	1.58235	4.68097	7.73434	1.65141
8.6331	7.748	2.50763	0.84149	3.69458	6.23468	1.45415	2.02587	6.92369	10.2232	6.43324	0.555601	1.70174	1.64478	3.90322	1.13944	8.18507	2.95364	10.0576	2.17947	8.64891	1.58369	4.70006	7.71471	1.65217
8.63977	7.73885	2.5075	0.842777	3.68086	6.18557	1.46354	2.0267	6.92624	10.2253	6.44854	0.55495	1.70451	1.64606	3.90787	1.14021	8.24274	2.94099	10.0756	2.18138	8.63716	1.58509	4.71938	7.69459	1.65291
8.64644	7.73012	2.50739	0.844107	3.66554	6.13136	1.47325	2.02754	6.92878	10.2278	6.46368	0.554307	1.70726	1.64735	3.91242	1.14097	8.30091	2.92811	10.0938	2.18331	8.62458	1.58656	4.73891	7.67402	1.65361
8.6531	7.7218	2.50729	0.845479	3.64864	6.07221	1.4833	2.02841	6.93133	10.2306	6.47868	0.553671	1.71	1.64866	3.91689	1.14174	8.3596	2.91501	10.1122	2.18527	8.6112	1.58809	4.75868	7.65304	1.6543
8.65977	7.71388	2.50722	0.846899	3.63019	6.00831	1.49369	2.02929	6.93389	10.2337	6.49354	0.553044	1.71272	1.64998	3.92127	1.14252	8.41881	2.90169	10.1308	2.18725	8.59705	1.58968	4.77867	7.6317	1.65496
8.66644	7.70636	2.50717	0.848364	3.61022	5.93987	1.50445	2.03019	6.93646	10.2371	6.50827	0.552424	1.71542	1.65132	3.92558	1.1433	8.47855	2.88815	10.1496	2.18925	8.58215	1.59133	4.79889	7.61002	1.65561
8.6731	7.69924	2.50714	0.849873	3.58876	5.86709	1.5156	2.03111	6.93905	10.2408	6.52289	0.551811	1.71811	1.65267	3.92985	1.14409	8.53882	2.87442	10.1685	2.19127	8.56651	1.59304	4.81934	7.58806	1.65623
8.67977	7.69248	2.50714	0.851428	3.56585	5.79023	1.52715	2.03204	6.94167	10.2449	6.53741	0.551206	1.72079	1.65404	3.93408	1.14489	8.59963	2.8605	10.1876	2.1933	8.55017	1.5948	4.84003	7.56583	1.65684
8.68644	7.6861	2.50717	0.853027	3.54153	5.70955	1.53913	2.033	6.94431	10.2492	6.55184	0.550608	1.72345	1.65543	3.93829	1.1457	8.66097	2.84639	10.2068	2.19534	8.53313	1.59662	4.86096	7.54338	1.65744
8.6931	7.68008	2.50722	0.85467	3.51586	5.62531	1.55156	2.03396	6.94698	10.2538	6.5662	0.550016	1.7261	1.65685	3.9425	1.14652	8.72283	2.8321	10.2261	2.19738	8.51544	1.5985	4.88212	7.52073	1.65802
8.69977	7.6744	2.50731	0.856358	3.4889	5.53781	1.56446	2.03494	6.94968	10.2587	6.58049	0.549432	1.72874	1.65828	3.94673	1.14735	8.78524	2.81765	10.2454	2.19942	8.49711	1.60043	4.90352	7.49792	1.6586
8.70644	7.66906	2.50742	0.858087	3.4607	5.44735	1.57784	2.03594	6.9524	10.2638	6.59473	0.548855	1.73137	1.65973	3.95099	1.1482	8.84816	2.80305	10.2648	2.20146	8.47816	1.60241	4.92516	7.47496	1.65916
8.7131	7.66404	2.50757	0.859861	3.43133	5.35425	1.59174	2.03694	6.95516	10.2692	6.60893	0.548284	1.73398	1.66121	3.9553	1.14906	8.91159	2.78829	10.2843	2.20348	8.45863	1.60445	4.94704	7.45188	1.65972
8.71977	7.65932	2.50776	0.861677	3.40086	5.25883	1.60618	2.03796	6.95794	10.2749	6.62311	0.54772	1.73658	1.66271	3.95968	1.14993	8.97551	2.77341	10.3038	2.2055	8.43852	1.60654	4.96915	7.42871	1.66028
8.72644	7.6549	2.50798	0.863534	3.36938	5.16144	1.62118	2.03899	6.96075	10.2808	6.63728	0.547162	1.73917	1.66423	3.96415	1.15082	9.03992	2.75839	10.3233	2.20749	8.41788	1.60868	4.9915	7.40545	1.66083
8.7331	7.65076	2.50824	0.865428	3.33696	5.06241	1.63677	2.04002	6.96359	10.2869	6.65146	0.546611	1.74174	1.66578	3.96872	1.15173	9.10478	2.74327	10.3428	2.20946	8.39671	1.61087	5.01409	7.38213	1.66138
8.73977	7.64689	2.50854	0.867361	3.30369	4.96208	1.65297	2.04107	6.96645	10.2932	6.66565	0.546067	1.74431	1.66736	3.9734	1.15265	9.1701	2.72803	10.3623	2.2114	8.37504	1.61311	5.03691	7.35877	1.66194
8.74644	7.64326	2.50888	0.869331	3.26967	4.86082	1.6698	2.04212	6.96933	10.2997	6.67988	0.545529	1.74686	1.66897	3.97822	1.15359	9.23582	2.7127	10.3817	2.2133	8.35291	1.6154	5.05997	7.33537	1.6625
8.7531	7.63987	2.50926	0.871338	3.235	4.75897	1.68729	2.04317	6.97224	10.3065	6.69416	0.544997	1.7494	1.6706	3.98319	1.15454	9.30192	2.69728	10.4011	2.21517	8.33032	1.61774	5.08325	7.31194	1.66306
8.75977	7.6367	2.50968	0.873375	3.19978	4.65688	1.70546	2.04424	6.97516	10.3134	6.7085	0.544473	1.75193	1.67226	3.98833	1.15551	9.36839	2.68179	10.4204	2.21699	8.3073	1.62013	5.10677	7.2885	1.66363
8.76644	7.63374	2.51015	0.875447	3.16411	4.5549	1.72435	2.0453	6.9781	10.3205	6.72292	0.543954	1.75445	1.67395	3.99364	1.1565	9.43517	2.66624	10.4397	2.21877	8.28388	1.62256	5.13052	7.26505	1.66421
8.7731	7.63097	2.51066	0.877544	3.12811	4.45337	1.74396	2.04637	6.98104	10.3277	6.73743	0.543443	1.75696	1.67568	3.99915	1.15751	9.50224	2.65064	10.4589	2.22049	8.26008	1.62504	5.15449	7.2416	1.66479
8.77977	7.62838	2.51122	0.87967	3.09189	4.35263	1.76433	2.04744	6.98399	10.3351	6.75205	0.542937	1.75946	1.67743	4.00485	1.15853	9.56955	2.63499	10.478	2.22215	8.23593	1.62757	5.1787	7.21816	1.66539
8.78644	7.62596	2.51183	0.881819	3.05556	4.25301	1.78548	2.04852	6.98695	10.3426	6.76678	0.542439	1.76195	1.67922	4.01078	1.15957	9.63705	2.61932	10.4969	2.22376	8.21144	1.63014	5.20312	7.19473	1.66601
8.7931	7.6237	2.51249	0.88399	3.01923	4.1548	1.80742	2.04959	6.98989	10.3502	6.78164	0.541947	1.76443	1.68104	4.01694	1.16062	9.70472	2.60362	10.5158	2.22529	8.18665	1.63276	5.22777	7.17132	1.66663
8.79977	7.62158	2.5132	0.886179	2.98302	4.05832	1.83018	2.05067	6.99283	10.3579	6.79665	0.541462	1.76689	1.68289	4.02333	1.1617	9.77249	2.58792	10.5346	2.22676	8.16156	1.63543	5.25265	7.14794	1.66727
8.80644	7.61959	2.51396	0.888384	2.94704	3.96384	1.85378	2.05175	6.99577	10.3657	6.81182	0.540985	1.76935	1.68478	4.02997	1.16278	9.84032	2.57222	10.5533	2.22815	8.13622	1.63814	5.27775	7.12457	1.66793
8.8131	7.61773	2.51478	0.890598	2.91141	3.87163	1.87823	2.05284	6.99867	10.3736	6.82715	0.540514	1.7718	1.6867	4.03687	1.16388	9.90815	2.55653	10.5718	2.22947	8.11064	1.64089	5.30306	7.10124	1.66861
8.81977	7.61599	2.51565	0.892823	2.87623	3.78193	1.90355	2.05392	7.00156	10.3815	6.84267	0.540051	1.77424	1.68866	4.04403	1.16498	9.97594	2.54087	10.5903	2.2307	8.08485	1.64369	5.3286	7.07794	1.6693
8.82644	7.61435	2.51657	0.895055	2.84162	3.69497	1.92975	2.05501	7.00441	10.3895	6.85838	0.539595	1.77668	1.69065	4.05145	1.16611	10.0436	2.52523	10.6086	2.23184	8.05887	1.64653	5.35437	7.05468	1.67001
8.8331	7.61283	2.51755	0.897285	2.80768	3.61095	1.95684	2.05611	7.00723	10.3975	6.87428	0.539147	1.7791	1.69268	4.05915	1.16724	10.1112	2.50965	10.6268	2.23289	8.03272	1.64941	5.38035	7.03145	1.67075
8.83977	7.61139	2.51858	0.899515	2.77449	3.53005	1.98483	2.05721	7.01001	10.4056	6.89041	0.538707	1.78152	1.69475	4.06711	1.16838	10.1785	2.49411	10.6448	2.23386	8.00644	1.65233	5.40657	7.00827	1.6715
8.84644	7.61006	2.51968	0.901735	2.74216	3.45243	2.01373	2.05831	7.01274	10.4136	6.90675	0.538276	1.78393	1.69685	4.07536	1.16953	10.2455	2.47864	10.6628	2.23472	7.98003	1.6553	5.433	6.98513	1.67228
8.8531	7.60881	2.52083	0.903947	2.71077	3.37822	2.04355	2.05943	7.01543	10.4216	6.92332	0.537853	1.78633	1.69899	4.08389	1.17068	10.3122	2.46325	10.6807	2.23548	7.95353	1.6583	5.45966	6.96205	1.67308
8.85977	7.60765	2.52204	0.906143	2.68039	3.30752	2.07427	2.06055	7.01806	10.4296	6.94012	0.537439	1.78873	1.70116	4.0927	1.17184	10.3785	2.44794	10.6984	2.23615	7.92698	1.66135	5.48655	6.93901	1.6739
8.86644	7.60658	2.52331	0.908323	2.6511	3.24043	2.10591	2.06169	7.02062	10.4376	6.95718	0.537033	1.79112	1.70337	4.10178	1.17301	10.4444	2.43273	10.7161	2.2367	7.90037	1.66444	5.51368	6.91604	1.67474
8.8731	7.6056	2.52463	0.910478	2.62295	3.17699	2.13846	2.06283	7.02312	10.4455	6.97448	0.536638	1.79351	1.70562	4.11115	1.17417	10.5098	2.41761	10.7337	2.23715	7.87374	1.66756	5.54104	6.89313	1.67561
8.87977	7.60472	2.52602	0.912604	2.59599	3.11724	2.1719	2.064	7.02555	10.4533	6.99204	0.536252	1.79589	1.7079	4.12079	1.17534	10.5746	2.40261	10.7512	2.23749	7.84713	1.67073	5.56864	6.87027	1.6765
8.88644	7.60393	2.52748	0.914701	2.57026	3.06118	2.20624	2.06518	7.0279	10.4611	7.00986	0.535876	1.79827	1.71022	4.1307	1.17651	10.6387	2.38773	10.7687	2.23772	7.82054	1.67393	5.59648	6.8475	1.67742
8.8931	7.60324	2.52898	0.916758	2.54581	3.00881	2.24144	2.06638	7.03017	10.4688	7.02794	0.53551	1.80065	1.71257	4.14087	1.17767	10.7022	2.37297	10.7861	2.23784	7.79401	1.67717	5.62458	6.82479	1.67836
8.89977	7.60265	2.53056	0.918777	2.52264	2.96009	2.2775	2.0676	7.03237	10.4763	7.04629	0.535156	1.80303	1.71496	4.15131	1.17884	10.7649	2.35835	10.8035	2.23784	7.76756	1.68045	5.65292	6.80215	1.67932
8.90644	7.60217	2.5322	0.92075	2.50076	2.91495	2.3144	2.06884	7.03447	10.4838	7.06491	0.534812	1.8054	1.71738	4.162	1.17999	10.8269	2.34388	10.8209	2.23772	7.74121	1.68377	5.68153	6.77959	1.68031
8.91311	7.60182	2.53389	0.922671	2.48019	2.87333	2.3521	2.0701	7.03647	10.4911	7.08379	0.53448	1.80778	1.71983	4.17295	1.18115	10.8879	2.32955	10.8382	2.23749	7.71499	1.68712	5.7104	6.75711	1.68133
8.91977	7.60159	2.53565	0.924544	2.46091	2.83511	2.39059	2.0714	7.03839	10.4983	7.10295	0.53416	1.81015	1.72231	4.18412	1.18229	10.9481	2.31539	10.8556	2.23713	7.68892	1.69051	5.73955	6.7347	1.68236
8.92644	7.6015	2.53747	0.926359	2.4429	2.80021	2.42982	2.07271	7.0402	10.5054	7.12239	0.533853	1.81253	1.72482	4.19554	1.18343	11.0072	2.30138	10.873	2.23666	7.66302	1.69394	5.76898	6.71237	1.68342
8.93311	7.60156	2.53936	0.928113	2.42614	2.76848	2.46976	2.07406	7.04193	10.5123	7.14208	0.533558	1.81491	1.72736	4.20717	1.18455	11.0654	2.28755	10.8904	2.23607	7.63733	1.6974	5.7987	6.69012	1.68451
8.93977	7.60178	2.54131	0.929802	2.41061	2.73979	2.51038	2.07544	7.04353	10.5191	7.16205	0.533276	1.8173	1.72993	4.21902	1.18567	11.1224	2.2739	10.9079	2.23536	7.61185	1.7009	5.82872	6.66794	1.68562
8.94644	7.60216	2.54331	0.931424	2.39625	2.71399	2.55163	2.07684	7.04504	10.5257	7.18228	0.533009	1.81968	1.73253	4.23106	1.18677	11.1782	2.26043	10.9254	2.23453	7.58662	1.70444	5.85905	6.64582	1.68675
8.95311	7.60273	2.54539	0.932973	2.38304	2.69092	2.59347	2.07828	7.04645	10.5321	7.20277	0.532755	1.82208	1.73515	4.2433	1.18786	11.2329	2.24714	10.9431	2.23358	7.56165	1.70801	5.8897	6.62376	1.68791
8.95977	7.6035	2.54752	0.934453	2.37091	2.67042	2.63584	2.07976	7.04775	10.5383	7.22352	0.532515	1.82448	1.73779	4.25572	1.18893	11.2863	2.23405	10.9608	2.2325	7.53696	1.71162	5.92068	6.60175	1.68909
8.96644	7.60448	2.54971	0.93585	2.35982	2.65232	2.67869	2.08126	7.04894	10.5444	7.24452	0.53229	1.82689	1.74046	4.26831	1.18999	11.3384	2.22115	10.9786	2.23132	7.51259	1.71526	5.952	6.57979	1.69029
8.97311	7.60568	2.55197	0.937172	2.34971	2.63646	2.72197	2.0828	7.05003	10.5503	7.26577	0.53208	1.82931	1.74314	4.28105	1.19103	11.3892	2.20846	10.9966	2.23001	7.48854	1.71894	5.98366	6.55785	1.69151
8.97977	7.60712	2.55429	0.938416	2.34053	2.62265	2.76562	2.08438	7.05101	10.556	7.28725	0.531886	1.83173	1.74584	4.29393	1.19206	11.4385	2.19596	11.0147	2.22859	7.46482	1.72265	6.01569	6.53592	1.69275
8.98644	7.60881	2.55666	0.939575	2.33222	2.61073	2.80959	2.08599	7.05189	10.5615	7.30897	0.531708	1.83417	1.74856	4.30695	1.19307	11.4863	2.18367	11.033	2.22705	7.44148	1.72639	6.0481	6.51399	1.69402
8.99311	7.61078	2.5591	0.94065	2.32472	2.60052	2.85379	2.08763	7.05266	10.5668	7.33092	0.531545	1.83662	1.75129	4.32008	1.19406	11.5325	2.17159	11.0514	2.2254	7.41851	1.73018	6.08089	6.49205	1.6953
8.99977	7.61303	2.5616	0.941642	2.31796	2.59187	2.89817	2.08931	7.05332	10.572	7.35308	0.531399	1.83909	1.75404	4.33331	1.19503	11.5772	2.15972	11.07	2.22363	7.39594	1.73399	6.11407	6.47006	1.6966
9.00644	7.61557	2.56415	0.942546	2.3119	2.5846	2.94267	2.09103	7.0539	10.5769	7.37546	0.53127	1.84157	1.75679	4.34663	1.19598	11.6203	2.14806	11.0888	2.22176	7.37378	1.73784	6.14767	6.44801	1.69792
9.01311	7.61843	2.56676	0.943365	2.30647	2.57857	2.9872	2.09279	7.05436	10.5817	7.39802	0.531158	1.84407	1.75955	4.36004	1.19691	11.6616	2.13661	11.1077	2.21978	7.35205	1.74173	6.1817	6.42589	1.69926
9.01977	7.62161	2.56943	0.944099	2.30162	2.57361	3.03171	2.09458	7.05474	10.5863	7.42078	0.531064	1.84658	1.76232	4.3735	1.19783	11.7012	2.12539	11.1269	2.21769	7.33075	1.74565	6.21616	6.40365	1.70062
9.02644	7.62515	2.57215	0.944748	2.2973	2.56959	3.0761	2.0964	7.05502	10.5908	7.44371	0.530987	1.84911	1.76508	4.38702	1.19872	11.739	2.11437	11.1462	2.2155	7.30991	1.7496	6.25107	6.38128	1.70199
9.03311	7.62903	2.57493	0.945315	2.29346	2.56637	3.12031	2.09827	7.05521	10.5951	7.46681	0.530928	1.85166	1.76785	4.40058	1.1996	11.7749	2.10357	11.1658	2.21321	7.28953	1.75359	6.28644	6.35875	1.70337
9.03977	7.63329	2.57777	0.945795	2.29005	2.5638	3.16427	2.10017	7.05531	10.5993	7.49008	0.530887	1.85423	1.77062	4.41416	1.20045	11.809	2.09298	11.1856	2.21083	7.26961	1.75761	6.32229	6.33604	1.70477
9.04644	7.63792	2.58065	0.946198	2.28701	2.56178	3.20789	2.1021	7.05533	10.6033	7.51348	0.530865	1.85682	1.77338	4.42775	1.20128	11.841	2.08261	11.2055	2.20834	7.25018	1.76167	6.35862	6.3131	1.70619
9.05311	7.64295	2.58359	0.946516	2.28432	2.56018	3.2511	2.10407	7.05527	10.6072	7.53701	0.530862	1.85944	1.77614	4.44135	1.2021	11.8711	2.07245	11.2257	2.20577	7.23123	1.76576	6.39546	6.28993	1.70761
9.05977	7.6484	2.58658	0.94676	2.28193	2.55889	3.29382	2.10607	7.05513	10.611	7.56066	0.530877	1.86208	1.77889	4.45493	1.2029	11.8992	2.06251	11.2461	2.20311	7.21277	1.76989	6.43281	6.26647	1.70905
9.06644	7.65425	2.58961	0.946927	2.2798	2.55781	3.33597	2.10811	7.05492	10.6147	7.58442	0.530911	1.86474	1.78163	4.4685	1.20368	11.9252	2.05278	11.2666	2.20036	7.19481	1.77404	6.47069	6.24272	1.71049
9.07311	7.66053	2.5927	0.947025	2.2779	2.55685	3.37747	2.11018	7.05465	10.6183	7.60827	0.530965	1.86744	1.78435	4.48203	1.20444	11.949	2.04325	11.2874	2.19753	7.17733	1.77823	6.5091	6.21862	1.71194
9.07977	7.66725	2.59583	0.947049	2.2762	2.55591	3.41825	2.11229	7.05431	10.6219	7.6322	0.531038	1.87016	1.78706	4.49552	1.20519	11.9707	2.03394	11.3083	2.19463	7.16037	1.78246	6.54807	6.19417	1.7134
9.08644	7.67441	2.599	0.947011	2.27466	2.55492	3.45824	2.11443	7.0539	10.6254	7.65619	0.53113	1.8729	1.78975	4.50897	1.20592	11.9902	2.02482	11.3293	2.19165	7.1439	1.78671	6.58759	6.16932	1.71487
9.09311	7.68201	2.60222	0.94691	2.27326	2.55379	3.49734	2.1166	7.05345	10.6288	7.68023	0.531243	1.87568	1.79243	4.52235	1.20663	12.0074	2.01591	11.3505	2.1886	7.12793	1.791	6.62769	6.14404	1.71634
9.09977	7.69007	2.60548	0.94675	2.27198	2.55247	3.5355	2.1188	7.05293	10.6323	7.70429	0.531374	1.87849	1.79508	4.53567	1.20733	12.0224	2.00721	11.3718	2.18548	7.11245	1.79532	6.66836	6.11832	1.71782
9.10644	7.69857	2.60878	0.946535	2.27079	2.5509	3.57263	2.12103	7.05237	10.6357	7.72838	0.531525	1.88133	1.79771	4.54892	1.20802	12.0352	1.9987	11.3932	2.1823	7.09746	1.79967	6.70964	6.09213	1.71929
9.11311	7.70755	2.61211	0.94627	2.26967	2.549	3.60867	2.12329	7.05176	10.6392	7.75246	0.531695	1.8842	1.80031	4.56209	1.20869	12.0456	1.99038	11.4147	2.17906	7.08296	1.80405	6.75151	6.06543	1.72078
9.11977	7.71697	2.61548	0.94596	2.26861	2.54675	3.64355	2.12557	7.0511	10.6427	7.77654	0.531884	1.88711	1.80288	4.57517	1.20936	12.0536	1.98225	11.4363	2.17577	7.06894	1.80846	6.794	6.0382	1.72226
9.12644	7.72684	2.61889	0.945609	2.26759	2.54409	3.6772	2.12789	7.05041	10.6463	7.80058	0.532093	1.89004	1.80543	4.58818	1.21001	12.0594	1.97431	11.4579	2.17242	7.05538	1.8129	6.83711	6.01043	1.72374
9.13311	7.73717	2.62233	0.94522	2.26658	2.54098	3.70955	2.13023	7.04968	10.6499	7.82457	0.532321	1.89302	1.80795	4.60109	1.21065	12.0627	1.96656	11.4796	2.16903	7.04229	1.81737	6.88085	5.98209	1.72522
9.13977	7.74794	2.62579	0.944802	2.2656	2.53739	3.74055	2.1326	7.04891	10.6537	7.84849	0.532567	1.89602	1.81043	4.61392	1.21129	12.0637	1.95898	11.5012	2.16559	7.02966	1.82186	6.92523	5.95316	1.7267
9.14644	7.75915	2.62929	0.944353	2.26461	2.53331	3.77013	2.13499	7.04811	10.6576	7.87232	0.532832	1.89907	1.81288	4.62666	1.21192	12.0624	1.95158	11.5228	2.16212	7.01746	1.82639	6.97025	5.92363	1.72818
9.15311	7.77079	2.63281	0.943888	2.26361	2.52869	3.79825	2.1374	7.04728	10.6617	7.89606	0.533116	1.90215	1.81529	4.63931	1.21255	12.0586	1.94436	11.5444	2.1586	7.00568	1.83093	7.01593	5.89348	1.72965
9.15977	7.78284	2.63635	0.943401	2.2626	2.52352	3.82484	2.13983	7.04642	10.6659	7.91966	0.533417	1.90527	1.81767	4.65188	1.21317	12.0525	1.9373	11.5658	2.15506	6.99433	1.83551	7.06228	5.8627	1.73112
9.16644	7.7953	2.63992	0.942904	2.26157	2.5178	3.84985	2.14229	7.04553	10.6703	7.94313	0.533735	1.90842	1.82001	4.66436	1.21379	12.044	1.93041	11.5872	2.15149	6.98338	1.84011	7.10929	5.83128	1.73259
9.17311	7.80815	2.6435	0.942399	2.2605	2.51151	3.87325	2.14476	7.04461	10.6749	7.96644	0.534071	1.91161	1.82231	4.67677	1.21441	12.0332	1.92368	11.6084	2.14789	6.9728	1.84473	7.15697	5.7992	1.73406
9.17977	7.82137	2.6471	0.941893	2.25941	2.50464	3.89499	2.14725	7.04367	10.6797	7.98956	0.534423	1.91484	1.82458	4.6891	1.21502	12.02	1.91711	11.6295	2.14427	6.9626	1.84938	7.20533	5.76647	1.73552
9.18644	7.83494	2.65071	0.941391	2.25828	2.49719	3.91503	2.14976	7.04271	10.6848	8.01249	0.534791	1.9181	1.8268	4.70138	1.21564	12.0045	1.91069	11.6504	2.14064	6.95275	1.85405	7.25438	5.73307	1.73697
9.19311	7.84884	2.65434	0.940897	2.25711	2.48917	3.93333	2.15228	7.04171	10.6902	8.03518	0.535174	1.9214	1.82898	4.71359	1.21626	11.9867	1.90442	11.6711	2.13699	6.94323	1.85874	7.30411	5.69901	1.73842
9.19977	7.86305	2.65798	0.940413	2.25591	2.48058	3.94986	2.15482	7.04068	10.6958	8.05764	0.535572	1.92474	1.83112	4.72576	1.21689	11.9667	1.8983	11.6915	2.13333	6.93404	1.86345	7.35454	5.66428	1.73987
9.20644	7.87754	2.66162	0.939949	2.25466	2.47144	3.9646	2.15737	7.03964	10.7017	8.07984	0.535985	1.92812	1.83321	4.73789	1.21752	11.9443	1.89232	11.7117	2.12966	6.92514	1.86818	7.40566	5.6289	1.74132
9.21311	7.89229	2.66527	0.939506	2.25339	2.46174	3.97753	2.15993	7.03857	10.7079	8.10175	0.53641	1.93153	1.83527	4.75	1.21815	11.9198	1.88647	11.7317	2.12599	6.91652	1.87292	7.45748	5.59286	1.74276
9.21977	7.90726	2.66893	0.939089	2.25207	2.45151	3.98862	2.16251	7.03747	10.7145	8.12335	0.536849	1.93498	1.83728	4.76209	1.2188	11.8932	1.88077	11.7514	2.12232	6.90816	1.87769	7.50999	5.55617	1.74419
9.22644	7.92243	2.67258	0.938705	2.25073	2.44077	3.99786	2.16509	7.03634	10.7214	8.14462	0.537299	1.93846	1.83925	4.77419	1.21945	11.8644	1.87519	11.7708	2.11865	6.90005	1.88246	7.56321	5.51884	1.74562
9.23311	7.93776	2.67624	0.938353	2.24935	2.42953	4.00524	2.16768	7.03517	10.7286	8.16554	0.537761	1.94198	1.84118	4.7863	1.22011	11.8335	1.86975	11.7899	2.11498	6.89217	1.88726	7.61712	5.48089	1.74705
9.23977	7.95322	2.6799	0.938042	2.24796	2.41783	4.01074	2.17028	7.03397	10.7362	8.1861	0.538233	1.94553	1.84306	4.79844	1.22078	11.8006	1.86442	11.8087	2.11133	6.88449	1.89206	7.67173	5.44233	1.74848
9.24644	7.96876	2.68355	0.937774	2.24653	2.40567	4.01438	2.17289	7.03274	10.7442	8.20625	0.538715	1.94912	1.8449	4.81062	1.22146	11.7657	1.85922	11.8272	2.10768	6.87699	1.89688	7.72705	5.40317	1.74991
9.25311	7.98437	2.6872	0.937551	2.2451	2.39309	4.01614	2.1755	7.03147	10.7525	8.22599	0.539206	1.95274	1.8467	4.82286	1.22215	11.7289	1.85414	11.8454	2.10405	6.86965	1.90171	7.78306	5.36343	1.75133
9.25977	7.99999	2.69084	0.937377	2.24366	2.38013	4.01604	2.17811	7.03016	10.7612	8.24529	0.539705	1.95639	1.84846	4.83519	1.22286	11.6902	1.84918	11.8632	2.10044	6.86247	1.90655	7.83977	5.32313	1.75275
9.26644	8.01558	2.69448	0.937258	2.24221	2.3668	4.01408	2.18073	7.02882	10.7703	8.26413	0.540212	1.96007	1.85017	4.8476	1.22358	11.6497	1.84432	11.8807	2.09684	6.85541	1.91139	7.89717	5.2823	1.75418
9.27311	8.03111	2.6981	0.937191	2.24077	2.35314	4.01027	2.18335	7.02742	10.7797	8.28249	0.540724	1.96378	1.85185	4.86013	1.22431	11.6075	1.83958	11.8979	2.09327	6.84847	1.91625	7.95527	5.24095	1.7556
9.27977	8.04654	2.70172	0.937185	2.23934	2.33918	4.00464	2.18597	7.02597	10.7895	8.30033	0.541243	1.96752	1.85349	4.87279	1.22506	11.5635	1.83495	11.9148	2.08972	6.84162	1.92111	8.01406	5.19913	1.75702
9.28644	8.06182	2.70533	0.937237	2.23792	2.32495	3.9972	2.18859	7.02449	10.7997	8.31766	0.541766	1.97129	1.85508	4.8856	1.22582	11.518	1.83042	11.9314	2.08619	6.83485	1.92597	8.07354	5.15684	1.75845
9.29311	8.0769	2.70893	0.937351	2.23654	2.3105	3.98798	2.19122	7.02294	10.8102	8.33444	0.542293	1.97508	1.85664	4.89857	1.2266	11.4709	1.826	11.9476	2.08269	6.82813	1.93084	8.13371	5.11413	1.75988
9.29977	8.09174	2.71251	0.937529	2.23518	2.29585	3.97701	2.19384	7.02134	10.8211	8.35065	0.542824	1.9789	1.85817	4.91172	1.2274	11.4223	1.82168	11.9636	2.07923	6.82146	1.93571	8.19456	5.07102	1.76131
9.30644	8.10631	2.71609	0.937768	2.23387	2.28104	3.96431	2.19646	7.01968	10.8323	8.36627	0.543357	1.98274	1.85966	4.92508	1.22821	11.3722	1.81746	11.9793	2.07579	6.81482	1.94059	8.25611	5.02753	1.76275
9.31311	8.12055	2.71965	0.938076	2.23261	2.2661	3.94992	2.19908	7.01797	10.8439	8.38128	0.543891	1.9866	1.86112	4.93865	1.22903	11.3209	1.81334	11.9947	2.07239	6.80819	1.94546	8.31836	4.98372	1.76419
9.31977	8.13442	2.7232	0.938448	2.23141	2.25108	3.93387	2.20169	7.01619	10.8557	8.39568	0.544427	1.99048	1.86254	4.95245	1.22988	11.2682	1.80931	12.0099	2.06902	6.80156	1.95034	8.38129	4.9396	1.76564
9.32644	8.14788	2.72674	0.938891	2.23027	2.23599	3.91622	2.2043	7.01435	10.8679	8.40942	0.544962	1.99437	1.86393	4.9665	1.23074	11.2144	1.80539	12.0248	2.0657	6.79492	1.95521	8.44493	4.89522	1.76709
9.33311	8.16088	2.73026	0.939396	2.22922	2.22089	3.897	2.20691	7.01244	10.8803	8.4225	0.545498	1.99828	1.86529	4.98081	1.23161	11.1594	1.80156	12.0395	2.06241	6.78824	1.96008	8.50927	4.8506	1.76855
9.33977	8.17337	2.73377	0.939968	2.22824	2.2058	3.87626	2.20952	7.01046	10.893	8.43491	0.546032	2.00221	1.86663	4.9954	1.23251	11.1034	1.79782	12.0539	2.05916	6.78153	1.96495	8.57433	4.80579	1.77002
9.34644	8.18532	2.73728	0.940608	2.22736	2.19076	3.85404	2.21212	7.00842	10.906	8.44661	0.546565	2.00615	1.86794	5.01028	1.23342	11.0463	1.79418	12.0682	2.05595	6.77477	1.96981	8.6401	4.76082	1.7715
9.35311	8.19668	2.74077	0.941311	2.22658	2.17579	3.83041	2.21471	7.00629	10.9191	8.45761	0.547095	2.0101	1.86922	5.02548	1.23434	10.9884	1.79064	12.0822	2.05279	6.76795	1.97466	8.7066	4.71571	1.77298
9.35977	8.20743	2.74424	0.942076	2.22591	2.16094	3.80541	2.2173	7.0041	10.9325	8.4679	0.547623	2.01406	1.87048	5.04098	1.23529	10.9296	1.78718	12.0961	2.04967	6.76105	1.97951	8.77384	4.67052	1.77448
9.36644	8.21749	2.74771	0.942905	2.22536	2.14622	3.7791	2.21988	7.00183	10.946	8.47744	0.548147	2.01803	1.87172	5.05681	1.23625	10.87	1.78383	12.1097	2.0466	6.75408	1.98435	8.84183	4.62528	1.77598
9.37311	8.22684	2.75117	0.943795	2.22493	2.13168	3.75154	2.22245	6.99949	10.9597	8.48624	0.548669	2.022	1.87294	5.07298	1.23722	10.8097	1.78056	12.1232	2.04358	6.74701	1.98918	8.91059	4.58002	1.77749
9.37977	8.23546	2.75462	0.944744	2.22463	2.11733	3.72278	2.22502	6.99707	10.9735	8.49428	0.549186	2.02597	1.87414	5.08949	1.23821	10.7488	1.77739	12.1366	2.04061	6.73985	1.994	8.98014	4.53478	1.77902
9.38644	8.24329	2.75806	0.945748	2.22447	2.10321	3.69289	2.22758	6.99458	10.9874	8.50156	0.5497	2.02995	1.87532	5.10635	1.23922	10.6873	1.77432	12.1498	2.03769	6.73259	1.99881	9.05049	4.48959	1.78055
9.39311	8.25031	2.76149	0.946809	2.22445	2.08933	3.66194	2.23013	6.99202	11.0014	8.50807	0.550209	2.03393	1.87649	5.12357	1.24024	10.6252	1.77134	12.1628	2.03482	6.72522	2.00361	9.12167	4.44449	1.7821
9.39977	8.25649	2.76491	0.947922	2.22458	2.07572	3.62998	2.23268	6.98937	11.0154	8.51379	0.550714	2.0379	1.87765	5.14115	1.24127	10.5628	1.76847	12.1757	2.03201	6.71773	2.0084	9.1937	4.39952	1.78366
9.40644	8.26178	2.76832	0.949083	2.22487	2.0624	3.59708	2.23522	6.98666	11.0294	8.51874	0.551215	2.04187	1.87879	5.15909	1.24232	10.4999	1.76568	12.1885	2.02925	6.71012	2.01317	9.2666	4.35471	1.78523
9.41311	8.26616	2.77173	0.950291	2.22532	2.04938	3.56332	2.23775	6.98387	11.0434	8.5229	0.551711	2.04584	1.87993	5.1774	1.24338	10.4368	1.763	12.2011	2.02654	6.70238	2.01792	9.3404	4.3101	1.78681
9.41977	8.26961	2.77513	0.951544	2.22593	2.0367	3.52874	2.24027	6.98101	11.0573	8.52626	0.552203	2.0498	1.88105	5.19608	1.24445	10.3733	1.76042	12.2135	2.0239	6.6945	2.02266	9.41513	4.26572	1.7884
9.42644	8.2721	2.77853	0.952839	2.2267	2.02435	3.49343	2.24278	6.97808	11.0712	8.52885	0.552691	2.05375	1.88217	5.21511	1.24554	10.3097	1.75794	12.2258	2.02131	6.6865	2.02739	9.4908	4.2216	1.79
9.43311	8.27361	2.78192	0.954167	2.22764	2.01236	3.45745	2.24529	6.97508	11.0849	8.53063	0.553175	2.05769	1.88328	5.23451	1.24664	10.2459	1.75556	12.238	2.01878	6.67835	2.03209	9.56748	4.17779	1.79161
9.43977	8.27411	2.78531	0.955534	2.22875	2.00073	3.42087	2.24779	6.97203	11.0985	8.53164	0.553656	2.06162	1.88438	5.25426	1.24775	10.1821	1.7533	12.2499	2.01631	6.67006	2.03677	9.64518	4.1343	1.79324
9.44644	8.27359	2.78869	0.956932	2.23003	1.98948	3.38375	2.25027	6.9689	11.112	8.53186	0.554133	2.06554	1.88549	5.27437	1.24887	10.1182	1.75113	12.2617	2.0139	6.66162	2.04144	9.72395	4.09119	1.79487
9.45311	8.27203	2.79206	0.958359	2.23148	1.97861	3.34617	2.25276	6.96571	11.1252	8.5313	0.554608	2.06944	1.88659	5.29482	1.25	10.0543	1.74908	12.2734	2.01156	6.65303	2.04608	9.8038	4.04846	1.79651
9.45977	8.26942	2.79543	0.959809	2.23309	1.96812	3.30818	2.25523	6.96246	11.1382	8.52997	0.55508	2.07333	1.88769	5.3156	1.25114	9.99042	1.74714	12.2848	2.00928	6.64429	2.0507	9.8848	4.00617	1.79816
9.46644	8.26575	2.7988	0.961281	2.23487	1.95803	3.26987	2.2577	6.95916	11.151	8.52788	0.555549	2.0772	1.88878	5.33671	1.25229	9.92669	1.74531	12.296	2.00706	6.63539	2.0553	9.96696	3.96434	1.79982
9.47311	8.26099	2.80216	0.962773	2.23682	1.94832	3.23129	2.26016	6.95581	11.1635	8.52502	0.556018	2.08105	1.88989	5.35814	1.25345	9.86311	1.7436	12.307	2.00491	6.62633	2.05987	10.0503	3.923	1.80149
9.47977	8.25517	2.80551	0.964277	2.23893	1.93901	3.1925	2.26261	6.9524	11.1756	8.52142	0.556484	2.08488	1.89099	5.37987	1.25462	9.79972	1.742	12.3178	2.00282	6.61711	2.06442	10.135	3.88217	1.80317
9.48644	8.24826	2.80886	0.965797	2.24119	1.93009	3.15358	2.26506	6.94894	11.1875	8.51709	0.556951	2.08869	1.89209	5.40189	1.25579	9.73657	1.74053	12.3283	2.0008	6.60772	2.06894	10.2209	3.84189	1.80485
9.49311	8.24025	2.8122	0.967323	2.2436	1.92156	3.11458	2.26749	6.94545	11.199	8.51202	0.557417	2.09248	1.8932	5.42419	1.25697	9.67368	1.73918	12.3385	1.99885	6.59817	2.07343	10.3082	3.80219	1.80654
9.49977	8.23116	2.81553	0.968854	2.24616	1.91342	3.07557	2.26993	6.94191	11.2102	8.50625	0.557883	2.09625	1.89431	5.44676	1.25816	9.6111	1.73796	12.3484	1.99696	6.58845	2.07789	10.3969	3.76308	1.80823
9.50644	8.22098	2.81885	0.97039	2.24887	1.90565	3.0366	2.27236	6.93833	11.221	8.49978	0.558351	2.1	1.89543	5.46958	1.25935	9.54887	1.73687	12.3581	1.99515	6.57854	2.08232	10.4871	3.72459	1.80993
9.51311	8.20972	2.82216	0.971924	2.2517	1.89826	2.99774	2.27478	6.93472	11.2314	8.49262	0.558819	2.10372	1.89655	5.49263	1.26055	9.48701	1.7359	12.3673	1.9934	6.56846	2.08672	10.5787	3.68675	1.81163
9.51978	8.19739	2.82546	0.973456	2.25466	1.89123	2.95904	2.2772	6.93107	11.2414	8.4848	0.55929	2.10742	1.89768	5.5159	1.26175	9.42556	1.73507	12.3763	1.99173	6.5582	2.09109	10.6719	3.64958	1.81334
9.52644	8.18398	2.82876	0.974984	2.25775	1.88456	2.92055	2.27961	6.9274	11.2509	8.47632	0.559763	2.11109	1.89881	5.53937	1.26296	9.36454	1.73438	12.3849	1.99012	6.54776	2.09542	10.7666	3.6131	1.81505
9.53311	8.16951	2.83203	0.976501	2.26094	1.87823	2.88231	2.28202	6.9237	11.2601	8.46721	0.560239	2.11473	1.89995	5.56303	1.26417	9.30398	1.73383	12.393	1.98858	6.53712	2.09972	10.863	3.57732	1.81676
9.53978	8.154	2.83529	0.978005	2.26424	1.87225	2.8444	2.28443	6.91998	11.2688	8.45749	0.560718	2.11835	1.90109	5.58687	1.26538	9.24393	1.73342	12.4008	1.98712	6.5263	2.10398	10.9611	3.54227	1.81847
9.54644	8.13745	2.83854	0.9795	2.26763	1.86659	2.80685	2.28683	6.91625	11.277	8.44715	0.561202	2.12194	1.90224	5.61085	1.26659	9.18438	1.73315	12.4082	1.98572	6.51527	2.10821	11.0609	3.50796	1.82019
9.55311	8.11988	2.84176	0.980978	2.27111	1.86125	2.7697	2.28923	6.91249	11.2849	8.43625	0.56169	2.1255	1.90339	5.63498	1.26781	9.12537	1.73303	12.415	1.9844	6.50404	2.1124	11.1625	3.47442	1.8219
9.55978	8.10131	2.84497	0.982439	2.27466	1.85621	2.733	2.29163	6.90872	11.2922	8.42479	0.562183	2.12904	1.90455	5.65922	1.26903	9.06691	1.73306	12.4215	1.98314	6.49261	2.11655	11.266	3.44164	1.82361
9.56644	8.08177	2.84816	0.983878	2.27829	1.85147	2.69679	2.29404	6.90495	11.2992	8.41278	0.56268	2.13254	1.90572	5.68357	1.27025	9.00903	1.73325	12.4274	1.98196	6.48096	2.12066	11.3714	3.40965	1.82533
9.57311	8.06126	2.85132	0.985297	2.28198	1.84701	2.66111	2.29644	6.90117	11.3057	8.40024	0.563184	2.13602	1.90689	5.70801	1.27147	8.95175	1.73359	12.4329	1.98084	6.46909	2.12472	11.4788	3.37846	1.82704
9.57978	8.03981	2.85446	0.986695	2.28572	1.84283	2.62598	2.29884	6.89739	11.3118	8.38721	0.563694	2.13947	1.90807	5.73253	1.27268	8.89508	1.73409	12.4378	1.9798	6.457	2.12875	11.5881	3.34807	1.82875
9.58644	8.01745	2.85757	0.988067	2.2895	1.8389	2.59145	2.30125	6.89361	11.3174	8.37369	0.564209	2.14289	1.90925	5.75711	1.2739	8.83903	1.73475	12.4422	1.97882	6.44468	2.13273	11.6995	3.31851	1.83046
9.59311	7.9942	2.86066	0.989415	2.29333	1.83523	2.55753	2.30366	6.88983	11.3227	8.35972	0.564732	2.14628	1.91043	5.78173	1.27512	8.78362	1.73558	12.446	1.97792	6.43212	2.13667	11.8131	3.28977	1.83217
9.59978	7.97008	2.86372	0.990731	2.29718	1.83179	2.52426	2.30607	6.88607	11.3275	8.3453	0.565261	2.14964	1.91162	5.80639	1.27633	8.72887	1.73657	12.4493	1.97708	6.41933	2.14057	11.9288	3.26187	1.83388
9.60644	7.94513	2.86674	0.992023	2.30105	1.82859	2.49167	2.30849	6.88232	11.332	8.33047	0.565797	2.15297	1.91281	5.83108	1.27754	8.67478	1.73773	12.452	1.97631	6.40629	2.14442	12.0468	3.23481	1.83559
9.61311	7.91937	2.86973	0.993286	2.30494	1.8256	2.45976	2.31091	6.87858	11.3361	8.31523	0.566341	2.15628	1.91401	5.85576	1.27875	8.62138	1.73906	12.4541	1.97561	6.393	2.14822	12.167	3.20859	1.83729
9.61978	7.89283	2.87269	0.994518	2.30884	1.82281	2.42857	2.31334	6.87485	11.3398	8.29962	0.566892	2.15955	1.9152	5.88045	1.27996	8.56865	1.74057	12.4556	1.97497	6.37945	2.15198	12.2896	3.18323	1.839
9.62644	7.86556	2.87562	0.995721	2.31274	1.82023	2.3981	2.31578	6.87116	11.3432	8.28364	0.56745	2.16279	1.9164	5.90513	1.28116	8.51662	1.74225	12.4565	1.9744	6.36563	2.15569	12.4145	3.15873	1.8407
9.63311	7.83756	2.8785	0.996889	2.31664	1.81784	2.36837	2.31822	6.86748	11.3463	8.26733	0.568016	2.16601	1.9176	5.92979	1.28235	8.4653	1.74412	12.4568	1.97389	6.35155	2.15935	12.5419	3.13509	1.8424
9.63978	7.80888	2.88136	0.998029	2.32053	1.81563	2.33938	2.32068	6.86383	11.3491	8.25069	0.56859	2.16919	1.9188	5.95442	1.28354	8.41468	1.74616	12.4565	1.97345	6.33719	2.16296	12.6719	3.11231	1.8441
9.64644	7.77954	2.88417	0.999136	2.32441	1.81359	2.31116	2.32315	6.86022	11.3516	8.23376	0.569171	2.17235	1.92	5.97901	1.28472	8.36478	1.74839	12.4556	1.97307	6.32254	2.16653	12.8043	3.09039	1.8458
9.65311	7.7496	2.88694	1.00021	2.32827	1.81172	2.2837	2.32563	6.85664	11.3539	8.21656	0.56976	2.17547	1.9212	6.00355	1.28589	8.3156	1.7508	12.4541	1.97275	6.30761	2.17004	12.9393	3.06934	1.8475
9.65978	7.71908	2.88967	1.00125	2.33212	1.81001	2.25701	2.32812	6.85309	11.3559	8.19909	0.570356	2.17857	1.92241	6.02805	1.28706	8.26713	1.75341	12.4519	1.97249	6.29239	2.1735	13.0771	3.04916	1.8492
9.66644	7.68801	2.89236	1.00226	2.33594	1.80845	2.23108	2.33062	6.8496	11.3578	8.18137	0.570961	2.18164	1.9236	6.05249	1.28822	8.2194	1.7562	12.4491	1.97229	6.27687	2.17692	13.2174	3.02985	1.8509
9.67311	7.65644	2.89501	1.00323	2.33974	1.80704	2.20592	2.33314	6.84614	11.3594	8.16344	0.571573	2.18468	1.9248	6.07688	1.28937	8.1724	1.75918	12.4458	1.97214	6.26105	2.18028	13.3606	3.0114	1.8526
9.67978	7.62439	2.89762	1.00418	2.34352	1.80578	2.18152	2.33568	6.84274	11.361	8.14531	0.572192	2.1877	1.926	6.1012	1.29051	8.12613	1.76235	12.4417	1.97206	6.24493	2.1836	13.5065	2.99381	1.8543
9.68644	7.59191	2.90018	1.00508	2.34727	1.80465	2.15788	2.33823	6.83939	11.3624	8.12699	0.572818	2.19069	1.92719	6.12545	1.29164	8.08059	1.76572	12.4371	1.97202	6.22849	2.18686	13.6552	2.97709	1.856
9.69311	7.55902	2.9027	1.00596	2.35099	1.80365	2.135	2.34081	6.83609	11.3637	8.10851	0.573452	2.19364	1.92838	6.14963	1.29276	8.03579	1.76929	12.4319	1.97204	6.21175	2.19007	13.8068	2.96123	1.85771
9.69978	7.52578	2.90518	1.0068	2.35468	1.80278	2.11286	2.3434	6.83285	11.3649	8.08987	0.574093	2.19657	1.92956	6.17375	1.29386	7.99171	1.77305	12.4261	1.97211	6.1947	2.19323	13.9614	2.94622	1.85942
9.70644	7.49222	2.90762	1.00761	2.35834	1.80203	2.09146	2.34601	6.82968	11.3661	8.07111	0.574741	2.19948	1.93075	6.1978	1.29496	7.94837	1.77702	12.4197	1.97223	6.17733	2.19634	14.1188	2.93207	1.86113
9.71311	7.45837	2.91001	1.00838	2.36197	1.80141	2.07078	2.34864	6.82656	11.3672	8.05223	0.575396	2.20235	1.93192	6.22177	1.29604	7.90576	1.78118	12.4128	1.9724	6.15964	2.1994	14.2792	2.91876	1.86285
9.71978	7.42427	2.91237	1.00913	2.36558	1.8009	2.05081	2.3513	6.82352	11.3684	8.03325	0.576057	2.2052	1.9331	6.24567	1.29711	7.86389	1.78554	12.4052	1.97261	6.14164	2.20241	14.4426	2.9063	1.86457
9.72644	7.38996	2.91468	1.00984	2.36916	1.80052	2.03154	2.35398	6.82055	11.3696	8.0142	0.576724	2.20802	1.93427	6.2695	1.29816	7.82274	1.79011	12.3971	1.97287	6.12333	2.20537	14.6091	2.89468	1.8663
9.73311	7.35547	2.91695	1.01052	2.37271	1.80024	2.01296	2.35669	6.81765	11.3709	7.99508	0.577398	2.21082	1.93543	6.29326	1.2992	7.78231	1.79488	12.3885	1.97318	6.10471	2.20828	14.7786	2.88388	1.86804
9.73978	7.32085	2.91917	1.01116	2.37624	1.80008	1.99505	2.35942	6.81483	11.3723	7.97591	0.578077	2.21359	1.9366	6.31695	1.30022	7.74261	1.79985	12.3794	1.97352	6.08578	2.21114	14.9512	2.87391	1.86978
9.74644	7.28614	2.92136	1.01177	2.37974	1.80003	1.97779	2.36218	6.81209	11.3737	7.95672	0.578761	2.21634	1.93775	6.34057	1.30123	7.70362	1.80502	12.3698	1.9739	6.06654	2.21395	15.1268	2.86476	1.87153
9.75311	7.25137	2.92351	1.01235	2.38322	1.80009	1.96116	2.36497	6.80942	11.3753	7.9375	0.579452	2.21906	1.93891	6.36413	1.30222	7.66535	1.81039	12.3597	1.97432	6.04701	2.2167	15.3056	2.85642	1.87329
9.75978	7.21658	2.92562	1.0129	2.38668	1.80026	1.94516	2.3678	6.80685	11.3771	7.91829	0.580147	2.22176	1.94006	6.38762	1.30319	7.62778	1.81597	12.3491	1.97478	6.02718	2.21942	15.4874	2.84888	1.87506
9.76644	7.1818	2.9277	1.01341	2.39013	1.80054	1.92976	2.37065	6.80435	11.379	7.89909	0.580847	2.22442	1.9412	6.41105	1.30414	7.59092	1.82175	12.3381	1.97527	6.00706	2.22208	15.6724	2.84213	1.87684
9.77311	7.14707	2.92973	1.0139	2.39356	1.80093	1.91494	2.37353	6.80194	11.3811	7.87992	0.581551	2.22707	1.94234	6.43441	1.30508	7.55476	1.82774	12.3266	1.97579	5.98666	2.22469	15.8605	2.83617	1.87863
9.77978	7.11243	2.93173	1.01434	2.39697	1.80142	1.90069	2.37645	6.79962	11.3835	7.8608	0.58226	2.22969	1.94348	6.45773	1.30599	7.5193	1.83392	12.3148	1.97635	5.96599	2.22726	16.0516	2.83099	1.88044
9.78644	7.07792	2.9337	1.01476	2.40038	1.80202	1.887	2.3794	6.79739	11.386	7.84174	0.582972	2.23229	1.94462	6.48098	1.30689	7.48452	1.84031	12.3026	1.97693	5.94505	2.22978	16.2459	2.82657	1.88226
9.79311	7.04357	2.93564	1.01515	2.40377	1.80273	1.87382	2.38239	6.79525	11.3889	7.82275	0.583688	2.23486	1.94575	6.50418	1.30777	7.45042	1.84689	12.29	1.97753	5.92386	2.23225	16.4433	2.8229	1.88409
9.79978	7.00941	2.93754	1.0155	2.40717	1.80355	1.86117	2.38542	6.7932	11.392	7.80385	0.584408	2.23741	1.94688	6.52732	1.30862	7.417	1.85367	12.2771	1.97817	5.90244	2.23468	16.6437	2.81999	1.88595
9.80644	6.97549	2.9394	1.01582	2.41056	1.80447	1.84901	2.38848	6.79124	11.3954	7.78505	0.58513	2.23994	1.948	6.55042	1.30946	7.38425	1.86064	12.2638	1.97882	5.88078	2.23707	16.8471	2.81782	1.88782
9.81311	6.94183	2.94124	1.01611	2.41395	1.8055	1.83732	2.39159	6.78937	11.3992	7.76638	0.585855	2.24244	1.94913	6.57346	1.31027	7.35216	1.86781	12.2503	1.9795	5.85891	2.2394	17.0536	2.81637	1.8897
9.81978	6.90847	2.94305	1.01636	2.41734	1.80664	1.82609	2.39473	6.78759	11.4032	7.74783	0.586582	2.24492	1.95026	6.59646	1.31106	7.32073	1.87517	12.2365	1.98019	5.83684	2.2417	17.263	2.81564	1.89161
9.82644	6.87545	2.94483	1.01658	2.42074	1.8079	1.81531	2.39792	6.7859	11.4076	7.72943	0.587312	2.24738	1.95138	6.61941	1.31183	7.28995	1.88272	12.2225	1.9809	5.81458	2.24396	17.4753	2.81561	1.89353
9.83311	6.84278	2.94658	1.01677	2.42414	1.80926	1.80495	2.40114	6.78429	11.4124	7.71118	0.588044	2.24982	1.9525	6.64231	1.31257	7.25981	1.89046	12.2083	1.98163	5.79215	2.24617	17.6906	2.81629	1.89548
9.83978	6.81052	2.94831	1.01693	2.42756	1.81073	1.795	2.40441	6.78278	11.4175	7.69311	0.588776	2.25224	1.95363	6.66516	1.3133	7.2303	1.89837	12.1939	1.98237	5.76956	2.24834	17.9086	2.81765	1.89745
9.84644	6.77868	2.95001	1.01705	2.431	1.81232	1.78545	2.40772	6.78135	11.423	7.67523	0.58951	2.25463	1.95476	6.68798	1.314	7.20143	1.90647	12.1793	1.98312	5.74684	2.25048	18.1295	2.81968	1.89944
9.85311	6.7473	2.95169	1.01714	2.43446	1.81403	1.77627	2.41108	6.78	11.4289	7.65754	0.590246	2.257	1.95588	6.71074	1.31467	7.17317	1.91474	12.1646	1.98388	5.724	2.25257	18.353	2.82239	1.90146
9.85978	6.71642	2.95333	1.0172	2.43793	1.81584	1.76746	2.41448	6.77874	11.4352	7.64006	0.590982	2.25936	1.95701	6.73345	1.31533	7.14553	1.92318	12.1498	1.98464	5.70106	2.25463	18.5791	2.82574	1.9035
9.86644	6.68604	2.95496	1.01723	2.44144	1.81778	1.75899	2.41793	6.77756	11.4419	7.62281	0.591719	2.2617	1.95814	6.7561	1.31596	7.11849	1.93178	12.135	1.98542	5.67803	2.25665	18.8078	2.82974	1.90558
9.87311	6.65621	2.95656	1.01722	2.44497	1.81984	1.75086	2.42142	6.77644	11.449	7.6058	0.592456	2.26401	1.95927	6.77872	1.31656	7.09205	1.94055	12.12	1.98619	5.65494	2.25864	19.039	2.83438	1.90767
9.87978	6.62695	2.95814	1.01718	2.44854	1.82202	1.74306	2.42495	6.77541	11.4565	7.58904	0.593193	2.26631	1.96041	6.80127	1.31714	7.06621	1.94947	12.1051	1.98697	5.63181	2.26059	19.2726	2.83965	1.9098
9.88644	6.5983	2.9597	1.0171	2.45215	1.82433	1.73556	2.42854	6.77445	11.4645	7.57254	0.59393	2.2686	1.96155	6.82377	1.3177	7.04095	1.95854	12.0901	1.98774	5.60866	2.26251	19.5084	2.84553	1.91195
9.89311	6.57026	2.96123	1.017	2.45579	1.82676	1.72837	2.43216	6.77355	11.4729	7.55631	0.594668	2.27086	1.9627	6.84621	1.31823	7.01627	1.96775	12.0752	1.98851	5.5855	2.2644	19.7465	2.85201	1.91414
9.89978	6.54287	2.96275	1.01686	2.45948	1.82932	1.72145	2.43583	6.77271	11.4817	7.54037	0.595405	2.27312	1.96384	6.86857	1.31874	6.99216	1.97709	12.0603	1.98928	5.56235	2.26625	19.9866	2.8591	1.91635
9.90644	6.51615	2.96424	1.0167	2.46323	1.83201	1.71482	2.43955	6.77193	11.491	7.52473	0.596142	2.27535	1.965	6.89087	1.31923	6.96861	1.98657	12.0455	1.99004	5.53925	2.26808	20.2286	2.86677	1.9186
9.91311	6.49012	2.9657	1.01649	2.46702	1.83484	1.70845	2.44331	6.77121	11.5007	7.50939	0.596878	2.27757	1.96615	6.9131	1.31969	6.94563	1.99616	12.0308	1.9908	5.5162	2.26988	20.4726	2.87501	1.92088
9.91978	6.4648	2.96715	1.01626	2.47087	1.8378	1.70233	2.44712	6.77053	11.5108	7.49438	0.597614	2.27979	1.96732	6.93524	1.32012	6.9232	2.00587	12.0162	1.99154	5.49323	2.27165	20.7182	2.88383	1.92319
9.92644	6.44021	2.96857	1.01601	2.47479	1.84091	1.69647	2.45097	6.76991	11.5214	7.47969	0.598351	2.28198	1.96848	6.9573	1.32054	6.90131	2.01568	12.0017	1.99228	5.47036	2.2734	20.9654	2.89321	1.92554
9.93311	6.41637	2.96997	1.01571	2.47877	1.84416	1.69084	2.45486	6.76932	11.5325	7.46535	0.599087	2.28417	1.96965	6.97926	1.32093	6.87996	2.02559	11.9874	1.99299	5.44761	2.27512	21.2141	2.90313	1.92792
9.93978	6.3933	2.97134	1.0154	2.48282	1.84756	1.68544	2.4588	6.76877	11.544	7.45136	0.599823	2.28635	1.97083	7.00112	1.32129	6.85915	2.03559	11.9734	1.9937	5.42499	2.27681	21.464	2.9136	1.93033
9.94644	6.37101	2.9727	1.01505	2.48695	1.85111	1.68026	2.46277	6.76825	11.5559	7.43772	0.600559	2.28853	1.97201	7.02287	1.32164	6.83887	2.04566	11.9595	1.99438	5.40254	2.27849	21.7152	2.92461	1.93278
9.95311	6.34951	2.97402	1.01468	2.49116	1.85481	1.67529	2.46679	6.76775	11.5683	7.42445	0.601295	2.29069	1.97319	7.04449	1.32196	6.8191	2.05579	11.9458	1.99505	5.38026	2.28014	21.9673	2.93614	1.93526
9.95978	6.32883	2.97533	1.01428	2.49545	1.85868	1.67054	2.47085	6.76728	11.5811	7.41157	0.602032	2.29285	1.97438	7.066	1.32226	6.79986	2.06598	11.9324	1.99569	5.35818	2.28177	22.2203	2.9482	1.93778
9.96644	6.30896	2.9766	1.01385	2.49983	1.8627	1.66598	2.47494	6.76683	11.5944	7.39906	0.60277	2.29501	1.97557	7.08736	1.32253	6.78113	2.07622	11.9193	1.99632	5.33631	2.28338	22.474	2.96076	1.94033
9.97311	6.28994	2.97785	1.0134	2.5043	1.8669	1.66162	2.47907	6.76639	11.608	7.38696	0.603508	2.29717	1.97677	7.10858	1.32279	6.76291	2.08649	11.9064	1.99692	5.31468	2.28498	22.7283	2.97383	1.94292
9.97978	6.27174	2.97907	1.01292	2.50888	1.87127	1.65745	2.48323	6.76595	11.6222	7.37525	0.604248	2.29933	1.97797	7.12964	1.32302	6.74519	2.09678	11.8939	1.99749	5.29329	2.28656	22.983	2.98739	1.94554
9.98644	6.25439	2.98026	1.01242	2.51355	1.87581	1.65347	2.48743	6.76552	11.6367	7.36396	0.604989	2.30149	1.97917	7.15052	1.32324	6.72796	2.10707	11.8816	1.99804	5.27217	2.28812	23.2378	3.00145	1.9482
9.99311	6.2379	2.98143	1.01191	2.51833	1.88054	1.64966	2.49166	6.76508	11.6517	7.35308	0.605732	2.30365	1.98038	7.17123	1.32343	6.71123	2.11737	11.8697	1.99855	5.25133	2.28967	23.4927	3.01599	1.9509
9.99978	6.22227	2.98256	1.01137	2.52323	1.88545	1.64603	2.49592	6.76464	11.667	7.34262	0.606478	2.30582	1.98158	7.19175	1.3236	6.69499	2.12765	11.8582	1.99904	5.2308	2.2912	23.7475	3.03101	1.95362
10.0064	6.2075	2.98365	1.01081	2.52823	1.89055	1.64256	2.50021	6.76419	11.6828	7.33259	0.607227	2.308	1.98279	7.21206	1.32376	6.67922	2.13789	11.8469	1.9995	5.21057	2.29272	24.002	3.04649	1.95638
10.0131	6.19359	2.98472	1.01023	2.53336	1.89585	1.63927	2.50453	6.76372	11.699	7.32299	0.607979	2.31018	1.984	7.23215	1.3239	6.66395	2.1481	11.8361	1.99992	5.19067	2.29423	24.2561	3.06243	1.95918
10.0198	6.18055	2.98575	1.00963	2.53861	1.90136	1.63613	2.50887	6.76324	11.7156	7.31384	0.608735	2.31238	1.98522	7.25202	1.32402	6.64913	2.15824	11.8256	2.00031	5.17112	2.29573	24.5095	3.07884	1.962
10.0264	6.16837	2.98674	1.00903	2.54399	1.90706	1.63315	2.51323	6.76273	11.7326	7.30514	0.609494	2.3146	1.98643	7.27164	1.32412	6.63479	2.16832	11.8154	2.00066	5.15192	2.29722	24.762	3.09569	1.96486
10.0331	6.15705	2.9877	1.0084	2.5495	1.91299	1.63032	2.51762	6.76219	11.7499	7.29687	0.61026	2.31682	1.98764	7.29101	1.3242	6.62091	2.17831	11.8057	2.00098	5.13307	2.2987	25.0137	3.11298	1.96775
10.0398	6.14659	2.98862	1.00777	2.55515	1.91913	1.62764	2.52203	6.76162	11.7677	7.28907	0.61103	2.31907	1.98886	7.31011	1.32427	6.60749	2.1882	11.7963	2.00125	5.11461	2.30017	25.2642	3.13071	1.97067
10.0464	6.13698	2.9895	1.00712	2.56093	1.92549	1.62511	2.52646	6.76101	11.7858	7.28172	0.611806	2.32134	1.99007	7.32893	1.32432	6.59453	2.19797	11.7873	2.00149	5.09653	2.30164	25.5133	3.14886	1.97362
10.0531	6.12821	2.99034	1.00646	2.56685	1.93209	1.62272	2.5309	6.76037	11.8042	7.27482	0.612589	2.32363	1.99128	7.34746	1.32436	6.58201	2.20762	11.7787	2.00169	5.07885	2.3031	25.761	3.16744	1.9766
10.0598	6.12028	2.99114	1.00579	2.57292	1.93892	1.62047	2.53536	6.75969	11.8231	7.2684	0.61338	2.32595	1.99249	7.36569	1.32438	6.56994	2.21712	11.7705	2.00185	5.06157	2.30455	26.0071	3.18644	1.97961
10.0664	6.11318	2.99189	1.00512	2.57914	1.94599	1.61836	2.53984	6.75896	11.8422	7.26244	0.614178	2.3283	1.9937	7.38359	1.32439	6.5583	2.22647	11.7627	2.00196	5.0447	2.30601	26.2513	3.20584	1.98264
10.0731	6.1069	2.9926	1.00444	2.58551	1.95331	1.61638	2.54433	6.75818	11.8617	7.25695	0.614985	2.33067	1.99491	7.40117	1.32439	6.54711	2.23565	11.7553	2.00204	5.02824	2.30746	26.4936	3.22564	1.9857
10.0798	6.10141	2.99327	1.00375	2.59202	1.96088	1.61453	2.54883	6.75735	11.8816	7.25193	0.615802	2.33308	1.99611	7.41841	1.32438	6.53633	2.24463	11.7482	2.00207	5.01222	2.30891	26.7338	3.24584	1.98878
10.0864	6.09672	2.99388	1.00306	2.5987	1.96871	1.61281	2.55334	6.75647	11.9017	7.24739	0.616629	2.33553	1.99731	7.4353	1.32435	6.52597	2.25342	11.7415	2.00205	4.99662	2.31035	26.9718	3.26642	1.99188
10.0931	6.0928	2.99445	1.00237	2.60553	1.97681	1.61121	2.55785	6.75554	11.9222	7.24332	0.617466	2.33801	1.99851	7.45182	1.32431	6.51603	2.26199	11.7352	2.00199	4.98145	2.3118	27.2073	3.28737	1.99501
10.0998	6.08965	2.99498	1.00167	2.61251	1.98517	1.60973	2.56238	6.75454	11.943	7.23972	0.618315	2.34054	1.9997	7.46798	1.32426	6.5065	2.27034	11.7293	2.00189	4.96672	2.31325	27.4402	3.30869	1.99815
10.1064	6.08724	2.99545	1.00097	2.61966	1.99381	1.60837	2.56692	6.75349	11.9641	7.23661	0.619176	2.34311	2.00089	7.48375	1.32421	6.49736	2.27844	11.7237	2.00174	4.95244	2.3147	27.6705	3.33038	2.00132
10.1131	6.08555	2.99587	1.00027	2.62696	2.00272	1.60713	2.57146	6.75238	11.9855	7.23397	0.62005	2.34572	2.00207	7.49915	1.32414	6.48863	2.28629	11.7185	2.00155	4.93859	2.31616	27.898	3.35242	2.0045
10.1198	6.08457	2.99625	0.999575	2.63443	2.01192	1.606	2.57601	6.7512	12.0071	7.23181	0.620939	2.34839	2.00325	7.51414	1.32407	6.48028	2.29387	11.7136	2.00131	4.92519	2.31762	28.1224	3.37479	2.00769
10.1264	6.08427	2.99657	0.99888	2.64206	2.02142	1.60497	2.58057	6.74996	12.0291	7.23013	0.621841	2.3511	2.00443	7.52874	1.32398	6.47231	2.30117	11.709	2.00102	4.91222	2.31909	28.3438	3.3975	2.0109
10.1331	6.08464	2.99684	0.998184	2.64985	2.0312	1.60406	2.58513	6.74866	12.0513	7.22893	0.62276	2.35387	2.00559	7.54293	1.32389	6.46471	2.30818	11.7048	2.00068	4.89971	2.32056	28.5619	3.42054	2.01411
10.1398	6.08566	2.99706	0.997496	2.65779	2.04128	1.60325	2.58969	6.74728	12.0738	7.2282	0.623694	2.3567	2.00676	7.55672	1.3238	6.45748	2.31489	11.7008	2.0003	4.88764	2.32204	28.7767	3.44389	2.01734
10.1464	6.08728	2.99723	0.996809	2.6659	2.05166	1.60254	2.59427	6.74585	12.0965	7.22795	0.624646	2.35959	2.00791	7.5701	1.32369	6.4506	2.32128	11.6972	1.99987	4.87601	2.32353	28.988	3.46754	2.02058
10.1531	6.0895	2.99734	0.996124	2.67417	2.06235	1.60194	2.59884	6.74434	12.1195	7.22818	0.625615	2.36254	2.00906	7.58307	1.32358	6.44408	2.32735	11.6939	1.99939	4.86481	2.32503	29.1958	3.49148	2.02382
10.1598	6.09229	2.9974	0.995445	2.6826	2.07335	1.60143	2.60343	6.74276	12.1427	7.22889	0.626602	2.36555	2.01021	7.59562	1.32347	6.43789	2.33309	11.6908	1.99887	4.85406	2.32654	29.3998	3.51571	2.02706
10.1664	6.09563	2.99741	0.994768	2.69118	2.08465	1.60101	2.60802	6.74111	12.1662	7.23007	0.62761	2.36863	2.01134	7.60777	1.32335	6.43204	2.33849	11.6881	1.9983	4.84374	2.32807	29.6	3.5402	2.03031
10.1731	6.09948	2.99737	0.994095	2.69991	2.09627	1.60069	2.61261	6.73939	12.1898	7.23173	0.628636	2.37178	2.01247	7.61951	1.32323	6.42651	2.34354	11.6856	1.99768	4.83385	2.3296	29.7963	3.56496	2.03356
10.1798	6.10383	2.99728	0.993428	2.7088	2.10821	1.60045	2.61722	6.7376	12.2138	7.23386	0.629685	2.37501	2.0136	7.63085	1.3231	6.42128	2.34823	11.6833	1.99702	4.82438	2.33116	29.9886	3.58996	2.0368
10.1864	6.10864	2.99713	0.992765	2.71783	2.12045	1.6003	2.62183	6.73573	12.2379	7.23645	0.630754	2.37831	2.01471	7.6418	1.32297	6.41637	2.35255	11.6813	1.99631	4.81533	2.33273	30.1768	3.6152	2.04004
10.1931	6.11388	2.99694	0.992104	2.72701	2.13302	1.60024	2.62646	6.73379	12.2622	7.23952	0.631846	2.38169	2.01582	7.65236	1.32284	6.41175	2.35651	11.6796	1.99555	4.8067	2.33432	30.3607	3.64065	2.04328
10.1998	6.11953	2.99669	0.991446	2.73634	2.1459	1.60026	2.63109	6.73177	12.2867	7.24304	0.632961	2.38515	2.01692	7.66254	1.3227	6.40742	2.3601	11.678	1.99475	4.79848	2.33592	30.5404	3.66632	2.04651
10.2064	6.12556	2.9964	0.990792	2.7458	2.1591	1.60036	2.63573	6.72969	12.3114	7.24703	0.634099	2.38869	2.01801	7.67235	1.32256	6.40336	2.36331	11.6767	1.9939	4.79067	2.33755	30.7156	3.69219	2.04973
10.2131	6.13193	2.99605	0.990142	2.7554	2.17261	1.60054	2.64039	6.72752	12.3363	7.25148	0.635262	2.39232	2.0191	7.68181	1.32242	6.39957	2.36613	11.6755	1.99301	4.78325	2.3392	30.8863	3.71824	2.05293
10.2198	6.13863	2.99566	0.989491	2.76513	2.18643	1.60079	2.64506	6.72528	12.3614	7.25638	0.636449	2.39603	2.02017	7.69092	1.32227	6.39604	2.36858	11.6746	1.99207	4.77622	2.34088	31.0525	3.74445	2.05612
10.2264	6.14563	2.99523	0.988841	2.77498	2.20056	1.60112	2.64974	6.72297	12.3866	7.26174	0.637663	2.39984	2.02124	7.69972	1.32212	6.39275	2.37064	11.6739	1.99109	4.76957	2.34257	31.2139	3.77083	2.0593
10.2331	6.15288	2.99475	0.98819	2.78496	2.21499	1.60152	2.65444	6.72058	12.412	7.26754	0.638903	2.40374	2.0223	7.7082	1.32197	6.3897	2.37231	11.6733	1.99006	4.7633	2.3443	31.3706	3.79735	2.06246
10.2398	6.16036	2.99422	0.987538	2.79505	2.22973	1.602	2.65916	6.71811	12.4376	7.27378	0.640168	2.40773	2.02335	7.71637	1.32182	6.38688	2.3736	11.6729	1.98899	4.75739	2.34605	31.5224	3.824	2.06561
10.2464	6.16805	2.99365	0.986884	2.80525	2.24476	1.60254	2.6639	6.71556	12.4634	7.28046	0.641462	2.41182	2.02439	7.72429	1.32167	6.38427	2.3745	11.6727	1.98788	4.75184	2.34783	31.6692	3.85076	2.06873
10.2531	6.1759	2.99304	0.986227	2.81555	2.26008	1.60315	2.66866	6.71294	12.4892	7.28758	0.642784	2.41601	2.02542	7.73195	1.32151	6.38187	2.37502	11.6726	1.98673	4.74665	2.34964	31.8111	3.87762	2.07182
10.2598	6.18391	2.9924	0.98556	2.82595	2.27569	1.60382	2.67344	6.71025	12.5153	7.29512	0.644133	2.4203	2.02644	7.73937	1.32135	6.37967	2.37516	11.6727	1.98554	4.7418	2.35148	31.9477	3.90456	2.0749
10.2664	6.19203	2.99171	0.984889	2.83645	2.29157	1.60456	2.67825	6.70747	12.5414	7.30308	0.645511	2.4247	2.02745	7.74657	1.32119	6.37765	2.37492	11.6729	1.98431	4.73728	2.35335	32.0792	3.93158	2.07795
10.2731	6.20024	2.99099	0.984211	2.84702	2.30773	1.60536	2.68308	6.70462	12.5677	7.31146	0.646919	2.42921	2.02845	7.75359	1.32103	6.37581	2.37431	11.6733	1.98304	4.73309	2.35526	32.2053	3.95865	2.08097
10.2798	6.20849	2.99023	0.98352	2.85767	2.32414	1.60622	2.68794	6.70169	12.5942	7.32025	0.648355	2.43382	2.02944	7.76044	1.32086	6.37414	2.37332	11.6738	1.98173	4.72922	2.3572	32.326	3.98577	2.08396
10.2864	6.21679	2.98944	0.98282	2.8684	2.3408	1.60714	2.69283	6.69868	12.6207	7.32944	0.649822	2.43854	2.03043	7.76714	1.3207	6.37262	2.37198	11.6745	1.98039	4.72565	2.35918	32.4411	4.01291	2.08692
10.2931	6.22509	2.98862	0.982103	2.87918	2.3577	1.60812	2.69776	6.6956	12.6474	7.33903	0.651318	2.44337	2.0314	7.77372	1.32052	6.37126	2.37028	11.6752	1.97901	4.72238	2.36119	32.5507	4.04007	2.08985
10.2998	6.23336	2.98777	0.981371	2.89002	2.37483	1.60916	2.70271	6.69245	12.6742	7.349	0.652846	2.44832	2.03236	7.78021	1.32035	6.37002	2.36822	11.6761	1.9776	4.7194	2.36325	32.6545	4.06721	2.09274
10.3064	6.24158	2.98689	0.980623	2.90091	2.39217	1.61025	2.70769	6.68921	12.7011	7.35936	0.654403	2.45339	2.03331	7.78663	1.32017	6.36892	2.36582	11.6771	1.97615	4.7167	2.36534	32.7525	4.09435	2.0956
10.3131	6.24973	2.98599	0.979852	2.91183	2.40971	1.6114	2.71272	6.68591	12.7281	7.37009	0.65599	2.45857	2.03425	7.793	1.31999	6.36795	2.36309	11.6783	1.97468	4.71427	2.36748	32.8446	4.12144	2.09843
10.3198	6.25778	2.98506	0.979063	2.92278	2.42745	1.6126	2.71778	6.68253	12.7552	7.38118	0.657609	2.46387	2.03517	7.79935	1.31981	6.36708	2.36003	11.6795	1.97317	4.71211	2.36965	32.9306	4.14849	2.10122
10.3264	6.2657	2.98411	0.978245	2.93376	2.44535	1.61386	2.72288	6.67907	12.7824	7.39263	0.659258	2.46929	2.03609	7.8057	1.31962	6.36632	2.35664	11.6809	1.97163	4.7102	2.37187	33.0104	4.17548	2.10397
10.3331	6.27347	2.98314	0.977406	2.94474	2.46341	1.61517	2.72802	6.67555	12.8097	7.40441	0.660939	2.47484	2.037	7.81208	1.31942	6.36564	2.35295	11.6824	1.97007	4.70853	2.37413	33.0839	4.20239	2.10668
10.3398	6.28108	2.98215	0.976535	2.95574	2.48162	1.61654	2.7332	6.67196	12.8371	7.41654	0.66265	2.48051	2.03789	7.81851	1.31922	6.36506	2.34896	11.684	1.96848	4.7071	2.37643	33.151	4.22921	2.10935
10.3464	6.28848	2.98114	0.975635	2.96672	2.49995	1.61796	2.73842	6.6683	12.8646	7.42899	0.664392	2.48631	2.03877	7.82501	1.31902	6.36455	2.34467	11.6857	1.96687	4.7059	2.37878	33.2115	4.25591	2.11198
10.3531	6.29568	2.98012	0.9747	2.97769	2.51838	1.61942	2.74369	6.66457	12.8922	7.44176	0.666164	2.49223	2.03964	7.8316	1.31881	6.36412	2.34011	11.6875	1.96524	4.70491	2.38118	33.2654	4.2825	2.11458
10.3598	6.30263	2.97908	0.973733	2.98863	2.53691	1.62094	2.74901	6.66077	12.9199	7.45482	0.667967	2.49828	2.0405	7.8383	1.31859	6.36375	2.33527	11.6894	1.96358	4.70414	2.38362	33.3125	4.30895	2.11712
10.3664	6.30934	2.97803	0.972729	2.99954	2.5555	1.62251	2.75437	6.65692	12.9477	7.46819	0.6698	2.50447	2.04134	7.84515	1.31837	6.36343	2.33018	11.6915	1.96191	4.70356	2.3861	33.3527	4.33524	2.11963
10.3731	6.31578	2.97697	0.971684	3.01041	2.57414	1.62413	2.75978	6.653	12.9755	7.48182	0.671663	2.51078	2.04218	7.85213	1.31815	6.36316	2.32484	11.6936	1.96021	4.70318	2.38863	33.3857	4.36138	2.1221
10.3798	6.32193	2.97589	0.970599	3.02123	2.59282	1.6258	2.76525	6.64902	13.0034	7.49574	0.673556	2.51723	2.043	7.8593	1.31791	6.36294	2.31926	11.6958	1.95851	4.70298	2.39121	33.4116	4.38733	2.12452
10.3864	6.32777	2.97481	0.969471	3.03198	2.6115	1.62753	2.77076	6.64499	13.0315	7.50991	0.675479	2.52381	2.04381	7.86665	1.31767	6.36275	2.31345	11.6982	1.95679	4.70296	2.39384	33.4301	4.41308	2.1269
10.3931	6.33329	2.97372	0.9683	3.04266	2.63017	1.6293	2.77633	6.64091	13.0595	7.52432	0.67743	2.53053	2.04461	7.87419	1.31742	6.3626	2.30743	11.7006	1.95506	4.7031	2.39651	33.4412	4.43863	2.12923
10.3998	6.33848	2.97261	0.967079	3.05327	2.64881	1.63112	2.78195	6.63677	13.0877	7.53896	0.67941	2.53738	2.0454	7.88196	1.31716	6.36246	2.3012	11.7031	1.95332	4.70341	2.39923	33.4446	4.46396	2.13153
10.4064	6.34333	2.9715	0.965812	3.06378	2.66739	1.63299	2.78762	6.6326	13.116	7.55383	0.681419	2.54438	2.04617	7.88995	1.3169	6.36235	2.29478	11.7058	1.95157	4.70387	2.40199	33.4404	4.48905	2.13377
10.4131	6.34782	2.97039	0.964491	3.07419	2.6859	1.63491	2.79335	6.62837	13.1443	7.5689	0.683456	2.55151	2.04693	7.89817	1.31663	6.36225	2.28818	11.7085	1.94982	4.70448	2.4048	33.4282	4.51388	2.13598
10.4198	6.35194	2.96926	0.963122	3.0845	2.70429	1.63688	2.79915	6.62412	13.1727	7.58416	0.68552	2.55877	2.04768	7.90664	1.31635	6.36217	2.28141	11.7113	1.94806	4.70522	2.40765	33.4082	4.53845	2.13814
10.4264	6.35567	2.96813	0.9617	3.09468	2.72257	1.6389	2.80499	6.61982	13.2012	7.59959	0.68761	2.56619	2.04842	7.91535	1.31606	6.36209	2.27448	11.7142	1.94631	4.7061	2.41056	33.38	4.56275	2.14026
10.4331	6.35903	2.96699	0.960222	3.10474	2.7407	1.64097	2.8109	6.61549	13.2298	7.61519	0.689727	2.57374	2.04915	7.92432	1.31576	6.36201	2.26741	11.7172	1.94455	4.70709	2.4135	33.3437	4.58675	2.14233
10.4398	6.36198	2.96585	0.958688	3.11466	2.75867	1.64309	2.81687	6.61112	13.2584	7.63094	0.69187	2.58143	2.04986	7.93353	1.31545	6.36194	2.26019	11.7203	1.9428	4.70821	2.41649	33.2991	4.61044	2.14437
10.4464	6.36454	2.96469	0.957102	3.12444	2.77643	1.64525	2.8229	6.60674	13.2871	7.64683	0.694038	2.58927	2.05057	7.94301	1.31514	6.36186	2.25285	11.7234	1.94105	4.70943	2.41952	33.2461	4.63381	2.14635
10.4531	6.36669	2.96353	0.955453	3.13406	2.79399	1.64747	2.82899	6.60234	13.316	7.66283	0.69623	2.59726	2.05126	7.95274	1.31481	6.36177	2.2454	11.7266	1.93932	4.71076	2.4226	33.1848	4.65685	2.1483
10.4598	6.36842	2.96235	0.95375	3.14352	2.81129	1.64974	2.83514	6.59792	13.3449	7.67894	0.698446	2.60539	2.05194	7.96272	1.31448	6.36167	2.23783	11.7299	1.93759	4.71219	2.42572	33.1151	4.67954	2.15021
10.4664	6.36974	2.96117	0.951988	3.1528	2.82834	1.65206	2.84136	6.59348	13.3738	7.69514	0.700686	2.61366	2.05261	7.97294	1.31413	6.36156	2.23018	11.7333	1.93588	4.7137	2.42887	33.0368	4.70187	2.15207
10.4731	6.37065	2.95998	0.950169	3.1619	2.8451	1.65443	2.84764	6.58905	13.4029	7.71141	0.702948	2.62208	2.05327	7.98338	1.31378	6.36143	2.22244	11.7367	1.93418	4.71531	2.43207	32.9501	4.72382	2.15389
10.4798	6.37113	2.95877	0.948287	3.17082	2.86154	1.65686	2.85399	6.5846	13.4321	7.72774	0.705232	2.63066	2.05391	7.99407	1.31341	6.36129	2.21462	11.7402	1.9325	4.71699	2.43531	32.8549	4.74538	2.15568
10.4864	6.3712	2.95755	0.946345	3.17953	2.87766	1.65933	2.86041	6.58016	13.4613	7.74413	0.707537	2.63937	2.05455	8.00496	1.31304	6.36112	2.20673	11.7438	1.93084	4.71874	2.43858	32.7513	4.76654	2.15742
10.4931	6.37083	2.95631	0.944349	3.18803	2.89341	1.66185	2.86689	6.57572	13.4906	7.76054	0.709862	2.64824	2.05518	8.01606	1.31266	6.36094	2.19879	11.7474	1.92921	4.72057	2.44189	32.6392	4.78728	2.15912
10.4998	6.37007	2.95506	0.942291	3.19633	2.90878	1.66443	2.87344	6.57129	13.5201	7.77696	0.712208	2.65726	2.0558	8.02733	1.31226	6.36073	2.1908	11.751	1.9276	4.72245	2.44523	32.5188	4.80759	2.16078
10.5064	6.36887	2.95379	0.940178	3.2044	2.92376	1.66706	2.88006	6.56687	13.5496	7.79339	0.714573	2.66643	2.05641	8.03878	1.31186	6.36051	2.18277	11.7546	1.92601	4.72439	2.44861	32.3902	4.82745	2.16241
10.5131	6.36726	2.9525	0.938004	3.21223	2.93831	1.66974	2.88675	6.56247	13.5792	7.80981	0.716957	2.67575	2.057	8.05037	1.31145	6.36025	2.17471	11.7583	1.92446	4.72638	2.45202	32.2535	4.84685	2.164
10.5198	6.36524	2.95118	0.935772	3.21983	2.95241	1.67247	2.89351	6.5581	13.609	7.82619	0.719357	2.68523	2.05759	8.06209	1.31103	6.35997	2.16662	11.762	1.92294	4.72842	2.45545	32.1088	4.86579	2.16555
10.5264	6.36281	2.94985	0.933486	3.22718	2.96605	1.67526	2.90034	6.55374	13.6388	7.84253	0.721776	2.69485	2.05817	8.07392	1.3106	6.35968	2.15852	11.7657	1.92146	4.7305	2.45892	31.9563	4.88423	2.16707
10.5331	6.35998	2.94848	0.931145	3.23427	2.9792	1.6781	2.90724	6.54942	13.6688	7.85882	0.72421	2.70463	2.05874	8.08582	1.31017	6.35934	2.15041	11.7694	1.92001	4.73261	2.46242	31.7961	4.90217	2.16855
10.5398	6.35675	2.94709	0.928748	3.24111	2.99184	1.68099	2.91421	6.54514	13.6988	7.87503	0.72666	2.71457	2.0593	8.09778	1.30972	6.35899	2.1423	11.7731	1.91861	4.73475	2.46593	31.6285	4.91961	2.16999
10.5464	6.35313	2.94566	0.926302	3.24767	3.00396	1.68394	2.92125	6.54089	13.729	7.89115	0.729126	2.72465	2.05985	8.10977	1.30927	6.35861	2.13419	11.7768	1.91724	4.73692	2.46948	31.4537	4.93651	2.17141
10.5531	6.34913	2.94421	0.923801	3.25397	3.01554	1.68694	2.92837	6.53668	13.7593	7.90719	0.731605	2.73489	2.06039	8.12176	1.30881	6.3582	2.1261	11.7805	1.91593	4.73911	2.47304	31.272	4.95288	2.17279
10.5598	6.34474	2.94272	0.921254	3.25997	3.02656	1.68999	2.93555	6.53252	13.7898	7.9231	0.734098	2.74529	2.06092	8.13372	1.30834	6.35777	2.11802	11.7841	1.91466	4.74131	2.47662	31.0836	4.9687	2.17413
10.5664	6.33999	2.94119	0.918656	3.26569	3.037	1.6931	2.9428	6.52841	13.8203	7.9389	0.736605	2.75584	2.06145	8.14562	1.30787	6.35731	2.10996	11.7876	1.91344	4.74353	2.48022	30.8887	4.98396	2.17545
10.5731	6.33487	2.93962	0.91601	3.27112	3.04684	1.69626	2.95013	6.52435	13.851	7.95455	0.739123	2.76654	2.06196	8.15743	1.30739	6.35682	2.10193	11.7911	1.91227	4.74575	2.48384	30.6878	4.99864	2.17674
10.5798	6.3294	2.93801	0.913324	3.27624	3.05608	1.69949	2.95753	6.52035	13.8819	7.97006	0.741654	2.7774	2.06246	8.16912	1.3069	6.35631	2.09394	11.7946	1.91116	4.74797	2.48748	30.481	5.01273	2.178
10.5864	6.32359	2.93636	0.910591	3.28106	3.0647	1.70276	2.96499	6.51641	13.9129	7.98541	0.744196	2.78841	2.06296	8.18065	1.30641	6.35578	2.08599	11.7979	1.9101	4.75019	2.49112	30.2687	5.02623	2.17923
10.5931	6.31745	2.93466	0.907819	3.28557	3.07268	1.70609	2.97252	6.51253	13.944	8.00058	0.746748	2.79957	2.06345	8.19199	1.30592	6.35522	2.07807	11.8011	1.90911	4.75241	2.49478	30.0513	5.03911	2.18043
10.5998	6.31098	2.93291	0.905009	3.28976	3.08002	1.70948	2.98012	6.50871	13.9753	8.01558	0.74931	2.81089	2.06392	8.2031	1.30542	6.35464	2.07021	11.8042	1.90817	4.7546	2.49844	29.829	5.05139	2.18161
10.6064	6.30419	2.93111	0.902159	3.29363	3.08671	1.71292	2.98779	6.50497	14.0067	8.03037	0.751881	2.82236	2.06439	8.21396	1.30492	6.35403	2.0624	11.8072	1.9073	4.75679	2.50211	29.6022	5.06304	2.18276
10.6131	6.2971	2.92926	0.899278	3.29718	3.09272	1.71642	2.99552	6.50129	14.0383	8.04497	0.754461	2.83397	2.06485	8.22453	1.30441	6.3534	2.05464	11.8101	1.9065	4.75895	2.50578	29.3712	5.07405	2.18389
10.6198	6.28972	2.92735	0.896364	3.3004	3.09807	1.71997	3.00332	6.49769	14.0701	8.05935	0.757049	2.84574	2.06529	8.23477	1.3039	6.35276	2.04695	11.8128	1.90576	4.76109	2.50946	29.1364	5.08442	2.18499
10.6264	6.28205	2.92539	0.893418	3.3033	3.10273	1.72359	3.01117	6.49416	14.1021	8.07351	0.759645	2.85765	2.06573	8.24465	1.3034	6.35209	2.03932	11.8153	1.9051	4.76319	2.51314	28.8981	5.09415	2.18607
10.6331	6.27412	2.92337	0.890444	3.30585	3.10672	1.72726	3.01909	6.49072	14.1342	8.08744	0.762247	2.86971	2.06616	8.25412	1.30289	6.35141	2.03175	11.8177	1.90451	4.76527	2.51682	28.6566	5.10321	2.18714
10.6398	6.26592	2.9213	0.887445	3.30808	3.11001	1.73098	3.02706	6.48735	14.1666	8.10113	0.764856	2.88191	2.06657	8.26317	1.30238	6.3507	2.02426	11.8199	1.90399	4.7673	2.52049	28.4124	5.11162	2.18818
10.6464	6.25746	2.91916	0.88442	3.30997	3.11261	1.73477	3.03509	6.48406	14.1991	8.11457	0.767471	2.89425	2.06698	8.27176	1.30187	6.34998	2.01683	11.8218	1.90354	4.7693	2.52416	28.1656	5.11937	2.1892
10.6531	6.24878	2.91695	0.881376	3.31153	3.11452	1.73861	3.04318	6.48086	14.2318	8.12777	0.770092	2.90673	2.06737	8.27984	1.30136	6.34925	2.00948	11.8236	1.90318	4.77125	2.52782	27.9167	5.12644	2.19021
10.6598	6.23986	2.91469	0.878313	3.31275	3.11574	1.74251	3.05131	6.47774	14.2647	8.1407	0.772717	2.91935	2.06775	8.28741	1.30086	6.34851	2.00222	11.8251	1.9029	4.77314	2.53148	27.6659	5.13285	2.1912
10.6664	6.23073	2.91236	0.875231	3.31363	3.11627	1.74647	3.05948	6.47471	14.2979	8.15337	0.775346	2.93209	2.06811	8.2944	1.30036	6.34775	1.99503	11.8263	1.90269	4.77498	2.53512	27.4136	5.13859	2.19217
10.6731	6.2214	2.90997	0.872136	3.31418	3.11611	1.75048	3.0677	6.47177	14.3312	8.16576	0.777979	2.94496	2.06847	8.3008	1.29986	6.34698	1.98792	11.8273	1.90257	4.77677	2.53875	27.1601	5.14365	2.19313
10.6798	6.21187	2.90751	0.869027	3.3144	3.11527	1.75456	3.07596	6.46892	14.3647	8.17788	0.780616	2.95796	2.06881	8.30658	1.29937	6.3462	1.98089	11.828	1.90254	4.77849	2.54236	26.9056	5.14804	2.19408
10.6864	6.20216	2.90499	0.865907	3.31429	3.11376	1.75869	3.08425	6.46615	14.3985	8.18972	0.783254	2.97107	2.06913	8.31171	1.29888	6.34542	1.97396	11.8283	1.90259	4.78015	2.54596	26.6504	5.15176	2.19501
10.6931	6.19229	2.90239	0.862776	3.31385	3.11158	1.76287	3.09257	6.46348	14.4325	8.20127	0.785895	2.98429	2.06944	8.31616	1.2984	6.34463	1.96711	11.8284	1.90273	4.78174	2.54954	26.3948	5.15481	2.19593
10.6998	6.18225	2.89974	0.859641	3.3131	3.10875	1.76712	3.10092	6.4609	14.4667	8.21253	0.788537	2.99762	2.06974	8.31993	1.29793	6.34383	1.96035	11.8282	1.90296	4.78325	2.5531	26.1391	5.1572	2.19685
10.7064	6.17208	2.89701	0.856499	3.31202	3.10526	1.77142	3.10929	6.45842	14.5011	8.22351	0.79118	3.01105	2.07002	8.32295	1.29747	6.34303	1.95368	11.8276	1.90327	4.7847	2.55664	25.8836	5.15892	2.19775
10.7131	6.16176	2.89422	0.853357	3.31063	3.10114	1.77578	3.11767	6.45602	14.5358	8.23419	0.793824	3.02457	2.07028	8.32523	1.29701	6.34223	1.94711	11.8267	1.90368	4.78606	2.56016	25.6283	5.15999	2.19865
10.7198	6.15132	2.89136	0.85021	3.30894	3.0964	1.7802	3.12606	6.45372	14.5707	8.24457	0.796468	3.03819	2.07053	8.32676	1.29656	6.34143	1.94063	11.8254	1.90418	4.78734	2.56365	25.3737	5.16041	2.19953
10.7264	6.14076	2.88844	0.847065	3.30694	3.09105	1.78467	3.13447	6.45152	14.6058	8.25466	0.79911	3.05188	2.07076	8.32748	1.29613	6.34063	1.93424	11.8237	1.90478	4.78854	2.56712	25.1199	5.16018	2.20042
10.7331	6.1301	2.88546	0.843921	3.30465	3.08511	1.7892	3.14286	6.4494	14.6411	8.26445	0.801751	3.06565	2.07098	8.32742	1.2957	6.33983	1.92796	11.8217	1.90547	4.78965	2.57056	24.8671	5.15932	2.20129
10.7398	6.11935	2.88241	0.840783	3.30208	3.0786	1.79379	3.15125	6.44738	14.6767	8.27393	0.80439	3.07948	2.07117	8.32654	1.29528	6.33905	1.92177	11.8192	1.90625	4.79067	2.57397	24.6155	5.15783	2.20217
10.7464	6.10852	2.87929	0.837648	3.29923	3.07154	1.79842	3.15963	6.44545	14.7124	8.28312	0.807026	3.09337	2.07135	8.32483	1.29488	6.33826	1.91567	11.8163	1.90713	4.79159	2.57735	24.3654	5.15572	2.20304
10.7531	6.09761	2.87612	0.834523	3.29611	3.06394	1.80312	3.16799	6.44361	14.7484	8.29201	0.80966	3.10731	2.07151	8.32229	1.2945	6.33749	1.90968	11.8131	1.90811	4.79243	2.5807	24.1168	5.153	2.20391
10.7598	6.08664	2.87289	0.831404	3.29273	3.05582	1.80786	3.17632	6.44187	14.7846	8.30059	0.812289	3.12128	2.07165	8.31891	1.29412	6.33672	1.90379	11.8094	1.90919	4.79316	2.58401	23.87	5.14969	2.20478
10.7664	6.07562	2.8696	0.828297	3.28911	3.04721	1.81266	3.18461	6.44021	14.821	8.30888	0.814913	3.13529	2.07177	8.31467	1.29376	6.33597	1.898	11.8053	1.91036	4.7938	2.5873	23.6252	5.14579	2.20565
10.7731	6.06456	2.86626	0.825199	3.28524	3.03812	1.81751	3.19287	6.43865	14.8576	8.31688	0.817532	3.14932	2.07188	8.30959	1.29342	6.33522	1.89232	11.8007	1.91163	4.79433	2.59055	23.3824	5.14131	2.20652
10.7798	6.05347	2.86286	0.822115	3.28114	3.0286	1.82242	3.20108	6.43717	14.8944	8.32457	0.820144	3.16336	2.07196	8.30365	1.29309	6.3345	1.88674	11.7957	1.91299	4.79477	2.59376	23.1419	5.13627	2.20739
10.7864	6.04234	2.85941	0.819043	3.27683	3.01864	1.82737	3.20922	6.43577	14.9313	8.33197	0.82275	3.1774	2.07203	8.29687	1.29278	6.33379	1.88126	11.7903	1.91446	4.7951	2.59694	22.9037	5.13069	2.20826
10.7931	6.03121	2.85591	0.815984	3.2723	3.00829	1.83237	3.21731	6.43446	14.9685	8.33907	0.825349	3.19144	2.07207	8.28925	1.29248	6.33309	1.87588	11.7845	1.91603	4.79532	2.60008	22.6681	5.12457	2.20914
10.7998	6.02007	2.85236	0.812944	3.26759	2.99756	1.83743	3.22533	6.43324	15.0057	8.34588	0.827938	3.20545	2.0721	8.28078	1.29221	6.33242	1.87062	11.7781	1.91769	4.79544	2.60318	22.4352	5.11793	2.21003
10.8064	6.00893	2.84877	0.80992	3.26268	2.98648	1.84252	3.23326	6.4321	15.0431	8.35241	0.830519	3.21944	2.0721	8.27148	1.29195	6.33177	1.86545	11.7714	1.91945	4.79546	2.60625	22.205	5.11078	2.21092
10.8131	5.9978	2.84514	0.806912	3.25761	2.97508	1.84767	3.24111	6.43103	15.0806	8.35864	0.833089	3.23339	2.07209	8.26137	1.29172	6.33113	1.8604	11.7642	1.92131	4.79537	2.60928	21.9777	5.10315	2.21181
10.8198	5.98668	2.84147	0.803922	3.25238	2.96338	1.85286	3.24887	6.43004	15.1183	8.36459	0.835649	3.24729	2.07205	8.25046	1.2915	6.33052	1.85545	11.7566	1.92327	4.79517	2.61227	21.7533	5.09504	2.21272
10.8264	5.9756	2.83777	0.800954	3.24699	2.95141	1.85809	3.25652	6.42913	15.156	8.37026	0.838197	3.26114	2.072	8.23876	1.29131	6.32993	1.85061	11.7485	1.92532	4.79486	2.61522	21.5321	5.08647	2.21363
10.8331	5.96454	2.83404	0.798003	3.24147	2.93919	1.86337	3.26406	6.42828	15.1938	8.37566	0.840731	3.27491	2.07193	8.22627	1.29114	6.32937	1.84588	11.7401	1.92747	4.79445	2.61814	21.3141	5.07747	2.21455
10.8398	5.95353	2.83027	0.795073	3.23583	2.92675	1.86869	3.27148	6.4275	15.2316	8.38078	0.843252	3.28861	2.07184	8.21304	1.29099	6.32883	1.84126	11.7311	1.92972	4.79393	2.62102	21.0993	5.06803	2.21549
10.8464	5.94257	2.82649	0.792164	3.23008	2.91412	1.87404	3.27877	6.4268	15.2695	8.38562	0.845759	3.30222	2.07173	8.19908	1.29086	6.32832	1.83675	11.7218	1.93206	4.7933	2.62385	20.8879	5.0582	2.21643
10.8531	5.93166	2.82268	0.789277	3.22422	2.90132	1.87944	3.28593	6.42616	15.3074	8.39019	0.84825	3.31574	2.0716	8.18441	1.29076	6.32784	1.83235	11.7121	1.9345	4.79257	2.62666	20.6799	5.04797	2.21738
10.8598	5.92082	2.81885	0.786413	3.21828	2.88838	1.88487	3.29295	6.42557	15.3452	8.39451	0.850725	3.32915	2.07145	8.16905	1.29068	6.32739	1.82806	11.702	1.93703	4.79174	2.62943	20.4755	5.03736	2.21835
10.8664	5.91003	2.81501	0.78357	3.21226	2.87531	1.89034	3.29982	6.42504	15.383	8.39857	0.853182	3.34244	2.07129	8.15303	1.29063	6.32696	1.82388	11.6916	1.93966	4.7908	2.63215	20.2746	5.0264	2.21933
10.8731	5.89933	2.81115	0.780749	3.20617	2.86216	1.89584	3.30653	6.42457	15.4207	8.40236	0.855621	3.35561	2.07111	8.13639	1.2906	6.32657	1.81981	11.6808	1.94237	4.78977	2.63485	20.0774	5.01511	2.22033
10.8798	5.88871	2.80729	0.777953	3.20004	2.84893	1.90138	3.31308	6.42414	15.4584	8.40591	0.85804	3.36866	2.07091	8.11914	1.2906	6.3262	1.81586	11.6696	1.94518	4.78863	2.63751	19.8838	5.0035	2.22134
10.8864	5.87817	2.80343	0.77518	3.19386	2.83565	1.90695	3.31945	6.42375	15.4959	8.4092	0.860438	3.38156	2.07069	8.10132	1.29063	6.32587	1.81201	11.6581	1.94807	4.7874	2.64013	19.694	4.99158	2.22236
10.8931	5.86772	2.79957	0.772429	3.18765	2.82235	1.91255	3.32565	6.42342	15.5332	8.41226	0.862815	3.39432	2.07046	8.08295	1.29069	6.32557	1.80829	11.6463	1.95105	4.78608	2.64273	19.508	4.97938	2.2234
10.8998	5.85737	2.79571	0.769705	3.18142	2.80904	1.91817	3.33167	6.42312	15.5704	8.41506	0.865169	3.40693	2.07022	8.06408	1.29077	6.32531	1.80467	11.6342	1.95412	4.78466	2.64529	19.3258	4.9669	2.22446
10.9064	5.84713	2.79186	0.767002	3.17518	2.79575	1.92383	3.33749	6.42285	15.6074	8.41763	0.867499	3.41938	2.06996	8.04472	1.29089	6.32507	1.80117	11.6218	1.95727	4.78315	2.64782	19.1475	4.95418	2.22553
10.9131	5.83699	2.78802	0.764323	3.16894	2.7825	1.9295	3.34312	6.42262	15.6441	8.41998	0.869804	3.43167	2.06968	8.02492	1.29103	6.32487	1.79779	11.6092	1.96051	4.78156	2.65032	18.9731	4.94123	2.22662
10.9198	5.82697	2.78419	0.76167	3.16271	2.7693	1.93521	3.34855	6.42242	15.6806	8.42209	0.872081	3.44379	2.0694	8.00471	1.29121	6.3247	1.79452	11.5963	1.96382	4.77989	2.6528	18.8026	4.92807	2.22773
10.9264	5.81705	2.78039	0.75904	3.15649	2.75617	1.94094	3.35377	6.42224	15.7167	8.42398	0.874332	3.45574	2.0691	7.98412	1.29142	6.32458	1.79137	11.5832	1.96722	4.77813	2.65525	18.6361	4.9147	2.22886
10.9331	5.80726	2.7766	0.756434	3.1503	2.74314	1.94668	3.35878	6.42207	15.7526	8.42566	0.876553	3.46752	2.06878	7.96318	1.29166	6.32448	1.78833	11.57	1.97069	4.7763	2.65767	18.4735	4.90115	2.23001
10.9398	5.7976	2.77284	0.753853	3.14415	2.73021	1.95245	3.36358	6.42193	15.7881	8.42712	0.878745	3.47911	2.06846	7.94193	1.29194	6.32441	1.78542	11.5565	1.97424	4.7744	2.66007	18.3148	4.88744	2.23118
10.9464	5.78806	2.76911	0.751294	3.13804	2.7174	1.95824	3.36816	6.4218	15.8231	8.42836	0.880905	3.49052	2.06813	7.92041	1.29225	6.32439	1.78262	11.5429	1.97785	4.77243	2.66245	18.1602	4.87357	2.23237
10.9531	5.77866	2.76541	0.748759	3.13197	2.70473	1.96404	3.37251	6.42167	15.8578	8.4294	0.883031	3.50175	2.06778	7.89865	1.29259	6.3244	1.77993	11.5292	1.98154	4.7704	2.66481	18.0095	4.85957	2.23358
10.9598	5.76939	2.76175	0.746247	3.12597	2.69221	1.96987	3.37665	6.42155	15.8921	8.43025	0.885124	3.51279	2.06743	7.87667	1.29298	6.32444	1.77737	11.5154	1.9853	4.76831	2.66716	17.8628	4.84546	2.23481
10.9664	5.76026	2.75812	0.743761	3.12002	2.67984	1.9757	3.38055	6.42144	15.9258	8.43089	0.88718	3.52364	2.06707	7.85452	1.29339	6.32452	1.77493	11.5015	1.98913	4.76616	2.66948	17.72	4.83124	2.23606
10.9731	5.75128	2.75453	0.741297	3.11414	2.66765	1.98155	3.38423	6.42132	15.959	8.43134	0.8892	3.53431	2.0667	7.83223	1.29385	6.32464	1.7726	11.4876	1.99301	4.76396	2.6718	17.5812	4.81693	2.23733
10.9798	5.74244	2.75099	0.738856	3.10834	2.65563	1.98741	3.38767	6.4212	15.9918	8.4316	0.891181	3.54479	2.06632	7.80982	1.29434	6.32479	1.7704	11.4736	1.99696	4.76172	2.6741	17.4464	4.80254	2.23862
10.9864	5.73375	2.7475	0.736435	3.10261	2.6438	1.99329	3.39087	6.42107	16.0239	8.43169	0.893122	3.55508	2.06594	7.78735	1.29488	6.32498	1.76832	11.4596	2.00097	4.75944	2.67639	17.3154	4.78809	2.23994
10.9931	5.72521	2.74405	0.734039	3.09697	2.63217	1.99917	3.39385	6.42093	16.0555	8.4316	0.895021	3.56519	2.06556	7.76482	1.29545	6.3252	1.76636	11.4456	2.00503	4.75712	2.67867	17.1884	4.77358	2.24128
10.9998	5.71683	2.74065	0.731665	3.09141	2.62074	2.00506	3.39659	6.42077	16.0865	8.43132	0.896877	3.57511	2.06516	7.74228	1.29606	6.32546	1.76452	11.4317	2.00915	4.75477	2.68095	17.0652	4.75904	2.24264
11.0065	5.70859	2.73731	0.729313	3.08594	2.60951	2.01097	3.39909	6.4206	16.1168	8.43089	0.898688	3.58484	2.06477	7.71975	1.29672	6.32575	1.7628	11.4178	2.01331	4.7524	2.68322	16.9458	4.74448	2.24402
11.0131	5.70052	2.73402	0.72698	3.08056	2.5985	2.01687	3.40135	6.42041	16.1465	8.43029	0.900453	3.5944	2.06437	7.69726	1.29742	6.32609	1.76121	11.404	2.01752	4.75001	2.68549	16.8303	4.72989	2.24542
11.0198	5.69262	2.73079	0.72467	3.07527	2.5877	2.02279	3.40339	6.4202	16.1756	8.42954	0.902168	3.60378	2.06397	7.67485	1.29816	6.32645	1.75974	11.3903	2.02178	4.74761	2.68776	16.7185	4.7153	2.24685
11.0265	5.68486	2.72762	0.722381	3.07008	2.57712	2.02871	3.40518	6.41996	16.2039	8.42863	0.903836	3.61298	2.06357	7.65253	1.29894	6.32686	1.7584	11.3767	2.02609	4.7452	2.69003	16.6104	4.70072	2.2483
11.0331	5.67728	2.72451	0.72011	3.06499	2.56676	2.03463	3.40674	6.4197	16.2315	8.42757	0.90545	3.62201	2.06317	7.63034	1.29976	6.3273	1.75718	11.3632	2.03042	4.74278	2.69231	16.506	4.68614	2.24977
11.0398	5.66986	2.72145	0.717863	3.06	2.55662	2.04056	3.40806	6.41942	16.2584	8.42637	0.907013	3.63087	2.06277	7.6083	1.30063	6.32777	1.75609	11.3499	2.0348	4.74038	2.69459	16.4052	4.67159	2.25126
11.0465	5.6626	2.71847	0.715634	3.05511	2.5467	2.04649	3.40916	6.4191	16.2846	8.42503	0.908519	3.63956	2.06236	7.58643	1.30155	6.32829	1.75512	11.3367	2.03921	4.73799	2.69687	16.308	4.65706	2.25278
11.0531	5.65551	2.71554	0.713423	3.05031	2.537	2.05242	3.41002	6.41875	16.31	8.42356	0.90997	3.64809	2.06196	7.56477	1.30251	6.32884	1.75429	11.3238	2.04365	4.7356	2.69917	16.2144	4.64256	2.25432
11.0598	5.64858	2.71268	0.711232	3.04562	2.52751	2.05836	3.41065	6.41838	16.3346	8.42196	0.911362	3.65646	2.06157	7.54332	1.30352	6.32943	1.75357	11.311	2.04812	4.73325	2.70147	16.1242	4.62811	2.25588
11.0665	5.64183	2.70988	0.70906	3.04103	2.51825	2.06429	3.41105	6.41797	16.3585	8.42024	0.912694	3.66468	2.06117	7.52212	1.30457	6.33005	1.75299	11.2985	2.05261	4.73092	2.70379	16.0374	4.6137	2.25747
11.0731	5.63524	2.70715	0.706905	3.03653	2.5092	2.07023	3.41123	6.41752	16.3815	8.41841	0.913964	3.67274	2.06078	7.50118	1.30567	6.33071	1.75254	11.2862	2.05713	4.72862	2.70612	15.9539	4.59934	2.25907
11.0798	5.62882	2.70449	0.704768	3.03214	2.50036	2.07616	3.41118	6.41705	16.4038	8.41646	0.91517	3.68067	2.06039	7.48053	1.30682	6.33141	1.75221	11.2742	2.06166	4.72637	2.70847	15.8738	4.58504	2.2607
11.0865	5.62257	2.70189	0.702648	3.02785	2.49173	2.08209	3.41091	6.41653	16.4253	8.41441	0.916312	3.68845	2.06001	7.46017	1.30801	6.33214	1.75202	11.2624	2.06621	4.72417	2.71083	15.7969	4.57079	2.26235
11.0931	5.61649	2.69935	0.700547	3.02365	2.4833	2.08802	3.41042	6.41599	16.4459	8.41226	0.917386	3.6961	2.05962	7.44012	1.30925	6.33292	1.75195	11.2509	2.07078	4.72202	2.71321	15.7232	4.55661	2.26403
11.0998	5.61058	2.69688	0.698461	3.01955	2.47508	2.09394	3.40971	6.41541	16.4658	8.41002	0.918392	3.70361	2.05925	7.42042	1.31054	6.33373	1.75202	11.2397	2.07535	4.71993	2.71561	15.6526	4.54249	2.26572
11.1065	5.60483	2.69447	0.696392	3.01554	2.46705	2.09986	3.40879	6.41479	16.4848	8.40768	0.919327	3.711	2.05888	7.40106	1.31187	6.33459	1.75222	11.2288	2.07993	4.7179	2.71803	15.585	4.52843	2.26744
11.1131	5.59924	2.69213	0.69434	3.01163	2.45921	2.10578	3.40765	6.41414	16.503	8.40527	0.920192	3.71826	2.05852	7.38207	1.31326	6.33548	1.75255	11.2183	2.08452	4.71595	2.72046	15.5204	4.51444	2.26917
11.1198	5.59383	2.68986	0.692303	3.0078	2.45156	2.11169	3.40631	6.41346	16.5205	8.40278	0.920982	3.72541	2.05816	7.36346	1.31469	6.33641	1.75301	11.208	2.08911	4.71408	2.72292	15.4587	4.50052	2.27094
11.1265	5.58858	2.68764	0.69028	3.00407	2.44408	2.1176	3.40476	6.41274	16.5371	8.40021	0.921697	3.73244	2.05782	7.34524	1.31616	6.33738	1.75361	11.1981	2.0937	4.71228	2.72541	15.3999	4.48666	2.27272
11.1331	5.58349	2.68548	0.688275	3.00043	2.43679	2.1235	3.403	6.412	16.5529	8.39759	0.922337	3.73936	2.05747	7.32742	1.31769	6.3384	1.75434	11.1885	2.09829	4.71059	2.72791	15.3438	4.47288	2.27452
11.1398	5.57857	2.68339	0.686283	2.99686	2.42966	2.12939	3.40105	6.41122	16.5678	8.39491	0.922899	3.74618	2.05714	7.31002	1.31926	6.33946	1.75521	11.1792	2.10288	4.70899	2.73044	15.2904	4.45916	2.27635
11.1465	5.5738	2.68135	0.684305	2.99339	2.4227	2.13527	3.39889	6.4104	16.582	8.39218	0.923382	3.7529	2.05681	7.29304	1.32087	6.34056	1.75621	11.1704	2.10745	4.70749	2.73299	15.2397	4.44551	2.27819
11.1531	5.5692	2.67937	0.682343	2.98999	2.4159	2.14115	3.39654	6.40956	16.5954	8.38939	0.923785	3.75952	2.0565	7.2765	1.32253	6.3417	1.75734	11.1618	2.11202	4.7061	2.73557	15.1915	4.43193	2.28006
11.1598	5.56476	2.67745	0.680394	2.98668	2.40925	2.14701	3.394	6.4087	16.6081	8.38658	0.924106	3.76605	2.05619	7.2604	1.32424	6.34289	1.75861	11.1537	2.11658	4.70483	2.73816	15.1458	4.41841	2.28195
11.1665	5.56047	2.67558	0.678458	2.98344	2.40275	2.15287	3.39127	6.4078	16.6199	8.38373	0.924346	3.77249	2.05589	7.24475	1.32599	6.34412	1.76002	11.1459	2.12112	4.70368	2.74079	15.1026	4.40497	2.28386
11.1731	5.55633	2.67377	0.676538	2.98029	2.39639	2.15872	3.38836	6.40687	16.631	8.38085	0.924501	3.77884	2.0556	7.22956	1.32778	6.34541	1.76157	11.1384	2.12565	4.70266	2.74343	15.0617	4.39158	2.28579
11.1798	5.55235	2.67201	0.674627	2.9772	2.39018	2.16455	3.38526	6.40591	16.6414	8.37796	0.924574	3.78511	2.05532	7.21483	1.32961	6.34674	1.76325	11.1314	2.13016	4.70176	2.7461	15.0231	4.37827	2.28775
11.1865	5.54852	2.67029	0.672733	2.97419	2.38409	2.17038	3.38199	6.40495	16.6509	8.37505	0.92456	3.7913	2.05504	7.20059	1.33149	6.34812	1.76507	11.1248	2.13465	4.70102	2.7488	14.9868	4.36501	2.28972
11.1931	5.54483	2.66862	0.670851	2.97125	2.37814	2.17619	3.37854	6.40395	16.6598	8.37214	0.924462	3.79742	2.05478	7.18681	1.33341	6.34954	1.76702	11.1185	2.13911	4.70041	2.75152	14.9526	4.35182	2.29172
11.1998	5.54129	2.667	0.668982	2.96838	2.37231	2.18198	3.37492	6.40293	16.6679	8.36922	0.924278	3.80347	2.05452	7.17352	1.33536	6.35103	1.76912	11.1126	2.14356	4.69996	2.75426	14.9205	4.33869	2.29374
11.2065	5.5379	2.66542	0.667124	2.96558	2.3666	2.18777	3.37113	6.40189	16.6754	8.36631	0.924007	3.80945	2.05428	7.16071	1.33736	6.35256	1.77135	11.1071	2.14798	4.69966	2.75702	14.8904	4.32562	2.29578
11.2131	5.53464	2.66389	0.665282	2.96284	2.36102	2.19353	3.36719	6.40084	16.6821	8.36343	0.92365	3.81537	2.05405	7.1484	1.33939	6.35415	1.77372	11.102	2.15237	4.69952	2.7598	14.8622	4.31261	2.29784
11.2198	5.53152	2.66239	0.663448	2.96017	2.35554	2.19929	3.36308	6.39976	16.6882	8.36055	0.923205	3.82122	2.05382	7.13658	1.34146	6.3558	1.77622	11.0973	2.15674	4.69955	2.76261	14.836	4.29967	2.29993
11.2265	5.52854	2.66093	0.661631	2.95757	2.35018	2.20502	3.35882	6.39867	16.6936	8.35771	0.922675	3.82701	2.05361	7.12526	1.34356	6.3575	1.77887	11.0929	2.16107	4.69975	2.76543	14.8116	4.28678	2.30204
11.2331	5.52569	2.65951	0.659822	2.95503	2.34493	2.21074	3.35441	6.39757	16.6983	8.35491	0.922058	3.83275	2.0534	7.11443	1.34569	6.35926	1.78166	11.089	2.16538	4.70014	2.76827	14.789	4.27395	2.30417
11.2398	5.52296	2.65811	0.658027	2.95255	2.33978	2.21643	3.34986	6.39646	16.7024	8.35214	0.921354	3.83843	2.0532	7.10411	1.34786	6.36108	1.78458	11.0854	2.16965	4.7007	2.77113	14.768	4.26119	2.30633
11.2465	5.52037	2.65675	0.656243	2.95014	2.33473	2.22211	3.34516	6.39534	16.7059	8.34942	0.920565	3.84406	2.05302	7.0943	1.35005	6.36297	1.78764	11.0823	2.17389	4.70145	2.774	14.7488	4.24849	2.30851
11.2531	5.5179	2.65542	0.654473	2.94779	2.32979	2.22777	3.34033	6.39421	16.7088	8.34676	0.91969	3.84964	2.05284	7.08498	1.35227	6.36492	1.79084	11.0795	2.1781	4.70239	2.77689	14.7311	4.23586	2.31071
11.2598	5.51555	2.65412	0.652713	2.9455	2.32495	2.23341	3.33537	6.39307	16.7111	8.34416	0.918731	3.85517	2.05267	7.07618	1.35452	6.36693	1.79418	11.0771	2.18227	4.70353	2.7798	14.7149	4.22329	2.31294
11.2665	5.51332	2.65284	0.650966	2.94328	2.32021	2.23902	3.33028	6.39193	16.7128	8.34163	0.917689	3.86066	2.05251	7.06788	1.35679	6.36901	1.79765	11.0751	2.18641	4.70486	2.78271	14.7002	4.21079	2.31519
11.2731	5.5112	2.65159	0.649229	2.94112	2.31557	2.24461	3.32507	6.39079	16.714	8.33918	0.916563	3.86611	2.05236	7.06009	1.35909	6.37116	1.80127	11.0735	2.19051	4.70641	2.78563	14.6868	4.19836	2.31746
11.2798	5.50919	2.65035	0.647507	2.93902	2.31103	2.25017	3.31974	6.38964	16.7146	8.33681	0.915356	3.87152	2.05221	7.05281	1.3614	6.37338	1.80502	11.0722	2.19457	4.70816	2.78857	14.6749	4.18601	2.31976
11.2865	5.5073	2.64914	0.645794	2.93699	2.30659	2.25571	3.31431	6.3885	16.7147	8.33453	0.914069	3.87688	2.05208	7.04604	1.36374	6.37568	1.80891	11.0713	2.1986	4.71013	2.79151	14.6642	4.17373	2.32209
11.2931	5.5055	2.64794	0.644094	2.93501	2.30225	2.26123	3.30876	6.38736	16.7143	8.33235	0.912702	3.88221	2.05196	7.03977	1.36609	6.37804	1.81294	11.0708	2.20258	4.71231	2.79445	14.6547	4.16153	2.32444
11.2998	5.50381	2.64676	0.642406	2.93311	2.29802	2.26671	3.30312	6.38622	16.7134	8.33027	0.911258	3.88751	2.05184	7.03401	1.36846	6.38048	1.8171	11.0707	2.20653	4.71472	2.7974	14.6464	4.14942	2.32682
11.3065	5.50222	2.64559	0.64073	2.93127	2.29389	2.27217	3.29739	6.38509	16.712	8.32831	0.909739	3.89277	2.05173	7.02876	1.37084	6.383	1.8214	11.0709	2.21044	4.71735	2.80035	14.6393	4.13739	2.32923
11.3131	5.50073	2.64444	0.639064	2.92949	2.28986	2.27759	3.29156	6.38397	16.7101	8.32646	0.908146	3.898	2.05163	7.02402	1.37323	6.3856	1.82584	11.0715	2.21431	4.72021	2.8033	14.6332	4.12546	2.33166
11.3198	5.49932	2.6433	0.637412	2.92779	2.28594	2.28298	3.28566	6.38287	16.7078	8.32474	0.906481	3.9032	2.05153	7.01978	1.37563	6.38827	1.83042	11.0724	2.21815	4.72329	2.80625	14.6282	4.11363	2.33412
11.3265	5.49802	2.64216	0.635774	2.92615	2.28214	2.28834	3.27967	6.38177	16.7051	8.32314	0.904745	3.90838	2.05145	7.01604	1.37804	6.39103	1.83513	11.0737	2.22194	4.72661	2.8092	14.6241	4.10191	2.33661
11.3331	5.49679	2.64104	0.634143	2.92459	2.27844	2.29367	3.27362	6.3807	16.702	8.32169	0.902943	3.91353	2.05137	7.0128	1.38045	6.39387	1.83997	11.0753	2.22569	4.73017	2.81214	14.6209	4.09029	2.33912
11.3398	5.49565	2.63992	0.632529	2.9231	2.27486	2.29896	3.2675	6.37964	16.6985	8.32039	0.901075	3.91865	2.05129	7.01006	1.38287	6.3968	1.84495	11.0773	2.2294	4.73397	2.81508	14.6186	4.07879	2.34166
11.3465	5.49459	2.63881	0.630922	2.92168	2.2714	2.30422	3.26132	6.37861	16.6946	8.31922	0.899143	3.92376	2.05123	7.00783	1.38529	6.39981	1.85006	11.0796	2.23308	4.73801	2.818	14.6172	4.06741	2.34424
11.3531	5.4936	2.6377	0.629329	2.92034	2.26807	2.30944	3.25508	6.3776	16.6903	8.31821	0.897151	3.92885	2.05117	7.0061	1.38771	6.40291	1.85531	11.0823	2.23671	4.74229	2.82091	14.6165	4.05616	2.34684
11.3598	5.49269	2.6366	0.627748	2.91907	2.26486	2.31462	3.24881	6.37661	16.6857	8.31737	0.895102	3.93393	2.05111	7.00485	1.39013	6.40609	1.86069	11.0852	2.24031	4.74682	2.82381	14.6166	4.04505	2.34947
11.3665	5.49185	2.6355	0.62618	2.91789	2.26178	2.31976	3.24248	6.37566	16.6808	8.3167	0.892996	3.93898	2.05107	7.0041	1.39254	6.40936	1.8662	11.0885	2.24386	4.75159	2.8267	14.6173	4.03408	2.35213
11.3731	5.49108	2.63441	0.624624	2.91678	2.25884	2.32486	3.23613	6.37474	16.6755	8.3162	0.890839	3.94403	2.05102	7.00385	1.39495	6.41273	1.87184	11.0921	2.24738	4.75662	2.82957	14.6188	4.02325	2.35482
11.3798	5.49038	2.63331	0.623081	2.91576	2.25603	2.32991	3.22974	6.37385	16.6699	8.31588	0.888632	3.94907	2.05099	7.00408	1.39735	6.41618	1.87762	11.096	2.25086	4.76189	2.83242	14.6208	4.01258	2.35754
11.3865	5.48974	2.63222	0.621549	2.91483	2.25337	2.33493	3.22334	6.373	16.6641	8.31575	0.886377	3.9541	2.05096	7.00481	1.39975	6.41972	1.88352	11.1002	2.2543	4.76741	2.83526	14.6234	4.00207	2.36029
11.3931	5.48915	2.63112	0.62003	2.91398	2.25086	2.3399	3.21691	6.3722	16.6579	8.3158	0.88408	3.95912	2.05094	7.00601	1.40213	6.42336	1.88955	11.1047	2.25771	4.77319	2.83807	14.6265	3.99173	2.36307
11.3998	5.48862	2.63003	0.618522	2.91322	2.2485	2.34483	3.21048	6.37144	16.6516	8.31605	0.881741	3.96415	2.05092	7.00771	1.4045	6.42709	1.89571	11.1095	2.26107	4.77922	2.84085	14.6301	3.98156	2.36588
11.4065	5.48815	2.62894	0.617029	2.91256	2.24631	2.34971	3.20404	6.37073	16.6449	8.3165	0.879365	3.96917	2.0509	7.00989	1.40686	6.43091	1.902	11.1146	2.26441	4.7855	2.84361	14.6342	3.97158	2.36872
11.4131	5.48773	2.62785	0.615545	2.91199	2.24427	2.35454	3.19761	6.37008	16.6381	8.31715	0.876954	3.9742	2.0509	7.01255	1.4092	6.43482	1.90841	11.12	2.2677	4.79204	2.84635	14.6387	3.96178	2.37159
11.4198	5.48735	2.62675	0.614077	2.91151	2.2424	2.35933	3.19118	6.36947	16.631	8.31802	0.874512	3.97924	2.05089	7.01569	1.41153	6.43883	1.91495	11.1256	2.27096	4.79883	2.84906	14.6436	3.95217	2.37449
11.4265	5.48702	2.62566	0.612621	2.91114	2.24071	2.36407	3.18477	6.36893	16.6237	8.31909	0.872041	3.98429	2.0509	7.01931	1.41384	6.44293	1.92161	11.1315	2.27419	4.80587	2.85173	14.6489	3.94277	2.37742
11.4331	5.48674	2.62456	0.611176	2.91086	2.23919	2.36875	3.17838	6.36846	16.6163	8.32038	0.869546	3.98935	2.0509	7.02341	1.41614	6.44713	1.92839	11.1377	2.27738	4.81317	2.85438	14.6544	3.93356	2.38038
11.4398	5.48649	2.62347	0.609744	2.91069	2.23786	2.37339	3.17202	6.36805	16.6086	8.3219	0.867027	3.99442	2.05092	7.02797	1.41841	6.45142	1.93529	11.1441	2.28054	4.82072	2.857	14.6603	3.92457	2.38337
11.4465	5.48629	2.62238	0.608325	2.91062	2.23672	2.37798	3.16569	6.36771	16.6008	8.32363	0.864492	3.99952	2.05094	7.03302	1.42067	6.4558	1.94231	11.1507	2.28367	4.82852	2.85958	14.6664	3.91579	2.3864
11.4531	5.48611	2.62128	0.60692	2.91066	2.23577	2.38251	3.1594	6.36745	16.5929	8.32558	0.861941	4.00464	2.05096	7.03853	1.4229	6.46027	1.94945	11.1576	2.28677	4.83657	2.86213	14.6727	3.90722	2.38945
11.4598	5.48598	2.62019	0.605526	2.9108	2.23501	2.38699	3.15316	6.36727	16.5848	8.32777	0.859377	4.00979	2.05099	7.04452	1.42512	6.46483	1.95671	11.1648	2.28984	4.84488	2.86464	14.6792	3.89888	2.39253
11.4665	5.48587	2.6191	0.604146	2.91106	2.23446	2.39142	3.14697	6.36718	16.5766	8.3302	0.856805	4.01497	2.05103	7.05098	1.42731	6.46949	1.96407	11.1721	2.29288	4.85343	2.86712	14.6858	3.89077	2.39564
11.4731	5.48579	2.61801	0.602777	2.91142	2.23412	2.3958	3.14083	6.36717	16.5682	8.33286	0.854227	4.02018	2.05107	7.05791	1.42948	6.47423	1.97155	11.1797	2.29589	4.86223	2.86955	14.6926	3.88288	2.39878
11.4798	5.48574	2.61693	0.601421	2.9119	2.23399	2.40012	3.13476	6.36724	16.5598	8.33574	0.851646	4.02543	2.05112	7.06531	1.43163	6.47907	1.97914	11.1874	2.29887	4.87127	2.87195	14.6995	3.87523	2.40194
11.4865	5.48572	2.61584	0.600079	2.9125	2.23407	2.40438	3.12877	6.36743	16.5513	8.33886	0.849066	4.03073	2.05118	7.07318	1.43375	6.48399	1.98684	11.1954	2.30183	4.88056	2.87431	14.7065	3.86781	2.40514
11.4931	5.48572	2.61476	0.598749	2.91321	2.23438	2.40859	3.12284	6.36771	16.5427	8.34222	0.846488	4.03607	2.05124	7.08152	1.43585	6.489	1.99464	11.2036	2.30476	4.89009	2.87663	14.7135	3.86063	2.40836
11.4998	5.48573	2.61369	0.597431	2.91405	2.2349	2.41275	3.117	6.36809	16.534	8.34582	0.843918	4.04146	2.05132	7.09032	1.43793	6.4941	2.00255	11.212	2.30767	4.89986	2.87891	14.7205	3.85369	2.41161
11.5065	5.48577	2.61262	0.596124	2.915	2.23565	2.41685	3.11125	6.36858	16.5252	8.34966	0.841357	4.04691	2.0514	7.0996	1.43999	6.49928	2.01055	11.2205	2.31056	4.90988	2.88115	14.7276	3.84698	2.41488
11.5131	5.48583	2.61156	0.594832	2.91607	2.23664	2.42089	3.10559	6.36918	16.5164	8.35373	0.838807	4.05241	2.05148	7.10934	1.44202	6.50454	2.01866	11.2293	2.31342	4.92012	2.88335	14.7346	3.84052	2.41818
11.5198	5.4859	2.61051	0.593553	2.91727	2.23785	2.42488	3.10002	6.3699	16.5076	8.35804	0.836273	4.05799	2.05158	7.11956	1.44403	6.50988	2.02685	11.2382	2.31627	4.9306	2.8855	14.7415	3.8343	2.42151
11.5265	5.48598	2.60947	0.592285	2.91859	2.23931	2.42882	3.09457	6.37075	16.4987	8.36259	0.833756	4.06363	2.05169	7.13025	1.44602	6.51531	2.03514	11.2473	2.3191	4.94131	2.88761	14.7484	3.82832	2.42485
11.5331	5.48609	2.60843	0.59103	2.92003	2.241	2.43269	3.08922	6.37171	16.4898	8.36738	0.83126	4.06934	2.05181	7.1414	1.44799	6.5208	2.04352	11.2565	2.3219	4.95224	2.88968	14.7551	3.82258	2.42823
11.5398	5.4862	2.60741	0.589786	2.92161	2.24293	2.43651	3.08399	6.37281	16.4809	8.37239	0.828785	4.07513	2.05194	7.15304	1.44994	6.52638	2.05199	11.2659	2.3247	4.9634	2.89171	14.7617	3.81707	2.43162
11.5465	5.48632	2.6064	0.588557	2.92331	2.24511	2.44028	3.07888	6.37403	16.472	8.37764	0.826335	4.081	2.05208	7.16514	1.45186	6.53203	2.06053	11.2754	2.32748	4.97478	2.89369	14.7682	3.81181	2.43504
11.5531	5.48646	2.6054	0.587337	2.92514	2.24753	2.44399	3.07389	6.37539	16.4631	8.38312	0.823913	4.08696	2.05224	7.17773	1.45377	6.53775	2.06916	11.2851	2.33024	4.98638	2.89563	14.7744	3.80678	2.43848
11.5598	5.4866	2.60441	0.586131	2.9271	2.25021	2.44764	3.06904	6.37688	16.4542	8.38883	0.821521	4.09301	2.05241	7.1908	1.45565	6.54353	2.07786	11.2949	2.33299	4.9982	2.89753	14.7805	3.80199	2.44193
11.5665	5.48675	2.60344	0.584936	2.92919	2.25313	2.45124	3.06432	6.37853	16.4453	8.39475	0.81916	4.09915	2.05259	7.20434	1.45752	6.54939	2.08663	11.3049	2.33573	5.01022	2.89938	14.7864	3.79742	2.44541
11.5731	5.48692	2.60249	0.583752	2.93142	2.2563	2.45478	3.05974	6.38031	16.4365	8.4009	0.816832	4.1054	2.05279	7.21837	1.45937	6.55531	2.09546	11.315	2.33847	5.02246	2.90119	14.792	3.79309	2.44891
11.5798	5.48708	2.60155	0.58258	2.93377	2.25973	2.45827	3.05531	6.38224	16.4277	8.40726	0.81454	4.11175	2.053	7.23288	1.46121	6.5613	2.10436	11.3252	2.34119	5.0349	2.90296	14.7973	3.78898	2.45242
11.5865	5.48726	2.60064	0.581421	2.93626	2.26341	2.46171	3.05103	6.38432	16.4189	8.41384	0.812285	4.11821	2.05323	7.24788	1.46303	6.56735	2.11331	11.3355	2.34391	5.04754	2.90469	14.8024	3.78509	2.45595
11.5931	5.48745	2.59974	0.580272	2.93889	2.26734	2.46509	3.0469	6.38656	16.4102	8.42062	0.810068	4.12478	2.05348	7.26338	1.46483	6.57345	2.12232	11.346	2.34662	5.06037	2.90638	14.8071	3.78142	2.4595
11.5998	5.48764	2.59886	0.579135	2.94166	2.27153	2.46843	3.04293	6.38894	16.4015	8.42761	0.807892	4.13148	2.05375	7.27936	1.46663	6.57961	2.13138	11.3565	2.34933	5.07341	2.90802	14.8116	3.77796	2.46306
11.6065	5.48785	2.598	0.578008	2.94456	2.27597	2.47171	3.03913	6.39149	16.393	8.43479	0.805756	4.13829	2.05404	7.29585	1.46841	6.58581	2.14048	11.3672	2.35204	5.08663	2.90962	14.8157	3.77471	2.46663
11.6131	5.48806	2.59717	0.576893	2.9476	2.28067	2.47493	3.03549	6.39419	16.3845	8.44216	0.803664	4.14523	2.05434	7.31283	1.47018	6.59207	2.14962	11.378	2.35474	5.10003	2.91119	14.8194	3.77165	2.47022
11.6198	5.48827	2.59636	0.575787	2.95078	2.28562	2.47811	3.03203	6.39705	16.3761	8.44971	0.801615	4.1523	2.05467	7.33032	1.47194	6.59839	2.15879	11.3889	2.35745	5.11362	2.91272	14.8227	3.7688	2.47382
11.6265	5.48851	2.59557	0.574692	2.9541	2.29083	2.48124	3.02874	6.40007	16.3677	8.45745	0.799611	4.1595	2.05503	7.34831	1.4737	6.60474	2.16799	11.3999	2.36016	5.12739	2.91421	14.8257	3.76614	2.47744
11.6331	5.48874	2.59481	0.573609	2.95756	2.29629	2.48432	3.02563	6.40326	16.3595	8.46535	0.797653	4.16685	2.05541	7.36681	1.47544	6.61114	2.17721	11.4111	2.36287	5.14133	2.91566	14.8282	3.76367	2.48107
11.6398	5.48899	2.59407	0.572535	2.96116	2.30201	2.48736	3.0227	6.40661	16.3514	8.47343	0.79574	4.17433	2.05581	7.38583	1.47719	6.61757	2.18644	11.4223	2.36559	5.15545	2.91707	14.8304	3.76137	2.4847
11.6465	5.48926	2.59336	0.571472	2.96491	2.30798	2.49034	3.01996	6.41011	16.3434	8.48165	0.793876	4.18196	2.05624	7.40536	1.47893	6.62405	2.19569	11.4337	2.36832	5.16972	2.91845	14.8321	3.75924	2.48835
11.6531	5.48953	2.59268	0.570417	2.9688	2.31421	2.49328	3.01741	6.41379	16.3355	8.49003	0.792058	4.18974	2.05669	7.4254	1.48066	6.63056	2.20494	11.4452	2.37105	5.18417	2.91979	14.8333	3.75728	2.49201
11.6598	5.48982	2.59203	0.569373	2.97284	2.32069	2.49618	3.01505	6.41763	16.3278	8.49853	0.790289	4.19767	2.05718	7.44597	1.4824	6.6371	2.21419	11.4567	2.37379	5.19877	2.92111	14.834	3.75548	2.49567
11.6665	5.49012	2.5914	0.568337	2.97702	2.32742	2.49903	3.01289	6.42164	16.3202	8.50718	0.788567	4.20575	2.05769	7.46706	1.48413	6.64367	2.22343	11.4684	2.37654	5.21353	2.92239	14.8343	3.75383	2.49935
11.6731	5.49045	2.59081	0.567312	2.98135	2.33441	2.50185	3.01092	6.42579	16.3127	8.51595	0.786895	4.21399	2.05824	7.48868	1.48587	6.65027	2.23266	11.4803	2.37931	5.22843	2.92363	14.8341	3.75231	2.50303
11.6798	5.49079	2.59025	0.566295	2.98583	2.34164	2.50461	3.00916	6.43012	16.3053	8.52483	0.785271	4.22239	2.05882	7.51082	1.48761	6.6569	2.24186	11.4922	2.38209	5.24349	2.92485	14.8334	3.75093	2.50672
11.6865	5.49116	2.58971	0.565285	2.99046	2.34913	2.50735	3.00759	6.43461	16.2982	8.53381	0.783695	4.23095	2.05943	7.5335	1.48936	6.66354	2.25104	11.5043	2.38489	5.25868	2.92604	14.8322	3.74968	2.51042
11.6931	5.49155	2.5892	0.564287	2.99524	2.35686	2.51003	3.00624	6.43926	16.2911	8.54289	0.782168	4.23967	2.06008	7.55671	1.49111	6.6702	2.26019	11.5166	2.3877	5.27402	2.9272	14.8305	3.74853	2.51413
11.6998	5.49197	2.58873	0.563295	3.00017	2.36485	2.51269	3.00509	6.44407	16.2843	8.55205	0.780689	4.24856	2.06076	7.58045	1.49286	6.67688	2.26929	11.5289	2.39053	5.28949	2.92834	14.8282	3.7475	2.51784
11.7065	5.49242	2.58829	0.562311	3.00525	2.37308	2.51531	3.00415	6.44903	16.2776	8.56129	0.779258	4.25762	2.06148	7.60472	1.49463	6.68358	2.27835	11.5414	2.39338	5.30509	2.92945	14.8254	3.74656	2.52156
11.7131	5.49289	2.58788	0.561336	3.01049	2.38155	2.51789	3.00342	6.45414	16.2711	8.57059	0.777875	4.26684	2.06223	7.62953	1.4964	6.69028	2.28735	11.5541	2.39625	5.32082	2.93054	14.822	3.7457	2.52529
11.7198	5.49341	2.5875	0.560368	3.01588	2.39028	2.52043	3.0029	6.45941	16.2648	8.57994	0.776539	4.27622	2.06303	7.65487	1.49818	6.69699	2.29629	11.567	2.39914	5.33668	2.9316	14.8182	3.74492	2.52902
11.7265	5.49396	2.58716	0.559408	3.02143	2.39924	2.52295	3.0026	6.46483	16.2586	8.58934	0.775249	4.28577	2.06386	7.68075	1.49997	6.70371	2.30517	11.58	2.40206	5.35265	2.93265	14.8137	3.74421	2.53276
11.7331	5.49454	2.58685	0.558454	3.02713	2.40845	2.52543	3.00252	6.47039	16.2526	8.59876	0.774006	4.29549	2.06474	7.70716	1.50177	6.71043	2.31397	11.5932	2.405	5.36873	2.93368	14.8087	3.74354	2.53651
11.7398	5.49518	2.58656	0.557507	3.03299	2.4179	2.52789	3.00265	6.4761	16.2468	8.60821	0.772807	4.30538	2.06566	7.73411	1.50359	6.71715	2.32269	11.6066	2.40797	5.38494	2.93469	14.8031	3.74292	2.54026
11.7465	5.49585	2.58632	0.556567	3.03901	2.4276	2.53031	3.003	6.48196	16.2412	8.61766	0.771654	4.31544	2.06662	7.76158	1.50542	6.72386	2.33132	11.6202	2.41096	5.40124	2.93569	14.7969	3.74233	2.54402
11.7531	5.49659	2.5861	0.555635	3.04519	2.43753	2.53271	3.00356	6.48794	16.2358	8.62711	0.770543	4.32565	2.06762	7.78958	1.50726	6.73057	2.33986	11.634	2.41398	5.41766	2.93667	14.7902	3.74176	2.54779
11.7598	5.49736	2.58592	0.554709	3.05153	2.44771	2.53508	3.00435	6.49406	16.2306	8.63654	0.769476	4.33603	2.06867	7.81811	1.50911	6.73727	2.34829	11.648	2.41703	5.43417	2.93764	14.7829	3.7412	2.55157
11.7665	5.4982	2.58576	0.553788	3.05802	2.45812	2.53742	3.00535	6.50032	16.2256	8.64595	0.76845	4.34657	2.06977	7.84716	1.51098	6.74395	2.35662	11.6622	2.42011	5.45078	2.9386	14.775	3.74063	2.55535
11.7731	5.4991	2.58564	0.552874	3.06468	2.46877	2.53974	3.00658	6.50669	16.2207	8.65531	0.767467	4.35727	2.07092	7.87673	1.51286	6.75063	2.36484	11.6767	2.42322	5.46749	2.93956	14.7666	3.74004	2.55914
11.7798	5.50006	2.58556	0.551966	3.0715	2.47966	2.54203	3.00802	6.51319	16.2161	8.66463	0.766522	4.36813	2.07211	7.90681	1.51476	6.75727	2.37293	11.6914	2.42637	5.48428	2.9405	14.7576	3.73942	2.56293
11.7865	5.50109	2.5855	0.551063	3.07848	2.49078	2.54431	3.00968	6.51981	16.2116	8.67389	0.765616	4.37914	2.07335	7.93739	1.51668	6.7639	2.3809	11.7064	2.42954	5.50117	2.94144	14.748	3.73876	2.56674
11.7931	5.50219	2.58547	0.550167	3.08562	2.50214	2.54656	3.01157	6.52655	16.2074	8.68306	0.764748	4.3903	2.07464	7.96848	1.51861	6.77051	2.38873	11.7217	2.43275	5.51813	2.94238	14.7379	3.73805	2.57055
11.7998	5.50336	2.58548	0.549276	3.09293	2.51374	2.5488	3.01367	6.53339	16.2033	8.69216	0.763917	4.4016	2.07598	8.00006	1.52055	6.77709	2.39643	11.7372	2.43599	5.53518	2.94332	14.7271	3.73726	2.57438
11.8065	5.50462	2.58551	0.548389	3.1004	2.52556	2.55101	3.01599	6.54034	16.1994	8.70115	0.763121	4.41305	2.07737	8.03212	1.52251	6.78363	2.40398	11.753	2.43927	5.5523	2.94425	14.7158	3.7364	2.57821
11.8131	5.50595	2.58558	0.547508	3.10802	2.53762	2.55321	3.01853	6.54739	16.1956	8.71003	0.762359	4.42464	2.07881	8.06466	1.52449	6.79014	2.41139	11.7691	2.44259	5.56949	2.94519	14.704	3.73545	2.58205
11.8198	5.50737	2.58567	0.546633	3.11581	2.54991	2.55538	3.02129	6.55454	16.1921	8.71878	0.76163	4.43635	2.0803	8.09767	1.52648	6.79661	2.41863	11.7854	2.44594	5.58676	2.94614	14.6915	3.73439	2.58591
11.8265	5.50888	2.5858	0.545762	3.12376	2.56243	2.55755	3.02426	6.56177	16.1887	8.72741	0.760933	4.4482	2.08184	8.13113	1.52848	6.80305	2.42572	11.8021	2.44932	5.60409	2.94708	14.6786	3.73321	2.58977
11.8331	5.51049	2.58595	0.544897	3.13188	2.57518	2.55969	3.02745	6.56908	16.1855	8.73588	0.760266	4.46017	2.08344	8.16503	1.5305	6.80943	2.43264	11.8191	2.45275	5.62148	2.94804	14.6651	3.7319	2.59365
11.8398	5.51219	2.58613	0.544037	3.14015	2.58815	2.56183	3.03085	6.57648	16.1824	8.74419	0.759629	4.47226	2.0851	8.19937	1.53253	6.81576	2.43939	11.8364	2.45621	5.63893	2.949	14.651	3.73045	2.59753
11.8465	5.514	2.58634	0.543181	3.14857	2.60135	2.56394	3.03446	6.58396	16.1794	8.75234	0.75902	4.48446	2.0868	8.23412	1.53457	6.82205	2.44596	11.854	2.45971	5.65644	2.94998	14.6365	3.72885	2.60143
11.8531	5.51591	2.58657	0.54233	3.15716	2.61477	2.56605	3.03829	6.5915	16.1766	8.76031	0.758438	4.49677	2.08856	8.26928	1.53663	6.82827	2.45235	11.8719	2.46324	5.67401	2.95096	14.6214	3.72708	2.60534
11.8598	5.51792	2.58683	0.541484	3.1659	2.62842	2.56814	3.04232	6.5991	16.1739	8.76808	0.75788	4.50917	2.09037	8.30483	1.5387	6.83444	2.45857	11.8902	2.46681	5.69161	2.95197	14.6058	3.72513	2.60927
11.8665	5.52006	2.58712	0.540643	3.1748	2.64228	2.57022	3.04656	6.60676	16.1713	8.77564	0.757347	4.52167	2.09224	8.34075	1.54078	6.84055	2.46459	11.9088	2.47042	5.70927	2.95298	14.5897	3.723	2.61321
11.8731	5.52231	2.58743	0.539808	3.18385	2.65636	2.57229	3.051	6.61447	16.1688	8.783	0.756838	4.53426	2.09416	8.37702	1.54287	6.84659	2.47042	11.9276	2.47407	5.72697	2.95402	14.5731	3.72068	2.61716
11.8798	5.52467	2.58776	0.538976	3.19305	2.67066	2.57435	3.05565	6.62223	16.1664	8.79013	0.756349	4.54692	2.09614	8.41364	1.54496	6.85256	2.47606	11.9468	2.47776	5.74471	2.95507	14.5561	3.71815	2.62113
11.8865	5.52717	2.58812	0.53815	3.2024	2.68517	2.5764	3.06049	6.63003	16.164	8.79702	0.755882	4.55967	2.09817	8.45057	1.54707	6.85846	2.4815	11.9663	2.48148	5.76249	2.95615	14.5386	3.7154	2.62511
11.8931	5.52978	2.58851	0.53733	3.21189	2.69989	2.57844	3.06554	6.63785	16.1617	8.80367	0.755434	4.57248	2.10026	8.48781	1.54918	6.86427	2.48674	11.9862	2.48524	5.7803	2.95724	14.5206	3.71244	2.62911
11.8998	5.53253	2.58891	0.536513	3.22152	2.71481	2.58047	3.07077	6.64571	16.1595	8.81006	0.755003	4.58534	2.1024	8.52531	1.5513	6.87001	2.49177	12.0063	2.48903	5.79815	2.95836	14.5022	3.70924	2.63313
11.9065	5.53541	2.58934	0.535702	3.2313	2.72994	2.58248	3.0762	6.65357	16.1573	8.81619	0.754591	4.59827	2.1046	8.56308	1.55342	6.87566	2.49661	12.0267	2.49287	5.81602	2.9595	14.4835	3.7058	2.63716
11.9131	5.53842	2.58979	0.534896	3.24121	2.74527	2.58449	3.08182	6.66146	16.155	8.82206	0.754194	4.61124	2.10685	8.60108	1.55555	6.88122	2.50123	12.0475	2.49673	5.83391	2.96068	14.4642	3.70213	2.64122
11.9198	5.54158	2.59026	0.534096	3.25126	2.76079	2.58649	3.08762	6.66934	16.1528	8.82763	0.753812	4.62426	2.10915	8.6393	1.55768	6.88669	2.50565	12.0685	2.50063	5.85183	2.96187	14.4447	3.6982	2.64529
11.9265	5.54487	2.59075	0.533301	3.26143	2.7765	2.58848	3.0936	6.67723	16.1506	8.83292	0.753444	4.63731	2.1115	8.67769	1.5598	6.89207	2.50986	12.0898	2.50457	5.86976	2.9631	14.4247	3.69402	2.64938
11.9331	5.54831	2.59126	0.532512	3.27173	2.7924	2.59046	3.09975	6.6851	16.1482	8.83791	0.753089	4.65039	2.11391	8.71626	1.56193	6.89734	2.51386	12.1113	2.50853	5.88772	2.96435	14.4044	3.68959	2.65349
11.9398	5.55189	2.59179	0.531729	3.28215	2.80848	2.59243	3.10608	6.69297	16.1459	8.8426	0.752746	4.66349	2.11638	8.75496	1.56405	6.90251	2.51765	12.1331	2.51253	5.90568	2.96564	14.3837	3.6849	2.65762
11.9465	5.55562	2.59234	0.530952	3.29268	2.82473	2.59439	3.11258	6.7008	16.1434	8.84697	0.752414	4.67661	2.11889	8.79377	1.56618	6.90757	2.52122	12.1552	2.51656	5.92365	2.96696	14.3627	3.67995	2.66177
11.9531	5.5595	2.5929	0.530181	3.30333	2.84115	2.59634	3.11924	6.70861	16.1409	8.85103	0.752092	4.68974	2.12145	8.83266	1.56829	6.91252	2.52458	12.1775	2.52062	5.94163	2.96831	14.3415	3.67473	2.66595
11.9598	5.56353	2.59349	0.529417	3.31408	2.85773	2.59828	3.12606	6.71637	16.1382	8.85477	0.75178	4.70287	2.12407	8.87161	1.5704	6.91736	2.52774	12.2	2.52471	5.95962	2.9697	14.3199	3.66926	2.67014
11.9665	5.56771	2.59409	0.528658	3.32494	2.87447	2.60021	3.13304	6.72409	16.1353	8.85818	0.751476	4.71601	2.12673	8.91058	1.5725	6.92207	2.53068	12.2227	2.52883	5.97761	2.97112	14.2981	3.66351	2.67436
11.9731	5.57204	2.5947	0.527907	3.33588	2.89136	2.60213	3.14017	6.73176	16.1324	8.86126	0.751181	4.72915	2.12945	8.94955	1.5746	6.92667	2.53342	12.2456	2.53297	5.9956	2.97258	14.276	3.65752	2.67861
11.9798	5.57653	2.59533	0.527163	3.34692	2.90839	2.60404	3.14744	6.73936	16.1292	8.86399	0.750893	4.74227	2.13221	8.98849	1.57668	6.93114	2.53594	12.2687	2.53714	6.01359	2.97407	14.2537	3.65126	2.68288
11.9865	5.58117	2.59598	0.526425	3.35804	2.92555	2.60594	3.15485	6.74689	16.1258	8.86639	0.750611	4.75538	2.13502	9.02737	1.57875	6.93548	2.53826	12.2919	2.54133	6.03157	2.97561	14.2312	3.64475	2.68717
11.9931	5.58597	2.59663	0.525695	3.36924	2.94283	2.60783	3.16239	6.75435	16.1222	8.86844	0.750336	4.76847	2.13788	9.06615	1.5808	6.93969	2.54037	12.3153	2.54554	6.04954	2.97718	14.2085	3.63799	2.6915
11.9998	5.59093	2.59731	0.524973	3.3805	2.96022	2.60971	3.17007	6.76172	16.1183	8.87014	0.750067	4.78155	2.14078	9.1048	1.58284	6.94376	2.54228	12.3388	2.54977	6.0675	2.97879	14.1856	3.63099	2.69585
12.0065	5.59604	2.59799	0.524259	3.39183	2.97772	2.61157	3.17786	6.769	16.1141	8.8715	0.749802	4.7946	2.14372	9.14331	1.58487	6.94771	2.54398	12.3624	2.55402	6.08545	2.98043	14.1626	3.62375	2.70022
12.0131	5.6013	2.59869	0.523553	3.40321	2.99531	2.61343	3.18577	6.77618	16.1097	8.8725	0.749542	4.80761	2.14671	9.18163	1.58687	6.9515	2.54549	12.3861	2.55828	6.10338	2.98212	14.1394	3.61627	2.70463
12.0198	5.60672	2.5994	0.522854	3.41464	3.01299	2.61527	3.19379	6.78324	16.1049	8.87314	0.749287	4.82061	2.14974	9.21974	1.58886	6.95516	2.5468	12.4099	2.56256	6.1213	2.98385	14.1161	3.60858	2.70906
12.0265	5.6123	2.60013	0.522165	3.42611	3.03073	2.6171	3.20192	6.7902	16.0999	8.87343	0.749036	4.83356	2.15281	9.25759	1.59082	6.95866	2.54792	12.4337	2.56686	6.1392	2.98562	14.0926	3.60067	2.71353
12.0331	5.61802	2.60086	0.521485	3.43761	3.04854	2.61891	3.21014	6.79702	16.0944	8.87337	0.748789	4.84648	2.15592	9.29517	1.59277	6.96202	2.54884	12.4576	2.57116	6.15707	2.98743	14.0691	3.59254	2.71802
12.0398	5.6239	2.6016	0.520814	3.44914	3.06639	2.62072	3.21845	6.80372	16.0886	8.87294	0.748545	4.85937	2.15907	9.33243	1.59469	6.96522	2.54958	12.4816	2.57547	6.17493	2.98928	14.0456	3.58423	2.72255
12.0465	5.62993	2.60236	0.520153	3.46068	3.08427	2.62251	3.22685	6.81028	16.0824	8.87217	0.748305	4.87221	2.16226	9.36936	1.59659	6.96828	2.55013	12.5055	2.57979	6.19276	2.99118	14.0219	3.57572	2.72711
12.0531	5.63611	2.60312	0.519502	3.47223	3.10218	2.62428	3.23532	6.81669	16.0757	8.87104	0.748068	4.88501	2.16547	9.40592	1.59846	6.97118	2.5505	12.5294	2.58411	6.21057	2.99311	13.9982	3.56704	2.73171
12.0598	5.64243	2.60389	0.51886	3.48378	3.12009	2.62604	3.24387	6.82295	16.0687	8.86956	0.747834	4.89778	2.16873	9.44207	1.6003	6.97391	2.55069	12.5533	2.58843	6.22835	2.99509	13.9745	3.5582	2.73633
12.0665	5.6489	2.60467	0.51823	3.49531	3.13799	2.62779	3.25247	6.82905	16.0611	8.86772	0.747604	4.91049	2.17201	9.4778	1.60212	6.97649	2.55071	12.5772	2.59275	6.24611	2.99711	13.9508	3.5492	2.74099
12.0731	5.65551	2.60546	0.517611	3.50683	3.15587	2.62952	3.26113	6.83498	16.0531	8.86554	0.747376	4.92317	2.17533	9.51307	1.60391	6.97892	2.55056	12.601	2.59707	6.26383	2.99917	13.9271	3.54006	2.74569
12.0798	5.66226	2.60625	0.517	3.51832	3.17371	2.63124	3.26984	6.84074	16.0446	8.86301	0.747151	4.93579	2.17867	9.54783	1.60567	6.98117	2.55025	12.6247	2.60139	6.28153	3.00127	13.9034	3.53079	2.75042
12.0865	5.66914	2.60705	0.516403	3.52977	3.1915	2.63294	3.27859	6.84632	16.0356	8.86014	0.74693	4.94838	2.18205	9.5821	1.6074	6.98326	2.54977	12.6484	2.6057	6.2992	3.00342	13.8798	3.52141	2.75519
12.0931	5.67616	2.60786	0.515817	3.54117	3.20921	2.63463	3.28737	6.85172	16.0261	8.85692	0.746711	4.96091	2.18544	9.61583	1.6091	6.98519	2.54913	12.6719	2.61	6.31685	3.0056	13.8561	3.51193	2.75999
12.0998	5.68331	2.60867	0.515244	3.55251	3.22684	2.63631	3.29617	6.85692	16.016	8.85337	0.746496	4.9734	2.18886	9.64898	1.61077	6.98695	2.54834	12.6954	2.61428	6.33446	3.00783	13.8326	3.50235	2.76483
12.1065	5.69058	2.60949	0.514681	3.56379	3.24436	2.63797	3.305	6.86193	16.0054	8.8495	0.746284	4.98584	2.19231	9.68155	1.61241	6.98854	2.5474	12.7187	2.61856	6.35204	3.0101	13.8091	3.4927	2.76971
12.1131	5.69798	2.61031	0.514132	3.57499	3.26176	2.63961	3.31383	6.86673	15.9941	8.84528	0.746076	4.99823	2.19577	9.7135	1.61401	6.98997	2.54631	12.7419	2.62281	6.36959	3.01241	13.7857	3.48299	2.77463
12.1198	5.70549	2.61114	0.513597	3.58611	3.27902	2.64124	3.32267	6.87133	15.9823	8.84075	0.745871	5.01057	2.19926	9.74482	1.61559	6.99122	2.54509	12.7649	2.62704	6.38711	3.01476	13.7624	3.47324	2.77958
12.1265	5.71312	2.61197	0.513073	3.59713	3.29612	2.64286	3.3315	6.87572	15.9699	8.8359	0.74567	5.02286	2.20276	9.77548	1.61712	6.99231	2.54372	12.7877	2.63126	6.40461	3.01715	13.7392	3.46344	2.78458
12.1331	5.72086	2.61281	0.512564	3.60804	3.31304	2.64447	3.34032	6.87989	15.9569	8.83074	0.745473	5.03511	2.20627	9.80546	1.61863	6.99323	2.54223	12.8104	2.63544	6.42208	3.01959	13.7161	3.45363	2.78961
12.1398	5.7287	2.61365	0.512068	3.61884	3.32977	2.64605	3.34912	6.88385	15.9432	8.82527	0.745281	5.0473	2.2098	9.83474	1.6201	6.99398	2.5406	12.8329	2.6396	6.43952	3.02206	13.6931	3.44381	2.79468
12.1465	5.73664	2.61449	0.511586	3.62951	3.34628	2.64763	3.35789	6.88758	15.9289	8.8195	0.745093	5.05944	2.21334	9.86332	1.62154	6.99456	2.53886	12.8552	2.64373	6.45694	3.02458	13.6703	3.434	2.79979
12.1531	5.74468	2.61533	0.511119	3.64005	3.36256	2.6492	3.36663	6.89109	15.9139	8.81344	0.744909	5.07153	2.2169	9.89117	1.62294	6.99498	2.53699	12.8773	2.64783	6.47433	3.02713	13.6475	3.42421	2.80494
12.1598	5.75281	2.61617	0.510665	3.65044	3.37858	2.65075	3.37532	6.89437	15.8983	8.80708	0.744732	5.08356	2.22045	9.91827	1.62432	6.99523	2.53501	12.8991	2.65189	6.4917	3.02972	13.625	3.41445	2.81012
12.1665	5.76103	2.61701	0.510227	3.66068	3.39434	2.65229	3.38397	6.89743	15.882	8.80045	0.74456	5.09554	2.22402	9.94463	1.62565	6.99531	2.53292	12.9207	2.65592	6.50905	3.03235	13.6026	3.40474	2.81535
12.1731	5.76933	2.61786	0.509804	3.67076	3.4098	2.65383	3.39256	6.90025	15.865	8.79354	0.744393	5.10747	2.22759	9.97022	1.62696	6.99522	2.53072	12.9421	2.6599	6.52639	3.03502	13.5804	3.39509	2.82061
12.1798	5.77771	2.61871	0.509397	3.68066	3.42495	2.65535	3.40108	6.90283	15.8473	8.78636	0.744233	5.11934	2.23116	9.99504	1.62823	6.99497	2.52842	12.9633	2.66384	6.54371	3.03772	13.5583	3.38551	2.82591
12.1865	5.78615	2.61955	0.509006	3.69039	3.43976	2.65687	3.40953	6.9052	15.8289	8.77892	0.74408	5.13115	2.23473	10.0191	1.62947	6.99455	2.52603	12.9842	2.66773	6.56102	3.04047	13.5364	3.37601	2.83125
12.1931	5.79467	2.6204	0.508629	3.69992	3.45423	2.65838	3.41791	6.90732	15.8098	8.77122	0.743933	5.1429	2.2383	10.0423	1.63068	6.99398	2.52354	13.0049	2.67158	6.57832	3.04325	13.5146	3.3666	2.83662
12.1998	5.80324	2.62124	0.50827	3.70925	3.46833	2.65989	3.4262	6.9092	15.79	8.76327	0.743794	5.15458	2.24187	10.0648	1.63186	6.99324	2.52096	13.0253	2.67538	6.59561	3.04606	13.4931	3.35729	2.84203
12.2065	5.81187	2.62209	0.507926	3.71837	3.48205	2.66139	3.43441	6.91086	15.7694	8.75509	0.743664	5.16621	2.24543	10.0865	1.633	6.99234	2.51829	13.0455	2.67912	6.6129	3.04892	13.4717	3.3481	2.84748
12.2131	5.82055	2.62293	0.507599	3.72728	3.49535	2.66289	3.44252	6.91228	15.7481	8.74666	0.743541	5.17776	2.24899	10.1074	1.63412	6.99129	2.51554	13.0654	2.68281	6.63019	3.05181	13.4505	3.33903	2.85296
12.2198	5.82927	2.62377	0.507289	3.73596	3.50824	2.66439	3.45053	6.91347	15.7261	8.73802	0.743428	5.18924	2.25253	10.1275	1.63521	6.99008	2.51272	13.0851	2.68643	6.64748	3.05473	13.4295	3.3301	2.85847
12.2265	5.83803	2.62461	0.506997	3.74442	3.52067	2.66589	3.45843	6.91443	15.7034	8.72915	0.743324	5.20065	2.25607	10.1468	1.63626	6.98872	2.50982	13.1045	2.69	6.66479	3.05769	13.4086	3.3213	2.86402
12.2331	5.84683	2.62545	0.506722	3.75263	3.53266	2.66739	3.46622	6.91516	15.6799	8.72007	0.743231	5.21198	2.25959	10.1654	1.63729	6.9872	2.50685	13.1236	2.69351	6.6821	3.06069	13.3879	3.31265	2.8696
12.2398	5.85566	2.62628	0.506462	3.76059	3.54416	2.6689	3.47389	6.91566	15.6556	8.71078	0.743147	5.22323	2.2631	10.1831	1.6383	6.98553	2.50382	13.1425	2.69695	6.69943	3.06371	13.3674	3.30416	2.87521
12.2465	5.86451	2.62712	0.50622	3.76831	3.55518	2.67041	3.48144	6.91594	15.6306	8.70129	0.743075	5.2344	2.26659	10.2001	1.63928	6.98372	2.50072	13.1611	2.70032	6.71679	3.06677	13.3471	3.29582	2.88085
12.2531	5.87338	2.62794	0.505998	3.77576	3.56568	2.67194	3.48887	6.91599	15.6049	8.69161	0.743015	5.24547	2.27007	10.2164	1.64024	6.98176	2.49756	13.1794	2.70363	6.73415	3.06987	13.3269	3.28765	2.88652
12.2598	5.88226	2.62877	0.505792	3.78295	3.57567	2.67347	3.49616	6.91582	15.5784	8.68174	0.742967	5.25645	2.27352	10.2319	1.64117	6.97966	2.49435	13.1976	2.70686	6.75156	3.073	13.3069	3.27965	2.89221
12.2665	5.89115	2.6296	0.505604	3.78986	3.58512	2.67502	3.50332	6.91544	15.5512	8.67169	0.742932	5.26734	2.27695	10.2467	1.64208	6.97743	2.49108	13.2154	2.71002	6.76899	3.07616	13.287	3.27182	2.89793
12.2731	5.90005	2.63042	0.505434	3.7965	3.59402	2.67658	3.51035	6.91484	15.5232	8.66147	0.74291	5.27812	2.28036	10.2608	1.64297	6.97505	2.48777	13.233	2.7131	6.78647	3.07935	13.2672	3.26418	2.90368
12.2798	5.90895	2.63124	0.505283	3.80286	3.60235	2.67817	3.51723	6.91404	15.4945	8.65108	0.742902	5.2888	2.28375	10.2741	1.64384	6.97254	2.4844	13.2504	2.7161	6.80399	3.08258	13.2477	3.25671	2.90944
12.2865	5.91784	2.63206	0.50515	3.80894	3.61012	2.67977	3.52398	6.91303	15.465	8.64053	0.74291	5.29935	2.28711	10.2868	1.64469	6.9699	2.481	13.2676	2.71902	6.82156	3.08583	13.2282	3.24942	2.91523
12.2931	5.92672	2.63288	0.505035	3.81472	3.61731	2.6814	3.53058	6.91181	15.4349	8.62983	0.742933	5.3098	2.29044	10.2989	1.64552	6.96713	2.47756	13.2845	2.72187	6.83918	3.08912	13.2088	3.24232	2.92104
12.2998	5.93559	2.6337	0.504938	3.82021	3.6239	2.68305	3.53703	6.9104	15.4039	8.61898	0.742972	5.32011	2.29374	10.3102	1.64635	6.96424	2.47407	13.3012	2.72462	6.85687	3.09244	13.1895	3.23539	2.92686
12.3065	5.94443	2.63451	0.50486	3.82541	3.6299	2.68473	3.54333	6.9088	15.3723	8.60798	0.743028	5.3303	2.297	10.321	1.64715	6.96122	2.47056	13.3177	2.7273	6.87461	3.09578	13.1704	3.22865	2.9327
12.3131	5.95326	2.63532	0.5048	3.8303	3.63529	2.68645	3.54948	6.90701	15.3399	8.59684	0.743101	5.34034	2.30024	10.3312	1.64795	6.95808	2.46702	13.334	2.72988	6.89243	3.09916	13.1513	3.22209	2.93855
12.3198	5.96205	2.63613	0.504759	3.8349	3.64007	2.6882	3.55548	6.90505	15.3068	8.58557	0.743192	5.35025	2.30344	10.3408	1.64873	6.95483	2.46344	13.35	2.73238	6.91032	3.10257	13.1322	3.21571	2.94441
12.3265	5.97082	2.63694	0.504735	3.8392	3.64424	2.68998	3.56133	6.90289	15.273	8.57417	0.743302	5.36001	2.3066	10.3498	1.6495	6.95146	2.45984	13.3659	2.73479	6.92829	3.106	13.1132	3.2095	2.95028
12.3331	5.97955	2.63774	0.504731	3.8432	3.64779	2.69182	3.56703	6.90057	15.2385	8.56265	0.743431	5.36962	2.30973	10.3583	1.65026	6.94799	2.45622	13.3817	2.7371	6.94634	3.10947	13.0942	3.20347	2.95616
12.3398	5.98825	2.63855	0.504746	3.84689	3.65073	2.6937	3.57258	6.89808	15.2033	8.55101	0.74358	5.37906	2.31281	10.3664	1.65102	6.94441	2.45258	13.3972	2.73932	6.96449	3.11297	13.0753	3.1976	2.96205
12.3465	5.99691	2.63935	0.504778	3.85029	3.65305	2.69562	3.57797	6.89542	15.1674	8.53925	0.74375	5.38833	2.31586	10.3739	1.65177	6.94072	2.44891	13.4126	2.74145	6.98273	3.11649	13.0563	3.1919	2.96793
12.3531	6.00552	2.64016	0.504829	3.85338	3.65476	2.6976	3.58322	6.89261	15.1308	8.52738	0.743941	5.39743	2.31886	10.381	1.65251	6.93694	2.44524	13.4279	2.74349	7.00107	3.12004	13.0373	3.18635	2.97382
12.3598	6.01408	2.64096	0.504897	3.85617	3.65585	2.69963	3.58831	6.88965	15.0936	8.51541	0.744154	5.40635	2.32181	10.3877	1.65325	6.93305	2.44155	13.443	2.74542	7.01952	3.12362	13.0183	3.18096	2.97971
12.3665	6.0226	2.64177	0.504984	3.85867	3.65634	2.70172	3.59326	6.88655	15.0557	8.50333	0.74439	5.41508	2.32473	10.394	1.65399	6.92908	2.43785	13.4579	2.74726	7.03808	3.12723	12.9992	3.17572	2.98559
12.3731	6.03106	2.64258	0.505089	3.86087	3.65623	2.70388	3.59806	6.88329	15.0172	8.49115	0.744647	5.42362	2.32759	10.3999	1.65473	6.92501	2.43414	13.4728	2.749	7.05675	3.13086	12.9801	3.17061	2.99146
12.3798	6.03947	2.64338	0.505212	3.86278	3.65552	2.7061	3.60272	6.87991	14.978	8.47887	0.744929	5.43196	2.33041	10.4055	1.65547	6.92086	2.43042	13.4876	2.75064	7.07555	3.13453	12.9608	3.16564	2.99733
12.3865	6.04783	2.64419	0.505353	3.86441	3.65424	2.70839	3.60724	6.87639	14.9382	8.4665	0.745234	5.44008	2.33318	10.4108	1.65621	6.91662	2.4267	13.5022	2.75218	7.09448	3.13822	12.9414	3.16079	3.00319
12.3931	6.05613	2.645	0.505511	3.86575	3.65238	2.71075	3.61161	6.87275	14.8979	8.45404	0.745564	5.448	2.3359	10.4159	1.65695	6.9123	2.42298	13.5168	2.75362	7.11353	3.14194	12.9219	3.15606	3.00903
12.3998	6.06436	2.64582	0.505688	3.86682	3.64996	2.7132	3.61585	6.86899	14.8569	8.44149	0.745919	5.45569	2.33856	10.4207	1.6577	6.90791	2.41926	13.5313	2.75496	7.13272	3.14569	12.9022	3.15144	3.01486
12.4065	6.07254	2.64664	0.505881	3.86761	3.647	2.71572	3.61996	6.86512	14.8154	8.42885	0.746299	5.46316	2.34118	10.4252	1.65845	6.90343	2.41555	13.5458	2.7562	7.15205	3.14946	12.8823	3.14692	3.02067
12.4131	6.08065	2.64746	0.506091	3.86814	3.6435	2.71833	3.62394	6.86114	14.7733	8.41612	0.746705	5.4704	2.34373	10.4297	1.65921	6.89889	2.41183	13.5602	2.75733	7.17153	3.15326	12.8622	3.14249	3.02647
12.4198	6.08871	2.64829	0.506319	3.86841	3.63949	2.72103	3.62779	6.85705	14.7307	8.40332	0.747137	5.4774	2.34624	10.4339	1.65997	6.89428	2.40813	13.5745	2.75836	7.19115	3.15708	12.8419	3.13814	3.03224
12.4265	6.09669	2.64912	0.506564	3.86843	3.63499	2.72382	3.63151	6.85288	14.6875	8.39043	0.747594	5.48415	2.34868	10.438	1.66074	6.88959	2.40443	13.5888	2.75929	7.21093	3.16094	12.8214	3.13387	3.03798
12.4331	6.10461	2.64996	0.506824	3.8682	3.63	2.72671	3.63512	6.84861	14.6439	8.37745	0.748079	5.49066	2.35107	10.4421	1.66152	6.88485	2.40074	13.6031	2.76011	7.23086	3.16482	12.8006	3.12965	3.0437
12.4398	6.11247	2.6508	0.507101	3.86774	3.62456	2.7297	3.63862	6.84425	14.5997	8.3644	0.74859	5.4969	2.35341	10.4461	1.66231	6.88005	2.39706	13.6174	2.76083	7.25095	3.16873	12.7795	3.12549	3.04939
12.4465	6.12027	2.65165	0.507395	3.86705	3.61867	2.73279	3.642	6.83981	14.5551	8.35127	0.749128	5.50289	2.35568	10.45	1.66311	6.87519	2.3934	13.6318	2.76145	7.27121	3.17266	12.7581	3.12138	3.05505
12.4531	6.128	2.65251	0.507704	3.86614	3.61237	2.736	3.64528	6.8353	14.51	8.33807	0.749694	5.50861	2.35789	10.454	1.66391	6.87027	2.38975	13.6461	2.76197	7.29163	3.17662	12.7363	3.11729	3.06068
12.4598	6.13567	2.65337	0.50803	3.86503	3.60567	2.73931	3.64846	6.83071	14.4645	8.32479	0.750286	5.51406	2.36004	10.4579	1.66473	6.8653	2.38612	13.6604	2.76238	7.31223	3.18061	12.7142	3.11324	3.06627
12.4665	6.14327	2.65425	0.508369	3.86372	3.5986	2.74274	3.65154	6.82606	14.4186	8.31142	0.750906	5.51923	2.36213	10.462	1.66556	6.86028	2.38252	13.6748	2.76269	7.33299	3.18463	12.6918	3.1092	3.07183
12.4731	6.15082	2.65513	0.508724	3.86222	3.59119	2.74629	3.65453	6.82134	14.3722	8.29798	0.751553	5.52413	2.36416	10.4661	1.6664	6.85521	2.37893	13.6892	2.76289	7.35393	3.18867	12.6689	3.10516	3.07734
12.4798	6.1583	2.65602	0.509095	3.86055	3.58345	2.74997	3.65743	6.81657	14.3255	8.28447	0.752227	5.52873	2.36612	10.4703	1.66726	6.85009	2.37536	13.7037	2.76299	7.37505	3.19275	12.6457	3.10112	3.08282
12.4865	6.16573	2.65692	0.509479	3.85872	3.57542	2.75377	3.66025	6.81175	14.2785	8.27088	0.752929	5.53305	2.36802	10.4747	1.66813	6.84493	2.37182	13.7183	2.76299	7.39636	3.19685	12.622	3.09706	3.08825
12.4931	6.1731	2.65784	0.509878	3.85673	3.56712	2.7577	3.663	6.80688	14.2311	8.25721	0.753657	5.53708	2.36986	10.4792	1.669	6.83973	2.3683	13.7329	2.76289	7.41784	3.20097	12.5979	3.09299	3.09364
12.4998	6.18041	2.65876	0.51029	3.85461	3.55857	2.76177	3.66567	6.80197	14.1834	8.24347	0.754413	5.54081	2.37163	10.4839	1.6699	6.83448	2.36482	13.7476	2.76269	7.4395	3.20512	12.5733	3.08888	3.09899
12.5065	6.18767	2.6597	0.510716	3.85235	3.54981	2.76597	3.66828	6.79702	14.1354	8.22964	0.755195	5.54424	2.37334	10.4888	1.6708	6.8292	2.36136	13.7624	2.76239	7.46135	3.20931	12.5482	3.08473	3.10428
12.5131	6.19488	2.66065	0.511156	3.84999	3.54086	2.77031	3.67083	6.79204	14.0871	8.21574	0.756004	5.54737	2.37498	10.494	1.67172	6.82388	2.35793	13.7772	2.76199	7.4834	3.21352	12.5227	3.08054	3.10953
12.5198	6.20204	2.66162	0.511608	3.84752	3.53174	2.7748	3.67332	6.78703	14.0386	8.20176	0.756839	5.5502	2.37655	10.4994	1.67265	6.81853	2.35453	13.7922	2.76149	7.50561	3.21776	12.4966	3.07629	3.11472
12.5265	6.20916	2.6626	0.512073	3.84497	3.52249	2.77944	3.67576	6.78199	13.9899	8.1877	0.7577	5.55271	2.37806	10.5051	1.6736	6.81313	2.35117	13.8073	2.76089	7.52804	3.22203	12.47	3.07198	3.11987
12.5331	6.21623	2.66359	0.512551	3.84235	3.51313	2.78422	3.67816	6.77693	13.9409	8.17356	0.758587	5.55492	2.3795	10.5111	1.67456	6.80771	2.34784	13.8225	2.76019	7.55063	3.22633	12.4429	3.06761	3.12496
12.5398	6.22326	2.66461	0.513039	3.83966	3.50369	2.78917	3.68052	6.77185	13.8918	8.15934	0.759499	5.55681	2.38087	10.5174	1.67553	6.80225	2.34455	13.8379	2.7594	7.57342	3.23066	12.4153	3.06315	3.12999
12.5465	6.23026	2.66563	0.51354	3.83693	3.4942	2.79426	3.68285	6.76677	13.8425	8.14504	0.760435	5.5584	2.38218	10.5241	1.67652	6.79677	2.3413	13.8533	2.75851	7.59641	3.23502	12.3871	3.05862	3.13497
12.5531	6.23722	2.66668	0.514053	3.83417	3.48468	2.79951	3.68514	6.76167	13.7931	8.13065	0.761397	5.55967	2.38342	10.5311	1.67751	6.79124	2.33808	13.8689	2.75752	7.61957	3.2394	12.3583	3.05399	3.13989
12.5598	6.24416	2.66774	0.514576	3.83139	3.47516	2.80493	3.68741	6.75657	13.7436	8.11618	0.762382	5.56064	2.38459	10.5385	1.67852	6.7857	2.33491	13.8847	2.75644	7.64293	3.24382	12.329	3.04927	3.14476
12.5665	6.25107	2.66882	0.51511	3.82861	3.46566	2.81051	3.68967	6.75147	13.6939	8.10163	0.763391	5.56128	2.38569	10.5462	1.67955	6.78012	2.33178	13.9006	2.75527	7.66647	3.24827	12.2991	3.04446	3.14956
12.5731	6.25796	2.66992	0.515654	3.82584	3.45622	2.81626	3.69192	6.74637	13.6442	8.08699	0.764422	5.56161	2.38673	10.5544	1.68058	6.7745	2.32869	13.9166	2.75401	7.6902	3.25275	12.2686	3.03955	3.15431
12.5798	6.26482	2.67104	0.516208	3.82309	3.44686	2.82217	3.69415	6.74128	13.5945	8.07226	0.765477	5.56162	2.3877	10.5631	1.68163	6.76886	2.32565	13.9327	2.75266	7.71412	3.25727	12.2375	3.03452	3.15899
12.5865	6.27168	2.67218	0.516772	3.82039	3.43759	2.82826	3.69639	6.73619	13.5447	8.05745	0.766553	5.56132	2.38861	10.5721	1.68269	6.76319	2.32265	13.9491	2.75122	7.73821	3.26181	12.2058	3.0294	3.16361
12.5931	6.27853	2.67334	0.517346	3.81773	3.42846	2.83452	3.69863	6.73112	13.4949	8.04255	0.76765	5.56071	2.38944	10.5816	1.68375	6.75749	2.3197	13.9655	2.74969	7.76249	3.26639	12.1736	3.02416	3.16817
12.5998	6.28537	2.67453	0.517929	3.81515	3.41947	2.84095	3.70087	6.72608	13.4452	8.02756	0.768768	5.55979	2.39022	10.5916	1.68483	6.75176	2.3168	13.9821	2.74808	7.78695	3.271	12.1407	3.01882	3.17267
12.6065	6.2922	2.67573	0.51852	3.81264	3.41065	2.84755	3.70313	6.72105	13.3954	8.01248	0.769906	5.55856	2.39092	10.6021	1.68592	6.74599	2.31394	13.9989	2.74638	7.81159	3.27565	12.1072	3.01335	3.1771
12.6131	6.29905	2.67696	0.51912	3.81022	3.40203	2.85433	3.70541	6.71604	13.3458	7.9973	0.771065	5.55702	2.39156	10.613	1.68702	6.7402	2.31114	14.0158	2.7446	7.8364	3.28033	12.0731	3.00778	3.18147
12.6198	6.3059	2.67821	0.519728	3.80791	3.39362	2.86129	3.70771	6.71107	13.2962	7.98204	0.772241	5.55517	2.39214	10.6244	1.68813	6.73437	2.30839	14.0328	2.74273	7.86138	3.28504	12.0385	3.0021	3.18578
12.6265	6.31276	2.67949	0.520345	3.80572	3.38544	2.86843	3.71003	6.70612	13.2467	7.96668	0.773436	5.55302	2.39265	10.6363	1.68925	6.72851	2.30569	14.05	2.74079	7.88654	3.28979	12.0032	2.99629	3.19002
12.6331	6.31963	2.68079	0.520969	3.80366	3.37751	2.87574	3.71239	6.70121	13.1973	7.95123	0.774649	5.55057	2.39309	10.6488	1.69037	6.72261	2.30304	14.0674	2.73876	7.91185	3.29458	11.9674	2.99038	3.1942
12.6398	6.32653	2.68212	0.521601	3.80174	3.36986	2.88323	3.71479	6.69634	13.1481	7.93569	0.775878	5.54782	2.39348	10.6617	1.69151	6.71668	2.30045	14.0848	2.73666	7.93734	3.2994	11.9309	2.98436	3.19831
12.6465	6.33346	2.68347	0.52224	3.79997	3.36249	2.8909	3.71722	6.69152	13.0991	7.92006	0.777124	5.54477	2.3938	10.6752	1.69265	6.71072	2.29791	14.1024	2.73449	7.96297	3.30425	11.8939	2.97823	3.20236
12.6531	6.34041	2.68485	0.522886	3.79836	3.35543	2.89875	3.7197	6.68673	13.0502	7.90433	0.778386	5.54144	2.39406	10.6892	1.6938	6.70471	2.29543	14.1202	2.73224	7.98877	3.30915	11.8562	2.97199	3.20634
12.6598	6.3474	2.68626	0.523538	3.79693	3.34868	2.90678	3.72223	6.682	13.0015	7.88851	0.779663	5.53782	2.39426	10.7037	1.69495	6.69867	2.29301	14.138	2.72992	8.01472	3.31408	11.8181	2.96565	3.21026
12.6665	6.35442	2.6877	0.524198	3.79568	3.34226	2.91498	3.72481	6.67731	12.9531	7.87259	0.780955	5.53392	2.39441	10.7187	1.69611	6.69258	2.29064	14.156	2.72753	8.04082	3.31905	11.7793	2.95921	3.21412
12.6731	6.36148	2.68916	0.524864	3.79462	3.33619	2.92336	3.72745	6.67268	12.9049	7.85657	0.78226	5.52974	2.39449	10.7343	1.69728	6.68645	2.28834	14.174	2.72507	8.06705	3.32406	11.74	2.95268	3.21791
12.6798	6.36859	2.69065	0.525537	3.79377	3.33048	2.93191	3.73015	6.66811	12.8569	7.84047	0.783579	5.52528	2.39451	10.7504	1.69845	6.68028	2.28609	14.1922	2.72254	8.09344	3.32911	11.7001	2.94606	3.22163
12.6865	6.37575	2.69217	0.526214	3.79312	3.32513	2.94064	3.73291	6.6636	12.8093	7.82427	0.784911	5.52056	2.39448	10.7671	1.69962	6.67406	2.2839	14.2105	2.71995	8.11995	3.3342	11.6598	2.93935	3.2253
12.6931	6.38296	2.69372	0.526899	3.79269	3.32015	2.94954	3.73573	6.65915	12.7619	7.80798	0.786254	5.51558	2.3944	10.7843	1.7008	6.6678	2.28178	14.2288	2.71729	8.1466	3.33932	11.6188	2.93256	3.2289
12.6998	6.39024	2.6953	0.527589	3.79248	3.31556	2.95861	3.73863	6.65478	12.7149	7.7916	0.78761	5.51034	2.39425	10.802	1.70199	6.66148	2.27971	14.2472	2.71458	8.17337	3.34449	11.5774	2.92569	3.23244
12.7065	6.39756	2.69691	0.528285	3.79249	3.31136	2.96784	3.7416	6.65047	12.6682	7.77512	0.788977	5.50485	2.39406	10.8202	1.70318	6.65512	2.27771	14.2656	2.7118	8.20026	3.34971	11.5355	2.91876	3.23591
12.7131	6.40496	2.69855	0.528987	3.79274	3.30755	2.97724	3.74465	6.64623	12.6218	7.75855	0.790354	5.49912	2.39382	10.839	1.70437	6.6487	2.27577	14.2841	2.70897	8.22727	3.35496	11.4931	2.91176	3.23933
12.7198	6.41243	2.70022	0.529693	3.79323	3.30415	2.98679	3.74777	6.64207	12.5758	7.7419	0.791741	5.49315	2.39352	10.8583	1.70556	6.64223	2.27389	14.3027	2.70609	8.25439	3.36026	11.4502	2.90471	3.24268
12.7265	6.41996	2.70192	0.530405	3.79396	3.30115	2.99651	3.75098	6.63799	12.5302	7.72515	0.793139	5.48694	2.39318	10.8781	1.70676	6.6357	2.27208	14.3213	2.70315	8.28162	3.36559	11.4069	2.8976	3.24598
12.7331	6.42757	2.70365	0.531124	3.79493	3.29855	3.00637	3.75427	6.63399	12.485	7.70832	0.794546	5.48051	2.39279	10.8984	1.70796	6.62912	2.27033	14.3399	2.70016	8.30895	3.37098	11.3631	2.89046	3.24922
12.7398	6.43525	2.70541	0.531846	3.79615	3.29637	3.01639	3.75764	6.63007	12.4402	7.6914	0.795961	5.47387	2.39235	10.9192	1.70916	6.62247	2.26865	14.3584	2.69712	8.33638	3.3764	11.3189	2.88328	3.2524
12.7465	6.44301	2.70721	0.532574	3.79762	3.29459	3.02655	3.7611	6.62624	12.3958	7.6744	0.797386	5.46701	2.39187	10.9405	1.71036	6.61577	2.26703	14.377	2.69403	8.36389	3.38188	11.2742	2.87607	3.25552
12.7531	6.45086	2.70903	0.533308	3.79933	3.29322	3.03685	3.76465	6.6225	12.3519	7.65732	0.798818	5.45996	2.39135	10.9624	1.71157	6.609	2.26547	14.3956	2.69091	8.3915	3.38739	11.2292	2.86885	3.25858
12.7598	6.45879	2.71089	0.534046	3.8013	3.29226	3.04729	3.76829	6.61885	12.3084	7.64016	0.800259	5.4527	2.39078	10.9847	1.71278	6.60216	2.26398	14.4141	2.68774	8.41918	3.39296	11.1838	2.86161	3.26159
12.7665	6.46681	2.71278	0.53479	3.80351	3.2917	3.05786	3.77202	6.61529	12.2654	7.62292	0.801707	5.44526	2.39018	11.0075	1.71399	6.59526	2.26256	14.4326	2.68452	8.44695	3.39857	11.138	2.85436	3.26455
12.7731	6.47491	2.71469	0.535538	3.80597	3.29154	3.06855	3.77584	6.61183	12.2229	7.6056	0.803162	5.43765	2.38954	11.0307	1.7152	6.5883	2.2612	14.4511	2.68127	8.47478	3.40422	11.0919	2.84713	3.26745
12.7798	6.4831	2.71664	0.536292	3.80868	3.29178	3.07936	3.77976	6.60846	12.1809	7.58822	0.804626	5.42986	2.38886	11.0545	1.71642	6.58126	2.25991	14.4694	2.67799	8.50268	3.40992	11.0454	2.8399	3.2703
12.7865	6.49138	2.71862	0.53705	3.81163	3.2924	3.09029	3.78377	6.60519	12.1395	7.57075	0.806095	5.42191	2.38816	11.0787	1.71764	6.57415	2.25869	14.4877	2.67467	8.53064	3.41567	10.9986	2.83269	3.27311
12.7931	6.49976	2.72063	0.537816	3.81482	3.29342	3.10132	3.78788	6.60202	12.0985	7.55323	0.807572	5.4138	2.38741	11.1033	1.71886	6.56697	2.25753	14.5059	2.67132	8.55866	3.42147	10.9516	2.8255	3.27586
12.7998	6.50823	2.72266	0.538584	3.81825	3.29481	3.11245	3.79207	6.59895	12.0581	7.53564	0.809056	5.40555	2.38664	11.1284	1.72008	6.55972	2.25643	14.524	2.66794	8.58674	3.42731	10.9042	2.81836	3.27856
12.8065	6.51679	2.72473	0.53936	3.82192	3.29657	3.12367	3.79637	6.59598	12.0182	7.51798	0.810546	5.39716	2.38584	11.1539	1.72131	6.5524	2.25541	14.542	2.66453	8.61485	3.43321	10.8566	2.81125	3.28122
12.8131	6.52545	2.72683	0.540139	3.82581	3.29869	3.13498	3.80076	6.59312	11.979	7.50027	0.812043	5.38865	2.38501	11.1799	1.72254	6.545	2.25445	14.5599	2.6611	8.64302	3.43915	10.8087	2.8042	3.28383
12.8198	6.5342	2.72895	0.540925	3.82992	3.30116	3.14637	3.80524	6.59036	11.9402	7.48249	0.813547	5.38001	2.38416	11.2062	1.72377	6.53753	2.25356	14.5776	2.65765	8.67121	3.44514	10.7607	2.7972	3.2864
12.8265	6.54305	2.73111	0.541717	3.83425	3.30397	3.15782	3.80981	6.58771	11.9021	7.46467	0.815058	5.37126	2.38328	11.2329	1.72501	6.52998	2.25273	14.5952	2.65418	8.69945	3.45117	10.7124	2.79027	3.28892
12.8331	6.55199	2.73329	0.542513	3.8388	3.30712	3.16934	3.81448	6.58516	11.8646	7.44681	0.816575	5.36241	2.38238	11.2601	1.72625	6.52236	2.25198	14.6126	2.65068	8.7277	3.45726	10.6639	2.78341	3.2914
12.8398	6.56102	2.73549	0.543315	3.84355	3.31058	3.18091	3.81924	6.58273	11.8277	7.42889	0.818099	5.35346	2.38147	11.2876	1.7275	6.51466	2.25128	14.6299	2.64718	8.75599	3.46339	10.6153	2.77663	3.29384
12.8465	6.57015	2.73772	0.544123	3.84849	3.31434	3.19253	3.82408	6.5804	11.7914	7.41093	0.819629	5.34444	2.38053	11.3155	1.72876	6.50689	2.25066	14.647	2.64366	8.78431	3.46957	10.5665	2.76993	3.29625
12.8531	6.57938	2.73998	0.544936	3.85363	3.3184	3.20418	3.82902	6.57817	11.7557	7.39294	0.821168	5.33533	2.37959	11.3437	1.73002	6.49904	2.2501	14.6639	2.64012	8.81263	3.4758	10.5176	2.76334	3.29862
12.8598	6.58868	2.74226	0.545756	3.85894	3.32274	3.21585	3.83403	6.57605	11.7207	7.37491	0.822712	5.32616	2.37862	11.3723	1.73129	6.49112	2.2496	14.6806	2.63658	8.84097	3.48207	10.4685	2.75684	3.30095
12.8665	6.5981	2.74457	0.546582	3.86444	3.32734	3.22755	3.83913	6.57405	11.6864	7.35685	0.824265	5.31693	2.37765	11.4012	1.73256	6.48313	2.24918	14.6972	2.63304	8.86932	3.48839	10.4194	2.75044	3.30324
12.8731	6.60759	2.74689	0.547413	3.87009	3.3322	3.23925	3.84432	6.57215	11.6527	7.33876	0.825825	5.30764	2.37667	11.4305	1.73385	6.47506	2.24882	14.7135	2.62948	8.89767	3.49475	10.3701	2.74416	3.30551
12.8798	6.61718	2.74924	0.548252	3.87591	3.33728	3.25095	3.84958	6.57035	11.6196	7.32065	0.827391	5.29832	2.37568	11.4601	1.73514	6.46691	2.24852	14.7296	2.62593	8.92604	3.50117	10.3208	2.738	3.30774
12.8865	6.62685	2.75161	0.549097	3.88187	3.34259	3.26264	3.85491	6.56867	11.5873	7.30253	0.828967	5.28897	2.37469	11.4899	1.73645	6.4587	2.24829	14.7455	2.62237	8.9544	3.50762	10.2715	2.73196	3.30994
12.8931	6.63661	2.754	0.549948	3.88797	3.34809	3.27431	3.86032	6.56709	11.5556	7.28439	0.83055	5.27959	2.37369	11.5201	1.73777	6.45042	2.24812	14.7612	2.61882	8.98275	3.51412	10.2221	2.72605	3.31211
12.8998	6.64645	2.75641	0.550805	3.8942	3.35379	3.28594	3.8658	6.56562	11.5246	7.26624	0.832142	5.2702	2.37269	11.5506	1.73909	6.44207	2.24802	14.7767	2.61527	9.01111	3.52067	10.1727	2.72028	3.31426
12.9065	6.65637	2.75884	0.551669	3.90055	3.35965	3.29753	3.87134	6.56425	11.4944	7.24808	0.833742	5.26079	2.37169	11.5813	1.74044	6.43366	2.24799	14.7919	2.61172	9.03945	3.52725	10.1232	2.71464	3.31638
12.9131	6.66638	2.76128	0.55254	3.907	3.36566	3.30907	3.87694	6.56298	11.4648	7.22993	0.835351	5.25139	2.37069	11.6123	1.74179	6.42518	2.24801	14.8069	2.60818	9.06779	3.53387	10.0738	2.70914	3.31848
12.9198	6.67645	2.76373	0.553419	3.91356	3.3718	3.32055	3.8826	6.56183	11.436	7.21178	0.83697	5.242	2.3697	11.6435	1.74316	6.41664	2.24811	14.8216	2.60466	9.09611	3.54054	10.0244	2.7038	3.32055
12.9265	6.68661	2.76621	0.554304	3.9202	3.37806	3.33195	3.88831	6.56077	11.4078	7.19363	0.838598	5.23262	2.36871	11.675	1.74455	6.40804	2.24826	14.8361	2.60114	9.12442	3.54724	9.97502	2.6986	3.32261
12.9331	6.69683	2.76869	0.555196	3.92692	3.38441	3.34327	3.89407	6.55981	11.3804	7.1755	0.840235	5.22326	2.36773	11.7068	1.74596	6.39938	2.24848	14.8503	2.59764	9.15272	3.55398	9.92569	2.69356	3.32464
12.9398	6.70713	2.77119	0.556095	3.93371	3.39084	3.3545	3.89987	6.55895	11.3538	7.15738	0.841883	5.21394	2.36676	11.7387	1.74738	6.39067	2.24876	14.8643	2.59415	9.181	3.56075	9.8764	2.68868	3.32665
12.9465	6.71749	2.77369	0.557002	3.94055	3.39732	3.36562	3.90571	6.5582	11.3279	7.13929	0.843541	5.20465	2.3658	11.7709	1.74882	6.38191	2.24911	14.878	2.59069	9.20926	3.56755	9.8272	2.68396	3.32865
12.9531	6.72791	2.77621	0.557918	3.94744	3.40385	3.37662	3.91158	6.55753	11.3027	7.12121	0.84521	5.19541	2.36485	11.8033	1.75029	6.3731	2.24952	14.8914	2.58724	9.23751	3.57439	9.77806	2.6794	3.33063
12.9598	6.73839	2.77874	0.558839	3.95437	3.41039	3.38749	3.91748	6.55697	11.2783	7.10317	0.84689	5.18622	2.36392	11.8359	1.75178	6.36425	2.24999	14.9046	2.58381	9.26573	3.58125	9.72901	2.67501	3.33259
12.9665	6.74894	2.78127	0.559769	3.96132	3.41694	3.39823	3.9234	6.5565	11.2547	7.08517	0.848581	5.17709	2.363	11.8687	1.75328	6.35535	2.25052	14.9175	2.58041	9.29393	3.58814	9.68006	2.67078	3.33454
12.9731	6.75953	2.78381	0.560707	3.96829	3.42346	3.40882	3.92933	6.55612	11.2318	7.0672	0.850284	5.16803	2.3621	11.9016	1.75482	6.34641	2.25111	14.9301	2.57703	9.32211	3.59506	9.63122	2.66673	3.33648
12.9798	6.77018	2.78635	0.561652	3.97526	3.42995	3.41925	3.93528	6.55583	11.2096	7.04927	0.851998	5.15903	2.36122	11.9348	1.75638	6.33745	2.25177	14.9425	2.57368	9.35028	3.60199	9.58248	2.66285	3.3384
12.9865	6.78087	2.7889	0.562605	3.98223	3.43638	3.4295	3.94122	6.55564	11.1883	7.03139	0.853726	5.15011	2.36036	11.9681	1.75797	6.32845	2.25248	14.9546	2.57036	9.37841	3.60895	9.53387	2.65914	3.34032
[truncated: 5,552 more rows]
